# Supplementary material for: Comparative chloroplast genomics of Rutaceae: structural divergence, adaptive evolution, and phylogenomic implications
Source: Front Plant Sci. 2025 Oct 3;16:1675536. doi: 10.3389/fpls.2025.1675536 (PMC12531857; doi:10.3389/fpls.2025.1675536)
Supplement: Supplementary Table 6 — Parity rule 2 (PR2) analysis of base composition at third codon positions in Rutaceae chloroplast genomes. [file Table6.xlsx]

## Sheet: Supplementary Table_S6_Parity R
Species	GenBank Accession	G3/(G3+C3)	A3/(A3+T3)	ENC	gene_name	seq
Boronia ternata	OL591162	0.4615	0.5125	54.089	rps12	ATGCCGACTATTAAACAACTTATTAGAAACCCAAGACAGCCAATCAGAAACGTTACAAAATCCCCCGCTCTTGGGGGATGCCCTCAGCGCCGAGGAACATGTACAAGGGTGTATACTATCACCCCCAAAAAACCAAACTCTGCCTTACGTAAAGTTGCCAGAGTACGATTAACCTCTGGGTTTGAAATCACTGCTTATATACCTGGTATTGGCCATAATTCACAAGAACATTCTGTAGTCTTAGTAAGAGGGGGGAGGGTTAAGGATTTACCCGGTGTGAGATATCACATTGTTCGAGGAACCCTAGATGCTGTCGGAGTAAAGGATCGTCAACAAGGGCGTTCTAGTGCGTTGTAG
Boronia ternata	OL591162	0.3694	0.3333	42.8954	psbA	ATGACTGCAATTTTAGAGAGACGCGAAAGCGAACGCCTATGGGGTCGCTTCTGTAACTGGATAACCAGCACTGAAAACCGCCTTTACATTGGATGGTTTGGTGTTTTGATGATCCCTACTTTATTGACCGCAACTTCTGTATTTATTATCGCCTTCATTGCTGCCCCTCCAGTAGATATTGATGGTATTCGTGAACCTGTTTCTGGATCTCTACTTTATGGAAACAATATTATTTCTGGTGCAATTATTCCTACTTCTGCAGCTATAGGTTTGCACTTTTACCCGATATGGGAAGCGGCATCCGTCGATGAATGGTTATATAATGGCGGTCCTTATGAGTTAATTGTTTTACACTTCTTACTTGGTGTAGCTTGTTACATGGGTCGTGAGTGGGAACTT…
Boronia ternata	OL591162	0.5583	0.3914	52.8002	matK	ATGAAGGAATTTCAAGTCTATTTAGAACTAGATAGATCTCAACAAGACGACTTACTATACCCGCTTCTTTTTCGGGAGTATATTTATGCACTTGCTCATGATCATGGTTTAAATAGTTCGACGATTTCATTGGAAAGCGGGGGGTATGACAATAAATCTAGTTCACTGAGTGTGAAACGGTTAATTACTCGAATGTATCGACCGATTAATTTGAGTATTGCTGCTAATGAGTCTAACAAAAATCCAATTTTTTGGCATAACAATAAGTTGTATTCTCAAATTATATCAGAGGGATTTGCTGTCGTGGTGGAAATTCCATTTTCCCTACGGTTGGTAGCTTTTTTAGAAGGGAAAGAATTTGAAAAATCTTCTAATTTCCAATCAATTCATTCAATATTT…
Boronia ternata	OL591162	0.5789	0.4143	56.2341	rps16	ATGGTAAAACTTCGTTTGAAACGATGTGGTAGAAAGCAACGTGCTGTTTATCGAATCGTTGCAATTAATGGTCGATCCCGAAGAGAAGGAAGAGATCTTCGGAAAGTGGGTTTTTATGATCCGATAAATAATCAAACCCATTTAAATGTTCCTGCTATTCTATATTTCCTTGACAAGGGTGCCCAACTTACAAGAACCGTTCATGATATTTCAAAGAAAGCGGGGATTTTTACAGAACTTAGTCTTAATCAAACGAAATTCTATTAA
Boronia ternata	OL591162	0.3684	0.3488	56.4837	psbK	ATGATTAATATCTTTCGTTTAATGTATATCTGTCTTAATTCCGTCCTTTATTCAAGTAGTTTTTTATTCGCCAAATTGCCCGAGGCCTACGCCTTTTTGAATCCAATTGTAGATGTTATGCCAGTAATACCAGTTCTTTTTTTTCTCTTAGCCTTTGTTTGGCAAGCTGCTGTAAGTTTTCGATGA
Boronia ternata	OL591162	0.25	0.4286	61	psbI	ATGCTTACTCTCAAACTCTTTGTTTACACCGTAGTGATATTCTTTGTTTCTCTCTTCATCTTCGGATTCCTGTCTAATGATCCAGGGCGTAATCCCGGACGCGAAGAATAA
Boronia ternata	OL591162	0.4795	0.5	48.5718	atpA	ATGGCAACAATTAAAGCCGACGAAATTAGTAATATTATCCGTGAACGCATTGAGCAATATAATAGAGAAGTAAAGGTTGTAAATATTGGTACCGTACTTCAAGTAGGCGACGGCATCGCCCGTATTTATGGTCTTGATGAAGTAATGGCAGGTGAATTAGTAGAATTTGAAGAGGGTACAATAGGCATTGCTCTTAATTTGGAATCCAATAATGTTGGTGTTGTTTTAATGGGTGACGGTTTAATGATACAAGAGGGAAGTTCTGTAAAAGCAACTGGAAAAATTGCTCAGATACCAGTAAGCGAAGCTTTTTTAGGTCGTGTTATAAATGCCCTGGCTAAACCTATTGATGGTCGAGGTGAAATTTCAGCTTCTGAATCTCGATTAATTGAATCTCCC…
Boronia ternata	OL591162	0.625	0.4959	52.4902	atpF	ATGAAAAATGTAACCTATTCGTTCGTTTCTTTGATTCACTGGCCATTCGCCGGGAGTTTTGGGTTTAATACCGATATTTTAGCAACTAATCCAATAAATCTAAGTGTAGTGATTGGTGTATTGATCTTTTTTGGAAAGGGAGTGTTAAGTGATTTATTAGATAATCGCAAACGGAGGATTTTGAATAGTATTCGAAATTCAGAAGAACTGCAGGACGGGGCCGTTGAACGGCTGGAAAAAGCCCGGGCCCGGTTACGGAAAGTCGAAATAGAAGCGGATCAGTTTCGAGCGGACGGATATTCTGAGATAGAACGAGAAAAATTGAATTTCATTAATTCAACTTCTAAGACTTTGTACCAATTAGAAAATTACAAAAATGAAACCATTCATTTTGAACAA…
Boronia ternata	OL591162	0.7407	0.3455	52.2037	atpH	ATGAATCCACTGATTTCTGCCGCTTCCGTTATTGCCGCTGGGTTGGCTGTTGGGCTTGCTTCTATTGGACCTGGGGTTGGTCAAGGTACTGCTGCGGGCCAAGCAGTCGAGGGGATTGCGAGACAACCCGAGGCGGAGGGAAAAATACGAGGTACGTTATTGCTTAGTCTGGCTTTTATGGAAGCTTTAACTATTTATGGGCTGGTTGTAGCCTTAGCACTTCTATTTGCGAATCCTTTTGTTTAA
Boronia ternata	OL591162	0.4359	0.4294	52.0668	atpI	ATGAATGTTCTATCATGTTCCATCAACACACTGAAGGCGTTATACGATATATCCGGTGTGGAAGTAGGCCAACATTTCTATTGGAAAATAGGCGGGTTCCAAGTCCACGCCCAAGTACTTATTACTTCTTGGGTTGTAATTGCTGTCTTATTAAGTTCAGCCTTTCTAGCCGTTCGGAATCCACAAACCGTTCCAACTGCTAGTCAAAATTTCTTCGAATATGTCCTTGAATTCATTCGAGACGTGAGCAAAACTCAGATTGGAGAAGAATATGGTCCATGGGTTCCCTTTATTGGAACTATGTTTCTTTTTATTTTTGTTTCGAATTGGTCAGGTGCTCTTTTACCGTGGAAAATCATCGAGTTGCCTCATGGGGAGTTAGCCGCCCCCACGAATGAT…
Boronia ternata	OL591162	0.6	0.436	52.0269	rps2	ATGGCAAGAAGATATTGGAACATCCATTTGGAAGAGATGATGGAAGCCGGAATTCATTTTGGTCATGGTACTCGGAAATGGAATCCTAGAATGGCACCTTATATATCTGCAAAACACAAAGGTATTCATATTACAAATCTTACTCGAACTGCTCGTTTTTTATCAGAAGCTTGTGATTTAGTTTTTGATGCAGCAAGTAGAGGAAAACTATTCTTAATTGTTGGTACTAAAAATAAAGCAGCTGATTCAGTCGCGCGAGCTGCAATAAAGGCTCGGTGTCATTATGTTAATAAAAAATGGCTCGGTGGTATGTTAACGAATTGGTCCACTACAGAAACGAGACTTCACAAGCTCAGGGATTTGAGAACGGAACAAAAAAAGGGGAGATTTGACAGTCTT…
Boronia ternata	OL591162	0.5595	0.4803	51.4035	rpoC2	ATGGCAGAACGAGTGAGTCTGGTCTTTCACAATAAAATGATAGATGGAACTGCTATTAAACGACTTATTAGCAGGTTAATAGATCACTTCGGGATGGCACATACATCACACATCCTGGATCAAGTAAAGGCCCTGGGGTTCCAGCAAGCCACTGCTACATCTATTTCATTAGGCATTGATGATCTTTTAACGATACCTTCTAAGCGATGGCTAGTCCAAGATGCTGAACAACAAAGTTTTATTTTGGAAAAACACCATCATTATGGGAATGTCCACGCAATCGAAAAACTACGTCAATCCATTGAGATATGGTATGCTACAAGTGAATATTTGCGACAAGAAATGAATCCTAATTTTAGGATGACCGATCCCTTTAATCCAGTACATATAATGTCTTTT…
Boronia ternata	OL591162	0.6237	0.4663	47.9791	rpoC1	ATGATTGATCGATATAAACATCAACAACTCCGAATTGGATCAGTTTCTCCGCAACAAATAAGCGCTTGGTCCACTAAAATCCTACCTAATGGAGAGATAGTTGGAGAAGTGACAAAACCCTATACTTTTCATTACAAAACCAATAAACCGGAAAAAGATGGATTATTTTGTGAAAGAATTTTTGGGCCTATTAAAAGTGGAATTTGCGCTTGTGGAAATTATCGAATAATCGGAGATGAAAAAGAAAACCCGCAATTTTGTGAACAATGTGGAGTTGAATTTGTTGATTCTCGGATACGAAGATATCAAATGGGGTACATAAAACTTGGGTGCCCAGTAACCCACGTGTGGTATTTGAAACGTCTTCCTAGTTATATCGCGAATCTTTTAGATAAACCT…
Boronia ternata	OL591162	0.6215	0.4799	50.3752	rpoB	ATGCTCAGAGATGGAAATGAGGGAATGTCTACAATACCTGGGTTGAATCAGATACAATTTGAAGGCTTTTGTAGATTCATTGATCAGGGCTTAATAGAAGAACTTTATAAGTTTCCAAAAATTTCAGATACAGATCAAGAAATTGAATTTCAATTATTTGTGGAAACATATCAATTGGTAGAACCCTTGCTAAAAGAAAGAGATGCTGTATATGAATCATTCACGTATTCTTCTGAATTATATGTATCCGCGGGATTAATTTGGAAAAGCCGAGGGGATATGCAGGACCAAACAATTTTTATTGGAAACATTCCTCTAATGAATCCTTTGGGAACTTCTATAGTAAATGGAATATACAGAATTGTCATCAATCAAATATTGCAAAGTCCCGGTATCTAT…
Boronia ternata	OL591162	0.5455	0.5263	29.2857	petN	ATGGATATAGTAAGTCTCGCTTGGGCTGCTTTAATGGTAGTCTTTACATTTTCCCTTTCGCTCGTAGTATGGGGAAGAAGTGGACTCTAG
Boronia ternata	OL591162	0.4	0.44	45.1818	psbM	ATGGAAGTAAATATTCTCGCATTTATTGCTACTACACTGTTCGTTCTAGTTCCTACTGCCTTTTTGCTTATAATATACGTAAAAACGGTCAGTCAAAATGACTAA
Boronia ternata	OL591162	0.4488	0.37	52.7391	psbD	ATGACTATAGCCCTTGGTAAATTTACCAAAGATGAAAAAGATTTATTTGATATTATGGATGACTGGTTACGGAGGGACCGATTCGTTTTTGTAGGTTGGTCCGGTCTATTGCTCTTTCCTTGCGCCTATTTCGCTTTAGGGGGTTGGTTCACAGGCACAACCTTTGTAACTTCATGGTATACCCATGGATTGGCCAGTTCCTATTTGGAAGGCTGCAACTTCTTAACCGCCGCAGTTTCGACTCCTGCTAATAGTTTATCGCATTCTTTGTTGTTACTGTGGGGTCCTGAAGCACAAGGGGATTTTACTCGTTGGTGTCAATTAGGCGGTCTTTGGACCTTTGTTGCTCTCCACGGTGCTTTCGGACTAATAGGTTTCATGTTACGTCAATTTGAACTT…
Boronia ternata	OL591162	0.4845	0.3953	49.8521	psbC	GTGGAAACGCTCTTTAATGGAACTTTAGCTGTAGCAGGTCGTGACCAAGAAACCACCGGGTTTGCTTGGTGGGCCGGGAATGCCCGACTTATCAATTTATCCGGTAAACTGCTGGGCGCTCATGTAGCCCATGCTGGATTAATCGTATTCTGGGCCGGAGCAATGAACCTATTTGAAGTGGCTCATTTCGTACCCGAAAAGCCCATGTATGAACAAGGATTAATTTTACTTCCCCACCTAGCTACTCTAGGCTGGGGGGTAGGCCCTGGCGGGGAAGTTATAGACACCTTTCCATACTTTGTATCTGGAGTACTTCACTTAATTTCCTCTGCTGTATTGGGCTTTGGCGGTATTTATCATGCCCTTCTGGGACCTGAGACTCTTGAAGAATCTTTTCCA…
Boronia ternata	OL591162	0.55	0.3488	58.2232	psbZ	ATGACTATTGCTTTCCAATTGGCTGTTTTTGCATTAATTGCTACTTCATCAATCTTACTGATTAGTGTACCCGTTGTATTTGCTTCTCCGGATGGTTGGTCGAGTAACAAAAATGCCGTATTGTCTGGTACATCAGTGTGGATTGGATTAGTCTTTCTGGTGGGTATCCTTAATTCTCTCATCTCTTAA
Boronia ternata	OL591162	0.7576	0.5441	61	rps14	ATGGCAAGGAAAAGTTTGATTCATAGGGAGAAGAAAAGGAAAAAATTGGAACAAAAATATCATTTGATTCGTCGATCCTCAAAAAAAGAAATAAACAAAGTTCTGTCGTTGAGCGATAAATGGAGAATTCATGGAAAGCTACAATCCTCACCGCGTAATAGTGCACCTACACGTCTTCATCGACGTTGTTTTTCGACCGGAAGGCCGAGAGCTAACTATCGAGACTTTGGACTATCTGGGCACAAACTTCGTGAAATGGTTCATGCATGTTTGTTGCCGGGGGCAACAAGATCAAGTTGGTAA
Boronia ternata	OL591162	0.5306	0.3776	49.9495	psaB	ATGGCATTAAGATTTCCAAGGTTTAGCCAAGGCTTAGCTCAGGACCCCACTACTCGTCGTATTTGGTTTGGTATTGCTACCGCACATGACTTTGAGAGTCATGATGATATTACTGAGGAACGTCTTTATCAGAATATTTTTGCTTCTCACTTCGGGCAATTAGCAATAATTTTTATGTGGACTTCCGGAAATCTCTTTCATGTAGCTTGGCAAGGAAATTTTGAAGCATGGGTACAGGACCCTTTACATGTAAGACCTATTGCTCATGCTATTTGGGATCCTCATTTTGGTCAACCGGCCGTGGAAGCTTTTTCTCGCGGGGGCGCTCTTGGCCCGGTGAATATCGCTTATTCTGGTGTTTATCAGTGGTGGTATACAATCGGGTTACGCACTAATGAG…
Boronia ternata	OL591162	0.5097	0.415	52.5387	psaA	ATGATTATTCGTTCGCCGGAATCAGAAGTAAAAATTTTGGTAGATAGGGATCCCATAAAAACTTCTTTCGAGGAATGGGCCAGACCGGGTCATTTCTCAAGAACCATAGCTAAGGGACCTGATACTACCACTTGGATCTGGAACCTACATGCTGATGCTCACGACTTCGATAGCCATACCAGTGATTTGGAGGAGATCTCTCGAAAAGTATTTAGTGCCCATTTTGGACAACTCTCCATCATTTTTCTTTGGCTGAGTGGCATGTATTTCCACGGTGCTCGTTTTTCCAATTATGAAGCCTGGCTAAGCGATCCTACTCACATTGGACCCAGCGCACAGGTGGTTTGGCCAATAGTGGGCCAAGAAATATTGAACGGTGATGTGGGCGGGGGTTTCCGA…
Boronia ternata	OL591162	0.5741	0.4397	51.1808	ycf3	ATGCCTAGATCGCGTATAAATGGAAATTTTATTGATAAGACCTTTTCAATTGTAGCCAATATATTATTACGAATAATTCCGACAACTTTAGGAGAAAAAGAGGCATTTAGCTATTACAGAGATGGTGCGATGTCAGCTCAATCTGAAGGCAATTATGCGGAAGCTTTACAGAATTATTATGAAGCTATGCGACTCGAAATTGATCCCTACGATCGAAGTTATATACTCTATAACATAGGCCTTATCCACACAAGTAACGGAGAACATACAAAAGCTTTAGAATATTATTTTCGGGCACTCGAGCGAAATCCATTTTTACCACAAGCTTTTAATAATATGGCTGTGATCTGTCATTACCGGGGAGAACAGGCCGTTCGTCAGGGAGATTCTGAAATTGCG…
Boronia ternata	OL591162	0.4909	0.4899	61	rps4	ATGTCACGTTACCGAGGGCCTCGTTTCAAAAAAATACGCCGTCTGGGGGCTTTGCCTGGACTAACGGGTAAAAGGCCTAGAGCCGGAAGCGATTTTAGAAACCAATCGCGCTCCGGAAAAAAGTCTCAATATCGAATTCGTTTAGAAGAAAAACAAAAATTGCGTTTTCATTATGGTCTTACAGAACGACAATTACTTAAATATGTTCGTATCGCCGGAAAAGCCAAAGGTTCAACCGGTCTGGTTTTACTACAATTACTTGAAATGCGTTTGGATAACATTCTTTTTCGATTGGGTATGGCTTCAACTATTCCTCAAGCCCGCCAATTAATTAACCATCGGCATATTTTAGTTAATGAGCGTATAGTCGATATACCAAGTTATCGTTGCAAACCCCGA…
Boronia ternata	OL591162	0.625	0.4175	61	ndhJ	ATGCAGGGTCGTTTGTCTGCTTGGCTAGTCAAGCATGGGGTAGTTCATAGATCTTTGGGCTTCGATTACCAAGGAATAGAAACTTTACAAATAAAGCCCGAGGATTGGCATTCCGTTGCTGTCATTTTGTATGTATATGGTTACAATTATCTACGCTCCCAATGTGCCTATGATGTAGCACCGGGTGGACTGTTAGCCAGTGTGTATCATCTTACGCGACTAAAGTATGGTGTAGATCAACCCGAAGAGATATGCATAAAAGTATTTGCTTCAAGGAGGAATCCTAAAACCCCATCTGTTTTCTGGGTTTGGAAAAGTGCGAATTTTCAAGAACGGGAATCTTATGATATGTTGGGACTCTTTTATGATAATCATCCACGGCTGAAACGTATCTTAATG…
Boronia ternata	OL591162	0.5286	0.443	60.7816	ndhK	ATGAATTCCATTGAATTTTCTTTACTTGATCGAACAACCCCAAATTCATTTATTTCAACTACATCAAACGATCTTTCCAATTGGTCAAGACTCGCCAGTTTATGGCCGCTTCTTTATGGTACCAGTTGTTGTTTCATTGAATTTGCTTCATTAATTGGCTCGCGGTTCGATTTTGACCGTTATGGACTGGTACCACGATCGAGCCCTAGACAGGCGGACCTAATTTTAACAGCCGGTACCGTAACAATGAAAATGGCTCCTTCCTTAGTGAGATTATATGAACAAATGCCGGAACCAAAATATGTTATTGCTATGGGAGCATGTACAATTACAGGGGGGATGTTCAGTACTGATTCGTATAGTACTGTTCGAGGAGTTGATAAGCTAATTCCTGTGGAT…
Boronia ternata	OL591162	0.5882	0.4368	61	ndhC	ATGTTTCTGCTTTACAAATATGATATTTTCTGGGCATTTCTAATAATATCAAGCGTTATTCCTATTTTGGCATTTCGAATTTCCTCATTTTTAGCCCCGATTAACAAAGGGCCAGAAAAACTTTCTAGTTATGAATCGGGTCTAGAACCAATGGGCGACGCTTGGTTACAATTTCGAATCCGGTATTATATGTTTGCTCTAGTTTTTGTTGTTTTTGATGTTGAAACCGTTTTTCTTTATCCATGGGCAATGAGTTTTGATGTATTAGGGGTATCCGTATTTATAGAAGCTTTCATTTTCATGCTTATCCTAATTGTTGGTTCAGTTTATGCGTGGCAAAAAGGAGCATTAGAGTGGTCTTAG
Boronia ternata	OL591162	0.619	0.4945	61	atpE	ATGACCTTAAATCTTTGTGTACTGACCCCGAATCGAATTGTTTGGGATTCAGAAGTGAAAGAAATCATTTTATCGACTAATAGTGGACAAATAGGCGTATTACCAAACCATGCGCCTATTGCGACAGCTGTAGATATAGGCATTTTAAGAATTCGCTTTAACGACCAATGGGTAACGATGGCTCTGATGGGTGGTTTTGCTAGAATAGGGAATAATGAGATCACTATTTTAGTAAATGATGCGGAGAAGAGTAGTGACATTGATCCCCAAGAAGCCCAGCAAACTCTTGAAATAGCAGAAGCTAATTTGAGGAAAGCTGAAAGCAAGAGACAAACAATTGAGGCAAATCTAGCTCTCAGACGAGCTAGGACACGAGTAGAGGTTATCAATGCGATTTGA
Boronia ternata	OL591162	0.5092	0.4673	51.5325	atpB	ATGAGAATAAATCCTACTACTCCTGGCCCTGGGGTTTCCGCTCTTGCAAAAAAAAACCTGGGGCATATCGCTCAAATCATTGGTCCGGTACTGGATGTAGGCTTTCCCCCCGGGAAGATGCCTAATATTTACAATGCTCTAGTAGTTAAGGGTCGAGATACTGTCGGTCAACCAATTAATGTGACTTGCGAGGTACAGCAATTATTAGGGAATAATCGGGTTAGAGCTGTAGCCATGAGTGCTACAGATGGTCTAACGAGAGGGATGGAAGTAATTGACACGGGAGCTCCTCTAAGTGTTCCAGTCGGCGGAGCGACTCTAGGACGAATTTTCAACGTCCTTGGAGAGCCTGTTGATAATTTAGGTCCTGTCGATACTCGCACAACATCCCCTATTCAT…
Boronia ternata	OL591162	0.4805	0.4161	50.7406	rbcL	ATGTCACCACAAACAGAGACTAAAGCGAGTGTTGGATTCAAAGCCGGTGTTAAAGATTATAAATTGACTTATTATACTCCTGACTATGTAACCAAAGATACTGATATCTTGGCAGCATTCCGAGTAACTCCTCAACCCGGAGTTCCGCCCGAGGAAGCGGGGGCTGCAGTAGCTGCGGAATCTTCTACCGGTACATGGACAACTGTGTGGACCGATGGGCTTACCAGCCTTGATCGTTACAAAGGGCGATGCTACAACATTGAGCCCGTTGCTGGAGAAGAAAATCAATATATATGTTATGTAGCTTACCCGTTAGACCTTTTTGAAGAAGGCTCTGTTACTAACATGTTTACTTCCATTGTGGGTAATGTATTTGGTTTCAAAGCCCTGCGCGCTCTA…
Boronia ternata	OL591162	0.5278	0.3608	46.4567	accD	ATGAAAAAAGGGTGGTTCAATTCGATGTTATCTAAGGGTAAAAGGGAATTAGGATACAGGTGTGGGTTAAGTAAATCAATGGATAGTTTTGGTCCTATTAAAAATACCAGTGTAAGCGAGTACTCAATTCGAAATGCTAAGGATAAAAACATTCATAGTTCGAGTGATAGTGACTGTTCGAGTTACAGCAATTTAGCTGGTGTCAGGGACATTCGTAATTTCATCTCAGATGACACCTTTTTTGTTGAGGATAGTAATAGGGACAACTATTCGATATATTTTGATATTGAAAATCTAATTTTGGAAATAGACAATGATCATTCTTTGATGAGTAAACTAGAAAGTTCTTTTTATAGCTTTCGTAATTATAGTTCTAGGAATACTGGATCAAAAAGTGAT…
Boronia ternata	OL591162	0.5	0.4615	61	psaI	ATGACAATTCTCAACAGTTTTCCCTCTATTTTAGTCCCCTTAGTAGGCCTAGTATTTCCGGCAATGGCAATGGCTTCGTTATTTCTTTATCTTGAAAAAAATAAGATTTTTTAA
Boronia ternata	OL591162	0.5303	0.4286	49.7926	ycf4	ATGAGTTGGCGATCAGAATATATATGGATAGAATCCATAGCGGGCTCTCGCAAAACAAGCAATGTCTGCTGGGCCCTTATCCTTTTTTTAGGTTCATTAGGATTCTTAGTGGTTGGAATTTCTAGTTATCTTAATAGGAATTTGCTATCTTTATTTCCGTCTCAGCAAATAAATTTTTTTCCACAAGGGATTGTGATGTCTTTCTACGGGATCGCGGGTCTCTTTATTAGTTCCTATTTGTGGTGCACAATTACATGGAATGTAGGTAGCGGTTATGATCGATTTGATACAAAAGAGGGAATAGTGTGTATTTTTCGTTGGGGATTTCCTGGAAAAAATCGCCGCATCTTTCTACGATTCCTTATGAAAGATATTCAGTCCATCAGAATAGAAGTTAAA…
Boronia ternata	OL591162	0.5342	0.4061	61	cemA	ATGACAAAAAAAAAGAACGCATCCATTCCACTTAGATATCTTTCATCTATAGTATTTGTAGTATTTTTGCCCTGGTGGATCCCTCTCTCATTTAATAAAAGTCTGGAATCCTGGGTTACTCATTGGTGGAATACTAGTCAACCCGAAACCTTTTTGAATGATATTCAAGAAAAGCCTATTCTAGAAAAATTCATAGAATTAGAGGAATTATTCCTCTTGGACGAAATGATAACGGAATTTCCGGAAAGACGTCTAGAAAAGTTTCGTATAGGGCTAGGGCTCCCGAAAGAAACAATTCAATTAATCAAGATGCACGATGAGGATCATATCCATACGATTTTTCACTTCTCGACAAATACAATCTGCTTCGTTATTCTAAGTGGTTATTCGATTCTGTGT…
Boronia ternata	OL591162	0.5596	0.4387	58.2742	petA	ATGCAAATTCGAAATACCTTTTCTTCGTTAAGGGGAGAGATTACTCGATTCATTTCCGTATCCCTCATGATATATATAATAACTCGGGCATCGATTTCAAATGCATATCCCGTTTTTGCGCAGCAAGGTTTTGAAAATCCACGAGAGGCAACTGGTCGCATTGTATGCGCCAACTGTCATTTAGCTAATAAGCCCGTGGATATTGAGGTTCCACAGGCGGTACTCCCTGATACTGTATTTGAAGCAGTTGTTAGAATTCCCTATGATATGCAACTAAAACAAGTTCTTGCTAATGGTAAAAAGGGGTCTTTGAACGTGGGGGCTGTTCTTATTTTACCGGAGGGGTTTGAATTAGCCCCCCCCGACCGTATTTCGCCCGAGATGAAAGAAAAGATAGGC…
Boronia ternata	OL591162	0.5385	0.3571	61	psbJ	ATGGCCGATACTACTGGAAGGATTCCCCTTTGGATAATAGGTACTGTAACTGGTATTATAGTGATTGGTTTAATAGGCATTTTCTTTTATGGTTCATATTCCGGATTAGGTTCGTCCTTGTAG
Boronia ternata	OL591162	0.3125	0.4783	61	psbL	ATGACACAATCAAACCCGAACGAACAAAATGTTGAATTGAACCGTACCAGCCTCTACTGGGGGTTATTACTCATTTTTGTACTTGCTGTTTTATTTTCCAATTACTTTTTCAATTAA
Boronia ternata	OL591162	0.6	0.6	55.2727	psbF	ATGACCATAGATCGAACCTATCCAATTTTTACAGTGCGATGGTTGGCTGTGCACGGACTAGCTGTACCTACCGTTTCTTTTTTGGGGTCAATATCAGCAATGCAGTTCATCCAACGATAA
Boronia ternata	OL591162	0.4074	0.4035	53.436	psbE	ATGTCTGGAAGCACAGGAGAACGTTCTTTTGCTGATATTATTACCAGTATTCGATACTGGGTCATTCATAGCATTACTATACCTTCCCTATTCATTGCGGGTTGGTTATTTGTCAGCACGGGGTTAGCTTACGATGTGTTTGGAAGCCCTCGTCCAAACGAGTATTTTACAGAGAGCCGACAAGGAATTCCATTAATAACCGGACGTTTTGATTCTTTGGAACAACTCAACGAATTTAGTAGATCTTTTTAG
Boronia ternata	OL591162	0.7143	0.36	40.1892	petL	ATGCCTACTATAACTAGTTATTTTGGGTTTCTCCTAGCAGCTTTAACTATAACCTCGGTTCTATTTATTGGTCTGAGTAAGATAGGACTTATTTGA
Boronia ternata	OL591162	0.3636	0.4643	61	petG	ATGATTGAAGTCTTTCTATTTGGAATCGTCTTAGGTCTAATTCCTATTACTTTGGCTGGATTATTCGTAACCGCATTTTTACAATACAGACGTGGTGATCAGTTGGACCTTGATTAA
Boronia ternata	OL591162	0.6111	0.6296	61	psaJ	ATGCGAGATCTAAAAACATATCTTTCCGTGGCACCGGTACTAAGTACTCTATGGTTCGGATCTTTAGCAGGGTTATTGATAGAAATCAACCGTTTGTTCCCGGACGCATTGACATTTCCGTTTTTTTCATTCTAG
Boronia ternata	OL591162	0.619	0.4375	55.1085	rpl33	ATGGCCAAGGGTAAAGATGTCCGAGCAAGGGTTATTTTGGAATGTACTCGTTGTGTTCGAAACGGTGTTAATAAGGAATCAAGGGCAAGGGGTATTTCCAGATATATTACTCAAAAGAATCGACACAATACACCTAGTCGATTGGAATTGAGAAAATTCTGTCTCTATTGTTACAAACATACACTTCATGGGGAGATAAAAAAATAG
Boronia ternata	OL591162	0.5926	0.4933	61	rps18	ATGGATAAAACCAAGCGGCTCTTTCTTAAATCCAAGCGATCTTTTCGTAGGCGTTTGCCCCCGATTGTATCGGGGGATCGAATTGATTATAGAAACATGACTTTAATTAGTCGATTTCTTAGTGAACAAGGAAAAATATTATCTAGACGCGTGAATAGATTGACCTTAAAAGAACAACGATTAATTACTATTGCTATAAAACAAGCCCGTATTTTATCTTCGTTACCTTTTCTTAATAATGACAAACAATTTGAAAGAAGTGGGTCGACCACTAGAACTCCAGGTCTTCGAACCAGAAAAAAATAG
Boronia ternata	OL591162	0.6667	0.4886	61	rpl20	ATGACCAGAATTAGACGAGGATATATAGCTCGGAGACGTAGAACAAAAATGCGTTTATTTGCATCAAGCTTTCGCGGGGTTCATTCAAGACTTAGTCGAACAATTACTCAACAGAAAATCAGAGCTTTGGTTTCAGCTCATCGTGATAGCGATAGACAAAAAAGGGGTTTTCGTCGTTTGTGGATCACACGAATAAATGCAGTAATTGGCGGAAAGGGGGTATCCTATATTTATAGCATATTAATAAAAAATCTGTATAAGGCGCAGTCGGTTCTTAATCGTAAGATACTTGCACAAATAGCTATATCAAATAGGAATTGTCTTTATATGATTTCCAATGAGATTTTAAAATAA
Boronia ternata	OL591162	0.3898	0.4667	59.0608	rps12	CTACAACGCACTAGAACGCCCTTGTTGACGATCCTTTACTCCGACAGCATCTAGGGTTCCTCGAACAATGTGATATCTCACACCGGGTAAATCCTTAACCCTCCCCCCTCTTACTAAGACTACAGAATGTTCTTGTGAATTATGGCCAATACCAGGTATATAAGCAGTGATTTCAAACCCAGAGGTTAATCGTACTCTGGCAACTTTACGTAAGGCAGAGTTTGGTTTTTTGGGGGTGATAGTATGCCGACTATTAAACAACTTATTAGAAACCCAAGACAGCCAATCAGAAACGTTACAAAATCCCCCGCTCTTGGGGGATGCCCTCAGCGCCGAGGAACATGTACAAGGGTGTAT
Boronia ternata	OL591162	0.5352	0.504	61	clpP1	ATGCCTATTGGTGTTCCAAAAGTACCTTATCGAAGTCCCGGGGACAAGCATCCATCTTGGGTTGACATCAACCGACTTTATCGAGAAAGATTACTTTTTTTAGGTCAAATGGTTGAGAGCGATATCTCGAATCAACTTATTGGTATTATGGTATATCTCAGTATAGAGAACGAGACCAAGGATTTGTATTTATTTATAAACTCTCCGGGCGGATGGGTAATACCCGGAATAGCAATTTATGATACTATGCAATTTGTGCGACCAGATGTACAGACAATATGCATGGGATTGGCCGCCTCCATGGGGTCTTTTCTCCTGGCCGCAGGAGCAAGTACCAAACGTCTAGCATTCCCTCACGCTAGGGTCATGATCCATCAACCTTTTGGCGCTTTTTATGGG…
Boronia ternata	OL591162	0.5	0.4155	47.7545	psbB	ATGGGTTTGCCTTGGTATCGTGTTCATACCGTCGTATTGAATGATCCCGGCCGTTTGATTGCTGTCCATATAATGCATACAGCCCTGGTTGCGGGTTGGGCCGGTTCAATGGCTCTATATGAATTAGCTGTTTTTGATCCCTCCGATCCAGTTCTTGATCCAATGTGGAGACAAGGCATGTTCGTTATACCCTTCATGACTCGTTTAGGAATAACCGATTCATGGGGCGGTTGGAGTATTACCGGGGGGACGGTAACCAATCCGGGTATTTGGAGTTATGAAGGTGTAGCCGGGGCGCATATTGTATTTTCGGGTTTGTGCTTCTTGGCAGCTATCTGGCATTGGGTGTATTGGGATCTAGCAATATTTGTCGATGACCGTACGGGAAAACGGTCTTTA…
Boronia ternata	OL591162	0.3636	0.5652	44.75	psbT	ATGGAAGCATTGGTTTATACATTCCTCTTAGTCTCGACTCTAGGAATCATCTTTTTCGCTATCTTTTTTCGAGAACCGCCTAAAGTTCCAACTAAAAAATGA
Boronia ternata	OL591162	0.4118	0.5556	61	psbN	ATGGAAACAGCAACCCTAGTCGCCATCTCTATATCTGGGTTACTTGTAAGTTTTACTGGGTACGCCTTATATACTGCTTTTGGGCAACCCTCTCAACAACTAAGAGATCCATTCGAGGAACACGGGGACTAG
Boronia ternata	OL591162	0.8	0.4286	61	psbH	ATGGCTGCACAAACAGTTGAGGGTAGTTCTAGAACTCGTCCAAAAATGACTTCCGCAGGGGGGTTATTGAAACCTTTGAATTCGGAATATGGTAAAGTAGCTCCTGGATGGGGAACTACTCCTTTGATGGGTATCGCAATGGCGCTATTTGCGATATTCCTGTCTATTATTTTAGAGATTTATAATTCGTCCGTTTTACTGGACGGAATTTCAATGAATTAG
Boronia ternata	OL591162	0.5556	0.4306	56.103	petB	ATGAGTAAAGTCTACGATTGGTTCGAAGAACGTCTCGAGATTCAGGCGATTGCAGATGATATAACTAGTAAATACGTTCCTCCTCATGTCAACATATTTTATTGTCTAGGAGGAATTACGCTTACTTGTTTTTTAGTACAAGTAGCTACAGGGTTTGCTATGACTTTTTACTACCGTCCGACCGTTACTGAGGCCTTTGCTTCTGTTCAATACATAATGACAGAAGCTAACTTTGGTTGGTTAATCCGATCAGTTCATCGATGGTCGGCAAGTATGATGGTCCTAATGATAATCCTGCACGTATTTCGTGTGTATCTCACCGGCGGTTTTAAAAAACCTCGCGAATTGACTTGGGTTACAGGCGTGGTTCTGGCTGTGTTGACGGCATCTTTTGGTGTA…
Boronia ternata	OL591162	0.6222	0.5	45.5663	petD	ATGGGAGTAACAAAAAAACCTGACTTGAACGATCCTGTATTAAGGGCTAAGTTGGCTAAAGGTATGGGTCATAATTATTATGGAGAACCCGCGTGGCCCAACGATCTTTTATATATTTTTCCAGTAGTAATTCTAGGTACTATTGCATGTAACGTAGGCTTAGCGGTTCTAGAACCATCAATGATTGGTGAACCCGCGGATCCGTTTGCAACTCCTTTGGAAATATTACCTGAATGGTATTTCTTTCCTGTATTTCAAATACTTCGTACAGTACCCAATAAGCTGTTGGGTGTTCTTTTAATGGTTTCAGTACCTGCGGGATTATTAACAGTACCTTTTTTGGAAAATGTTAATAAATTCCAAAATCCATTTCGCCGGCCAGTAGCGACAACCGTCTTT…
Boronia ternata	OL591162	0.4898	0.4957	53.731	rpoA	ATGGTTCGAGAGAAAGTCAAAGTATCTACTCGTACACTACAGTGGAAGTGTGTTGAATCAAGAGCAGACAGTAAGCGTCTTTCTTATGGACGCTTCATTTTGTCTCCACTTATGAAAGGTCAAGCCGACACAATAGGCAGTGCGATGCGAAGAGTTTTGCTTGGAGAAATAGAAGGAACGTGTATTACACGCGCAAAATCTGAGAAAATCCCACATGAATATTCTACCATAGTGGGTATTCAAGAATCGGTACATGAAATTTTAATGAATTTGAAAGAAATTGTATTGAGAAGTAATCTTTATGGAACTTGTGACGCACTTATTTGTGTCAAAGGTCCCGGATATGTAACTGCTCAAGACATCCTCTTGCCACCTTCTGTAGAAATCGTTGATAAGACG…
Boronia ternata	OL591162	0.6053	0.4851	61	rps11	ATGGCAAAATCTACACCAAGAAGTGGTTCACGTAGGACTGGACGGATTGGTTTGCGTAAAAGTGGACGTCGAGTACCAAAGGGCGTTATTCATGTTCAAGCAAGTTTCAACAACACCATTGTGACTGTTACGGATGTACGGGGTCGGGTAATTTCTTGGTCCTCGGCCGGTACTTGTGGATTTAGGGGTACAAGAAGAGGTACGCCCTTTGCTGCTCAAACAGCAGCAGGAAGTGCTATTCGGGCAGTAGCGGATCAAGGTATGCAACGAGCAGAAGTCATGATAAAAGGTCCTGGTCTGGGAAGAGATGCAGCATTACGAGCTATTCGTAGAAGCAGTATCCTTTTAAATTTCGTACGGGATGTAACCCCTATGCCACATAATGGTTGCAGACCCCCT…
Boronia ternata	OL591162	0.5833	0.6538	42	rpl36	ATGAAAATAAGAGCTTCCGTTCGGAAAATTTGTGAAAAATGTCGACTGATCCGCAGGAGGGGACGGGTTATAGTAATTTGTTCCAACCCGAGACATAAACAAAGACAAGGATAA
Boronia ternata	OL591162	0.5682	0.5385	61	rps8	ATGGGCAAGGACACTATTGCTGACATAATAACTTATATACGAAATGCTGATCTGAATCGAAAAGGAACGGTTCGAATAGCATATACTAACATCGCCGAAAACCTTGTTAAAATACTTTTGCGAGAGGGTTTTATAGAAAACGTCAGGAAACTCGTGGAAAACAAAAAAGAGTTTTTGGGTTTAACCCTACGACATAGAAAGAATAGGAAAGGACCGTATAGGCCGATTTTCAATTTAAAACGAATCAGTCGCCCCGGTCTACGAATATATTCTAACTATAAAGGAATTCCTAGAATTTTAGATGGGATGGGGATTGTAATTCTATCTACTTCGCGGGGTATAATGACAGAACGGGCGGCTCGACTAGAAAGAATCGGCGGAGAAATTTTGTGTTATATA…
Boronia ternata	OL591162	0.5	0.4725	61	rpl14	ATGATTCAACCTCAAACCCTTTTGAATGTAGCGGACAATAGTGGTGCCCGAGAATTGATGTGTATTCGAATCATAGGAGCCAGTAATCGTGAATATGCTCATATTGGTGACGTTATTGTTGCTGTGATCAAGGAAGCAATACCAAATATGCCTTTAGAAAGATCCGAAGTGATCAGAGCTGTAATTGTACGCACTTGTAAAGAACTCAGACGGGATAACGGTATGATAATACGTTATGATGACAATGCTGCAGTTATCATTGATCAAGAAGGAAATCCAAGGGGAACTCGAGTTTTTGGTGCGATCGCCCGAGAATTGAGACATTTGAATTTTACTAAAATAGTTTCATTAGCGCCTGAAGTATTATAA
Boronia ternata	OL591162	0.5	0.5842	61	rpl16	ATGCTTAGTAACCCAAAAAGAACAAGATTCCGTAAACAACATAGAGGAAGAATGAAAGGAATATCTTATCGAGGTAATCGTATTTGTTTCGGCAGATATGCTCTTCAAGCACTTGAACCCGCTTGGATCACATCTAGACAAATCGAAGCAGGGCGACGCGCAATGACACGAAATGTACGGCGTGATGGAAAAATATGGGTACGTATATTTCCAGACAAACCTGTTACAGTAAGACCCACAGAAACCCGTATGGGGTCTGGGAAAGGATCCCCTGAATATTGGGTAGCCGTCGTTAAACCGGGTAGAATACTTTATGAAATGAGCGGAGTCGCTGAAAATATCGCTCGAAAAGCTATTTCAATAGCGACGTCGAAAATGCCTATAAGAACTCAATTCATT…
Boronia ternata	OL591162	0.4318	0.5989	43.3636	rps3	ATGGGACAAAAAATAAATCCACTTGGTTTCCGACTTGGTACAACACAAAGTCATCATTCGCTTTGGTTTGCAGCAAAACAAAAAAATTATTGCGAAGGTCTACAAGAAGATCAAAAAATACGAAACATTATTCAGAATTATGTACAAAAAAATATGAGAATATCCTCCGGTGTTGAGGGAATTGCCTGGATAGAGATTCAAAAAAGAATTGATCTAATTCAAGTCATAATATATATAGGATTCCCAAAATTATTACTAGAAAATAGACCGCGAAGAATTGAAGAATTACAGATGAATGTACAAAAAGAACTTAATTGTGTGAACCGAAAAATAAACATTGCTATTACAAGAATTGGAAATCCTTATGGACACCCCAATATTCTTGCCGAATTTATCGCC…
Boronia ternata	OL591162	0.475	0.4778	61	rpl22	ATGATAAGGATAATAAAGAAAAAGGTAGAAGTATCTGCTTTAGGTAAACATATATGTATGTCTGCTCACAAAGCCCGAAGGGTAATTGATCCGATTCGTGGACGTTCTTACGAGGAAGCCCTTATGATACTCGAACTCATGCCTTATCGAGCATGTTATCCCATTAACAAATTGGTTTATTCTGCAGCAGCAAATGGTATTCACAATCTGGGTTTCAACGAAGCGAGTTTATTCATTATTAAAGCCGAAGTAAACGAGGGTCCTACTGCGAAAAGATTAAAACCTCGAGCTCGAGGGCGGAGTTCTATGAACAAAAGACGCACTTGTCATATAACTATTGTTTTAAAAGATATCTCATTAGATGAATATAGGGACTATCTCGACTGCTAA
Boronia ternata	OL591162	0.56	0.5	49.7128	rps19	GTGACACGTTCACTAAAAAAAAATCCTTTTGTAGTGAATCATTTATTAAGAAAAATCGATAAGCTTAATACAAAAGCGGAAAAAGAAATAATAATAACTTGGTCCCGGGCATCTACCATTATACCCACAATGGTGGGCCATACTATTGCTATCCATAATGGAAGGGAGCATTTGCCTATTTATATAACAGATCGTATGGTAGGACATAAATTGGGAGAATTTGCGCCCACTATCAATTTCCGTGTACATGCAAAAAACGATAATAGATCCCGTCGTTAA
Boronia ternata	OL591162	0.5	0.4973	54.4367	rpl2	ATGGCGGTACATTTATACAAAACTTCTACCCCGAGCACACGCAATGGAGCCGTAGACAGTCAAGTGAAATCCAATCCACGAAATAATTTGATCTATGGACAGCATCGTTGTGGTAAAGGTCGTAATGCCAGAGGAATCATTACCGCAGGGCATAGAGGGGGAGGTCATAAGCGTCTATACCGTAAAATCGATTTTCGACGGAAGGAAAAAGACATATATGGTAGAATCGTAACCATAGAATACGACCCTAATCGAAATGCATACATTTGTCTCATACACTATGGGGATGGTGAGAAGAGATATATTTTACATCCCAGAGGGGCTATAATTGAAGATACCATTGTTTCTGGTACAGAAGTTCCTATAAAAATGGGAAATGCCCTACCTTTGACCGATATG…
Boronia ternata	OL591162	0.5714	0.5152	61	rpl23	ATGGATGGAATCAAATATGCAGTATTTACAGACAAAAGTATTCGGTTATTGGGGAAAAATCAATATACTTCTAATGTCGAATCAGGATCAACTAGGACAGAAATAAAGCATTGGGTCGAACTCTTCTTTGGTGTCAAGGTAATAGCTATGAATAGTCATCAACTCCCCCGAAAGGATAGAAGAATGGGACCTATTATGGCACATACAATGCATTACAGACGTATGATCATTACACTTCAACCGGGTTATTCTATTCCACCTCTCAGAAAGAAAAGAACTTAA
Boronia ternata	OL591162	0.5302	0.4402	53.2982	ycf2	ATGAAAGGACATCAATTAAAATCCTGGATTTTCGAATTGAGAGAGATATTGAGAGAGATCAAGAATTCTCACTATTTCTTAGATTCATGGACCCAATTCAATTCAGTGGGATCTTTCATTCACATTTTTTTCCACCAAGAACGTTTTATAAAACTCTTGGACCCACGAATTTGGAGTATCCTACTTTCACGCAATTCACAGGGTTCAACAAGCAATCGATATTTCACGATCAAGGGTGTAGTACTATTTGTAGTAGCGATCCTTATATATCGTATTAACAATCGAAATATGGTCGAAAGAAAAAATCTCTATTTGACAGGGCTTCTTCCTATACCTATGAATTCCATTGGACCCAGAACTGATACATTGGAAGAATCTTTTGAGTCTTCCAATATCAAT…
Boronia ternata	OL591162	0.5714	0.6875	49.5714	ycf15	ATGCTACTGCTGAAACATAGAAGAATTGAAATCTTAGATCAAAACACTATGTATGGATGGTATGAACTGCTTAAACAAGAATTCTTGAACAGCGAACCACCAGAGCTATTACTAACTACATCAAAAGATTTCCATTAA
Boronia ternata	OL591162	0.4242	0.4566	51.695	ndhB	ATGATCTGGCATGTACAGAATGAAAACTTCATTCTCGATTCTACGAGAATTTTTATGAAAGCCTTTCATTTGCTTCTCTTCGATGGAAGTTTTATTTTCCCAGAATGTATCCTAATTTTTGGCCTAATTCTTCTTCTGATGATCGATTCAACCTCTGATCAAAAAGATATACCTTGGTTATATTTCATCTCTTCAACAAGTTTAGTAATGAGCATAGCGGCCCTATTGTTCCGATGGAGAGACGAACCTATGATTAGCTTTTCGGGAAATTTCCAAACGAACAATTTCAACGAAATCTTTCAATTTCTTATTTTACTATGTGCAACTCTATGTATTCCTCTATCCGTGGAGTACGTTGAATGTACAGAAATGGCTATAACAGAGTTTCTGTTATTCGTA…
Boronia ternata	OL591162	0.4872	0.5812	44.3734	rps7	ATGTCACGTCGAGGTACTACAGAAGAAAAAGCTGCAAAATCCGATCCAATTTATCGTAATCGCTTAGTTAACATGTTGGTTAACCGTATTCTGAAACACGGAAAAAAATCATTGGCTTATCAAATTATCTATCGAGCCTTGAAAAAGATTCAACAAAAGACAGAAAAAAATCCACTATCCGTTTTACGTCAAGCAATACGTGGAGTAACTCCCGATATAGCAGTAAAAGCAAGACGTGTAGGCGGATCGACTCATCAAGTTCCCATTGAAATAGGATCCGCACAAGGAAAAGCACTTGCCGTTCGTTGGTTATTAGGGGCATCCCGAAAACGTCCGGGTCAAAATATGGCTTTCAAATTAAGTTCCGAATTAGTGGATGCTGCCAAAGGGAGTGGCGAT…
Boronia ternata	OL591162	0.7333	0.5116	32.1954	rpl32	ATGCCAGTTCCAAAAAAACGTACTTCTACATTAAAAAACCATATTCGTAAGAATATTTGGAAAAGGGGAGGGTATTGCGCAACATTGAAGTCTTTTTCCGTATCGAAATCCCGTTCTATTGGGAATTCAAAAAGTTTTTTTGTAAAACAAATAAATAAGAAAACTTTGGAATAA
Boronia ternata	OL591162	0.5158	0.4762	53.5631	ccsA	ATGATCTTTTCAACGTTAGAGCATATATTAACGCATATATCCTTTTCGGTCGTTTCAATTGGAATTCCAATATATTTACTAACCTTATTAGTCGATGAAATAAGAGGACTATATGATTCATCAGAAAAGGGGATGATAGCTACCGCTTTCTGTCTAACAGGATTATTAATCACCCGTTGGATTTACTCGAGGCATTTCCCATTAAGTGATTTATATGAGTCATTAATCTTTCTTTCATGGAATTTCTCCATTATTCATAGGATTTTTTATTTTAAAAATAATAAAAACCATTTAAGCGCTATAACGGGACCAAGTGCTATTTTTACCCAAGGCTTTGCGACTTCAGGTTTTTTAACTAATAAAATCCATCAATCCGGAATATTAGTACCTGCTCTCCAA…
Boronia ternata	OL591162	0.5247	0.4567	51.2726	ndhD	ATTGTAGTTTTTCCAATAGCCGCGGGTTCTTTAATTTTTTTTCTTCCTCATAGAGGAAATAAGGTGACTAGAGGATATACAATATATATATGTGTCTTAGAACTCCTTATAACGACCTATGCATTCTGTTCTAATTTCCAATTGGACGATCTATTAATCCAGCTGGACGAGGATGATAAATGGATCACCTTTTTTGATTTTGACTGGCGGTTGGGAATAGATGGACTGTCCATAGGACCTATTTTACTGACGGGATTTATCACTACTTTAGCTACTGTCGCGGCTCGGCCAGTTACTCGGAATTCCCGGCTATTCCATTTCCTGATGTTAGCGATGTACAGTGGTCAAATAGGATCATTTTCTTCTCGAGACCTTTTACTTTTTTTCATCATGTGGGAA…
Boronia ternata	OL591162	0.5909	0.4833	61	psaC	ATGTCACATTCAGTAAAGATTTATGATACATGTATAGGGTGTACTCAATGTGTCCGAGCCTGTCCCACAGATGTATTAGAAATGATACCTTGGGGCGGATGTAAAGCAAAGCAAATTGCTTCTGCTCCAAGAACAGAGGATTGTGTTGGTTGTAAGCGATGCGAATCCGCATGCCCAACGGATTTCTTGAGTGTTCGGGTTTATTTATGGCATGAAACAACTCGAAGCATGGGTCTAGCTTATTGA
Boronia ternata	OL591162	0.4839	0.3803	61	ndhE	ATGATGCTCGAACATGTACTTGTTTTGAGTGCCTATTTATTTTCTATTGGTACCTACGGATTGATTACGAGCCGAAATATAGTTCGGGCCCTGATGTGTCTTGAACTTATACTAAATGCAGTTAATATCAATTTCGTAACATTTTCTTATTTTTTTGATAGTCGACAATTAAAAGGAGACATTTTCTCAATTTTTGTTATCGCTATTGCAGCCGCCGAAGCAGCTATCGGATCAGCTATTGTTTCGTCAATTTATCGTAACAGAAAATCGACTCGTATCAATCAATCGACTTTGTTGAATAAGTAG
Boronia ternata	OL591162	0.5	0.3876	58.5389	ndhG	ATGGATTTGCCTGGACCAATACATGATTTTCTTGTAGTTTTTCTGGGATCAGGTCTTATATTAGGAGGTCTAGGGGTGGTATTATTTAGCAACCCCATTTATTCTGCCTTTTCCTTGGGATTGGTTCTTGTTTGTATATCCTTATTCTATATTCTATCAAATTCACATTTTGTAGCTGCCGCGCAGCTCCTTATTTACGTGGGAGCTGTAAACGTTTTAATCATATTTGCTGTAATGTTCATGAATGGTTCAGACTATTACAAAGATTCGAATGAAAATCTTTGGACTGTTGGTCACGGACTTACTTCCGTGGTTTGTACAAGTCTTTTTTTTTCGCTAATCGCTACTATTCTAGATACGTCGTGGTACGGGATTATTTGGACTACACGACCCAATCAA…
Boronia ternata	OL591162	0.5588	0.4254	55.9466	ndhI	ATGTTTCCTATGGTAATTGGTTTCATGAATTATGGTCAACAAACAATACGAGCTGCAAGGTACATCGGTCAAGGTTTCATGATTACTTTATCCCAAGCAAATCGTTTACCTGTAACTATTCAATATCCTTATGAAAAATTAATGACATCGGAGCGTTTTCGCGGTCGAATCCATTTTGAATTTGATAAATGTATTGCTTGTGAAGTATGCGTTCGCGTATGTCCTATAGATCTGCCTGTTGTTGATTGGAAATTTGAAACAGATATTCGAAAGAAACGATTACTTAATTACAGTATTGATTTTGGAATTTGTATTTTTTGTGGTAACTGTGTTGAGTATTGTCCAACAAATTGTTTATCAATGACTGAAGAATATGAACTTGCTACTTACGACCGTCAC…
Boronia ternata	OL591162	0.4651	0.5108	49.9318	ndhA	ATGATAATTGATACAACAGAAGTACAAGATATCAATTCTTTTTCCAGATTGGAATCCCTACAAGAGGTCTATGGCATCATGTGGATGCTTGCCCCTATTTTGACTCCTGTAGTGGCAATCACAACGGGTGTCCTAGTAATTGTGTGGTTAGAAAGAGAAATATCCGCAGGAATACAACAACGTATTGGGCCTGAATATGCCAGTCCCTTGGGAATTCTTCAAGCTTTAGCAGATGGGACAAAACTACTTTTCAAAGAAAACCTTCTTCCATCTAGAGGAAATAGTAGTTTATTCAGTATTGGACCATCTATATCAGTCATAGTAATTCTACTAAGTTCTTCAGTAATTCCTTTTAGTTATAACCTAGTTTTAGCTGACCTTAATATCGGTATTTTTTTA…
Boronia ternata	OL591162	0.5804	0.4894	51.1855	ndhH	ATGAGTCTACTAGCTACAGAAAAAGAATTTATGATAGTCAATATGGGACCTCACCACCCCTCAATGCACGGTGTTCTTCGTCTCATCGTTACGCTAGATGGTGAAGATGTTATTGACTGTGAACCAATATTGGGTTATTTACACCGAGGGATGGAAAAAATTGCGGAAAACCGAACAATTATACAATATCTGCCTTATGTAACCCGTTGGGATTATTTAGCTACTATGTTCACCGAAGCAATAACTGTAAATGGACCCGAACTGTTGGGAAACATTCAAGTACCCAAAAGGGCCAGCTATATCCGAGTAATTATGTTGGAGTTGAGTCGTATAGCTTCCCATCTGTTATGGCTTGGCCCTTTTATGGCAGATATTGGTGCACAGACTCCTTTCTTCTAT…
Boronia ternata	OL591162	0.6667	0.6269	51.9468	rps15	ATGGTAAAAAAACCATTCGTATTAGTTATGGTTCAAGAAAAAAAAGAAGAAAACTGTGGGTCGGTTGAATTTCAAGTATTCCGTTTCACTAATAAGATACGGAGACTTACTTCACATTTAGAATTGCACAGAAAAGACTATTTATCTCAAAGGGGTCTACGTAAAATTTTGGAAAAACGGCAACGTCTACTAGCATATTTGTCAAAGAAAAATAGAGTACGCTATAAAGAATTAATTAGTAAGTTGAATATTCGGGAGTCAAAAAACCGTTAA
Boronia ternata	OL591162	0.5248	0.5168	48.3326	ycf1	ATGATTGTTCAATCTTTTATACTAGGGAATCGAGTATCCTTATGCATGAAGATAATCAATTCGGTCGTTGTGGTCGGACTCTATTATGGATTTATGACCACATTCTCCATAGGGCCCTCTTATCTCTTCCTTCTCCGAGCTCGGGTTATGGAAGAAGGAACCGAGAAGAAGGTATCAGCAACAACTGGTTTTATTGCGGGACAGCTCATGATGTTCATATCGATCTATTATGCGCCTCTGCATCTAGCATTGGGTAGACCTCATACAATAACTGTCCTAGCTCTACCGTATCTTTTGTTTCATTTCTTCTGGAACAATCCCAAACACTTTTTTGATTATGGATCTACTACCAGACGTAATCGTAGCATTCAATGTGTATTCCTGAATAATCTCATTTTT…
Boronia ternata	OL591162	0.4872	0.5812	44.3734	rps7	ATGTCACGTCGAGGTACTACAGAAGAAAAAGCTGCAAAATCCGATCCAATTTATCGTAATCGCTTAGTTAACATGTTGGTTAACCGTATTCTGAAACACGGAAAAAAATCATTGGCTTATCAAATTATCTATCGAGCCTTGAAAAAGATTCAACAAAAGACAGAAAAAAATCCACTATCCGTTTTACGTCAAGCAATACGTGGAGTAACTCCCGATATAGCAGTAAAAGCAAGACGTGTAGGCGGATCGACTCATCAAGTTCCCATTGAAATAGGATCCGCACAAGGAAAAGCACTTGCCGTTCGTTGGTTATTAGGGGCATCCCGAAAACGTCCGGGTCAAAATATGGCTTTCAAATTAAGTTCCGAATTAGTGGATGCTGCCAAAGGGAGTGGCGAT…
Boronia ternata	OL591162	0.4242	0.4566	51.695	ndhB	ATGATCTGGCATGTACAGAATGAAAACTTCATTCTCGATTCTACGAGAATTTTTATGAAAGCCTTTCATTTGCTTCTCTTCGATGGAAGTTTTATTTTCCCAGAATGTATCCTAATTTTTGGCCTAATTCTTCTTCTGATGATCGATTCAACCTCTGATCAAAAAGATATACCTTGGTTATATTTCATCTCTTCAACAAGTTTAGTAATGAGCATAGCGGCCCTATTGTTCCGATGGAGAGACGAACCTATGATTAGCTTTTCGGGAAATTTCCAAACGAACAATTTCAACGAAATCTTTCAATTTCTTATTTTACTATGTGCAACTCTATGTATTCCTCTATCCGTGGAGTACGTTGAATGTACAGAAATGGCTATAACAGAGTTTCTGTTATTCGTA…
Boronia ternata	OL591162	0.5714	0.6875	49.5714	ycf15	ATGCTACTGCTGAAACATAGAAGAATTGAAATCTTAGATCAAAACACTATGTATGGATGGTATGAACTGCTTAAACAAGAATTCTTGAACAGCGAACCACCAGAGCTATTACTAACTACATCAAAAGATTTCCATTAA
Boronia ternata	OL591162	0.5302	0.4402	53.2982	ycf2	ATGAAAGGACATCAATTAAAATCCTGGATTTTCGAATTGAGAGAGATATTGAGAGAGATCAAGAATTCTCACTATTTCTTAGATTCATGGACCCAATTCAATTCAGTGGGATCTTTCATTCACATTTTTTTCCACCAAGAACGTTTTATAAAACTCTTGGACCCACGAATTTGGAGTATCCTACTTTCACGCAATTCACAGGGTTCAACAAGCAATCGATATTTCACGATCAAGGGTGTAGTACTATTTGTAGTAGCGATCCTTATATATCGTATTAACAATCGAAATATGGTCGAAAGAAAAAATCTCTATTTGACAGGGCTTCTTCCTATACCTATGAATTCCATTGGACCCAGAACTGATACATTGGAAGAATCTTTTGAGTCTTCCAATATCAAT…
Boronia ternata	OL591162	0.5714	0.5152	61	rpl23	ATGGATGGAATCAAATATGCAGTATTTACAGACAAAAGTATTCGGTTATTGGGGAAAAATCAATATACTTCTAATGTCGAATCAGGATCAACTAGGACAGAAATAAAGCATTGGGTCGAACTCTTCTTTGGTGTCAAGGTAATAGCTATGAATAGTCATCAACTCCCCCGAAAGGATAGAAGAATGGGACCTATTATGGCACATACAATGCATTACAGACGTATGATCATTACACTTCAACCGGGTTATTCTATTCCACCTCTCAGAAAGAAAAGAACTTAA
Boronia ternata	OL591162	0.5	0.4973	54.4367	rpl2	ATGGCGGTACATTTATACAAAACTTCTACCCCGAGCACACGCAATGGAGCCGTAGACAGTCAAGTGAAATCCAATCCACGAAATAATTTGATCTATGGACAGCATCGTTGTGGTAAAGGTCGTAATGCCAGAGGAATCATTACCGCAGGGCATAGAGGGGGAGGTCATAAGCGTCTATACCGTAAAATCGATTTTCGACGGAAGGAAAAAGACATATATGGTAGAATCGTAACCATAGAATACGACCCTAATCGAAATGCATACATTTGTCTCATACACTATGGGGATGGTGAGAAGAGATATATTTTACATCCCAGAGGGGCTATAATTGAAGATACCATTGTTTCTGGTACAGAAGTTCCTATAAAAATGGGAAATGCCCTACCTTTGACCGATATG…
Boronia ternata	OL591162	0.56	0.5	49.7128	rps19	GTGACACGTTCACTAAAAAAAAATCCTTTTGTAGTGAATCATTTATTAAGAAAAATCGATAAGCTTAATACAAAAGCGGAAAAAGAAATAATAATAACTTGGTCCCGGGCATCTACCATTATACCCACAATGGTGGGCCATACTATTGCTATCCATAATGGAAGGGAGCATTTGCCTATTTATATAACAGATCGTATGGTAGGACATAAATTGGGAGAATTTGCGCCCACTATCAATTTCCGTGTACATGCAAAAAACGATAATAGATCCCGTCGTTAA
Boronia ternata	OL591162	0.475	0.4778	61	rpl22	ATGATAAGGATAATAAAGAAAAAGGTAGAAGTATCTGCTTTAGGTAAACATATATGTATGTCTGCTCACAAAGCCCGAAGGGTAATTGATCCGATTCGTGGACGTTCTTACGAGGAAGCCCTTATGATACTCGAACTCATGCCTTATCGAGCATGTTATCCCATTAACAAATTGGTTTATTCTGCAGCAGCAAATGGTATTCACAATCTGGGTTTCAACGAAGCGAGTTTATTCATTATTAAAGCCGAAGTAAACGAGGGTCCTACTGCGAAAAGATTAAAACCTCGAGCTCGAGGGCGGAGTTCTATGAACAAAAGACGCACTTGTCATATAACTATTGTTTTAAAAGATATCTCATTAGATGAATATAGGGACTATCTCGACTGCTAA
Brombya platynema	OL591163	0.4615	0.5125	54.089	rps12	ATGCCGACTATTAAACAACTTATTAGAAACCCAAGACAGCCAATCAGAAACGTTACAAAATCCCCCGCTCTTGGGGGATGCCCTCAGCGCCGAGGAACATGTACAAGGGTGTATACTATCACCCCCAAAAAACCAAACTCTGCCTTACGTAAAGTTGCCAGAGTACGATTAACCTCTGGGTTTGAAATCACTGCTTATATACCTGGTATTGGCCATAATTCACAAGAACATTCTGTAGTCTTAGTAAGAGGGGGGAGGGTTAAGGATTTACCCGGTGTGAGATATCACATTGTTCGAGGAACCCTAGATGCTGTCGGAGTAAAGGATCGTCAACAAGGGCGTTCTAGTGCGTTGTAG
Brombya platynema	OL591163	0.3529	0.3277	34.1151	psbA	ATGACTGCAATTTTAGAGAGACGCGAAAGCGAACGCCTATGGGGTCGCTTCTGTAACTGGATAACCAGCACCGAAAACCGACTTTACATTGGATGGTTTGGTGTTTTGATGATCCCTACTTTATTGACCGCAACTTCTGTATTTATTATCGCCTTCATTGCTGCCCCTCCAGTAGATATTGATGGTATTCGTGAACCTGTTTCTGGATCTCTACTTTATGGAAACAATATTATTTCTGGTGCAATTATTCCTACTTCTGCAGCTATAGGTTTGCACTTTTACCCGATATGGGAGGCGGCATCTGTTGATGAATGGTTATATAATGGCGGTCCTTATGAGATAATTGTTCTACACTTCTTACTTGGTGTAGCTTGTTACATGGGTCGTGAGTGGGAACTT…
Brombya platynema	OL591163	0.5444	0.3959	52.982	matK	ATGAAGGAATTGCAAGTCTATTTAGAACTAGATAGATCTCAACAAGACGACTTACTATACCCGCTTCTTTTTCGAGAGTATATTTATGCACTTGCTCATGATCATGGTTTAAATAGTTCGATGATTTCATTGGAAAGTGTGGGTTATGACAATAAATCTAGTTCACTGAGTGTGAAACGGTTAATTACTCGAATGTATCAACCGATTAATTTGAGTATTGCTGCTAATGAGTCTAACAAAAATCCAATTTTTTGGCACAACAGTAAGTTGTATTCTCAAATTATATCAGAGGGATTTGCTGTCGTGGTGGAAATTCCATTTTCCCTATGGTTGGTAGCTTTTTTAGAAGGGAAAGAAATTGAAAAATCTCATAATTTCCAATCAATTCATTCAATATTT…
Brombya platynema	OL591163	0.45	0.4493	52.2689	rps16	ATGGTAAAACTTCGTTTGAAACGATGTGGTAGAAAGCAACGTGCCGTTTATCGAATCGTTGCAATTGATGGTCGATCCCGAAGAGAAGGAAGAGATCTTCGGAAAGTGGGTTTTTATGATCCGATAAATAATCAAACCCATTTAAACGTTCCTGCTATTCTATATTTCCTTGACAAAGGCGTCCAACTTACAAGAACCGTTCATGATATTTCAAAAAAAGCGGGGGTTTTTACAGAACTTAGTCTTAATCAAACGAAATTCTATTAA
Brombya platynema	OL591163	0.4444	0.3182	57.7736	psbK	ATGCTTAATATCTTTCGTTTAATGTATATCTGTCTTAATTCTGCCCTTTATTCGAGTAGTTTTTTATTCGCCAAACTGCCCGAGGCCTACGCTTTTTTGAATCCAATTGTAGATGTTATGCCAGTAATACCTGTTCTATTTTTTCTCTTAGCCTTTGTTTGGCAAGCTGCTGTAAGTTTTCGATGA
Brombya platynema	OL591163	0.25	0.4286	61	psbI	ATGCTTACTCTCAAACTCTTTGTTTACACCGTAGTGATATTCTTTGTTTCTCTCTTCATCTTCGGATTCCTGTCTAATGATCCAGGGCGTAATCCCGGACGCGAAGAATAA
Brombya platynema	OL591163	0.5203	0.4917	49.4246	atpA	ATGGCAACAATTAAAGCCGACGAAATTAGTAATATTATCCGTGAACGTATTGAGCAATATAATAGAGAAGTAAAGATTGTAAATATTGGTACCGTACTTCAAGTAGGCGACGGCATCGCCCGTATTTATGGTCTTGATGAAGTAATGGCAGGTGAATTAGTAGAATTTGAAGAGGGTACAATAGGCATTGCTCTTAATTTGGAATCAAATAATGTTGGTGTTGTTTTAATGGGTGACGGTTTAATGATACAAGAGGGAAGTTCTGTAAAAGCAACCGGAAAAATTGCTCAGATACCGGTAAGCGAGGCTTATTTAGGTCGTGTTATAAATGCCCTGGCTAAACCTATTGATGGTCGAGGTGAAATTTCAGCTTCTGAATCTCGATTAATTGAATCTCCC…
Brombya platynema	OL591163	0.5645	0.4959	56.6651	atpF	ATGAAAAATGTAACCGATTCTTTTGTTTCTTTGATTCACTGGCCATTCGCCGGGAGTTTTGGGTTTAATACCGATATTTTAGCAACAAATCCAATAAATCTAAGTGTAGTGATTGGTGTATTGATCTTTTTTGGAAAGGGAGTGTTAAGTGATTTATTAGATAATCGCAAACGTAGGATCTTAAATAGTATTCGAAATTCAGAAGAACTGCAGGACGGGGCCGTTGAACGGCTGGAAAAAGCCCGGGCCCGGTTACGGAAAGTCGAAATCGAAGCGGATCAGTTTCGAGTGAACGGATATTCTGAGATAGAACGAGAAAAATTCAATTTCATTAATTCAACTTCTAAGACTTTGGACCAATTAGAAAATTACAAAAATGAAACCATTCATTTTGAACAA…
Brombya platynema	OL591163	0.6923	0.375	53.6361	atpH	ATGAATCCACTGATTTCTGCCGCTTCCGTTATTGCCGCTGGGTTGGCTGTTGGACTTGCTTCTATTGGACCTGGAGTTGGTCAAGGCACTGCTGCGGGCCAAGCAGTCGAGGGGATTGCGAGGCAACCCGAGGCGGAGGGAAAAATACGAGGTACTTTATTGCTTAGTCTGGCTTTTATGGAAGCTTTAACAATTTATGGACTGGTTGTAGCCTTAGCGCTTTTATTTGCGAATCCTTTTGTTTAA
Brombya platynema	OL591163	0.4267	0.4393	61	atpI	ATGAATGTTCTATCATGTTCCATCAACACACTAAAGGCGTTATACGATATATCCGGTGTGGAAGTAGGCCAACATTTCTATTGGCAAATAGGCGGGTTCCAAGTCCATGCCCAAGTACTTATTACTTCTTGGGTTGTAATTGCTATCTTATTAGGTTCAGTCTTTCTAGCCGTTCGGAATCCACAAACCGTTCCAACTGCCAGTCAAAATTTCTTCGAATATGTCCTTGAATTCATTCGAGACGTGAGCAAAACTCAGATTGGAGAAGAATATGACCCATGGGTTCCCTTTATTGGAACTATGTTTCTTTTTATTTTTGTTTCGAATTGGTCAGGTGCTCTTTTACCGTGGAAAATCATAGAGTTACCTCATGGGGAGTTAGCCGCACCCACGAATGAT…
Brombya platynema	OL591163	0.5735	0.4556	61	rps2	ATGGCAAGAAGATATTGGAACATCCGTTTGGAAGAGATGATGGAAGCAGGAATTCATTTTGGTCATGGTACTCGGAAATGGAATCCTAGAATGGCACCTTATATATCTGCAAAACACAAAGGTATTCATATTACAAATCTTACTCGAACTGCTCGTTTTTTATCAGAAGCTTGTGATTTAGTTTTTGATGCAGCAAGTAGGGGAAAACTATTCTTAATTGTTGGTACTAAAAATAAAGCAGCTGATTCAGTCGTGCGAGCTGCAATAAAGGCTCGGTGTCATTATGTTAATAAAAAATGGCTCGGTGGTATGTTAACGAATTGGTCCACTACAGAAACGAGACTTCACAAGTTCCGGGATTTGAGAACGGAACAAAAAAAGGGGAGACTTGACAGTCTT…
Brombya platynema	OL591163	0.5779	0.4672	52.2348	rpoC2	ATGGCAGAACGAGTGAGTCTGGTCTTTCACAATAAAATGATAGATGGAACTGCTATTAAACGACTTATTAGCAGGTTAATAGATCACTTCGGGATGGCATATACATCACACATCCTGGATCAAGTAAAGGCCCTGGGTTTCCAGCAAGCCACTGCTACATCTATTTCATTAGGCATTGATGATCTTTTAACGATACCTTCTAAGCGATGGCTAGTCCAAGATGCTGAACAACAAAGTTTGATTTTGGAAAAACACCATCATGATGGGAATGTCCACGCGATAGAAAAACTACGTCAATCCATTGAGATATGGTATGCTACAAGTGAATATTTGCGACAAGAAATGAATCCTAATTTTAGGATGACTGATCCCTTTAATCCAGTCCATATAATGTCTTTT…
Brombya platynema	OL591163	0.6054	0.4665	48.7147	rpoC1	ATGATTGATCGATATAAACATCAACAACTCCGAATTGGATCAGTTTCTCCGCAACAAATAAGCGCTTGGGCCAATAAAATCCTACCTAATGGAGAGATAGTTGGAGAAGTAACAAAACCCTATACTTTTCATTACAAAACCAATAAACCGGAAAAAGATGGATTATTTTGTGAAAGAATTTTTGGGCCTATTAAAAGTGGAATTTGCGCTTGTGGAAATTATCGAATAATCGGAGATGAAAACCCGCAATTTTGTGAACAATGTGGAGTTGAATTTGTTGATTCTCGGATACGAAGATATCAAATGGGATACATAAAACTTGGGTGCCCAGTAACCCACGTGTGGTATTTGAAACGTCTTCCTAGTTATATCGCGAATCTTTTAGATAAACCTCTTAAA…
Brombya platynema	OL591163	0.6139	0.4874	50.255	rpoB	ATGCTCGGAGATGGAAATGCGGGAATGTCTACAATACCTGGGTTGAATCAGATACAATTTGAAGGCTTTTGTAGATTCATTGATCAGGGCTTAACAGAAGAACTTTCTAAGTTTCCAAAAATTGCAGATACAGATCAAGAAATTGAATTTCAATTATTTGTGGAAACATATCAATTGGTAGAACCCTTGCTAAAAGAAAGAGATGCTGTATATGAATCATTCACGTATTCTTCTGAATTATATGTATCCGCAGGATTAATTTGGAAAAGCCGAGGGGATATGCAGGAACAAACAATTTTTATTGGAAACATTCCCCTAATGAATTCTTTGGGAACTTCTATAGTAAATGGAATATACAGAATTGTTATCAATCAAATATTGCAAAGTCCCGGTATCTAT…
Brombya platynema	OL591163	0.5455	0.5263	29.2857	petN	ATGGATATAGTAAGTCTCGCTTGGGCTGCTTTAATGGTAGTCTTTACATTTTCCCTTTCGCTCGTAGTATGGGGAAGAAGTGGACTCTAG
Brombya platynema	OL591163	0.4	0.44	45.1818	psbM	ATGGAAGTAAATATTCTCGCATTTATTGCTACTACACTGTTCGTTCTAGTTCCTACTGCCTTTTTGCTTATAATATACGTAAAAACGGTCAGCCAAAATGATTAA
Brombya platynema	OL591163	0.4516	0.3696	52.8203	psbD	ATGACTATAGCCCTTGGTAAATTTACCAAAGATGAAAAAGATTTATTTGATATTATGGATGACTGGTTACGGAGGGACCGATTCGTTTTTGTAGGTTGGTCCGGTCTATTGCTCTTTCCTTGTGCCTATTTCGCTTTAGGGGGTTGGTTCACAGGCACAACCTTTGTAACTTCATGGTATACCCATGGATTGGCCAGTTCCTATTTGGAAGGCTGCAACTTCTTAACCGCCGCAGTTTCGACTCCTGCTAATAGTTTAGCGCATTCTTTGTTGTTACTATGGGGTCCTGAAGCACAAGGGGATTTTACTCGTTGGTGTCAATTAGGCGGTCTTTGGACTTTTGTTGCTCTCCACGGCGCTTTCGGACTAATAGGTTTCATGTTACGTCAATTTGAACTT…
Brombya platynema	OL591163	0.4967	0.3883	49.201	psbC	GTGGAAACGCTCTTTAATGGAACTTTAGCTGTAGCAGGTCGTGACCAAGAAACCACCGGGTTTGCTTGGTGGGCCGGGAATGCCCGACTTATCAATTTATCCGGTAAACTGCTGGGCGCTCATGTAGCCCATGCTGGATTAATCGTATTCTGGGCCGGAGCAATGAACCTATTTGAAGTGGCTCATTTCGTACCCGAAAAGCCCATGTATGAACAAGGATTAATTTTACTTCCCCACCTAGCTACTCTAGGCTGGGGGGTAGGTCCTGGTGGGGAAGTTATAGACACCTTTCCATACTTTGTATCTGGAGTACTTCACTTAATTTCCTCTGCTGTATTGGGCTTTGGCGGTATTTATCATGCCCTTCTGGGACCTGAGACTCTTGAAGAATCTTTTCCA…
Brombya platynema	OL591163	0.5714	0.3333	55.8111	psbZ	ATGACTATTGCTTTCCAATTGGCTGTTTTTGCATTAATTGCTACTTCATCAATCTTACTGATTAGTGTACCCGTTGTATTTGCTTCTCCGGGTGGTTGGTCGAGTAACAAAAATGTCGTATTGTCTGGTACATCGGTGTGGATTGGATTAGTCTTTCTGGTGGGTATCCTTAATTCTCTCATCTCTTAA
Brombya platynema	OL591163	0.7429	0.5455	43.3262	rps14	ATGGCAAGGAAAAGTTTGATTCATAGGGAGAAGAAAAGGCAAAAATTGGAACAAAAATATCATTTGATTCGTCGATCCTCAAAAAAAGAAATAAACAAAGTTCCGTCGTTGAGCGATAAATGGAAAATTCATGGAAAGTTACAGTCCTCACCGCGTAATAGTGCACCTACACGTCTTCATCGACGTTGTTTTTCGACCGGAAGGCCGAGAGCTAACTATCGAGACTTTGGACTATCCGGGCACAAACTTCGTGAAATGGTTCATGCATGTTTGTTGCCGGGGGCAACAAGATCAAGTTGGTAA
Brombya platynema	OL591163	0.5447	0.3783	51.2528	psaB	ATGGCATTAAGATTTCCAAGGTTTAGCCAAGGCTTAGCTCAGGACCCCACTACTCGTCGTATTTGGTTTGGTATTGCTACCGCACATGACTTTGAGAGTCATGATGATATTACTGAGGAACGTCTTTATCAGAATATTTTTGCTTCTCACTTCGGGCAATTAGCAATAATTTTTATGTGGACTTCCGGAAATCTCTTTCATGTAGCTTGGCAAGGAAATTTTGAAGCATGGGTACAGGACCCTTTACATGTAAGACCTATTGCTCATGCTATTTGGGATCCTCATTTTGGTCAACCGGCCGTGGAAGCCTTTTCTCGTGGGGGCGCTCTTGGCCCGGTGAATATCGCTTATTCTGGTGTTTATCAGTGGTGGTATACAATCGGTTTACGCACTAATGAG…
Brombya platynema	OL591163	0.5097	0.417	52.2329	psaA	ATGATTATTCGTTCGCCGGAACCAGAAGTAAAAATTTTGGTAGATAGGGACCCCATAAAAACTTCTTTCGAGGAATGGGCCAGACCGGGTCATTTCTCAAGAACCATAGCTAAGGGACCTGATACTACCACTTGGATCTGGAACCTACATGCTGATGCTCACGACTTCGATAGCCATACCAGTGATTTGGAGGAGATCTCTCGAAAAGTATTTAGTGCCCATTTTGGACAACTCTCCATCATTTTTCTTTGGCTGAGCGGCATGTATTTCCACGGTGCTCGTTTTTCCAATTATGAAGCCTGGCTAAGCGATCCTACTCACATTGGACCCAGTGCACAGGTGGTTTGGCCAATAGTGGGCCAAGAAATATTGAACGGTGATGTGGGCGGGGGTTTCCGA…
Brombya platynema	OL591163	0.537	0.4655	61	ycf3	ATGCCTAGATCGCGGATAAATGGAAATTTTATTGATAAGACCTTTTCAATTGTAGCCAATATATTATTACGAATAATTCCGACAACTTTAGGAGAAAAAGAGGCATTTAGCTATTACAGAGATGGTGCGATGTCAGCTCAATCTGAAGGAAATTATGCGGAAGCTTTACAGAATTATTATGAAGCTATGCGACTCGAAATTGATCCCTACGATCGAAGCTATATACTCTATAACATAGGCCTTATCCACACAAGTAACGGAGAACATACAAAAGCTTTAGAATATTATTTTCGGGCACTCGAACGAAATCCATTCTTACCACAAGCTTTTAATAATATGGCTGTAATCTGTCATTACCGGGGAGAACAGGCCGTTCGTCAGGGAGATTCTGAAATTGCG…
Brombya platynema	OL591163	0.4912	0.5102	57.0065	rps4	ATGTCACGTTACCGAGGGCCTCGTTTCAAAAAAATACGCCGTCTGGGGGCTTTGCCGGGACTAACGGGTAAAGGGCCTAGAGCCGGAAGCGATTTTCGAAACCAATCGCGCTCCGGAAAAAAATCTCAATATCGAATTCGTTTAGAAGAAAAACAAAAATTGCGTTTTCATTATGGTCTTACAGAACGACAATTACTTAAATATGTTCGTATCGCCGGAAAAGCCAAAGGGTCAACCGGCCTGGTTTTACTACAATTACTTGAAATGCGTTTGGATAACATCCTTTTTCGATTGGGTATGGCTTCAACTATTCCTCAAGCCCGCCAATTAATTAACCATCGGCATATTTTAGTTAATGGGCGTATAGTCGATATACCAAGTTATCGTTGCAAACCCCGA…
Brombya platynema	OL591163	0.6296	0.4095	61	ndhJ	ATGCAGGGTCGTTTGTCTGCTTGGCTAGTCAAGCGTGGGATAGTTCATAGATCTTTGGGCTTCGATTACCAAGGAATAGAAACTTTACAAATAAAGCCCGAGGATTGGCATTCCGTTGCTGTCATTTTGTATGTATATGGTTACAATTATCTACGTTCCCAATGTGCCTATGATGTAGCACCGGGTGGACTGTTAGCCAGTGTGTATCATCTTACGCGACTAAAGTATGGTCTAGATCAACCCGAAGAGGTATGCATAAAAGTATTTGCTCCAAGGAGTAATCCTAAAATCCCATCTGTTTTCTGGGTTTGGAAAAGTGCGAATTTTCAAGAACGGGAATCTTATGATATGTTGGGACTCTTTTATGATAATCATCCACGGCTGAAACGTATCTTAATG…
Brombya platynema	OL591163	0.5217	0.4403	61	ndhK	ATGAATTCCATTGAATTTTCTTTACTTGATCGAACAACCCCAAATTCATTTATTTCAACTACATCAAACGATCTTTCCAATTGGTCAAGACTCTCCAGTTTATGGCCGCTTCTTTATGGTACCAGTTGTTGTTTCATTGAATTTGCTTCATTAATTGGCTCGCGGTTCGATTTTGACCGTTATGGACTGGTACCACGATCGAGCCCTAGACAGGCGGACCTAATTTTAACAGCCGGTACCGTAACAATGAAAATGGCTCCTTCTTTAGTGAGATTATATGAACAGATGCCTGAACCAAAATATGTTATTGCTATGGGAGCATGTACAATTACAGGGGGGATGTTCAGTACTGATTCGTATAGTACTGTTCGAGGAGTTGATAAGCTAATTCCTGTGGAT…
Brombya platynema	OL591163	0.6061	0.4318	61	ndhC	ATGTTTCTGCTTTACAAATATGATATTTTCTGGGCATTTCTAATAATATCAAGCGTTATTCCTATTTTGGCATTTCGAATTTCCGCAGTTTTAGCCCCGATTATCAAAGGGCCAGAAAAACTTTCTAGTTATGAATCGGGTCTAGAACCAATGGGCGATGCTTGGTTACAATTTCGAATCCGGTATTATATGTTTGCTCTAGTTTTTGTTGTTTTTGATGTTGAAACCGTTTTTCTTTATCCATGGGCAATGAGTTTTGATGTATTAGGGGTATCCGTATTTATAGAAGCTTTCATTTTCATGCTTATCCTAATTGTTGGTTCAGTTTATGCGTGGCAAAAAGGAGCATTAGAGTGGTCTTAG
Brombya platynema	OL591163	0.6047	0.4889	61	atpE	ATGACCTTAAATCTTTGTGTACTGACCCCGAATCGAATTGTTTGGGATTCAGAAGTGAAAGAAATCATTTTATCGACTAATAGTGGACAAATAGGCGTATTACCAAATCATGCGCCTATTGCCACAGCTGTAGATATAGGCATTTTAAGAATCCACTTTAACGACCAATGGGTAACGATGGCTCTGATGGGTGGTTTTGCTAGAATAGGGAATAATGAGATCACTATTTTAGTAAATGATGCGGAGAAGAGTAGTGACATTGATCCCCAAGAAGCCCAGCAAACTCTTGAACTAGCGGAAGCTAATTTGAGGAAAGCTGAAAGCAAGAGACAAACAATTGAGGCAAATCTAGCTCTCAGACGAGCTAGGACACGAGTAGAGGTTATCAATGCGATTTGA
Brombya platynema	OL591163	0.537	0.4718	52.2137	atpB	ATGAGAATAAATCCTACTACTCCCGGCCCTGGGGTTTCCGCGCTTGCAAAAAAAAACCTGGGACATATCGCTCAAATCATTGGTCCGGTACTGGATGTAGCCTTTCCCCCGGGGAAGATGCCTAATATTTACAATGCTCTAGTAGTTAAGGGTCGAGATACTGTCGGTCAACCAATTAATGTGACTTGCGAGGTACAGCAATTATTAGGGAATAATCGGGTTAGAGCTGTAGCCATGAGTGCTACAGATGGTCTAACGAGAGGGATGGAAGTAATTGACACGGGAGCTCCTCTAAGTGTTCCAGTCGGCGGAACGACTCTAGGACGAATTTTCAACGTGCTTGGAGAGCCTGTTGATAATTTAGGTCCGGTAGATACTCGCACAACATCCCCTATTCAT…
Brombya platynema	OL591163	0.4777	0.4169	51.8597	rbcL	ATGTCACCACAAACAGAGACTAAAGCGAGTGTTGGATTCAAAGCCGGTGTTAAAGATTATAAATTGACTTATTATACTCCTGACTATGTAACCAAAGATACTGATATCTTGGCAGCATTCCGAGTAACTCCTCAACCCGGAGTTCCACCCGAGGAAGCGGGGGCTGCAGTAGCTGCGGAATCTTCTACTGGTACATGGACAACTGTGTGGACCGATGGGCTTACCAGCCTTGATCGTTACAAAGGGCGATGCTACAACATTGAGCCCGTTGCTGGAGAAGAAAATCAATATATATGTTATGTAGCTTACCCGTTAGACCTTTTTGAAGAAGGTTCTGTTACTAACATGTTTACTTCCATTGTGGGTAATGTATTTGGTTTCAAAGCCCTGCGCGCTCTA…
Brombya platynema	OL591163	0.5263	0.3488	48.1222	accD	ATGAAAAAAGGGTGGTTCAATTCGATGTTATCTAAGGGTAAAGGGGAATTAGAATACAGGTGTGGGTTAAGTAAATCAATGGATAGTTTTGGTCCTATTAAAAATACCAGTGTAAGCGAGGACTCAATTCGAAATGATAAGGATAAAAACATTCATAGTTCGAGTGATAGTGACTGTTCGAGTTACAGCAATTTAGCCGGTGTCGGGGACATTCGTAATTTCATCTCAGATGACACCTTTTTTGTTAAGGATAGTAATAGGGACAGCTATTCCATATATTTGGATATTGAAAATCAAATTTTGGAAATAGACAATGCTCATTCTTTTCTGAGTGAACTAGAAAGTTCTTTTTATAGCTTTCGTAATTATAGTTCTAGGAATACTGGATCCAAAAGTGAT…
Brombya platynema	OL591163	0.5385	0.44	61	psaI	ATGACAATTCTCAACAGCTTTCCCTCTATTTTAGTCCCTTTAGTGGGCCTAGTATTTCCGGCAATGGCAATGGCTTCGTTATTTCTTTATCTTGAAAAAAATAAGATTTTTTAA
Brombya platynema	OL591163	0.5538	0.4167	51.1168	ycf4	ATGAGTTGGCGATCAGAATATATATGGATAGAATTTATAGCGGGCTCTCGCAAAACAAGCAATGTCTGCTGGGCCCTTATCCTTTTTTTAGGTTCATTAGGATTCTTAGTGGTTGGAATTTCTAGTTATCTTGATAGGAATTTGCTATCTTTATTTCCGTCTCAGCAAATCAATTTTTTTCCACAAGGGATCGTGATGTCTTTCTACGGGATCGCGGGTCTCTTTATTAGTTCCTATTTGTGGTGCACAATTACATGGAATGTAGGTAGCGGTTATGATCGATTTGATACAAAAGAGGGAATAGTGTGTATTTTTCGTTGGGGATTTCCTGGAAAAAATCGCCGCATATTTCTACGATTCCTTATGAAAGATATTCAGTCCATCAGAATAGAAGTTAAA…
Brombya platynema	OL591163	0.5135	0.4074	60.7168	cemA	ATGACAAAAAAAAAGAACGCATCCATTCCCCTTAGATATCTTTCATCTATAGTATTTGTAGTATTTTTGCCCTGGTGGATCCCTCTCTCATTTAATAAAAGTCTGGAATCCTGGGTTACAAATTGGTGGAATACTAGTCAACCCGAAACCTTCTTGAATGATATTCAAGAAAAGTCTATTCTAGAAAAATTCATAGAATTAGAGGAATTATTCCTCTTGGACGAAATGATAAAGGAATTTCCGGAAAGACGTCTAGAAAAGCTTCGTATAGGGCTCCCGAAAGAAACAATTCAATTAATCAAGATGCACGATGAGGATCATATCCATACGATTTTTCACTTCTCGACAAATACAATCTGCTTCGTTATTCTAAGTGGTTATTCGATTCTGTGTAATGAA…
Brombya platynema	OL591163	0.5596	0.4528	61	petA	ATGCAAATTCGAAATACCTTTTCTTCGTTAAAGGGAGAGATTACTCAATTCATTTCCGTATCCCTCATGATATATATAATAACTCGGGCATCAATTTCAAACGCATATCCCGTTTTTGCGCAACAGGGTTTTGAAAATCCACGAGAGGCAACTGGTCGCATTGTATGCGCCAATTGTCATTTAGCTAATAAGCCCGTGGATATTGAGGTTCCACAAACGGTACTCCCTGATACTGTATTTGAAGCAGTTGTTAGAATTCCGTATGATATGCAACTGAAACAAGTTCTTGCTAATGGTAAAAAGGGGTCTTTGAATGTGGGGGCCGTTCTTATTTTACCAGAGGGGTTTGAATTAGCCCCCTCCGACCGTATTTCGCCCGAGATGAAAGAAAAGATAGGC…
Brombya platynema	OL591163	0.5385	0.3571	61	psbJ	ATGGCCGATACTACTGGAAGGATTCCCCTTTGGATAATAGGTACTGTAACTGGTATTATAGTGATTGGTTTAATAGGCATTTTCTTTTATGGTTCATATTCCGGATTAGGTTCGTCCTTGTAG
Brombya platynema	OL591163	0.3333	0.4583	61	psbL	ATGACACAATCAAACCCGAACGAACAAAATGTTGAATTGAACCGTACCAGTCTCTACTGGGGGTTATTACTCATTTTTGTACTTGCTGTTTTATTTTCCAATTACTTTTTCAATTAA
Brombya platynema	OL591163	0.6	0.6	55.2727	psbF	ATGACCATAGATCGAACCTATCCAATTTTTACAGTGCGATGGTTGGCTGTGCACGGACTAGCTGTACCTACCGTTTCTTTTTTGGGGTCAATATCAGCAATGCAGTTCATCCAACGATAA
Brombya platynema	OL591163	0.4074	0.4035	53.436	psbE	ATGTCTGGAAGCACAGGAGAACGTTCTTTTGCTGATATTATTACCAGTATTCGATACTGGGTCATTCATAGCATTACTATACCTTCCCTATTCATTGCGGGTTGGTTATTTGTCAGCACGGGGTTAGCTTACGATGTGTTTGGAAGCCCTCGTCCAAACGAGTATTTTACAGAGAGCCGACAAGGAATTCCATTAATAACCGGACGTTTTGATTCTTTGGAACAACTCAACGAATTTAGTAGATCTTTTTAG
Brombya platynema	OL591163	0.6667	0.3462	34.6842	petL	ATGCCTACTATAACTAGTTATTTTGGTTTTCTCCTAGCAGCTTTAACTATAACCTCGGCTCTATTTATTGGTCTGAGTAAGATAGGACTTATTTGA
Brombya platynema	OL591163	0.3636	0.4815	61	petG	ATGATTGAAGTCTTTCTATTTGGAATCGTCTTAGGTCTAATTCCTATTACTTTGGCTGGATTATTCGTAACCGCATATTTACAATACAGACGTGGTGATCGGTTGGACCTTTGA
Brombya platynema	OL591163	0.6316	0.6154	61	psaJ	ATGCGAGATCTAAAAACATATCTTTCCGTGGCACCGGTACTAAGTACTCTATGGTTCGGGTCTTTAGCAGGGTTATTGATAGAAATCAACCGTTTGTTCCCGGACGCATTGACATTTCCGTTTTTTTCATTCTAG
Brombya platynema	OL591163	0.619	0.4375	53.5725	rpl33	ATGGCCAAGGGTAAAGATGTCCGAGCAAGGGTTATTTTGGAATGTACTCGTTGTGTTCGAAACAGTGTTAATAAGGAATCAAGGGCAAGGGGTATTTCCAGATATATTACTCAAAAGAATCGACACAATACACCTAGTCGATTGGAATTGAGAAAATTCTGTCTCTATTGTTACAAACATACACTTCATGGGGAGATAAAAAAATAG
Brombya platynema	OL591163	0.625	0.5128	61	rps18	ATGGATAAAACCAAGCGACTCTTTCTTAAATCCAAGCGATCTTTTCGTAGGCGTTTGCCCCCGATACAATCGGGGGATCGAATTGATTATAGAAACATGACTTTAATTAGTCGATTTCTTAGTGAACAAGGAAAAATATTATCTAGACGGGTGAATAGATTGACCTTAAAAGAACAACGATTAATTACTATTGCTATAAAACAAGCTCGTATTTTATCTTCGTTACCTTTTCTTAATAATGACAAACAATTTGAAAGAAATGGGTCAACCACTCGAACTCCAGGTCTTCGAACCAGAAAAAAATAG
Brombya platynema	OL591163	0.7143	0.4778	61	rpl20	ATGACCAGAATTAGACGAGGATATATAGCTCGGAGACGTAGAACAAAAATGCGTTTATTTGCATCAAGCTTTCGCGGGGTTCATTCAAGACTTAGTCGAACAATTACTCAACAGAAAATAAGAGCTTTGGTTTCGGCTCATCGTGATAGCGATAGACAAAAAAGGGATTTTCGTCGTTTGTGGATCACACGAATAAATGCAGTAATTGGCGGAAATGGGGTATCCTATATTTATAGTAGATTAATACAAAATCTGTATAAGGCGCAGCTGGTTCTTAATCGTAAGATACTTGCACAAATAGCTATATCAAATAGGAATTGTCTTTATATGATTTCCAATGAGATTTTAAAATAA
Brombya platynema	OL591163	0.3898	0.4667	59.0608	rps12	CTACAACGCACTAGAACGCCCTTGTTGACGATCCTTTACTCCGACAGCATCTAGGGTTCCTCGAACAATGTGATATCTCACACCGGGTAAATCCTTAACCCTCCCCCCTCTTACTAAGACTACAGAATGTTCTTGTGAATTATGGCCAATACCAGGTATATAAGCAGTGATTTCAAACCCAGAGGTTAATCGTACTCTGGCAACTTTACGTAAGGCAGAGTTTGGTTTTTTGGGGGTGATAGTATGCCGACTATTAAACAACTTATTAGAAACCCAAGACAGCCAATCAGAAACGTTACAAAATCCCCCGCTCTTGGGGGATGCCCTCAGCGCCGAGGAACATGTACAAGGGTGTAT
Brombya platynema	OL591163	0.5286	0.4921	61	clpP1	ATGCCTATTGGTGTTCCAAAAGTACCTTATCGAAGTCCCGGGGACAAGCATCCATCTTGGGTTGACATCAACCGACTTTATCGAGAAAGATTACTTTTTTTAGGTCAAATGGTTGAGAGTGATATCTCGAATCAACTTATTGGTATTATGGTATATCTCAGTATAGAGAACGAGACCAAAGATTTGTATTTATTTATCAACTCTCCTGGCGGATGGGTAATACCCGGAATAGCAATTTATGATACTATGCAATTTGTGCGACCAGATGTACAGACAATATGCATGGGATTGGCCGCCTCCATGGGGTCTTTTCTCCTGGCCGCAGGAGCAAGTACCAAACGTCTAGCATTCCCTCACGCTAGGGTCATGATCCATCAACCTTTTGGCGCTTTTTATGGG…
Brombya platynema	OL591163	0.5217	0.4253	49.0117	psbB	ATGGGTTTGCCTTGGTATCGTGTTCATACCGTCGTATTGAATGATCCCGGTCGTTTGATTGCTGTCCATATAATGCATACAGCTCTGGTTGCGGGTTGGGCCGGTTCAATGGCTCTATATGAATTAGCTGTTTTTGATCCCTCCGATCCGGTTCTTGATCCAATGTGGAGACAAGGCATGTTCGTTATACCCTTCATGACTCGTTTAGGAATAACCGATTCATGGGGCGGTTGGAGTATTACAGGGGGGACGGTAACGAATCCGGGTATTTGGAGCTACGAAGGTGTAGCCGGGGCACATATTGTATTTTCGGGCTTGTGCTTCTTGGCAGCTATCTGGCATTGGGTGTATTGGGATCTAGCAATATTTGTCGATGACCGTACGGGAAAACGGTCTTTG…
Brombya platynema	OL591163	0.4545	0.5217	43.1429	psbT	ATGGAAGCATTGGTTTATACATTCCTCTTAGTCTCGACTCTAGGGATCATTTTTTTCGCTATCTTTTTTCGAGAACCGCCTAAAGTTCCAACTAAAAAATGA
Brombya platynema	OL591163	0.4118	0.5556	61	psbN	ATGGAAACAGCAACCCTAGTCGCCATTTCTATATCTGGGTTACTTGTAAGTTTTACTGGGTACGCCTTATATACTGCCTTTGGGCAACCCTCTCAACAACTAAGAGATCCATTCGAGGAACACGGGGACTAG
Brombya platynema	OL591163	0.8261	0.4118	61	psbH	ATGGCTGCACAAACAGTTGAGGGTAGTTCTAGAGCTCGTCCAAAAAAGACTTCTGCAGGGGGGTTATTGAAACCTTTGAATTCGGAATATGGTAAAGTAGCTCCTGGATGGGGAACTACTCCTTTGATGGGTATCGCAATGGCTCTATTTGCGATATTCCTGTCTATTATTTTAGAGATTTATAATTCGTCCGTTTTACTGGACGGAATTTCAATGAATTAG
Brombya platynema	OL591163	0.5429	0.4247	54.8311	petB	ATGAGTAAAGTCTACGATTGGTTCGAAGAACGTCTCGAGATTCAGGCGATTGCAGATGATATAACTAGTAAATACGTTCCTCCCCATGTCAACATATTTTATTGTCTAGGAGGAATTACGCTTACTTGTTTTTTAGTACAAGTAGCTACAGGGTTTGCTATGACTTTTTACTACCGTCCGACCGTTTCTGAGGCTTTTGCTTCTGTTCAATACATAATGACGGAAGCTAACTTTGGTTGGTTAATCCGATCAGTTCATCGATGGTCGGCAAGTATGATGGTCCTAATGATAATCCTGCACGTATTTCGTGTGTATCTCACTGGCGGTTTTAAAAAACCTCGCGAATTGACTTGGGTTACAGGCGTGGTTCTGGCTGTATTGACCGCATCTTTTGGTGTA…
Brombya platynema	OL591163	0.587	0.4783	45.6787	petD	ATGGGAGTAACAAAAAAACCTGACTTGAACGATCCTGTTTTAAGGGCTAAGTTGGCTAAAGGTATGGGTCATAATTATTATGGAGAACCCGCGTGGCCCAATGATCTTTTATATATTTTTCCGGTAGTAATTCTAGGTACTATTGCATGTAACGTAGGCTTAGCGGTTCTAGAACCATCCATGATTGGTGAACCCGCGGATCCGTTTGCAACTCCTTTGGAAATATTACCCGAATGGTATTTCTTTCCTGTATTTCAAATACTTCGTACAGTACCCAATAAGCTGTTGGGTGTTCTTTTAATGGTTTCAGTACCTGCGGGATTATTAACAGTACCCTTTTTGGAAAATGTTAATAAATTCCAAAATCCATTTCGCCGTCCAGTAGCGACAACCGTTTTT…
Brombya platynema	OL591163	0.5052	0.4891	54.5758	rpoA	ATGGTTCGAGAGAAAGTAAAAGTATCTACTCGTACACTACAGTGGAAGTGTGTTGAATCAAGAGCAGACAGTAAGCGTCTTTCTTATGGACGCTTTATTTTGTCTCCACTTATGAAAGGTCAAGCCGACACAATAGGCAGTGCGATGCGAAGAGTTTTGCTTGGAGAAATAGAAGGAACGTGTATTACACGCGCAAAATCTGAGAAAATCCCACACGAATATTCTACCATAGTGGGTATTCAAGAATCGGTACATGAAATTTTAATGAATTTGAAAGAAATTGTATTGAGAAGTAATCTTTATGGAACTTGTGACGCCCTTATTTGTGTCAAAGGTCCCGGATATGTAACTGCTCAAGACATCCTCTTGCCACCTTCTGTGGAAATCGTTGATAAGACG…
Brombya platynema	OL591163	0.5789	0.4851	61	rps11	ATGGCAAAATCTACACCAAGAAGTGGTTCACGTCGGGCTGGACGGATTGGTTTGCGTAAAAGTGGACGTCGAATACCAAAGGGCATTATTCATGTTCAAGCAAGTTTCAACAACACCATTGTGACTGTTACGGATGTACGGGGTCGGGTAATTTCTTGGTCCTCGGCCGGTACTTGTGGATTCAGGGGTACAAGAAGAGGTACGCCCTTTGCTGCTCAAACTGCAGCAGGAAGTGCTATTCGAGCAGTAGCGGATCAAGGTATGCAACGAGCAGAAGTCATGATAAAAGGTCCTGGTCTGGGAAGAGATGCAGCATTACGAGCTATTCGTAGAAGCGGTATCCTTTTAAATTTCGTACGGGATGTAACCCCTATGCCACATAATGGTTGCAGACCCCCT…
Brombya platynema	OL591163	0.6154	0.64	22.75	rpl36	ATGAAAATAAGGGCTTCCGTTCGGAAAATTTGTGAAAAATGTCGACTGATCCGCAGGAGGGGACGGATTATAGTAATTTGTTCCAACCCGAGACATAAACAAAGACAAGGATAA
Brombya platynema	OL591163	0.4773	0.5275	53.1373	rps8	ATGGGCAAGGACACTATTGCTGACATAATAACTTATATACGAAATGCTGATATGAATCGAAAAGGAACGGTTCAAATAGCATATACTAACATCGCCGAAAACATTGTTAAAATACTTTTGCGAGAGGGTTTTATAGAAAACGTCAGGAAATTCGTGGAAAACAAAAAAGAGTTTTTGGGTTTAACCCTACGACATAGAAGGAATAGGAAAGGACCGTATAGACCCATTTTCAATTTAAAACGAATCAGTCGCCCCGGTCTACGAATCTATTTTAACTATGAACGAATTCCTAGAATTTTAGATGGGATGGGGATTGTAATTCTCTCTACTTCTCGGGGTATAATGACAGACCGAGCGGCTCGACTAGAAAGAATCGGCGGAGAAATTTTGTGTTATATA…
Brombya platynema	OL591163	0.4848	0.4778	54.503	rpl14	ATGATTCAACCTCAAACCCATTTGAATGTAGCGGACAATAGCGGTGCCCAAGAATTGATGTGTATTCGAATCATAGGAGCCAGTAATCGTAGATATGCTCATATTGGTGACGTTATTGTTGCTGTGATCAAAGAAGCAGTACCAAATATGCCTCTAGAAAGATCCGAAGTGATCAGAGCTGTAATTGTACGTACCTGTAAAGAACTCAGACGGGATAACGGTATGATAATACGTTATGATGACAATGCTGCAGTTGTCATTGATCAAGAAGGAAATCCAAGGGGAACTCGAGTTTTTGGTGCGATCGCCCGAGAATTGAGACAGTTGAATTTTACTAAAATTGTTTCATTAGCGCCTGAAGTATTATAA
Brombya platynema	OL591163	0.4286	0.5895	44.9477	rpl16	ATGCTTAGTAACCCCAAAAGAACAAGATTCCGTAAACAACATAGAGGAAGAATGAAAGGAATATCTTATCGAGGTAATCATATTTGTTTCGGCAGATATGCTCTTCAAGCACTTGAACCCGCTTGGATCACATCTAGACAAATCGAAGCAGGGCGCCGAGCAATGACACGAAATGTACGGCGTGATGGAAAAATATGGGTACGCGTATTTCCAGACAAACCCGTTACAGTAAGACCCACAGAAACCCGTATGGGGTCCGGCAAAGGGTCCCCCGAATGTTGGGTAGCCGTCGTTAAACCGGGTAGAATACTTTATGAAATGAGTGGAGTCGCTGAAAATATCGCTCGAAAGGCTATTGAAATAGCGACGTCCAAAATGCCTATAAGAACTCAATTCATT…
Brombya platynema	OL591163	0.4	0.608	41.9042	rps3	ATGGGACAAAAAATAAATCCACTTGGTTTCCGACTTGGTACAACACAAAGTCATCATTCGCTTTGGTTTGCAGCAAAACAAAAAAATTATTGCGAAGGTCTACAAGAAGATCAAAAAATACGAAACATTATTAAGAATTATGTACAAAAAAATATGAGAATATCCTCCGGCGTTGAGGGAATTGCCTGGATAGAGATTCAAAAAAGAATTGATCTAATTCAAGTCATAATATATATAGGATTCCCAAAATTATTACTAGAAAATAGACCGCGAAGAATTGAAGAATTACAGATGAATGTACAAAAAGAACTTAATTGTGTGAACCGAAAAATAAACATTGCTATTACAAGAATTGGAAATCCTTATGGACACCCCAATATTCTTGCCGAATTTATAGCC…
Brombya platynema	OL591163	0.4737	0.4941	61	rpl22	ATGATAAGGATAATAAAGAAAAAGGTAGAAGTATCTGCTCACAAAGCCCGAAGGGTAATTGATCAGATTCGTGGACGTTCTTACGAGGAAGCCCTTATGATACTCGAACTCATGCCTTATCGAGCATGTTATCCCATTAAAAAATTGGTTTATTCTGCAGCAGCAAATGGTATTCACAATCTGGGTTTCAACGAAGCGAGTTTATTCATTATTAAAGCCGAAGTAAACGAGGGTCCTACTGCGAAAAGATTAAAACCTCGAGCTCGAGGGCGGAGTTCTATGAACAAAAGACGCACTTGTCATATAACTATTGTTTTAAAAGATATCTCATTAGATGAATATGAATATAGGGACTATCTCGACTGCTAA
Brombya platynema	OL591163	0.6364	0.4789	46.9597	rps19	GTGACACGTTCACTAAAAAAAAATCCTTTTGTAGTGAATCGTTTATTAAGAAAAATCGATAAGCTTAATACAAAAGCGGAAAAAGAAATAATAATAACTTGGTCTCGGGCATCTACCATTATACCCACAATGGTGGGCCATACTATTGCTATCCATAATGGAAGGGAGCATTTGCCTATTTATATAACAGATCGTATGGTAGGACATAAATTGGGAGAATTTGCGCCCACTATCAATTTTCGTGGACATGCAAAAAATGATAATAGATCCCGTCGTTAA
Brombya platynema	OL591163	0.4945	0.5054	55.3492	rpl2	ATGGCGGTACATTTATACAAAACTTCTACCCCGAGCACACGCAATGGAGCCGTAGACAGTCAAGTGAAATCCAATCCACGAAATAATTTGATCTATGGACAGCATCGTTGTGGTAAAGGTCGTAATGCCAGAGGAATCATTACCGCAGGGCATAGAGGGGGAGGTCATAAGCGTCTATACCGTAAAATCGATTTTCGACGGAAGGAAAAAGACATATATGGTAGAATCGTAACCATAGAATACGACCCTAATCGAAATGCATACATTTGTCTCATACACTATGGGGATGGTGAGAAGAGATATATTTTACATCCCAGAGGGGCTATAATTGGAGATACCATTGTTTCTGGTACAGAAGTTCCTATAAAAATGGGAAATGCCCTACCTTTGACCGATATG…
Brombya platynema	OL591163	0.5714	0.5152	61	rpl23	ATGGATGGAATCAAATATGCAGTATTTACAGACAAAAGTATTCGGTTATTGGGGAAAAATCAATATACTTCTAATGTCGAATCAGGATCAACTAGGACAGAAATAAAGCATTGGGTCGAACTCTTCTTTGGTGTCAAGGTAATAGCTATGAATAGTCATCAACTCCCCCGAAAGGATAGAAGAATGGGACCTATTATGGCACATACAGTGCATTACAGACGTATGATCATTACACTTCAACCGGGTTATTCTATTCCACCTCTCAGAAAGAAAAGAACTTAA
Brombya platynema	OL591163	0.5313	0.4426	53.6221	ycf2	ATGAAAGGACATCAATTAAAATCCTGGATTTTCGAATTGAGAGAGATATTGAGAGAGATCAAGAATTCTCACTATTTCTTAGATTCATGGACCCAATTCAATTCAGTGGGATCTTTCATTCACATTTTTTTCCACCAAGAACGTTTTATAAAACTCTTGGACCCACGAATTTGGAGTATCCTACTTTCACGCAATTTACAGGGTTCAACAAGCAATCGATATTTCACGATCAAGGGTGTAGTACTATTTGTAGTAGCGATCCTTATATATCGTATTAACAATCGAAATATGGTCGAAAGAAAAAATCTCTATTTGACAGGGCTTCTTCCTATACCTATGAATTCCATTGGACCCAGAACTGATACATTGGAAGAATCTTTTGGGTCTTCCAATATCAAT…
Brombya platynema	OL591163	0.5714	0.6875	39.4211	ycf15	ATGCTACTGCTGAAACATAGAAGAATTGAAATCATAGATCAAAACACTATGTATGGATGGTATGAACTGCTTAAACAAGAATTCTTGAACAGCGAACCACCAGAGCTATTACTAACTACATCAAAAAATTTCCATTAA
Brombya platynema	OL591163	0.4242	0.4538	51.6506	ndhB	ATGATCTGGCATGTACAGAATGAAAACTTCATTCTCGATTCTACGAGAATTTTTATGAAAGCCTTTCATTTGCTTCTCTTCGATGGAAGTTTTATTTTCCCAGAATGTATCCTAATTTTTGGCCTAATTCTTCTTCTGATGATCGATTCAACCTCTGATCAAAAAGATATACCTTGGTTATATTTCATCTCTTCAACAAGTTTAGTAATGAGCATAGCGGCCCTATTGTTCCGATGGAGAGACGAACCTATGATTAGCTTTTCGGGAAATTTCCAAACGAACAATTTCAACGAAATCTTTCAATTTCTTATTTTACTATGTTCAACTCTATGTATTCCTCTATCCGTGGAGTACATTGAATGTACAGAAATGGCTATAACAGAGTTTCTGTTATTCGTA…
Brombya platynema	OL591163	0.4872	0.5812	44.3734	rps7	ATGTCACGTCGAGGTACTACAGAAGAAAAAGCTGCAAAATCCGATCCAATTTATCGTAATCGCTTAGTTAACATGTTGGTTAACCGTATTCTGAAACACGGAAAAAAATCATTGGCTTATCAAATTATCTATCGAGCCTTGAAAAAGATTCAACAAAAGACAGAAAAAAATCCACTATCCGTTTTACGTCAAGCAATACGTGGAGTAACTCCCGATATAGCAGTAAAAGCAAGACGTGTAGGCGGATCGACTCATCAAGTTCCCATTGAAATAGGATCCGCACAAGGAAAAGCACTTGCCGTTCGTTGGTTATTAGGGGCATCCCGAAAACGTCCGGGTCAAAATATGGCTTTCAAATTAAGTTCCGAATTAGTGGATGCTGCCAAAGGGAGTGGCGAT…
Brombya platynema	OL591163	0.8	0.5349	53.0422	rpl32	ATGGCAGTTCCAAAAAAATGTACTTCTATATTAAAAAACCATATTCGTAAGAATATTTGGAAAAAAGGAGGGTATTGGTCAACATCGAAGGCTTTTTCCTTAGCGAAATCCCTTTCTATTGGGAATTCACAAAGTTTTTTTGTAAAACAAATAAATAAGAAAACGTTGGAATAA
Brombya platynema	OL591163	0.5543	0.4626	56.0821	ccsA	ATGATCTTTTCAACGTTAGAGCATATATTAACGCATATATCCTTTTCGGTCGTTTCAATTGGAATTCCAATATATTTACTAACCTTATTAGTCGATGAAATAAGAGGACTATATGATTCATCAGAAAAGGGGATGATAGCTACCGCTTTCTGTCTAACAGGATTATTAATCACCCGTTGGATTTACTCGAGGCATTTCCCATTAAGTGATTTATATGAATCATTAATCTTTCTTTCATGGAATTTCTCCATTATTCATAGGATTTTTGATTTTAAAAATAATAAAAATCATTTAAGCGCTATAACGGCACCAAGTGCTATTTTTACCCAAGGCTTTGCGACTTCGGGTTTTTTAACTAAAATGCATCAATCCGGAATATTAGTACCTGCTCTCCAAGTC…
Brombya platynema	OL591163	0.4875	0.4789	50.7457	ndhD	ATTGTAGTTTTTCCAATAGCCGCGGGTTCTTTAATTTTCTTTCTCCCTCATAGAGGAAATAAGGTGACTAGAGGATATACAATATATATATGTGTCTTAGAACTCCTTCTAACGACCTATGCATTCTGTTCTAATTTCCAATTGGACGATCTATTAATCCAGCTGGCCGAGGATGATAAATGGATCACCTTTTTTTATTTTGACTGGCGGTTGGGAATAGATGGACTTTCCATAGGACCCGTTTTACTGACGGGATTTATCACTACTTTAGCTACTGTAGCGGCTCGGCCAGTTACTCGGAATTCCCGACTATTCCATTTCCTGATGTTAGCGATGTACAGCGGTCAAATAGGATCATTTTCTTCTCGAGACCTTTTACTTTTTTTCATCATGTGGGAA…
Brombya platynema	OL591163	0.5714	0.4754	31.4976	psaC	ATGTCACATTCAGTAAAGATTTATGATACATGTATAGGGTGTACTCAATGTGTCCGAGCTTGCCCCACAGATGTATTAGAAATGATACCTTGGGACGGATGTAAAGCAAAGCAAATTGCTTCTGCTCCAAGAACAGAAGATTGTGTTGGTTGTAAGCGATGCGAATCCGCCTGTCCAACGGATTTCTTGAGTGTTCGGGTTTATTTATGGCATGAAACAACTCGAAGCATGGGTCTAGCTTATTGA
Brombya platynema	OL591163	0.5667	0.3611	61	ndhE	ATGATGCTCGAGCATGTACTTGTTTTGAGTGCCTATTTATTTTCTATTGGTATCTATGGATTGATTACGAGCCAAAATATGGTTCGGGCCCTGATGTGTCTTGAACTTATACTAAATGCAGTTAATATCAATTTCGTAACATTCTCTTATTTTTTTGATAGTCGACAATTAAAAGGAGATATTTTCTCAATTTTTGTTATAGCTATTGCAGCCGCTGAAGCAGCTATCGGATCAGCTATTGTTTCGTCAATTTATCGTAACAGAAAATCGACTCGTATCAATCAATCGACTTTGTTGAATAAGTAG
Brombya platynema	OL591163	0.4808	0.3937	58.6442	ndhG	ATGGATTTGCCTGGACCAATACACGATTTTCTTGTAGTTTTTCTGGGATCAGGTCTTATATTAGGAGGTCTAGGGGTGGTATTATTTAGCAACCCCATTTATTCTGCCTTTTCCTTGGGATTGGTTCTTGTTTGTATATCCTTATTCTATATTCTATCAAATTCCCATTTTGTAGCTGCCGCGCAGCTCCTTATTTACGTGGGAGCTGTAAATGTTTTAATCATATTTGCTGTAATGTTCATGAATGGTTCAGACTATTCCAAAGATTCGAATGAAAATCTTTGGACTGTTGGTCACGGACTTACTTCCCTGGTTTGTACAAGTATTTTTTTTTCAATAATCGCTACTATTCTAGATACGTCGTGGTACGGGATTATTTGGACTACACGACCCAACCAG…
Brombya platynema	OL591163	0.5946	0.4198	60.0335	ndhI	ATGTTTCCTATGGTAATTGGTTTCATGAATTATGGTCAACAAACAATACGAGCTGCAAGGTACATCGGTCAAAGTTTCATGATTACTTTATCCCAAGCAAATCGTTTACCTGTAACTATTCAATATCCTTATGAAAAATTAATGACATCGGAGCGGTTTCGCGGTCGAATCCATTTTGAATTTGATAAATGTATTGCTTGTGAAGTGTGCGTTCGCGTATGTCCTATAGATCTGCCTGTTGTTGATTGGAAATTTGAAACAGATATTCGAAAGAAACGATTACTTAATTACAGTATTGATTTTGGAATTTGTATTTTTTGTGGTAACTGTGTTGAGTATTGTCCAACAAATTGTTTATCAATGACTGAAGAATATGAACTTGCTACTTACGACCGTCAC…
Brombya platynema	OL591163	0.4881	0.5036	50.4992	ndhA	ATGATAATTGATAGAACAGAAGTACAAGATATCAATTCTTTTTCCAGATTGGAATCCCTACAAGAGGTCTATGGGATCATGTGGGTGCTTGTCCCTATTTTGACTCCTGTAGTGGCAATCACAATAGGTGTCCTAGTAATTGTGTGGTTAGAAAGAGAAATATCTGCAGGAATACAACAACGTATTGGGCCTGAATACGCCAGTCCATTGGGAATTCTTCAAGCTTTAGCAGATGGGACAAAACTACTTTTCAAAGAAAACCTTCTTCCATCTAGAGGAAATAGTAGTTTATTCAGTATTGGACCATCTATAGCAGTCATAGTAATTCTACTAAGTTCTTCAGTAATTCCTTTTAGTTATAATCTTGTTTTAGCTGACCTTAATATCGGTATTTTTTTA…
Brombya platynema	OL591163	0.5909	0.4859	51.0014	ndhH	ATGAGTATACTAGCTAAAGAAAAAGAATTTATGATAGTCAATATGGGACCTCACCACCCATCAATGCACGGTGTTCTTCGTCTCATCGTTACTCTAGATGGTGAAGATGTTATTGACTGTGAACCAATATTGGGTTATTTACACCGAGGGATGGAAAAAATTGCGGAAAACCGAACAATTATACAATATCTGCCTTATGTAACCCGTTGGGATTATTTAGCTACTATGTTCACCGAAGCAATAACTGTAAATGGACCCGAACTGTTGGGAAATATTCAAGTACCTAAAAGGGCCAGCTATATCCGAGTAATTATGTTGGAGTTGAGTCGTATAGCTTCGCATCTGTTATGGCTCGGCCCTTTTATGGCAGATATTGGTGCACAGACTCCTTTCTTCTAT…
Brombya platynema	OL591163	0.5833	0.5821	34.4471	rps15	ATGGTAAAAAATTCATTCGTCTTAGTTATGGTTCAAGAAAAAAAAGAAGAAAACTGTGGATCGGTTGAATTTCAAGTATTCCGTTTCACTAATAAGATACGAAGACTTAGTTCCCATTTAGAATTGCACAGAAAAGACTATTTATCTCAAAGGGGTCTACGAAAAATTTTGGAAAAACGCCAACGTCTCCTAGCGTATTTGTTGAAGAAAAATAGAGTACGTTATAAAGAATTAATTAGTAAGTTGAATATTCGTGAGTCAAAAAATCGTTAA
Brombya platynema	OL591163	0.5136	0.5162	48.2278	ycf1	ATGATTGTTCAATCTTTTATACTAGGGAATCGAGTATCCTTATGCATGAAGATAATCAATTCGGTCGTTGTGGTCGGACTCTATTATGGATTTATGACCACATTCTCCATAGGGCCCTCTTATCTCTTCCTTCTCCGAGCTCGGGTTATGGAAGAAGGAGAAGAAGGAACCGAGAAGAAGGTATCAGCAACAACTGGTTTTATTGCGGGACAGCTCATGATGTTCATATCGATCTATTATGCGCCTCTGCATCTAGCATTGGGTAGACCTCATACAATAACTGTCCTAGCTCTACCGTATCTTTTGTTTCATTTCTTCTGGAACAATCCCAAACACTTTTTTGATTATGGATCTACTACCAGACGTAATCTTAGCATTCAATGTGTATTCCTGAATAAT…
Brombya platynema	OL591163	0.4872	0.5812	44.3734	rps7	ATGTCACGTCGAGGTACTACAGAAGAAAAAGCTGCAAAATCCGATCCAATTTATCGTAATCGCTTAGTTAACATGTTGGTTAACCGTATTCTGAAACACGGAAAAAAATCATTGGCTTATCAAATTATCTATCGAGCCTTGAAAAAGATTCAACAAAAGACAGAAAAAAATCCACTATCCGTTTTACGTCAAGCAATACGTGGAGTAACTCCCGATATAGCAGTAAAAGCAAGACGTGTAGGCGGATCGACTCATCAAGTTCCCATTGAAATAGGATCCGCACAAGGAAAAGCACTTGCCGTTCGTTGGTTATTAGGGGCATCCCGAAAACGTCCGGGTCAAAATATGGCTTTCAAATTAAGTTCCGAATTAGTGGATGCTGCCAAAGGGAGTGGCGAT…
Brombya platynema	OL591163	0.4242	0.4538	51.6506	ndhB	ATGATCTGGCATGTACAGAATGAAAACTTCATTCTCGATTCTACGAGAATTTTTATGAAAGCCTTTCATTTGCTTCTCTTCGATGGAAGTTTTATTTTCCCAGAATGTATCCTAATTTTTGGCCTAATTCTTCTTCTGATGATCGATTCAACCTCTGATCAAAAAGATATACCTTGGTTATATTTCATCTCTTCAACAAGTTTAGTAATGAGCATAGCGGCCCTATTGTTCCGATGGAGAGACGAACCTATGATTAGCTTTTCGGGAAATTTCCAAACGAACAATTTCAACGAAATCTTTCAATTTCTTATTTTACTATGTTCAACTCTATGTATTCCTCTATCCGTGGAGTACATTGAATGTACAGAAATGGCTATAACAGAGTTTCTGTTATTCGTA…
Brombya platynema	OL591163	0.5714	0.6875	39.4211	ycf15	ATGCTACTGCTGAAACATAGAAGAATTGAAATCATAGATCAAAACACTATGTATGGATGGTATGAACTGCTTAAACAAGAATTCTTGAACAGCGAACCACCAGAGCTATTACTAACTACATCAAAAAATTTCCATTAA
Brombya platynema	OL591163	0.5313	0.4426	53.6221	ycf2	ATGAAAGGACATCAATTAAAATCCTGGATTTTCGAATTGAGAGAGATATTGAGAGAGATCAAGAATTCTCACTATTTCTTAGATTCATGGACCCAATTCAATTCAGTGGGATCTTTCATTCACATTTTTTTCCACCAAGAACGTTTTATAAAACTCTTGGACCCACGAATTTGGAGTATCCTACTTTCACGCAATTTACAGGGTTCAACAAGCAATCGATATTTCACGATCAAGGGTGTAGTACTATTTGTAGTAGCGATCCTTATATATCGTATTAACAATCGAAATATGGTCGAAAGAAAAAATCTCTATTTGACAGGGCTTCTTCCTATACCTATGAATTCCATTGGACCCAGAACTGATACATTGGAAGAATCTTTTGGGTCTTCCAATATCAAT…
Brombya platynema	OL591163	0.5714	0.5152	61	rpl23	ATGGATGGAATCAAATATGCAGTATTTACAGACAAAAGTATTCGGTTATTGGGGAAAAATCAATATACTTCTAATGTCGAATCAGGATCAACTAGGACAGAAATAAAGCATTGGGTCGAACTCTTCTTTGGTGTCAAGGTAATAGCTATGAATAGTCATCAACTCCCCCGAAAGGATAGAAGAATGGGACCTATTATGGCACATACAGTGCATTACAGACGTATGATCATTACACTTCAACCGGGTTATTCTATTCCACCTCTCAGAAAGAAAAGAACTTAA
Brombya platynema	OL591163	0.4945	0.5054	55.3492	rpl2	ATGGCGGTACATTTATACAAAACTTCTACCCCGAGCACACGCAATGGAGCCGTAGACAGTCAAGTGAAATCCAATCCACGAAATAATTTGATCTATGGACAGCATCGTTGTGGTAAAGGTCGTAATGCCAGAGGAATCATTACCGCAGGGCATAGAGGGGGAGGTCATAAGCGTCTATACCGTAAAATCGATTTTCGACGGAAGGAAAAAGACATATATGGTAGAATCGTAACCATAGAATACGACCCTAATCGAAATGCATACATTTGTCTCATACACTATGGGGATGGTGAGAAGAGATATATTTTACATCCCAGAGGGGCTATAATTGGAGATACCATTGTTTCTGGTACAGAAGTTCCTATAAAAATGGGAAATGCCCTACCTTTGACCGATATG…
Brombya platynema	OL591163	0.6364	0.4789	46.9597	rps19	GTGACACGTTCACTAAAAAAAAATCCTTTTGTAGTGAATCGTTTATTAAGAAAAATCGATAAGCTTAATACAAAAGCGGAAAAAGAAATAATAATAACTTGGTCTCGGGCATCTACCATTATACCCACAATGGTGGGCCATACTATTGCTATCCATAATGGAAGGGAGCATTTGCCTATTTATATAACAGATCGTATGGTAGGACATAAATTGGGAGAATTTGCGCCCACTATCAATTTTCGTGGACATGCAAAAAATGATAATAGATCCCGTCGTTAA
Brombya platynema	OL591163	0.4737	0.4941	61	rpl22	ATGATAAGGATAATAAAGAAAAAGGTAGAAGTATCTGCTCACAAAGCCCGAAGGGTAATTGATCAGATTCGTGGACGTTCTTACGAGGAAGCCCTTATGATACTCGAACTCATGCCTTATCGAGCATGTTATCCCATTAAAAAATTGGTTTATTCTGCAGCAGCAAATGGTATTCACAATCTGGGTTTCAACGAAGCGAGTTTATTCATTATTAAAGCCGAAGTAAACGAGGGTCCTACTGCGAAAAGATTAAAACCTCGAGCTCGAGGGCGGAGTTCTATGAACAAAAGACGCACTTGTCATATAACTATTGTTTTAAAAGATATCTCATTAGATGAATATGAATATAGGGACTATCTCGACTGCTAA
Chorilaena anceps	OL591221	0.4474	0.5185	53.1506	rps12	ATGCCAACTATTAAACAACTTATTAGAAACCCAAGACAGCCAATCAGAAACGTTACAAAATCCCCCGCTCTTGGGGGATGCCCTCAGCGCCGAGGAACATGTACAAGGGTGTATACTATCACCCCCAAAAAACCAAACTCTGCCTTACGTAAAGTTGCCAGAGTACGATTAACCTCTGGGTTTGAAATCACTGCTTATATACCTGGTATTGGCCATAATTCACAAGAACATTCTGTAGTCTTAGTAAGAGGGGGGAGGGTTAAGGATTTACCCGGTGTGAGATATCACATTGTTCGAGGAACCCTAGATGCTGTCGGAGTAAAGGATCGTCAACAAGGGCGTTCTAGTGCGTTGTAG
Chorilaena anceps	OL591221	0.5417	0.4928	54.6438	rps19	TTGACACGTTCACTAAAAAAAAATCCTTTTGTAGCGAATCATTTATTAAGAAAAATCGATAAGCTTAATACAAAAGCGGAAAAAGAAATAATAATAACTTGGTCCCGGGCATCTACCATTATACCCACAATGGTCGGCCATACTATTGCTATCCATAATGGAAAGGAGCATTTGCCTATTTATATAACAGATCGTATGGTAGGACATAAATTGGGAGAATTTGCGCCCACTATCAATTTCCGTGGACATGCAAAAAATGATAATAGATCCCGTCGTTAA
Chorilaena anceps	OL591221	0.3417	0.3333	33.6224	psbA	ATGACTGCTATTTTAGAGAGACGCGAAAGCGAACGCCTATGGGGTCGCTTCTGTAACTGGATAACCAGCACCGAAAACCGCCTTTACATTGGATGGTTTGGTGTTTTGATGATCCCTACTTTATTGACCGCAACTTCTGTATTTATTATCGCCTTCATTGCTGCCCCTCCAGTCGATATTGATGGTATTCGTGAACCTGTTTCTGGATCTCTACTTTATGGAAACAATATTATTTCTGGTGCGATTATTCCTACTTCTGCAGCTATAGGTTTGCACTTTTACCCGATATGGGAAGCGGCATCTGTTGATGAATGGTTATACAATGGTGGTCCTTATGAACTAATTGTTCTACACTTCTTACTTGGTGTAGCTTGTTACATGGGTCGTGAGTGGGAACTT…
Chorilaena anceps	OL591221	0.5541	0.3994	51.9878	matK	ATGAAGGAATTTCAAGTCTATTTCGAACTAGATAGATCTCAACAACACGACTTGCTATACCCGCTTCTTTTTCGGGAGTATATTTATGCACTTGCTCATGATCATGGTTTAAATAGCTCAACGATTTCATTGGAAAGTGGGGGTTATGACAATAAATCTAGTTCACTGAGTGTGAAACGGTTAATTACGCGAATGTATCAACCGATTTGTTTGAGTATTGCTACTAATGAGTCTAACCAAAATCCTATTTTTTGGCACAACAATAAGTTGGATTCTCGAATTATATCAGAGGGGTTTGCTGTTGTGGCGGAAATTCCATTTTCCCTACGGTTGGTAGCTTTTTTAGAAGGGAAAGAAATTGAAAAATCTCATAATTTTCAATCAATTCATTCAATATTT…
Chorilaena anceps	OL591221	0.5238	0.4265	53.2863	rps16	ATGGTAAAACTTCGTTTGAAACGATGTGGTAGAAAGCAACGTGCCGTTTATCGAATCGTTGCAATTGATGGTAGATCCCGAAGAGAAGGAAGAGATCTTCGGAAAGTGGGTTTTTATGATCCGATAAATAATCAAACCCATTTAAATGTTCCTGCTATTCTATATTTCCTTGACAAGGGCGCCCAACCTACAGGAACCGTTCATGATATTTCAAAGAAAGCGGGGGTTTTTACAGAACTTAGTCTTAATAAAATGAAATTCTATTAA
Chorilaena anceps	OL591221	0.4737	0.3023	37.9365	psbK	ATGTTTAATATCTTTCGTTTAATGTATATCTGTCTTAATTCCGCCCTTTATTCGAGTAGTTTTTTATTCGCCAAATTGCCTGAGGCCTACGCTTTTTTGAATCCAATTGTAGATGTTATGCCGGTAATACCTGTTCTATTTTTTCTCTTAGCCTTTGTTTGGCAAGCTGCTGTAAGTTTTCGATGA
Chorilaena anceps	OL591221	0.25	0.4286	61	psbI	ATGCTTACTCTCAAACTCTTTGTTTACACCGTAGTGATATTCTTTGTTTCTCTCTTCATCTTCGGATTCCTGTCTAATGATCCAGGGCGTAATCCCGGACGCGAAGAATAA
Chorilaena anceps	OL591221	0.4868	0.4888	49.0486	atpA	ATGGCAACAATTAAAGTCGACGAAATTAGTAATATTATCCGTGAACGTATCGAGCAATATAATAGAGAAGTCAAGGTTGTAAATATTGGTACCGTACTTCAAGTAGGCGACGGCATCGCCCGTATTTATGGTCTTGATGAAGTAATGGCAGGTGAATTAGTAGAATTTGAAGAGGGTACAATAGGCATTGCTCTTAATTTAGAATCAAATAATGTTGGTGTCGTTTTAATGGGTGACGGTTTAATGATACAAGAGGGAAGTTCTGTAAAAGCAACCGGAAAAATTGCTCAGATACCAGTAAGCGAGGCTTATTTAGGTCGTGTTATAAATGCCCTGGCTAACCCTATTGATGGTCGAGGTGAAATTTCAGCTTCTGAATCTCGATTAATTGAATCTCCC…
Chorilaena anceps	OL591221	0.6	0.512	47.1199	atpF	ATGAAAAATGTAACCGATTCTTTTGTTTCTTTGGTTCACTGGCCATTCGCCGGGAGTTTCGGGTTTAATACCGATATTTTAGCAACAAATCCAATAAATCTAAGTGTGGTGATTGGTGTATTGATCTTTTTTGGAAAGGGAGTGTTAAGGGATTTATTAGATAATCGAAAACTGAGGATCTTGAATAGTATTCGAAATTCAGAAGAACTGCAGGGCGGGGCCGTTGAACGACTGGAAAAAGCCCGGGCCCGTTTACGGAAAGTCGAAATAGAAGCAGATCAGTTTCGAGTGAACGGATATTCTGAGATAGAACGAGAAAAATTAAATTTGATTAATTCAACTTCTAAGACTTTGGACCAATTCGAAAATTACAAAAATGAAACTATTCGTTTTGAACAA…
Chorilaena anceps	OL591221	0.7391	0.3898	53.3524	atpH	ATGAATCCACTGATTTCTGCCGCTTCCGTTATTGCCGCTGGATTGGCTGTTGGGCTTGCTTCTATTGGACCTGGAGTTGGTCAAGGTACTGCTGCGGGCCAAGCAGTCGAGGGGATTGCGAGACAACCCGAGGCGGAGGGAAAAATACGAGGTACTTTATTGCTTAGTCTGGCTTTTATGGAAGCTTTAACAATTTATGGACTGGTTGTAGCATTAGCGCTTTTATTTGCGAATCCTTTTGTTTAA
Chorilaena anceps	OL591221	0.3699	0.4514	60.1809	atpI	ATGAATGTTCTATCATGCTCCATCAACACACTAAAGGGATTATACGATATATCCGGTGTGGAAGTAGGCCAACATTTCTATTGGCAAATAGGCGGGTTCCAAGTCCATGCCCAAGTACTTATTACTTCTTGGGTTGTAATTGCTATCTTATTAGGTTCAGCCTTTATAGCCGTTCGGAATCCACAAACCGTTCCGACTGCCGGTCAAAATTTCTTCGAATATGTCCTTGAATTCATTCGAGACGTGAGCAAAACTCAAATTGGCGAAGAATATGGCCCATGGGTTCCCTTTATTGGAACTATGTTTCTTTTTATTTTTGTTTCGAATTGGTCAGGTGCTCTTTTACCTTGGAAAATCATAGAGTTACCTCATGGGGAGTTAGCCGCACCCACGAATGAT…
Chorilaena anceps	OL591221	0.5846	0.4419	60.9829	rps2	ATGGCAAGAAGATATTGGAACATCCATTTGGAAGAGATGATGGAAGCAGGAATTCATTTTGGTCATGGTACTCGGAAATGGAATCCTAGAATGGCACCTTATATATCTGCAAAACACAAAGGTATTCATATTACAAATCTTACTCGAACTGCTCGTTTTTTATCAGAAGCTTGTGATTTAGTTTTTGATGCAGCAAGTAGGGGAAAATTATTCTTAATTGTTGGTACTAAAAAGAAAGCTGCTGATTCAGTCGCCCGAGCTGCACTAAGGACTCGGTGTCATTATGTGAATAAAAAATGGCTTGGTGGTATGTTAACGAATTGGTCCACTACAGAAACGAGACTTCACAAGTTCAGGGATTTGAGAACGGAACAAAAAAGGGGGAGACTTGACAGTCTT…
Chorilaena anceps	OL591221	0.5638	0.471	52.1288	rpoC2	ATGGCAGAACGGGCGAGTCTGGTCTTTCACAATAAAATGATAGACGGAACTGCTATTAAACGACTTATTAGCAGGTTAATAGATCACTTCGGAATGGCATATACATCACACATCCTGGATCAAGTAAAGACCCTGGGTTTCCAGCAAGCCACTGCTACATCTATTTCATTAGGCATTGATGATCTTTTAACGATACCTTCGAAGCGATGGCTAGTCCAAGATGCTGAACAACAAAGTCTTATTTTGGAAAAACACCATCATTATGGGAATGTCCACGCGATAGAAAAACTACGTCAATCCATTGAGATATGGTATGCTACAAGTGAATATTTGCGACAAGAAATGAATCCTAATTTTAGGATGACTGATCCCTTTAATCCAGTCCATATAATGTCTTTT…
Chorilaena anceps	OL591221	0.5806	0.4715	48.3478	rpoC1	ATGATTGATCGATATAAACATCAACAACTCCGAATTGGATCAGTTTCTCCTCAAAAAATAAGCGCTTGGGCCAAAAAAATCCTACCTAATGGAGAGATCGTTGGAGAAGTAACAAAACCCTATACTTTTCATTACAAAACCAATAAACCGGAAAAAGATGGATTATTTTGTGAAAGAATTTTTGGGCCTATTAAAAGTGGAATTTGCGCTTGTGGAAATTATCGAATAATCGGAGATGAAAAAGAAGACCCGCAATTTTGTGAACAATGCGGAGTTGAATTTGTTGATTCTCGGATACGAAGATATCAAATGGGATACATAAAACTTGGATGCCCGGTAACCCACGTGTGGTATTTGAAACGTCTTCCTAGTTATATCGCGAATCTTTTAGATAAACCT…
Chorilaena anceps	OL591221	0.6047	0.4877	51.6945	rpoB	ATGCTCGGAGATGCAAATGCGGGAATGTCTACAATACCTGGGTTGAATCAGATACAATTTGAAGGCTTTTGTAGGTTCATTGATCAGGGCTTAACAGAAGAACTTTATAAGTTTCCAAAAATTGCAGATACAGATCAAGAAATTGAATTTCAATTATTTGTGGAAACATATCAATTGGTAGAACCCTTGCGAAAAGAAAGAGATGCGGTATATGAATCATTCACGTATTCTTCTGAATTATATGTATCCGCAGGATTAATTTTGAAAAGCCGAGGGGATATGCAGGAACAAACAATTTTTATTGGAAACATTCCTCTAATGAATTCTTTGGGAACTTCTATAGTAAATGGAATATATAGAATTGTCATCAATCAAATATTGCAAAGTCCCGGTATCTAT…
Chorilaena anceps	OL591221	0.5455	0.5263	29.2857	petN	ATGGATATAGTAAGTCTCGCTTGGGCTGCTTTAATGGTAGTCTTTACATTTTCCCTTTCGCTCGTAGTATGGGGAAGAAGTGGACTCTAG
Chorilaena anceps	OL591221	0.5	0.4074	45.1818	psbM	ATGGAAGTAAATATTCTCGCATTTATTGCTACTACACTGTTCGTTCTAGTTCCTACTGCCTTTTTGCTTATAATATATGTAAAAACGGTCAGTCAAAGTGATTAA
Chorilaena anceps	OL591221	0.456	0.3712	53.2913	psbD	ATGACTATAGCCCTTGGTAAATTTACCAAAGACGAAAAAGATTTATTTGATATTATGGATGACTGGTTACGGAGGGACCGATTCGTTTTTGTAGGTTGGTCCGGTCTATTGCTCTTTCCTTGTGCCTATTTCGCTTTAGGGGGTTGGTTCACAGGCACAACCTTTGTAACTTCATGGTATACCCATGGATTGGCCAGTTCCTATTTGGAAGGCTGCAACTTCTTAACTGCCGCAGTTTCGACTCCTGCTAATAGTTTAGCGCATTCTTTGTTGTTACTATGGGGTCCTGAAGCACAAGGGGATTTTACTCGTTGGTGTCAATTAGGCGGTCTTTGGGCTTTTGTTGCTCTCCACGGTGCTTTCGGACTAATAGGGTTCATGTTACGTCAATTTGAACTT…
Chorilaena anceps	OL591221	0.4965	0.3918	47.9572	psbC	GTGGAAACGCTCTTTAATGGAACTTTATCTGTAGCAGGTCGTGACCAAGAAACCACCGGTTTTGCTTGGTGGGCCGGGAATGCCCGACTTATCAATTTATCCGGTAAACTGCTGGGCGCTCATGTAGCCCATGCTGGATTAATCGTATTCTGGGCCGGAGCAATGAACCTATTTGAAGTGGCTCATTTCGTACCAGAAAAGCCCATGTATGAACAAGGATTAATTTTACTTCCCCACCTAGCTACTCTAGGCTGGGGGGTAGGTCCTGGTGGGGAAGTTATAGACACCTTTCCATACTTTGTATCTGGAGTACTTCACTTAATTTCCTCTGCTGTATTGGGGTTTGGCGGTATTTATCATGCCCTTCTGGGACCTGAAACTCTTGAAGAATCTTTTCCG…
Chorilaena anceps	OL591221	0.5263	0.3636	54.2526	psbZ	ATGACTATTGCTTTCCAATTGGCTGTTTTTGCATTAATTGCTACTTCATCAATCTTACTGATTAGTGTACCCGTTGTATTTGCTTCTCCAGAGGGTTGGTCGAGTAACAAAAATGTCGTATTTTCTGGTACATCAGTGTGGATTGGATTAGTCTTTCTGGTGGGTATCCTTAATTCTCTCATCTCTTAA
Chorilaena anceps	OL591221	0.7273	0.5588	51.2616	rps14	ATGGCAAGGAAAAGTTTGATTCATAGGGAGAAGAAAAGGCAAAAATTGGAACAAAAATATCATTTGATTCGTCGATCCTCAAAAAAAGAAATAAACAAAGTTCCGTCGGTGAGCGATAAATGGAAAATTCATGGAAAGCTACAATCCTCACCACGTAATAGTGCACCTACACGTTTTCATCGACGTTGTTTTTCGACCGGAAGGCCGAGAGCTAACTATCGAGACTTTGGACTATCCGGGCACAAACTTCGTGAAATGGTTCATGCATGTTTGTTGCCGGGGGCAACAAGATCAAGTTGGTAA
Chorilaena anceps	OL591221	0.5492	0.3707	51.4062	psaB	ATGGCATTAAGATTTCCAAGGTTTAGCCAAGGCTTAGCTCAGGACCCCACTACTCGTCGTATTTGGTTTGGTATTGCTACCGCACATGACTTCGAGAGTCATGATGATATTACTGAGGAACGTCTTTATCAGAATATTTTTGCTTCTCACTTCGGGCAATTAGCAATAATTTTTCTGTGGACTTCCGGAAATCTCTTTCATGTAGCTTGGCAAGGAAATTTTGAAGCATGGGTACAGGACCCTTTACATGTAAGACCTATTGCTCATGCTATTTGGGATCCTCATTTTGGTCAACCGGCTGTGGAAGCTTTTTCTCGGGGAGGTGCTCTTGGCCCGGTGAATATCGCTTATTCTGGTGTTTATCAGTGGTGGTATACAATCGGTTTACGCACTAATGAG…
Chorilaena anceps	OL591221	0.5115	0.4172	52.48	psaA	ATGATTATTCGTTCGCCGGAACCAGAAGTAAAAATTTTGGTAGATAGGGATCCCGTAAAAACATCTTTCGAGGAATGGGCCAGACCGGGCCATTTCTCAAGAACCATAGCTAAGGGACCTGATACTACCACTTGGATCTGGAACCTACATGCTGATGCTCACGACTTCGATAGCCATACCAGTGATTTGGAGGAGATCTCTCGAAAAGTATTTAGTGCCCATTTCGGACAACTCTCCATCATTTTTCTTTGGCTGAGCGGCATGTATTTCCACGGTGCTCGTTTTTCCAATTATGAAGCCTGGCTAAGCGATCCTACTCACATTGGACCCAGTGCACAGGTGGTTTGGCCAATAGTGGGCCAAGAAATATTGAACGGTGATGTGGGCGGGGGTTTCCGA…
Chorilaena anceps	OL591221	0.5263	0.4779	49.0186	ycf3	ATGTCTAGATCGCGGATAAATGGAAATTTTATTGATAAGACCTTTTCAATTGTAGCCAATATATTATTACGAATAATTCCGACAACTTTAGGAGAAAAAGAGGCATTTAGCTATTACAGAGATGGTGTGATGTCAGCTCAATCTGAAGGCAATTATGCGGAAGCTTTACAGAATTATTATGAAGCTATGCGACTCGAAATCGATCCCTACGATCGAAGCTATATACTCTATAACATAGGCCTTATCCACACAAGTAACGGAGAACATACAAAAGCTTTAGAATATTATTTTCGGGCACTCGAACGAAATCCATTCTTACCACAAGCTTTTAATAATATGGCTGTGATCTGTCATTACCGGGGAGAACAGGCCGTTCGGCAGGGAGATTCAGAAATTGCG…
Chorilaena anceps	OL591221	0.5273	0.4898	61	rps4	ATGTCACGTTACCGAGGGCCTCGTTTCAAAAAAATACGCCGTCTGGGGGCTTTGCCGGGACTAACGGGTAAAGGGCCTAGGGCCAGAAGCGATTTTAGAAACCAATCGCGCTCCGGAAAAAAATCTCAATATAGAATTCGTTTAGAAGAAAAACAAAAATTGCGTTTTCATTATGGTCTTACAGAACGACAATTACTTAAATATGTTCGTATCGCCGGAAAAGCCAAAGGGTCAACCGGTCTGGTTTTACTACAATTACTTGAAATGCGTTTGGATAACATTCTTTTTCGATTGGGTATGGCTTCAACTATTCCTCAAACCCGCCAATTAATTAACCATCGACATATTTTAGTTAATGGGCGTATAGTCGATATACCAAGTTATCGTTGCAAACCCCGA…
Chorilaena anceps	OL591221	0.6275	0.4167	50.6064	ndhJ	ATGCAGGGTCGTTTGTCTGCTTGGCTAGTTAAGCATGGGATAGTTCATAGATCTTTGGGCTTCGATTACCAAGGAATAGAAACTTTACAAATAAAGCCCGAGGATTGGCATTCCGTTGCTGTCATTTTGTATGTATATGGTTACAATTATCTACGTTCCCAATGTGCCTATGATGTAGCACCGGGTGGGCTGCTAGCCAGTGTGTATCATCTTACGCGAATAAAGTATGGTGTAGATCAACCCGAAGAGATATGCATAAAAGTATTTGCTCCAAGGAGTAATCCTAAAATTCCATCTGTTTTCTGGGTTTGGAAAAGTGCGAATTTTCAAGAACGGGAATCTTATGATATGTTGGGAATCTTTTATGATAATCATCCACGACTGAAACGTATCTTAATG…
Chorilaena anceps	OL591221	0.5224	0.4472	55.9771	ndhK	ATGAATTCCATTGAATTTTCTTTACTTGATCGAACAACCCCAAATTCATTTATTTCAACTACATCAAACGATCTTTCCAATTGGTCAAGACTCTCCAGTTTATGGCCGCTTCTTTATGGTACCAGTTGTTGTTTCATTGAATTTGCTTCATTAATCGGCTCGCGATTCGATTTTGACCGTTATGGGCTGGTACCAAGATCGAGCCCTAGACAGGCGGACCTAATTTTAACAGCTGGTACTGTAACAATGAAAATGGCTCCGTCTTTAGTGAGATTATATGAACAAATGCCTGAACCAAAATATGTTATTGCTATGGGAGCATGTACAATTACAGGGGGGATGTTCAGTACCGATTCGTATAGTACTGTTCGGGGAGTTGATAAGCTAATTCCTGTGGAT…
Chorilaena anceps	OL591221	0.6	0.4186	61	ndhC	ATGTTTCTCCTTTACAAATATGATATTTTCTGGGCATTTCTAATAATATCAAGCGTTATTCCTATTTTGGCATTTCGAATTTCCGCAGTTTTAGCCCCGATTAACAAAGGGCCAGAGAAACTTTCTGGTTATGAATCGGGTATAGAACCAATGGGCGATGCTTGGCTACAATTTAGAATCCGGTATTATATGTTTGCTCTAGTTTTTGTTGTTTTTGATGTTGAAACCGTTTTTCTTTATCCATGGGCAATGAGTTTTGATATATTGGGGGTATCCGTATTTATAGAAGCTTTCATTTTCATGCTTATCCTAATTGTTGGTTCAGTTTATGCGTGGCGAAAAGGAGCATTAGAGTGGTCTTAG
Chorilaena anceps	OL591221	0.5814	0.5	48.8236	atpE	ATGACCTTAAATCTTTGTGTACTGACACCGAATCGAATTGTTTGGGATTCAGAAGTGAAAGAAATCATTTTATCGACCAATAGTGGACAAATAGGCGTATTACCAAATCACGCACCTATTGCCACAGCTGTAGATATAGGTATTTTAAGAATCCGCTTTAACGACCAATGGGTAACGATGGCTCTGATGGGTGGTTTTGCTAGAATAGGGAATAATGAGATCACTATTTTAGTAAATGATGCGGAGAAGAGTAGTGACATTGATCCCCAAGAAGCCCAGCAAACTCTTGAAATAGCGGAAGCTAATTTGAGGAAAGCTGAAAGCAAGAGACAAACAATTGAGGCAAATCTAGCTATCAGACGAGCTAGGACACGAGTCGAGGTTATCAATGCGATTTGA
Chorilaena anceps	OL591221	0.5188	0.4779	51.478	atpB	ATGAGAATAAATCCTACTACTTCCGGCCCCGGGGTTTCCGCGCTTGCAAAAAAAAACCTGGGACATGTCGCTCAAATCATTGGTCCGGTACTGGATGTAGCCTTTCCCCCCGGGAAGATGCCTAATATTTACAATGCTCTAGTAGTTAAGAGTCGAGATACTGCCGGTCAGCCAATTAATGTGACTTGCGAGGTACAGCAATTATTAGGGAATAATCGAGTTCGAGCTGTAGCCATGAGTGCTACAGATGGTCTAACGAGAGGGATGGAAGTAATTGACACGGGAGCTCCTCTAAGTGTTCCAGTCGGCGGAGCAACTCTAGGACGAATTTTCAACGTGCTTGGAGAGCCCGTTGATAATTTAGGTCCTGTAGATACTCGCACAACATCCCCTATTCAT…
Chorilaena anceps	OL591221	0.4675	0.4286	51.8877	rbcL	ATGTCACCACAAACAGAGACTAAAGCGAGTGTTGGATTCAAAGCCGGCGTTAAAGATTATAAATTGACTTATTATACTCCCGACTATGTAACCAAAGATACTGATATCTTGGCAGCATTCCGAGTAACTCCTCAACCCGGAGTTCCGCCCGAGGAAGCGGGGGCTGCAGTAGCTGCGGAGTCTTCTACCGGTACATGGACAACTGTGTGGACCGATGGGCTTACCAGCCTTGATCGTTACAAAGGACGATGCTACAACATTGAGCCCGTTGCTGGAGAAGAAAATCAATATATATGTTATGTAGCTTACCCATTAGACCTTTTTGAAGAAGGTTCTGTTACTAACATGTTTACTTCCATTGTGGGGAATGTATTTGGTTTCAAAGCCCTGCGCGCTCTA…
Chorilaena anceps	OL591221	0.5405	0.3496	48.2454	accD	ATGAAAAAAAGGTGGTTCAATTTGATGTTATCTAAGGGTAAGGGTAAAGGGGAATTAGAATACAGGTGTGGATTAAGTAAATCAATGGATAGCTTTGATCCTATTAAAAATAGTGTAAGCGAGGATCCGATTCGAAATGATAAGGATCAAAACATTCATAGTTCGAGTGATAGTGACTGTTCGAGTTACAGCAATTTAGCGGGTGTCAGGGACATTCATAATTTCATTTCGGATGACACCTTTTTTGTTAAGGATAGTAATAGGGACAACTATTCCATATATTTTGATATTGAAAATCAAATTTTGGAAATAGACAATGATCATTCTTTTCTGAGTGAACTAGAAAGTTTTTTTTATAGCTTTCGTAATTATAGTTCTAGGAATACTGGATCCAAAAGT…
Chorilaena anceps	OL591221	0.5833	0.4231	61	psaI	ATGACAATTCTCAATAGCTTTCCCTCCATTTTAGTGCCTTTAGTGGGCCTAGTATTTCCGGCAATGGCAATGGCTTCTTTATTTCTTTATCTTGAAAAAAATAAGATTTTTTAA
Chorilaena anceps	OL591221	0.5469	0.4298	54.2566	ycf4	ATGAGTTGGCGATCAGAATATATATGGATAGAATTTATAGCAGGCTCTCGCAAAACAAGCAATTTCTGCTGGGCCCTTATCCTTTTTTTAGGTTCATTAGGATTTTTAGTGGTTGGAATTTCTAGTTATCTTGATAGGAATTTGCTATCTTTATTTCCGTCTCAGCAAATAAAATTTTTTCCACAAGGGATCGTGATGTCTTTCTACGGGATCGCGGGTCTCTTTATTAGTTCCTATTTGTGGTGCACAATTATATGGAATGTAGGTAGCGGTTATGATCGATTTGATACAAAAGAGGGAATAGTGTGTATTTTTCGTTGGGGATTTCCTGGAAAAAATCGCCGCATCTTTCTACGATTCCTTGTGAAAGATATTCAGTCCATCAGAATAGAAGTTAAA…
Chorilaena anceps	OL591221	0.4675	0.4241	55.9211	cemA	ATGACAAAAAAAAAAACGAACGCATCCATTCCCCTTAGATATCTTTCATCTATAATATTTGTAGTATTTTTGCCCTGGTGGATCCCTCCCTCATTTAATAAAAATCTGGAATCCTGGGTTACTAATTGGTGGAATACTAGTCAACCCGAAACCTTTTTGAATGATATTCAAGAAAAAGCTATTCTAGAAAAATTCATAGAATTCGAGGAATTATTCTTCTTGGACGAAATGATAAAGGAATTTACGGAAAGACGTCTAGAAAAGCTTCGTATAGGGCTCTCGAAAGAAACAATTCAATTAATCAAGATGCACGATGAGGATCATATCCATACGATTTTTCACTTCTCGACAAATACAATCTGCTTCGTTAGTCTAAGCGGTTATTCGATTCTGTGTAAT…
Chorilaena anceps	OL591221	0.5652	0.4417	61	petA	ATGCAAATTCGAAATACCTTTTCTTCGTTAAAGGAAGAGATTACTCGATTCATTTCCGTATCCCTCATGATATGTATAATAACTCAGGCATCAATTTCAAATGCATATCCCGTTTTTGCGCAGCAGGGTTTTGAAAATCCACGAGAGGCAACTGGTCGCATTGTATGCGCCAATTGTCATTTAGCTAATAAGCCCGTGGATATTGAGGTTCCACAGGCGGTACTCCCTGATACTGTATTTGAAGCAGTTGTTAGAATTCCGTATGATATGCAACTGAAACAAGTTCTTGCTAATGGTAAAAAGGGGTCTTTGAACGTGGGGGCCGTTCTTATTTTACCAGAGGGGTTTGAATTAGCCCCCTCCGACCGTATTTCGCCCGAGATGAAAGAAAAGATAGGC…
Chorilaena anceps	OL591221	0.5	0.3333	22.9529	psbJ	ATGGCCGATACTACTGGAAGGATTCCCCTTTGGATAATAGGTACTGTAACTGGTATTCCTGTGATCGGTTTAATAGGTATTTTCTTTTATGGTTCATATTCCGGATTAGGCTCGTCCTTGTAG
Chorilaena anceps	OL591221	0.3333	0.4583	61	psbL	ATGACACAATCAAATCCGAACGAACAAAATGTTGAATTGAACCGTACCAGTCTCTACTGGGGGTTATTACTCATTTTTGTACTTGCTGTTTTATTTTCCAATTACTTCTTCAATTAA
Chorilaena anceps	OL591221	0.5333	0.64	61	psbF	ATGACCATAGACCGAACCTATCCAATTTTTACAGTGCGATGGTTAGCTGTGCACGGACTAGCTGTACCTACCGTTTCTTTTTTGGGGTCAATATCAGCAATGCAGTTCATCCAACGATAA
Chorilaena anceps	OL591221	0.3793	0.4	53.1707	psbE	ATGTCTGGAAGCACAGGAGAACGTTCTTTTGCTGATATTATTACCAGTATTCGATACTGGGTCATTCATAGCATTACTATACCTTCCCTATTCATTGCGGGTTGGTTATTCGTCAGCACGGGGTTAGCTTACGATGTGTTTGGAAGCCCTCGTCCAAACGAGTATTTTACAGAGAGCCGACAAGGAATTCCATTAATAACCGGCCGTTTTGATTCTTTGGAACAACTCAACGAATTTAGTAGATCTTTTTAG
Chorilaena anceps	OL591221	0.8	0.3333	36.7143	petL	ATGCCTACTATAACTAGTTATTTTGGTTTTCTCCTAGCAGCTTTAACTATAACTTCGGCTCTATTTATTGGTCTGAGTAAGATAGGACTTATTTGA
Chorilaena anceps	OL591221	0.3636	0.4815	61	petG	ATGATTGAAGTCTTTCTATTTGGAATCGTCTTAGGTCTAATTCCTATTACTTTGGCTGGATTATTCGTAACCGCATATTTACAATACAGACGTGGTGATCAGTTGGACCTTTGA
Chorilaena anceps	OL591221	0.6667	0.5667	61	psaJ	ATGCGAGATCTAAAAACATATCTTTCCGTGGCACCGGTACTAAGTACTCTATGGTTCGGGTCTTTAGCAGGGTTATTGATAGAAATTAATCGTTTATTCCCGGACGCATTGACATTTCCTTTTTTTTCATTCTAG
Chorilaena anceps	OL591221	0.6667	0.4082	33.72	rpl33	ATGGCCAAGGGTAAAGATGTCCGAGTAAGGGTTATTTTGGAATGTATTAGTTGTGTTCGAAACGGTGTTAATAAGGAATTAAGGGGTATTTCCAGATATATTACTCAAAAGAATCGACATAATACACCTAGTCGATTGGAATTGAGAAAATTCTGTCTTTATTGTTACAAACATACACTTCATGGGGAGATAAAAAAATAG
Chorilaena anceps	OL591221	0.64	0.4935	61	rps18	ATGGATAAAACCAAGCGACTCTTTCTTAAAACCAAGCGATCTTTTCGTAGGCGTTTGCCCCCGATTGTATCGGGGGATCAAATTGATTATAGAAACATGACTTTAATTAATCGATTTCTTAGTGAACAAGGAAAAATATTATCTAGACGGGTGAATAGATTGACCTTAAAAGAACAACGATTAATTACTATTGCTATAAAACAAGCTCGTATTTTATCTTCGTTACCTTTTCTTAATAATGACAAACAATTTGAAAGAAGTGGGTCGATCACTAGAACTCCAGGTCTTCGAACCAGAAAAAAATAG
Chorilaena anceps	OL591221	0.6667	0.4792	51.4091	rpl20	ATGACCAGAATTAGACGAGGATATATAGCTCGGAGACGTAGAACAAAAATGCGTTTATTTGTATCAAGCTTTCGCGGGGCTCATTCAAGACTTAGTCGAACAAGTACTCAACAGAAAATAAGAGCTTTGGTTTCGGCTCATCGTGATAGAGATAGACAAAAAAGGGATTTTCGTCGTTTATGGATCACTCGAATAAATGCAGTAATTCGCGTAAATATGGTATCCTTTATTTATAGTAGATTAATACACAATCTGTATAAGGCGCAGTTGGTTCTTAATCGTAAGATACTTGCACAAATAGCTATCTCAAATAGTAATTGTCTTTATATGATTTCCAATGAGATCCTAAAAAAGGAAATTGGAAGGAGTCCATTATAA
Chorilaena anceps	OL591221	0.3793	0.4754	59.7207	rps12	CTACAACGCACTAGAACGCCCTTGTTGACGATCCTTTACTCCGACAGCATCTAGGGTTCCTCGAACAATGTGATATCTCACACCGGGTAAATCCTTAACCCTCCCCCCTCTTACTAAGACTACAGAATGTTCTTGTGAATTATGGCCAATACCAGGTATATAAGCAGTGATTTCAAACCCAGAGGTTAATCGTACTCTGGCAACTTTACGTAAGGCAGAGTTTGGTTTTTTGGGGGTGATAGTATGCCAACTATTAAACAACTTATTAGAAACCCAAGACAGCCAATCAGAAACGTTACAAAATCCCCCGCTCTTGGGGGATGCCCTCAGCGCCGAGGAACATGTACAAGGGTGTAT
Chorilaena anceps	OL591221	0.5	0.4922	61	clpP1	ATGCCTATTGGTGTTCCAAAAGTACCTTATAGAAGTCCCGGGGACAAGCATCCATCTTGGGTTGACATCAACCGACTTTATCGAGAAAGATTACTTTTTTTAGGTCAAATGGTTGAGAGTGATATCTCCAATCAACTTATTGGTATTATGGTATATCTCAGTATAGAGAACGAGACCAAGGATTTGTATTTATTTATCAACTCTCCCGGCGGATGGGTAATACCCGGAATAGCAATTTATGATACTATGCAATTTGTGCGACCAGATGTACAGACAATATGCATGGGATTGGCTGCCTCCATGGGGTCTTTTCTCCTGGCCGCAGGAGCAAGTACCAAACGTCTAGCATTCCCTCACGCTAGGGTCATGATCCATCAACCTATTGGTGCTTTTTATGGG…
Chorilaena anceps	OL591221	0.5346	0.4114	50.188	psbB	ATGGGTTTGCCTTGGTATCGTGTTCATACCGTCGTATTGAATGATCCCGGTCGTTTGATTGCTGTCCATATAATGCATACAGCCCTGGTTGCGGGTTGGGCCGGTTCAATGGCTCTATATGAATTAGCTGTTTTTGATCCCTCCGATCCAGTTCTTGATCCAATGTGGAGACAAGGCATGTTCGTTATACCCTTCATGACCCGTTTAGGAATAACCGATTCATGGGGCGGTTGGAGTATTACGGGGGGGACGGTAACGAATCCGGGTATTTGGAGTTACGAAGGTGTAGCCGGGGCACATATTGTGTTTTCGGGCTTGTGCTTCTTGGCAGCTATCTGGCATTGGGTGTATTGGGATCTAGCAATATTTGTTGATGACCGTACGGGAAAACGCTCTTTG…
Chorilaena anceps	OL591221	0.4545	0.5217	43.1429	psbT	ATGGAAGCATTGGTTTATACATTCCTCTTAGTCTCGACTCTAGGGATCATTTTTTTCGCTATCTTTTTTCGAGAACCGCCTAAAGTTCCAACTAAAAAATGA
Chorilaena anceps	OL591221	0.4118	0.5556	61	psbN	ATGGAAACAGCAACCCTAGTCGCCATCTCTATATCTGGGTTACTTGTAAGTTTTACTGGGTACGCCTTATATACTGCTTTTGGGCAACCCTCTCAACAACTAAGAGATCCATTCGAGGAACACGGGGACTAG
Chorilaena anceps	OL591221	0.8333	0.4	61	psbH	ATGGCTGCACAAACAGTTGAGGGTAGTTCTCGAGCTCGTCCAAAAATGACTTCTGCGGGGGGGTTATTGAAACCTTTGAATTCAGAATATGGTAAAGTAGCTCCTGGATGGGGAACTACTCCTTTGATGGGTATCGCAATGGCTCTATTTGCGATATTCCTGTCTATTATTTTGGAGATTTATAATTCGTCCGTTTTACTGGACGGAATTTCAATGAATTAG
Chorilaena anceps	OL591221	0.5672	0.4228	53.0104	petB	ATGAGTAAAGTATACGATTGGTTCGAAGAACGTCTCGAGATTCAGGCGATTGCAGATGATATAACTAGTAAATACGTTCCTCCTCATGTCAACATATTTTATTGTCTAGGAGGAATTACGCTTACTTGTTTTTTAGTCCAAGTAGCTACAGGGTTTGCTATGACTTTTTACTACCGTCCGACCGTTACTGAGGCTTTTGCTTCTGTTCAATACATAATGACGGAAGCTAGCTTTGGTTGGTTAATCCGATCAGTTCATCGATGGTCGGCAAGTATGATGGTCCTAATGATAATTCTGCACGTATTTCGTGTGTATCTCACTGGTGGTTTTAAAAAACCTCGCGAATTGACTTGGGTTACAGGCGTGGTTCTGGCTGTATTGACCGCATCTTTTGGTGTA…
Chorilaena anceps	OL591221	0.5714	0.4958	43.8335	petD	ATGGGAGTAACAAAAAAACCTGACTTGAACGATCCTGTATTAAGGGCTAAGTTGGCTAAAGGTATGGGTCATAATTATTATGGAGAACCCGCATGGCCCAATGATCTTTTATATATTTTTCCAGTAGTAATTCTAGGTACTATTGCATGTAACGTGGGCTTAGCGGTTCTAGAACCATCAATGATTGGTGAACCCGCGGATCCGTTTGCAACTCCTTTGGAAATATTACCCGAATGGTATTTCTTTCCTGTATTTCAAATACTTCGTACAGTACCCAATAAACTGTTGGGTGTTCTTTTAATGGTTTCAGTACCTGCGGGATTATTAACAGTACCCTTTTTGGAAAATGTTAATAAATTCCAAAATCCATTTCGCCGTCCAGTAGCGACAACCGTCTTT…
Chorilaena anceps	OL591221	0.5258	0.4847	54.3159	rpoA	ATGGTTCGAGAGAAAGTCAAAGTATCTAACGGGACACTACAGTGGAAGTGTGTTGAATCAAGAGCAGACAGTAAGCGTCTTTATTATGGACGCTTTATTTTGTCTCCACTTATGAAGGGTCAAGCCGACGCAATAGGCATTGCGATGCGAAGAGTTTTGCTTGGAGAAATAGAAGGAACGTGTATTACACGCGCAAAATTTGGGAAAATCCCACATGAATATTCTACCATAATGGGTATTCAAGAATCGGTACATGAAATTTTAATGAATTTGAAAGAAATTGTATTGAGAAGTAATCTTTATGGAATTTGTGACGCGCTTATTTGTGTCAAAGGTCCGAGATATGTAACTGCTCAAGACATCCTCTTGCCACCTTCTGTGGAAATCGTTGATAAGACG…
Chorilaena anceps	OL591221	0.5366	0.4898	61	rps11	ATGGCAAAATCTACAACAAGAAGTGGTTCACGTAGGACTGGACGGGTTGGTTCGCGTAAAAGTGTACGTCGAATACCAAAGGGCGTTATTCATGTTCAAGCAAGTTTCAACAACACCATTGTGACTGTTACGGATGTACGGGGTCGGGTAATTTCTTGGTCCTCGGCCGGTACTTGTGGATTCAGGGGTACAAGAAGAGGTACACCCTTTGCTGCTCAAACCGCAGCGGGAAGCGCTATTAGAGCAGTAGCGGATCAAGGTATGCAACGAGCAGAAGTCATGATAAAGGGTCCTGGTCCCGGAAGAGATGCAGCATTACGAGCTATTCGTAGAAGCGGTATCCTTTTAAATTTCGTACGGGATGTAACCCCTATGCCACATAATGGTTGCAGACCCCCT…
Chorilaena anceps	OL591221	0.6154	0.64	22.75	rpl36	ATGAAAATAAGGGCTTCCGTTCGGAAAATTTGTGAAAAATGTCGACTGATCCGCAGGAGGGGACGGATTATAGTAATTTGTTCCAACCCGAGACATAAACAAAGACAAGGATAA
Chorilaena anceps	OL591221	0.5	0.5368	47.4371	rps8	ATGGGCAAGGATACTATTGCTGACATAATAACTTGTATACGAAATGCTGACATGAATCGAAAAGGAACGGTTCGAATAGCATCTACTAACATCACCGAAAACTTTGTTAAAATACTTTTGCGAGAGGGTTTTGTAGAAAACGTAAGGAAACTTGTGGAAAACAAAAAAGAGTTTTTGGGTTTAACCCTACGACATAGAAGGAATAGGAAAGGACCGTATAGACCCTGTTTAAATTTAAAACGAATCAGTCGACCCGGTCTACGAATCTATTTTAACTATGAACGAATTCCTAGAATTTTAGATGGGATGGGGGTTGTAATTCTCTCTACTTCTCGAGGTATAATGACAGACCGAGCGGCTCGACTCGAAAGAATCGGCGGAGAAATTTTGTGTTATATA…
Chorilaena anceps	OL591221	0.4545	0.5	51.5084	rpl14	ATGATTCAACCTCAAACCCATTTGAACGTAGCGGACAATAGCGGTGCCCGAGAATTGATGTGTATTCGAATCATAGGAGCCGGTAATCGTAGATATGCTCATATTGGTGACGTTATTGTTGCTGTGATCAAGGAAGCAGTACCAAATACACCTCTAGAAAGATCCGAAGTGATCAGAGCTGTAATTGTACGTACTTGTAAAGAACTCAGACGAGATAACGGTATGATAATACGTTATGATGACAACGCTGCAGTTGTCATTGATCAAGAAGGAAATCCAAAGGGAACTCGAGTTTTTGGTGCGATCGCCCGAGAATTGAGACAGTTGAATTTTACTAAAATAGTTTCATTAGCGCCTGAAGTATTATAA
Chorilaena anceps	OL591221	0.5122	0.5833	56.8305	rpl16	ATGCTTAGTAACCCGAAAAGAACAAGATTCCGTAAACAACATAGAGGAAGAATGAAAGGAATATCTTATCGAGGGAATCATATTAGTTTCGGCAGATATGCTCTTCAAGCACTTGAACCCGCTTGGATCACATCTAGACAAATCGAAGCAGGGCGCCGAGCAATGACACGAAATGTACGGCGTGGTGGAAAAATATGGGTACGTATATTTCCAGACAAACCAGTTACAGTAAGACCCACGGAAACCCGTATGGGGTCCGGGAAAGGATCCCCCGAATATTGGGTAGCCGTCGTTAAACCGGGTAGAATCCTTTATGAAATGAGTGAAGTTGCTGAAAATATCGCTCGAAGGGCTATTTCAATAGCGGCGTCCAAAATGCCTATAAGAACTCAATTCATT…
Chorilaena anceps	OL591221	0.4694	0.5731	42.213	rps3	ATGGGACAAAAAATAAATCCACTTGGTTTTCGACTTGGTACAACACAAAGTCATCATTCGCTTTGGTTTGCAAAATCAAAAAATTATTGCGACGGTCTACAAGAGGATCAAAAAATACGAAACATTCTTAAGAATTATGTACAAAAAAATATGATAATATCCTCCGGTCTTGAGGGAATTGCCCGGATAGAGATTCAAAAAAGAATTGATCTAATTCAAGTCATAATATATATAGGATTCCCAAAATTTTTACTAGAAAATAAGCCGCGAAGAGTTGAAGAATTGCAGATGAATGTACAAAAAGAACTTAATTGTGTGAACCGAAAAATAAACATTGCTATTACAAGAATTGCAAATCCTTATGGACACCCCAATATTCTTGCCGAATTTATAGCCGGC…
Chorilaena anceps	OL591221	0.5	0.5081	55.4749	rpl2	ATGGCGGTACATTTATACAAAACTTCTACCCCGAGCACACGCAATGGAGCCGTAGACAGTCAAGTGAAATCCAATCCACGAAATAATTTGATCTATGGACAGCATCGTTGTGGTAAAGGTCGTAATGCCAGAGGAATCATTACCGCAGGGCATAGAGGGGGGGGTCATAAGCGTCTATACCGTAAAATCGATTTTCGACGGAAGGAAAAAGAAAAAGACATATATGGTAGAATCGTAACCATAGAATACGACCCTAATCGAAATGCATACATTTGTCTCATACACTATGGGGATGGTGAGAAGAGATATATTTTACATCCCAGAGGGGCTATAATTGGAGATACCATTGTTTCTGGTACAGAAGTTCCTATAAAAATGGGAAATGCCCTACCTTTGACC…
Chorilaena anceps	OL591221	0.5926	0.5075	61	rpl23	ATGGATGGAATCAAATATGCAGTATTTACAGACAAAAGTATTCGGTTATTGGGGAAAAATCAATATACTTCTAATGTCGAATCAGGATCAACTAGGACAGAAATAAAGCATTGGGCCGAACTCTTCTTTGGTGTCAAGGTAATAGCTATGAATAGTCATCAACTCCCCCGAAAGGGTAGAAGAATGGGACCTATTATGGCACATACAATGCATTACAGACGTATGATCATTACACTTCAACCGGGTTATTCTATTCCACCTCTTAGAAAGAAAAGAACTTAA
Chorilaena anceps	OL591221	0.5318	0.4374	53.4821	ycf2	ATGAAAGGACATCAATTCAAATCCTGGATTTTCGAATTGAGAGAGATATTGAGAGAGATCAAGAATTCTCACTATTTCTTAGATTCATGGACCCAATTCAATTCAGTGGGATCTTTCATTCACATTTTTTTGCACCAAGAACGTTTTATAAAACTCTTGGACCCACGAATTTGGAGTATCCTACTTTCACGCAATTCACAGGGTTCAACAAGCAATCGATATTTCACGATCAAGGGTGTAGTACTTTTTGTAGTAGCGATCCTTATATATCGTATTAACAATCGAAATATGGTCGAAAGAAAAAATCTCTATTTGACAGGGCTTCTTCCTATACCTATAAATTCCATTGGACCCAGAACTGATACATTGGAAGAATCCTTTGGGTCTTCCAATATCAAT…
Chorilaena anceps	OL591221	0.5714	0.6875	46.5263	ycf15	ATGCTACTGCTGAAACATAGAAGAATTGAAATCTTAGATCAAAACACTATGTATGGATGGTATGAACTGCTTAAACAAGAATTCTTGAACAGCGAACCACCAGAGCTATTACTAACTACATCAAAAAATTTCCATTAA
Chorilaena anceps	OL591221	0.5	0.5763	44.6844	rps7	ATGTCACGTCGAGGTACTACAGAAGAAAAAGCTGCAAAATCCGATCCAATTTATCGTAATCGCTTAGTTAACATGTTGGTTAACCGTATTCTGAAACACGGAAAAAAATCATTGGCTTATCAAATTATCTATCGAGCCTTGAAAAAGATTCAACAAAAGACAGAAAAAAATCCACTATCTGTTTTACGTCAAGCAATACGTGGAGTAACTCCCGATATAGCAGTAAAAGCAAGACGTGTAGGCGGATCGACTCATCAAGTTCCCATTGAAATAGGATCCGCACAAGGAAAAGCACTTGCCGTTCGTTGGTTATTAGGGGCATCCCGAAAACGTCCGGGTCGAAATATGGCTTTCAAATTAAGTTCCGAATTAGTGGATGCTGCCAAAGGGAGTGGCGAT…
Chorilaena anceps	OL591221	0.9444	0.5	34.8628	rpl32	ATGGCAGTTCCAAAAAAACGTACTTCTATATTAAAAAAACGTATTCGTAAGAATATTTGGAAAAAAGGGGGGGGTTGGGCGGCGTTGAAGGCTTTTTCGTTAGCGAAATCCCTTTCTACTGGGAATTCAAAAAGTTTTTTTGGAAAGCAAAGAAATAAGAAAACGTTGGAATAA
Chorilaena anceps	OL591221	0.5053	0.4753	53.4716	ccsA	ATGATCTTTTCAACTTTAGAGCATATATTAACGCATATATCCTTTTCGGTCGTTTCAATTGGAATTCCAATGTATTTACTAGCCTTATTAGTCGATGAAATAAGAGGACTATATAATTCATCAGAAAAGGGGATGATAGCTACCGCTTTCTGTCTAACAGGATTATTAATCACCCGTTGGATTTACTCTAGGCATTTCCCATTAAGTGATTTATATGAATCATTAATCTTTCTTTCATGGAGTTTCTCCATTATTCATAGGATTTTCTATTTTAAAAATAATAAAAATCATTTAAGCGCTATAACGGCACCAAGTGCTATTTTTACCCAAGGCTTTGCTACTTCGGGGTTTTTAACCAAAATGCATCAATCCGGAATATTAGTACCCGCTCTCCAAGTC…
Chorilaena anceps	OL591221	0.4717	0.4615	50.9991	ndhD	ATTGTAGTTTTTCCCATAGCCGCGGGTTCTTTAATTTTCTTTCTCCCTCATAGAGGCAATAAGGTGACTAGAGGATATACAATATATATATGTGTCTTAGAACTCCTTCTAACGACCTATGCATTTTGTTATAATTTCCAATTGGACGATCCATTAATCCAGCTGGAAGAGGATTATAAATGGATTACCTTTTTTGATTTTGACTGGCGGTTGGGAATAGATGGACTTTCCATGGGACCCATTTTACTGACGGGATTTATCACTACTTTAGCTACTTTAGCGGCTCGGCCAGTTACTCGGAATTCCCGACTATTCCATTTCTTGATGTTAGCAATGTACAGCGGTCAAATAGGACCATTTTCTTCTCGAGACCTTTTACTTTTTTTCATCATGTGGGAA…
Chorilaena anceps	OL591221	0.5833	0.4483	31.8032	psaC	ATGTCACATTCAGTAAAGATTTATGATACATGTATAGGGTGTACTCAATGTGTCCGAGCTTGCCCCACAGATGTATTAGAAATGATCCCTTGGGACGGGTGTAAAGCAAAGCAAATTGCTTCTGCTCCAAGAACAGAGGATTGTGTTGGTTGTAAGCGATGCGAATCCGCCTGTCCAACGGATTTCTTGAGTGTTCGGGTTTATTTATGGCATGAAACAACTAGAAGCATGGGTCTAGCTTATTGA
Chorilaena anceps	OL591221	0.5312	0.3571	61	ndhE	ATGATGCTCGAGCATGTACTTGTTTTGAGTGCCTATTTATTTTCTATTGGTATCTATGGATTGATTACGAGCCGAAATATGGTTCGGGCCCTGATGTGTCTTGAACTTCTAGTAAATGCAGTTAATATCAATTTCGTAACATTCTCTGATTTTTTTGATAGTCGACAATTAAAAGGAGATATTTTCTCAATTTTTGTTATAGCTATTGCAGCCGCCGAAGCCGCTATCGGATCAGCTATTGTTTCGTCAATTTATCGTAACAGAAAATCGACTCGTATCAATCAATCGACTTTGTTGAATAAGTAG
Chorilaena anceps	OL591221	0.52	0.3798	58.3522	ndhG	ATGGATTTGCCTGGACCAATACATGATTTTCTTTTAGTTTTTCTGGGCTCGGGTCTTATATTAGGAGGTTTGGGAGTGGTATTATTTACCAACTCGATTTATTCTGCCTTTTCCTTGGGATTGGTTCTTGTTTGTATATCCTTATTCTATATTCTATCAAATTCCCATTTTGTAGCTGCTGCGCAACTCCTTATTTACGTGGGAGCTGTAAACGTTTTAATCATATTTGCTGTAATGTTCATGAATGGTTCAGACTATTCCAAAGATTTTCTTTTGAATTTTTGGACTGTTGGTGAAGGACTTACTTTCCTGGTTTGTACAAGTATTTTTTTTTCGCTAATCACTACTATTCTAGATACGTCGTGGTACGGGATTATTTGGACTACACGACCCAACCAG…
Chorilaena anceps	OL591221	0.5588	0.4254	40.3501	ndhI	ATGTTCCCTATGGTAATTGGTTTCATGAATTCTGGTCAACAAACAATACGAGCTGCAAGGTACATCGGTCAAAGTTTCATGATTACTTTATCCCAAGCAAATCGTTTACCTGTAAGTATTCAATATCCTTATGAAAAATTAATAACATCGGAACGTTTTCGCGGTCGAATACATTTTGAATTTGATAAATGTATTGCTTGTGAAGTATGTGTTCGTGTATGCCCTATAGATTTGCCTGTTGTTGATTGGAAATTTGAAACAAATATTCGAAAGAAACGATTGCTTAATTACAGTATTGATTTTGGAATTTGTATTTTTTGTGGTAACTGTGTTGAGTATTGTCCAACAAATTGTTTATCAATGACTGAAGAATATGAACTTGCTACTTACGACCGTCAC…
Chorilaena anceps	OL591221	0.5114	0.5072	49.3648	ndhA	ATGATAATTGATACAACAAAAGTACAAGATATCAATTCTTTTTCCAGATTGGAATCCCTGCAAGAGGTCTATGGGATCATGTGGGTGCTTGCCCCTATTTCGACTCCGGTAGTGGCAATCACAATAGGTGTCCTAGTAATTGTGTGGTTAGAAAGAGAAATATCGGCAGGAATACAACAACGTATTGGGCCTGAATACGCCAGTCCCTTGGGAATTCTTCAAGCTTTAGCAGATGGGACAAAACTACTTTTAAAAGAAAACCTTCTTCCATCTAGAGGAAATAGTAGTTTATTCAGTATTGGACCATCTATAGCAGTCATAGCAATTCTACTAAGTTCTTCAGTAATTCCTTTTAGTTATAACCTTGTTTTAGCTGACCTCAATATCGGTATTTTTTTA…
Chorilaena anceps	OL591221	0.6019	0.4755	49.9321	ndhH	ATGAGTATACTAGCTACAGAAAAAGAATTTATGATAGTCAATATGGGACCTCACCACCCATCAATGCACGGTGTTCTTCGTCTTATCGTTACTCTAGATGGTGAAGATGTTATTGACTGTGAACCAATATTGGGTTATTTACACCGAGGGATGGAAAAAATTGCGGAAAACCGAACAATTATACAATATCTGCCTTATGTAACCCGTTGGGATTATTTAGCTACTATGTTCACCGAAGCAATAACTGTAAATGGACCCGAACTCTTGGGAAATATTCAAGTGCCCAAAAGAGCCAGCTATATCCGAGTAATTATGTTGGAGTTGAGTCGTATAGCTTCCCATCTGTTATGGCTTGGCCCTTTTATGGCAGATATTGGTGCACAGACTCCTTTCTTCTAT…
Chorilaena anceps	OL591221	0.625	0.6119	50.1822	rps15	ATGGTAAAAAATTCATTCGTCTCAGTTATGTTTCAAGAAAAAAAAGAAGAAAACTGTGGATCGGTTGAATTTCAAGTATTACGTTTCACTAATAAGATACGGAGACTTACTTTACATTTAGAATTACACAGAAAAGACTATTTATCTCAAAGGGGTCTACGGAAATTTTTGGAAAAACGCCAACGTCTACTAGTGTATTTGTCCAAGAAAAATAGAGTACGTTATAAAGAATTAATTAGTAAGTTGAATATCCGGGAGTCAAAAAATCGTTAA
Chorilaena anceps	OL591221	0.5113	0.5189	47.8199	ycf1	ATGATTGTTCAATCTTTTATACTAGGGAATCGAGTATCCTTATGCATGAAGATAATCAATTCGGTCGTTGTGATCGGACTCTATTATGGATTTTTGACCACATTCTCCATAGGGCCCTCTTATCTCTTCCTTCTCCGAGCTCGGGTTATGGAAGAAGGAGAAGAAGGAACCGAGAAGAAGGTATCAGCAACAACTGGTTTTATTGCGGGACAGCTCATGATGTTCATATCGATCTATTATGCGCCTCTGCATCTAGCATTGGGTAGACCTCATACAATAACTGTCCTAGCTCTACCGTATCTTTTGTTTCATTTCTTCTGGAACAATCCCAAACACTTTTTTGATTATGGATCTACTACCAGACGTAATCTTAGCATTCAATGTGTATTCCTGAATAAT…
Chorilaena anceps	OL591221	0.5	0.5763	44.6844	rps7	ATGTCACGTCGAGGTACTACAGAAGAAAAAGCTGCAAAATCCGATCCAATTTATCGTAATCGCTTAGTTAACATGTTGGTTAACCGTATTCTGAAACACGGAAAAAAATCATTGGCTTATCAAATTATCTATCGAGCCTTGAAAAAGATTCAACAAAAGACAGAAAAAAATCCACTATCTGTTTTACGTCAAGCAATACGTGGAGTAACTCCCGATATAGCAGTAAAAGCAAGACGTGTAGGCGGATCGACTCATCAAGTTCCCATTGAAATAGGATCCGCACAAGGAAAAGCACTTGCCGTTCGTTGGTTATTAGGGGCATCCCGAAAACGTCCGGGTCGAAATATGGCTTTCAAATTAAGTTCCGAATTAGTGGATGCTGCCAAAGGGAGTGGCGAT…
Chorilaena anceps	OL591221	0.5714	0.6875	46.5263	ycf15	ATGCTACTGCTGAAACATAGAAGAATTGAAATCTTAGATCAAAACACTATGTATGGATGGTATGAACTGCTTAAACAAGAATTCTTGAACAGCGAACCACCAGAGCTATTACTAACTACATCAAAAAATTTCCATTAA
Chorilaena anceps	OL591221	0.5318	0.4374	53.4821	ycf2	ATGAAAGGACATCAATTCAAATCCTGGATTTTCGAATTGAGAGAGATATTGAGAGAGATCAAGAATTCTCACTATTTCTTAGATTCATGGACCCAATTCAATTCAGTGGGATCTTTCATTCACATTTTTTTGCACCAAGAACGTTTTATAAAACTCTTGGACCCACGAATTTGGAGTATCCTACTTTCACGCAATTCACAGGGTTCAACAAGCAATCGATATTTCACGATCAAGGGTGTAGTACTTTTTGTAGTAGCGATCCTTATATATCGTATTAACAATCGAAATATGGTCGAAAGAAAAAATCTCTATTTGACAGGGCTTCTTCCTATACCTATAAATTCCATTGGACCCAGAACTGATACATTGGAAGAATCCTTTGGGTCTTCCAATATCAAT…
Chorilaena anceps	OL591221	0.5926	0.5075	61	rpl23	ATGGATGGAATCAAATATGCAGTATTTACAGACAAAAGTATTCGGTTATTGGGGAAAAATCAATATACTTCTAATGTCGAATCAGGATCAACTAGGACAGAAATAAAGCATTGGGCCGAACTCTTCTTTGGTGTCAAGGTAATAGCTATGAATAGTCATCAACTCCCCCGAAAGGGTAGAAGAATGGGACCTATTATGGCACATACAATGCATTACAGACGTATGATCATTACACTTCAACCGGGTTATTCTATTCCACCTCTTAGAAAGAAAAGAACTTAA
Chorilaena anceps	OL591221	0.5	0.5081	55.4749	rpl2	ATGGCGGTACATTTATACAAAACTTCTACCCCGAGCACACGCAATGGAGCCGTAGACAGTCAAGTGAAATCCAATCCACGAAATAATTTGATCTATGGACAGCATCGTTGTGGTAAAGGTCGTAATGCCAGAGGAATCATTACCGCAGGGCATAGAGGGGGGGGTCATAAGCGTCTATACCGTAAAATCGATTTTCGACGGAAGGAAAAAGAAAAAGACATATATGGTAGAATCGTAACCATAGAATACGACCCTAATCGAAATGCATACATTTGTCTCATACACTATGGGGATGGTGAGAAGAGATATATTTTACATCCCAGAGGGGCTATAATTGGAGATACCATTGTTTCTGGTACAGAAGTTCCTATAAAAATGGGAAATGCCCTACCTTTGACC…
Citrus reticulata	MW147176	0.4	0.5246	54.8529	rps12	ACTATCACCCCCAAAAAACCAAACTCTGCCTTACGTAAAGTTGCCAGAGTACGATTAACCTCTGGGTTTGAAATCACTGCTTATATACCTGGTATTGGCCATAATTCACAAGAACATTCTGTAGTCTTAGTAAGAGGGGGGAGGGTTAAGGATTTACCCGGTGTGAGATATCACATTGTTCGAGGAACCCTAGATGCTGTCGGAGTAAAGGATCGTCAACAAGGGCGTTCTAAATATGGGGTCAAAAAGCCAAAATAA
Citrus reticulata	MW147176	0.3675	0.3122	34.1782	psbA	ATGACTGCAATTTTAGAGAGACGCGAAAGCGAACGCCTATGGGGTCGCTTCTGTAACTGGATAACTAGCACTGAAAACCGTCTTTACATTGGTTGGTTTGGTGTTTTGATGATCCCTACTTTATTGACCGCAACTTCTGTATTTATTATCGCCTTCATTGCTGCTCCTCCAGTAGATATTGACGGTATTCGTGAACCTGTTTCTGGATCTCTACTTTATGGAAACAATATTATTTCTGGTGCGATTATTCCTACTTCTGCAGCTATAGGTTTGCATTTTTACCCGATATGGGAAGCGGCATCCGTTGATGAATGGTTATACAATGGCGGTCCTTATGAGCTAATTGTTCTACACTTCTTACTTGGTGTAGCTTGTTACATGGGTCGTGAGTGGGAACTT…
Citrus reticulata	MW147176	0.5679	0.4023	49.7051	matK	ATGGAGGAATTTCAAGTATATTTAGAACTAGATAGATCTCAACAACACGACTTCCTATACCCACTTCTTTTTCGGGAGTATATTTATGTACTTGCTCATGATCATGGTTTAAATAGCTCGATGATGTCATTGGAAGGTGGGTTTTATGACAATAAATCTAGTTCACTAAGTGTGAAACGGTTAATTACTAGAATGTATCAACGGATTAATTTGAGTATTGTTGCTAATGATTCGAATCAAAATCCGATTTTTGGGCACAACAATAAGTTATATTCTCAAATTATATCAGAGGTATTTGCTGCTGTGGTGGAAATTCCATTTTCCCTACGGTTGGTGGCTTTTTTAGAAGGGAAAGAAATTGAAAAATCGCCTAATTTCCAATCAATTCATTCAATATTT…
Citrus reticulata	MW147176	0.55	0.4348	50.611	rps16	ATGGTAAAACTTCGTTTGAAACGATGTGGTAGAAAGCAACGAGTCGTTTATCGAATCGTTGCAATTGATGGTCGATCCCGAAGAGAAGGAAGAGATCTTCGGAAAGTGGGTTTTTATGATCCGATAAATAATCAAACCCATTTAAATGTTCCTGCTATTCTATATTTCCTTGCCAAGGGCGCTCAACCTACAGGAACCGTTCATGATATTTCACAGAAAGCGGGGGTTTTTACAGAAGTTAGTCTTAATCAAACGAAATTCTATTAA
Citrus reticulata	MW147176	0.4375	0.3261	32.9203	psbK	ATGCTTAATATCTTTAGTTTAATGTATATCTGTCTTAATTCTGCCCTTTATTCGAGTAGTTTTTTATTCGCTAAATTACCCGAGGCCTACGCTTTTTTGAATCCAATTGTAGATGTTATGCCAGTAATACCTGTTCTATTTTTTCTCTTAGCCTTTGTTTGGCAAGCTGCTGTAAGTTTTCGATAA
Citrus reticulata	MW147176	0.2941	0.45	61	psbI	ATGCTTACTCTCAAACTCTTTGTTTACACCGTAGTGATATTCTTTGTTTCGCTCTTCATCTTCGGATTCCTGTCTAATGATCCAGGGCGTAATCCCGGACGCGAAGAATAA
Citrus reticulata	MW147176	0.5133	0.5028	50.6553	atpA	ATGGCAACAATTAAAGCCGACGAAATTAGTAATATTATCCGCGAACGTATTGAGCAATATAATAGAGAAGTAAAGATTGTAAATATTGGGACCGTACTTCAAGTAGGCGACGGCATCGCCCGTATTTATGGTCTTGATGAAGTAATGGCAGGTGAATTAGTAGAATTTGAAGAGGGTACAATAGGCATTGCTCTGAATTTGGAATCAACTAATGTTGGTGTTGTTTTAATGGGTGACGGTTTAATGATACAAGAAGGAAGTTCTGTAAAAGCAACCGGAAAAATTGCTCAGATACCAGTAAGCGAGGCTTATTTAGGTCGTGTTATAAATGCCCTGGCTAAACCTATTGATGGTCGAGGTGAAATTTCAGCTTCTGAATCTCGATTAATTGAATCCCCT…
Citrus reticulata	MW147176	0.6102	0.5238	53.9131	atpF	ATGAAAAATGTAACCGATTCTTTCGTTTCTTTGGTTAACTGGCCATTCGCCGGGAGTTTCGGGCTTAATACCGATATTTTAGCAACAAATCCAATAAATCTAAGTGTAGTGCTTGGTGTATTGATCTTTTTTGGAAAGGGAGTGTTAAGTGATTTATTAGATAATCGCAAACTGAGGATTTTGAATAGTATTCGAAATTCAGAAGAACTGCAGAGAGGGGCCATTGAACGGCTGGAAAAAGCCCGGGCCCGGTTACGAAAAATAGAAATAGAAGCAGATCAGTTTCGAGTGAATGGATACTCTGAGATAGAACGAGAAAAATTCAATTTGATTAATTCAACTTATAAGACTTTGGATCAATTAGAAAATTACAAAAATGAAACCATTCATTTTGAACAA…
Citrus reticulata	MW147176	0.7917	0.3793	59.3551	atpH	ATGAATCCACTGATTTCTGCCGCTTCCGTTATTGCTGCTGGGTTGGCTGTTGGGCTTGCTTCTATTGGACCTGGAGTTGGTCAAGGTACTGCTGCGGGCCAGGCAGTAGAAGGGATCGCGAGACAGCCCGAGGCGGAGGGAAAAATACGAGGTACTTTATTGCTTAGTCTGGCTTTTATGGAAGCTTTAACAATTTATGGGCTGGTTGTAGCATTAGCACTTTTATTTGCGAATCCTTTTGTTTAA
Citrus reticulata	MW147176	0.4384	0.4286	48.1338	atpI	ATGAATGTTCTATCATGTTCCATGAATACACTAAGGGGGTTATACGATATATCCGGTGTGGAAGTAGGCCAACATTTCTATTGGCAAATAGGTGGGTTCCAGGTCCATGCCCAAGTACTTATTACTTCTTGGGTTGTAATTGCTATCTTATTAGGTTCAGCCTTTATAGCCGTTCGGAATCCACAAACCGTTCCGACTGCCACTCAAAATTTCTTCGAATATGTCCTTGAATTCATTCGAGACGTGAGCAAAACTCAGATTGGAGAAGAATATGGCCCATGGGTTCCCTTTATTGGAACTCTGTTTCTTTTTATTTTTGTTTCTAATTGGTCAGGTGCTCTTTTACCTTGGAAAATCATAGAGTTACCTCATGGGGAGTTAGCCGCACCCACGAATGAT…
Citrus reticulata	MW147176	0.5541	0.4663	56.981	rps2	ATGGCAAGAAGGTATTGGAACATCCATTTGGAAGAGATGATGGAAGCAGGAATTCATTTTGGTCATGGTACTCGGAAATGGAATCCTAGAATGGCACCTTATATATCTGCAAAACATAAAGGTATTCATATTACAAATCTGACTCGAACTGCTCGGTTTTTATCAGAAGCTTGTGATTTAGTTTTTGATGCAGCAAGTAGGGGAAAACAATTCTTAATTGTTGGTACTAAAAATAAAGCAGCTGATTTAGTCGCGCGAGCTGCAATAAGGGCTCGGTGCCATTATGTTAATCAAAAATGGCTCGGCGGTATGTTAACCAATTGGTCCACTACAGAAACGCGACTTCACAAGTTCAGGGATTTGAGAACGGAACAAAAAGGGGGGAGACTCGACAGTCTT…
Citrus reticulata	MW147176	0.574	0.469	52.5358	rpoC2	ATGGCAGAACGGGTGAGTCTGGTCTTTCACAATAAAATGATAGATGGAACTGCCATTAAACGACTTATTAGCAGGTTAATAGATCACTTCGGAATGGCATATACATCCCACATCCTGGATCAAGTAAAGACCCTGGGGTTCCAGCAAGCCACTGCTACATCTATTTCATTAGGCATTGATGATCTTTTAACGATACCTTCTAAGCGATGGCTAGTCCAAGATGCTGAACAACAAAGTTTTATTTTGGAAAAACACTATCATTATGGGAATGTACACGCGATAGAAAAACTACGACAATCCATTGAGATATGGTATGCTACAAGTGAATATTTGCGACAAGAAATGAATCCTAATTTTAGGATGACTGAGCCTTTTAATCCAGTCCATATAATGTCTTTT…
Citrus reticulata	MW147176	0.5779	0.4668	50.6777	rpoC1	ATGATTGATCGATATAAACATCAACAACTCCGAATTGGATCAGTTTCTCCTCAACAAATACGCGCTTGGGCCAATAAAATCCTACCTAATGGAGAGATAATTGGAGAAGTGACAAAACCCTATACTTTTCATTACAAAACCAATAAACCGGAAAAAGATGGATTATTTTGTGAAAGAATTTTTGGGCCTATTAAAAGTGGAATTTGTGCTTGTGGAAATTATCGAATAATCGGAGATGAAAAAGAAGACCCGCAATTTTGTGAACAATGTGGGGTTGAATTTGTTGATTCTCGGATACGAAGATATCAAATGGGATACATAAAACTGGGATGCCCAGTAACCCACGTGTGGTATTTGAAACGTCTTCCTAGTTATATCGCGAATCTTTTAGATAAACCT…
Citrus reticulata	MW147176	0.625	0.4926	50.776	rpoB	ATGCTCGGAGATGGAAATGCAGGAATGTCTACAATACCTGGGTTGAATCAGATACAATTTGAAGGATTTTGTAGGTTCATTGATCAGGGCTTAACAGAAGAGCTTTATAAGTTTCCAAAAATTGAAGATACAGATCAAGAAATTGAATTTCAATTATTTGTGGAAACATATCAATTGGTAGAACCCTTGCTAAAAGAAAGAGATGCTGTATATGAATCATTCACGTATTCTTCTGAATTATATGTATCCGCAGGATTAATTTGGAAAAGCCGAGGGGACATGCAGGAACAAACTATTTTTATTGGAAACATTCCTCTAATGAATTCTTTGGGAACTTCTATAGTAAACGGAATATACAGAATTGTCATCAATCAAATATTGCAAAGTCCCGGTATCTAT…
Citrus reticulata	MW147176	0.5455	0.5263	29.2857	petN	ATGGATATAGTAAGTCTCGCTTGGGCTGCTTTAATGGTAGTCTTTACATTTTCCCTTTCGCTCGTAGTATGGGGAAGAAGTGGACTCTAG
Citrus reticulata	MW147176	0.5556	0.4231	45.1818	psbM	ATGGAAGTAAATATTCTCGCATTTATTGCTACTACACTGTTCGTTCTAGTTCCTACTGCGTTTTTGCTTATAATATACGTAAAAACGGTCAGTCAAAGTGATTAA
Citrus reticulata	MW147176	0.4435	0.3739	52.1252	psbD	ATGACTATAGCCCTTGGTAAATTTACCAAAGAGGAAAAGGATTTATTTGATATTATGGATGACTGGTTACGGAGGGACCGATTCGTTTTTGTAGGTTGGTCTGGCCTATTGCTCTTTCCTTGTGCCTATTTCGCTTTAGGGGGTTGGTTCACAGGTACAACCTTTGTAACTTCATGGTATACCCATGGATTAGCCAGTTCCTATTTGGAAGGCTGCAACTTCTTAACCGCCGCAGTTTCGACTCCTGCTAATAGTTTAGCGCATTCTTTGTTGTTACTATGGGGTCCTGAAGCACAAGGAGATTTTACTCGCTGGTGTCAATTAGGCGGTCTTTGGACTTTTGTTGCTCTCCACGGTGCTTTCGGACTAATAGGTTTCATGTTACGTCAATTTGAACTT…
Citrus reticulata	MW147176	0.4903	0.395	50.4311	psbC	ATGAAAACCTTATATTCCCTGAGGAGGTTCTACCCCGTGGAAACGCTCTTTAATGGAACTTTAGCTGTAGCAGGTCGTGACCAAGAAACCACCGGTTTCGCTTGGTGGGCCGGGAATGCCCGACTTATCAATTTATCCGGTAAACTGCTGGGCGCTCATGTAGCCCATGCTGGATTAATCGTATTCTGGGCCGGAGCAATGAACCTCTTTGAAGTGGCTCATTTCGTACCAGAAAAGCCCATGTATGAACAAGGATTAATTTTACTTCCCCACCTAGCTACTCTAGGCTGGGGGGTAGGTCCTGGTGGGGAAGTTATAGACACCTTTCCATACTTTGTATCTGGAGTACTTCACTTAATTTCCTCTGCAGTATTGGGCTTTGGCGGTATTTATCATGCA…
Citrus reticulata	MW147176	0.5263	0.3409	52.7462	psbZ	ATGACTATTGCTTTCCAATTGGCTGTTTTTGCATTAATTGCTACTTCATCAATCTTACTGATTAGTGTACCCGTTGTATTTGCTTCTCCGGATGGTTGGTCGAGTAACAAAAATGTCGTATTTTCTGGTACATCATTGTGGATTGGATTAGTCTTTCTGGTGGGTATCCTTAACTCTCTCATTTCTTAA
Citrus reticulata	MW147176	0.6857	0.5606	46.6303	rps14	ATGGCAAGGCAAAGTTTGATTCAGAGGGAAAAGAAAAGGCACAAATTGGAACAAAAATATCATTTGATTCGTCGATCCTCAAAAAAAGAAATAAACAAAGCTCCATCGTTGAGCGATAAATGGAAAATTCATGGAAAGTTACAATCCTCACCGCGTAATAGTGCACCTACCCGTCTTCATCGACGTTGTTTTTTGACCGGAAGGCCGAGAGCTAACTATCGAGACTTTGGACTATCCGGACACATACTTCGTGAAATGGTTCATGCGTGTTTGTTGCCGGGGGCAACAAGATCAAGTTGGTAA
Citrus reticulata	MW147176	0.563	0.368	52.9458	psaB	ATGGCATTAAGATTTCCAAGGTTTAGCCAAGGCTTAGCTCAGGACCCCACTACTCGTCGTATTTGGTTTGGTATTGCTACCGCACATGACTTCGAGAGTCATGATGATATTACTGAGGAACGTCTTTATCAGAATATTTTTGCTTCTCACTTCGGGCAATTAGCAATAATTTTTCTGTGGACTTCCGGAAATCTCTTTCATGTAGCTTGGCAAGGAAATTTTGAGGCATGGGTCCAGGACCCTTTACATGTAAGACCTATTGCTCATGCAATTTGGGATCCTCATTTTGGTCAACCGGCCGTGGAAGCTTTTTCTCGGGGAGGTGCTCTTGGCCCGGTGAATATCGCTTATTCTGGTGTTTATCAGTGGTGGTATACAATCGGTTTACGCACTAATGAG…
Citrus reticulata	MW147176	0.5057	0.4262	51.8276	psaA	ATGATTATTCGTTCGCCGGAACCAGAAGTAAAAATTTTGGTAGATAGGGATCCCGTAAAAACTTCTTTCGAGGAATGGGCCAAACCGGGGCATTTCTCAAGAACCATAGCTAAGGGACCTGAGACTACCACTTGGATCTGGAACCTACATGCTGATGCTCACGACTTCGATAGCCATACCAGTGATTTGGAGGAGATCTCTCGAAAAGTATTTAGTGCCCATTTCGGACAACTCTCCATCATTTTTCTTTGGCTGAGCGGAATGTATTTCCACGGTGCTCGTTTTTCCAATTATGAAGCCTGGCTAAGCGATCCTACTCACATTGGACCTAGCGCACAGGTGGTTTGGCCAATAGTGGGCCAAGAAATCTTGAACGGTGATGTGGGCGGGGGTTTCCGA…
Citrus reticulata	MW147176	0.5849	0.4569	46.9012	ycf3	ATGCCTAGATCGCGGATAAACGGAAATTTTATTGATAAGACCTTTTCGATTGTAGCCAATATATTATTACGAATAATTCCGACAACTGTAGGAGAAAAAGAGGCATTTACCTATTACAGAGATGGTATGTCAGCTCAATCTGAAGGCAATTATGCGGAAGCTTTACAGAATTATTATGAAGCTATGCGACTAGAAATTGATCCTTACGATCGAAGCTATATACTCTATAACATAGGCCTTATCCACACAAGTAACGGAGAACATACAAAAGCTTTAGAATATTATTTTCGGGCACTAGAACGAAATCCGTTCTTACCACAAGCTTTTAATAATATGGCTGTGATCTGTCATTACCGGGGGGAACAGGCCGTTCGACAGGGAGATTCTGAAATTGCGGAG…
Citrus reticulata	MW147176	0.4906	0.4966	61	rps4	ATGTCACGTTACCGAGGGCCTCGTTTCAAAAAAATACGCCGTCTGGGGGCTTTGCCGGGACTAACGAGTAAAAGGCCTAGAGCCGGAAGCGATTTTAGAAACCAATCGCGCTCCGTAAAAAAATCTCAATATCGAATTCGTTTAGAAGAAAAACAAAAATTGCGTTTTCATTATGGTCTTACAGAACGACAATTACTTAAATATGTTCGTATCGCCAGAAAAGCCAAAGGGTCAACCGGTCTGGTTTTACTACAATTACTTGAAATGCGTTTGGATAACATTCTTTTTCGATTGGGTATGGCTTCAACTATTCCTCAAGCCCGCCAATTGGTTAACCATCGACATATTTTAGTTAATGGTCGTATAGTCGATATACCAAGTTATCGTTGCAAACCCCGA…
Citrus reticulata	MW147176	0.6111	0.4286	49.3697	ndhJ	ATGCAGGGTCGTTTGTCTGCTTGGCTGGTCAAGCATGGGCTAGTTCATAGATCTTTGGGCTTTGATTACCAAGGAATAGAAACTTTACAAATAAAGCCCGAGGATTGGCACTCCGTTGCTGTCATTTTGTATATATATGGCTACAATTATCTACGGTCCCAATGTGCCTATGATGTAGCACCGGGCGGACTGTTAGCCAGTGTGTATCATCTTACGCGAATAGAGTATGGTGTAGATCAACCAGAAGAGGTATGCATAAAAGTATTTGCTCCAAGGAGTAATCCCAAAATTCCATCGGTTTTCTGGGTTTGGAAAAGTGCGAATTTTCCAGAACGGGAATCTTATGATATGCTGGGAATCCTTTATGATAATCATCCACGACTGAAACGTATCTTAATG…
Citrus reticulata	MW147176	0.5224	0.4472	55.1342	ndhK	ATGAATTCTATTGAATTTTCCTTACTTGATCGAACAACCCCAAATTCATTTATTTCAACTACATCAAACGATCTTTCAAATTGGTCAAGACTCTCCAGCTTATGGCCGCTTCTTTATGGTACCAGTTGTTGTTTCATTGAATTTGCTTCATTAATCGGCTCGCGGTTCGATTTTGACCGTTATGGGCTGGTACCAAGATCGAGCCCTAGACAGGCGGACCTAATTTTAACAGCTGGTACAGTAACAATGAAAATGGCTCCTTCTTTAGTGAGATTATATGAACAAATGCCTGAACCAAAATATGTTATTGCTATGGGAGCATGTACAATTACAGGGGGGATGTTCAGTACCGATTCGTATAGTACTGTTCGAGGAGTTGATAAGCTAATTCCCGTGGAT…
Citrus reticulata	MW147176	0.6111	0.4118	61	ndhC	ATGTTTCTGCTTTACAAATATGATATTTTCTGGGCATTTCTAATAATATCAAGCGTTATTCCTATTTTGGCATTTCTAATTTCCGCAGTTTTAGCCCCGATTAACAAAGGGCCAGAGAAACTTTCTAGTTATGAATCGGGTATCGAACCAATGGGCGATGCTTGGTTACAATTTCGAATCCGGTATTATATGTTTGCTCTAGTTTTTGTTGTTTTTGATGTTGAAACCGTTTTTCTTTATCCATGGGCAATGAGTTTTGATGTATTGGGGGTACCCGTATTTATAGAAGCTTTCATTTTCATGCTTATCCTAATTGTTGGTTTAGTTTATGCGTGGCGAAAAGGAGCATTAGAGTGGTCTTAG
Citrus reticulata	MW147176	0.561	0.4839	58.3241	atpE	ATGACCTTAAATCTTTGTGTACTGACCCCTAATCGAATTGTTTGGGATTCAGAAGTGAAAGAAATCATTTTATCTACTAATAGTGGACAAATCGGCGTATTACCAAATCACGCGCCTATTGCCACAGCTGTAGATATAGGTATTTTAAGAATCCGCTTTAACGACCAATGGTTAACGATGGCTCTGATGGGTGGTTTTGCTAGAATAGGGAATAATGAGATCACTATTTTAGTAAATGATGCGGAGAAGAGTAGTGACATTGATCCCCAAGAAGCCCAGCAAACTCTTGAAATAGCAGAAGCTAATTTGAGGAAAGCTGAAAGCAAGAGACAAACAATTGAGGCAAATCTAGCTCTCAGACGAGCTAGGACACGAGTAGAGGTTATCAATGCGATTTCA…
Citrus reticulata	MW147176	0.5092	0.4673	51.3522	atpB	ATGAGAATAAATCCTACTACTTCCGGTCCTGGGGTTTCCGCGTTTGCAAACAAAAACCTAGGACATATCGCTCAAATCATTGGTCCGGTACTGGATGTAGCCTTTCCCCCCGGCAAGATGCCTAATATTTACAATGCTCTGGTAGTTAAGGGTCGAGATACTGTCGATCAACCAATTAATGTGACTTGCGAGGTACAGCAATTATTAGGGAATAATCGAGTTAGAGCTGTAGCCATGAGTGCTACAGATGGTCTAACGAGGGGTATGGAAGTAATTGACACGGGAGCTCCTCTAAGTGTTCCAGTCGGCGGAGTGACTCTAGGACGAATTTTCAACGTGCTTGGAGAGCCCGTTGATAATTTAGGTCCTGTAGATACTCGCACAACATCCCCTATTCAT…
Citrus reticulata	MW147176	0.5032	0.4044	51.0681	rbcL	ATGTCACCACAAACAGAGACTAAAGCGAGTGTTGGATTCAAGGCCGGTGTTAAAGATTATAAATTGACTTATTATACTCCTGACTATGTAACCAAAGATACTGATATCTTGGCAGCATTCCGAGTAACTCCTCAGCCCGGAGTTCCACCCGAGGAAGCGGGGGCTGCGGTAGCTGCGGAATCTTCTACTGGTACCTGGACAGCTGTGTGGACCGATGGGCTTACCAGCCTTGATCGTTACAAAGGGCGATGCTACAACATTGAGCCCGTTGCTGGAGAAGAGAATCAATATATATGTTATGTAGCTTACCCGTTAGACCTTTTTGAAGAAGGTTCTGTTACTAACATGTTTACTTCCATTGTGGGTAATGTATTTGGTTTCAAAGCACTGCGCGCTCTA…
Citrus reticulata	MW147176	0.5172	0.3592	48.8026	accD	ATGAAAAAATGGTGGTTCAATTCGATGTTATCTAAGGGTAAGGGGGAATTAGAATACAGGTGTTGGTTAAGTAAATCAATGGAGAGCCCTGGTCCTATTAAAAATCCCAGTGTAAGCGAGGAACTGATTCGAAATGATAAGAATAAAAACATTCATAATTCGAGCGATAGTGACAGTTCAAGTTACAGCAAATTAGCTGGTGTCAGGGACATTCATAATTTCCTCTCGGATGACACTTTTTTTGTTAAGGATAGTAATAGAGACAGTTATTCCATCTATTTTGATATTGAAAATCAAATTTTGGAACTAGACAATGCTCATTCTTTTCTGAGTGAACTAGAAAGTTCTTTTTATAGCTTTCGTAATTATAGTTCTAGGAATAATGGATCTAAAAGCGCT…
Citrus reticulata	MW147176	0.6429	0.4167	61	psaI	ATGACAATTCTCAACAGCTTTCCCTCTATTTTTGTGCCTTTAGTGGGCCTAGTATTTCCGGCAATGGCAATGGCTTCGTTATTTCTTTATCTTGAAAAAAATAAGATTTTGTAA
Citrus reticulata	MW147176	0.5522	0.4322	61	ycf4	ATGAGTTGGCGATCAGAATATATATGGGTAGAATTTATAGCGGGCTCTCGCAAACCAGGCAATTTCTTCTGGGCCTTTATCCTTTTTTTAGGCTCATTAGGATTCTTAGTGGTTGGAATTTCTAGTTATCTTGATAGGAATTTGCTATCTTTATTGCCGTCGCAGCAAATAAATTTTTTTCCACAAGGGATCGTGATGTCTTTCTACGGGATCGCGGGTCTCTTTATTAGTTCCTATTTGTGGTGCACAATTATATGGAATGTAGGTAGCGGTTATGATCGATTTGATACAAAAGAGGGAATAGTGTGTATTTTTCGTTGGGGATTTCCTGGAAAAAATCGCCGCATCTTTCTACGATTCCTTATGAAAGATATTCAGTCCATCAGAATAGAAGTTAAA…
Citrus reticulata	MW147176	0.4795	0.4074	59.4972	cemA	ATGACAAAAAAGAACGCATCCATTCCCCTTAGATATCTTTCATCTATAGTATTTGTAGTATTTTTGCCCTGGTGGATCCCTCTCTCATTTAATAAAAGTCTGGAATCTTGGGTTACTAATTGGTGGAATACTAGTCAATCCGAAACCTTTTTGAATGATATTCAAGAAAAGGCTATTCTAGAAAAATTCATAGAATTAGAGGAATTATTTCTCTTGGACGAAATGATAAAGGAATTTCCGGAAAGACGTCTAGAAAAGCTTCGTATAGGGCTCCAGAAAGAAACAATCCAATTAATCAAGATGCACGATGAGGATCATATCCATACGATTTTTCACTTCTCGACAAATACAATCTGCTTCGTTATTCTAAGTGGTTATTCTATTTTGTGTAATGAAGAA…
Citrus reticulata	MW147176	0.5566	0.4605	54.0549	petA	ATGCAAATTAGAAATACCTTTTCTTCGTTAAAGGGAGAGATTACTCGATTCATTTCCGTATCCCTCATGATATATATAATAACTCGGGCATCAATTTCAAATGCATATCCCATTTTTGCGCAGCAGGGTTTTGAAAATCCACGAGAAGCAACTGGTCGTATTGTATGCGCCAATTGCCATTTAGCTAATAAGCCCGTGGATATTGAGGTTCCACAGGCGGTACTCCCCGATACTGTATTTGAAGCAGTTGTTAGAATTCCTTATGATATGCAACTAAAACAAGTTCTTGCTAATGGTAAAAAGGGGGCTTTGAATGTGGGGGCCGTTCTTATTTTACCAGAGGGGTTTGAATTAGCCCCCCCCGATCGTATTTCGCCCGAGATGAAAGAAAAGATAGGC…
Citrus reticulata	MW147176	0.5	0.3704	23.2532	psbJ	ATGGCCGATACTACTGGAAGGATTCCCCTTTGGATAATAGGAACTGTAACTGGTATTCCTGTGATCGGTTTAATAGGCATTTTCTTTTATGGTTCATATTCCGGATTAGGTTCGTCCTTGTAG
Citrus reticulata	MW147176	0.3125	0.4783	61	psbL	ATGACACAATCAAACCCAAACGAACAAAATGTTGAATTGAACCGTACCAGTCTCTACTGGGGGTTATTGCTCATTTTTGTACTTGCTGTTTTATTTTCCAATTACTTCTTCAATTAA
Citrus reticulata	MW147176	0.5333	0.56	53.3846	psbF	ATGACCATAGATCGAACCTATCCAATTTTTACAGTGCGATGGTTGGCTGTTCACGGACTAGCTGTACCTACCGTTTCTTTTTTGGGGTCAATATCAGCAATGCAGTTCATCCAACGCTAA
Citrus reticulata	MW147176	0.4333	0.3889	60.1481	psbE	ATGTCTGGAAGCACAGGAGAACGTTCTTTTGCTGATATTATTACCAGTATTCGATACTGGGTCATTCATAGCATTACTATACCTTCCCTATTCATTGCGGGTTGGTTATTCGTCAGCACGGGGTTAGCTTATGATGTGTTTGGAAGCCCCCGGCCAAACGAGTATTTTACAGAGAGCCGGCAAGGAATTCCATTAATAACCGGCCGTTTTGATTCTTTGGAACAACTCAATGAATTTAGTAGATCTTTTTAG
Citrus reticulata	MW147176	0.8333	0.3462	54.6842	petL	ATGCCTACTATAACTAGTTATTTTGGTTTTCTACTAGCGGCTTTAACTATAACCTCGGCTCTATTTATTGGTCTGAGTAAGATAGGACTTATTTGA
Citrus reticulata	MW147176	0.3333	0.4615	61	petG	ATGATTGAAGTCTTTCTATTTGGAATCGTCTTAGGTCTAATTCCTATTACTTTGGCTGGATTATTCGTAACCGCCTATTTACAATACAGACGTGGTGATCAGTTGGACCTTTGA
Citrus reticulata	MW147176	0.5294	0.6071	61	psaJ	ATGCGAGATCTAAAAACATATCTTTCCGTGGCACCGGTACTAAGTACTCTATGGTTCGGGTCTTTAGCAGGGTTATTGATAGAAATCAACCGTTTATTCCCCGACGCATTGACATTTCCTTTTTTTTCATTCTAG
Citrus reticulata	MW147176	0.6087	0.4318	35.1441	rpl33	ATGGCCAAGGGTAAAGAGGTCCGAGTAAGGGTTATTTTGGAATGTACTAGTTGTGTTCGAAACGGTGTTAATAAGGAATCAAGGGGTATTTCCAGATATATTACTCAAAAGAATCGACACAATACACCCAGTCGATTGGAATTGAGAAAATTCTGTCCCTATTGTTACAAGCATACACTTCATGGGGAGATAAAAAAATAG
Citrus reticulata	MW147176	0.6296	0.4933	47.8279	rps18	ATGGATAAAACCAAGCGACTCTTTCTTAAATCCAAGCGATCTTTTCGTAGGCGTTTGCCCCCGATCCAATCGGGGGATCGAATTGATTATAGAAACATGACTTTAATTAGTCGATTTCTTAGTGAACAAGGAAAAATATTATCTAGACGGGTGAATAGATTGACCTTAAAAGAACAACGATTAATTACTATTGCTATAAAACAAGCTCGTATTTTATCTTCGTTACCTTTTCTTAATAATGAGAAACAATTTGAAAGAAGTGGGTTGACCGCTAGACCTCCCGGTCTTAGAACCAGAAAAAAATAG
Citrus reticulata	MW147176	0.6452	0.4828	61	rpl20	ATGACCAGAATTAGACGAGGATATATAGCTCGGAGACGTAGAACAAAAATGCGTTTATTTGTATCAAGCTTTCGCGGGGCTCATTCACGACTTAGCCGAACAATTACTCAACAGAAAATAAGAGCTTTGGTTTCGGCTCATCGCGATAGAGATAGGAAAAAAAGAGATTTTCGTCGTTTGTGGATCACCCGAATAAATGCAGTAATTCGCGGAAATCAGGTATCCTATAGTTATAGTAGATTAATATACAATCTGTATAAGGCGCAGTTGGTTCTTAATCGTAAGATACTTGCACAAATAGCTATATCAAATAGGACTTGTCTTTATATGATTTCCAATGAGATTATAAAATAA
Citrus reticulata	MW147176	0.5	0.5088	61	rps12	TAGAACGCCCTTGTTGACGATCCTTTACTCCGACAGCATCTAGGGTTCCTCGAACAATGTGATATCTCACACCGGGTAAATCCTTAACCCTCCCCCCTCTTACTAAGACTACAGAATGTTCTTGTGAATTATGGCCAATACCAGGTATATAAGCAGTGATTTCAAACCCAGAGGTTAATCGTACTCTGGCAACTTTACGTAAGGCAGAGTTTGGTTTTTTGGGGGTGATAGTATGCCAACTATTAAACAACTTATTAGAAACCCAAGACAGCCAATCAGAAATGTTACCAAATCCCCCGCTCTGCGGGGATGTCCTCAGCGCCGAGGAACATGTACAAGGGTGTAT
Citrus reticulata	MW147176	0.5067	0.4836	61	clpP	ATGCCTATTGGTGTTCCAAAAGTACCTTATCGAAGTCCCGGGGACAAGCATCCATCTTGGGTTGACATATACAACCGACTTTATCGAGAAAGATTACTTTTTTTAGGTCAAATGGTTGAGAGCGATATCTCGAATCAACTTATTGGTATTATGGTATATCTCAGTATAGAGAACGAGACCAAGGATTTGTATTTATTTATCAACTCTCCTGGCGGATGGGTAATACCCGGGATAGCAATTTATGATACTATGCAATTTGTGCGACCCGATGTACAGACAATATGCATGGGATTGGCCGCCTCCATGGGGTCTTTTCTCCTGGCCGCCGGAGCAAGTACCAAACGTCTAGCATTCCCTCACGCTAGGGTCATGATCCATCAACCTATTGGCGCTTTTTAT…
Citrus reticulata	MW147176	0.522	0.4257	50.7496	psbB	ATGGGTTTGCCTTGGTATCGTGTTCATACCGTCGTATTGAATGATCCCGGTCGTTTGATTGCTGTCCATATAATGCATACAGCCCTGGTTGCGGGTTGGGCCGGTTCAATGGCTCTATATGAATTAGCTGTTTTTGATCCCTCCGATCCAGTTCTTGATCCAATGTGGAGACAAGGCATGTTCGTTATACCCTTCATGACTCGTTTAGGAATAACCGATTCATGGGGTGGTTGGAGTATTACAGGGGGGACAGTAACGAATCCGGGTATTTGGAGTTACGAAGGTGTAGCGGGGGCACATATTGTGTTTTCCGGATTGTGCTTCTTGGCAGCTATCTGGCATTGGGTGTATTGGGATCTAGCAATATTTGTTGATGACCGTACAGGAAAACGTTCTTTG…
Citrus reticulata	MW147176	0.4545	0.56	43.1429	psbT	ATGGAAGCATTGGTTTATACATTCCTCTTAGTCTCGACTCTAGGGATCATTTTTTTCGCTATCTTTTTTCGAGAACCGCCTAAAGTTCCAACTAAAAAAACAAAATGA
Citrus reticulata	MW147176	0.4118	0.5556	61	pbf1	ATGGAAACAGCAACCCTAGTCGCCATCTCTATATCTGGGTTACTTGTAAGTTTTACTGGGTACGCCTTATATACTGCTTTTGGGCAACCCTCTCAACAACTAAGAGATCCATTCGAGGAACACGGGGACTAG
Citrus reticulata	MW147176	0.75	0.44	61	psbH	ATGGCTACACAAACAGTTGAGGGTAGTTCTAGAGCTCGTCCAAAAAGAACTTCTGCAGGGGGCTTGTTGAAACCCTTGAATTCGGAATATGGTAAAGTAGCTCCTGGATGGGGAACTACTCCTTTGATGGGAGTCGCAATGGCTTTATTTGCGGTATTCCTATCTATTATTTTGGAGATTTATAATTCGTCCGTTTTACTGGACGGAATTTCACTGAATTAG
Citrus reticulata	MW147176	0.5412	0.4333	59.8433	petB	ATGAGTATAAAATTCTCATATACGGTTCTCAGAGGGGAGTTCTCTTGGTTTACCTATCTCAATAAAGTCTACGATTGGTTCGAAGAACGTCTCGAGATTCAGGCGATTGCAGATGATATAACTAGTAAATACGTTCCTCCTCATGTCAACATATTTTATTGTCTGGGAGGAATTACGCTCACTTGTTTTTTAGTACAAGTAGCTACAGGGTTTGCTATGACTTTTTACTACCGCCCGACCGTTACTGAGGCTTTTGCCTCTGTTCAATACATAATGACGGAAGTTAACTTCGGGTGGTTAATTCGATCGGTTCATCGATGGTCGGCAAGTATGATGGTCCTAATGACAATCCTGCACGTATTTCGCGTGTATCTCACCGGGGGTTTTAAAAAACCCCGC…
Citrus reticulata	MW147176	0.5333	0.4914	44.5513	petD	ATGGGAGTAACAAAAAAACCTGACTTGAATGATCCTGTATTAAGGGCTAAGTTGGCTAAGGGTATGGGTCATAATTATTATGGAGAACCCGCATGGCCCAACGATCTTTTATATATTTTTCCAGTAGTAATTCTAGGTACTATTGCATGTACCGTAGGCTTAGCGGTTCTAGAACCATCAATGATTGGTGAACCCGCGGATCCATTTGCAACTCCTTTGGAAATCTTACCCGAATGGTATTTCTTTCCCGTATTTCAAATACTTCGTACAGTACCCAATAAGCTGTTGGGTGTTCTTTTAATGGTTTCAGTACCTACGGGATTATTAACAGTACCTTTTTTGGAAAATGTTAATAAATTCCAAAATCCATTTCGCCGTCCCGTAGCGACAACCGTCTTT…
Citrus reticulata	MW147176	0.5619	0.4821	55.1505	rpoA	ATGGTTCGAGAGAAAGTAAAAGTATCTACTCGGACACTGCAGTGGAAGTGTGTTGAATCAAGAGCAGACAGTAAGCGTCTTTATTATGGGCGCTTTATTTTGTCTCCACTTATGAAAGGTCAAGCCGACACAATAGGCATTGCGATGCGAAGAGTTTTGCTTGGAGAAATAGAAGGAACATGTATTACACGCGCAAAATCTGAGAAAATCCCACACGAATATTCTACCATAGTGGGTATTCAAGAATCGGTACATGAAATTTTAATGAATTTGAAAGATATTGTATTGAGAAGTAATCTTTATGGAACTTGTGACGCGCTTATTTGTGTCAAAGGCCCGGGATATGTAACTGCTCAAGACATCCTCTTGCCGCCTTCTGTGGAAATCGTTGATAATACG…
Citrus reticulata	MW147176	0.5238	0.4948	61	rps11	ATGGCAAAATCTCCACCACGAAGTGGTTCACGTAGGCCGGGACGGATCGGTTCACGTAAAAGTGGACGTCGAATACCAAAGGGCGTTATTCATGTTCAAGCAAGTTTCAACAACACCATTGTGACTGTTACAGATGTCCGGGGTCGGGTAATTTCTTGGTCCTCGGCCGGTACTTGTGGATTCAGGGGTACAAGAAGAGGTACGCCTTTTGCTGCTCAAACCGCAGCAGGAAATGCTATTCGAGCAGTAGCGGATCAAGGTATGCAACGAGCAGAAGTCATGATAAAGGGTCCTGGTCTCGGAAGAGATGCGGCATTACGAGCTATTCGTAGAAGCGGTATCCTTTTAAATTTCGTACGGGATGTAACCCCTATGCCACACAATGGTTGCAGACCCCCT…
Citrus reticulata	MW147176	0.6364	0.6296	46.75	rpl36	ATGAAAATAAGGGCTTCAGTTCGTAAAATTTGTGAAAAATGTCGACTGATCCGCAGGAGGGGACGGATTATAGTAATTTGTTCCAACCCGAGACATAAACAAAGACAAGGATAA
Citrus reticulata	MW147176	0.5217	0.5169	60.5347	rps8	ATGGGCAAGGACACTATTGCTGACATAATAACTTCTATACGAAATGCTGACATGAATAGAAAGGGAACGGTTCGAATAGCATCTACTAACATCACCGAAAACGTTGTTAAAATCCTTTTGCGAGAGGGTTTTATCGAAAACGCAAGGAAACTCGTGGAAAACAAAAAAGAGTTTTTGGTTTTAACCCTACGACATCGAAGGAATAGGAAAGGGCCGTATAGACCCATTTTAAATTTAAAACGAATCAGTCGACCCGGTCTACGAATCTATTTTAACTATCGACGAATTCCTAGAATTTTAGATGGGATGGGGATTGTAATTCTCTCTACTTCTCGGGGTATAATGACAGACCGAGCGGCTCGACTGGAAAGAATCGGTGGAGAAATTTTGTGTTATATA…
Citrus reticulata	MW147176	0.4706	0.4831	53.9309	rpl14	ATGATTCAACCTCAAACCCATTTGAATGTAGCAGACAATAGCGGTGCCCGAGAATTGATGTGTATTCGAATCATAGGAGCCAGTAATCGTAGATATGCTCATATTGGTGACGTTATTGTTGCTGTGATCAAGGAAGCAGTACCCAATACGCCTCTAGAAAGATCAGAAGTGATCAGAGCTGTAATTGTACGTACTTGTAAAGAACTCAGACGTGATAACGGTATGATAATACGGTACGATGACAATGCTGCAGTTGTCATTGATCACGAAGGAAATCCAAAGGGAACTCGAGTTTTTGGTGCGATCGCCCGGGAATTGAGACAGTTGAATTTTACTAAAATAGTTTCATTAGCACCTGAAGTATTATAA
Citrus reticulata	MW147176	0.4884	0.5851	42.6054	rpl16	ATGCTTAGTAACCCCAAAAGAACAAGATTCCGTAAACAACATAGAGGAAGAATGAAAGGGATATCTTATCGAGGTAATCATATTTGTTTCGGCAGATATGCTCTTCAAGCACTTGAACCCGCTTGGATCACATCTAGACAAATCGAAGCGGGGCGCCGCGCAATGACACGAAATGTACGGCGCGGTGGAAAAATATGGGTACGTATCTTTCCAGACAAACCAGTTACACTAAGACCCACGGAAACCCGTATGGGGTCCGGTAAAGGATCCCCCGAATATTGGGTAGCCGTCGTTAAACCGGGTAGAATACTTTATGAAATGAGTGGAGTAGCTGAAAATATAGCTCGAAAGGCTATTTCAATAGCGGCGTCCAAAATGCCTATAAGAACTCAATTCATT…
Citrus reticulata	MW147176	0.5106	0.5838	44.7792	rps3	ATGGGACAAAAAATAAATCCACTAGGTTTCCGGCTTGGTACAACACAAAGTCATCATTCTCTTTGGTTTGCAAAACCAAAAAACTATTGCGAGGGTCTACAAGAAGATCAAAAAATACGAAACTTTATTAAGAATTATATAAAAAAAAATAGCAGAATATCTTCCGGTGTTGAGGGAATTGCACGGATAGAGATTCAAAAAAGAATTGATCTAATTCAAGTTATAATCTATATAGGGTTCCCAAAATTATTACTAGAAAATAGACCGCGAAGAATTGAAGAATTACAGATGAATGTACAAAAAGAACTTAATTGTGTGAATCGAAAAATAAACATTGCTATTACACGAATTACAAATCCTTATGGACACCCCAATATTCTTGCCGAATTTATAGCCGGA…
Citrus reticulata	MW147176	0.4634	0.5185	47.2191	rpl22	ATGATAAGGATAATAAAGAAGAGGGTAGAAGTATCTGCTTTAGGTCAACATATATGTATGTCTGCTCACAAAGCCCGAAGGGTAATTGATCAGATTCGTGGACGTTCTTACGAGGAAACCCTTATGATACTCGAACTCATGCCTTATCGAGCATGTTATCCCATTTTAAAATTGGTTTATTCTGCAGCAGCAAATGGTATTCACAATCTGGGTTTCAACGAAGGAAGTTTATTCATTATTAAAGCCGAAGTAAACGAGGGTCCTACTGCGAAAAGATTAAAACCTCGAGCCCGAGGGCGGAGTTATCCGATCAAAAAACCCACTTGTCATATAACTATTGTTTTAAAAGATATATCCTTAGATGAATATGAATATAGAGACTATCTCGATCTCGAGTGC…
Citrus reticulata	MW147176	0.5417	0.4928	49.7899	rps19	GTGACACGTTCACTAAAAAAAAATCCTTTTGTAGCGAATCATTTATTAAGAAAAATCGATAAGCTTAATACAAAAGCGGAAAAAGAAATAATAATAACTTGGTCCCGGGCATCTACCATTATACCCACAATGGTCGGCCATACTATTGCTATCCATAATGGAAGGGAGCATTTGCCTATTTATATAACAGATCGTATGGTAGGACATAAATTGGGAGAATTTGCGCCCACTATCAATTTCCGTGGACATGCAAAAAATGATAATAGATCCCGTCGTTAA
Citrus reticulata	MW147176	0.4945	0.5054	55.29	rpl2	ATGGCGATACATTTATACAAAACTTCTACCCCGAGCACACGCAATGGAGCCGTAGACAGTCAAGTGAAATCCAATCCACGAAATAATTTGATCTATGGACAGCATCGTTGTGGTAAAGGTCGTAATGCCAGAGGAATCATTACCGCAGGGCATAGAGGGGGAGGTCATAAGCGTCTATACCGTAAAATCGATTTTCGACGGAATGAAAAAGACATATATGGTAGAATCGTAACCATAGAATACGACCCTAATCGAAATGCATACATTTGTCTCATACACTATGGGGATGGTGAGAAGAGATATATTTTACATCCCAGAGGGGCTATAATTGGAGATACCATTGTTTCTGGTACAGAAGTTCCTATAAAAATGGGAAATGCCCTACCTTTGACCGATATG…
Citrus reticulata	MW147176	0.5926	0.5075	61	rpl23	ATGGATGGAATCAAATATGCAGTATTTACAGACAAAAGTATTCGGTTATTGGGAAAAAATCAATATACTTCTAATGTCGAATCAGGATCAACTAGGACAGAAATAAAGCATTGGGTCGAACTCTTCTTTGGTGTCAAGGTAATAGCTATGAATAGTCATCAACTCCCCCGAAAGGGTAGAAGAATGGGACCTATTATGGCACATACAATGCATTACAGACGTATGATCATTACGCTTCAACCGGGTTATTCTATTCCACCTCTTAGAAAGAAAAGAACTTAA
Citrus reticulata	MW147176	0.5415	0.4406	53.6554	ycf2	ATGAAAGGACATCAATTCAAATCCTGGATTTTCGAATTGAGAGAGATATTGAGAGAGATCAAGAATTCTCACTATTTCTTAGATTCATGGACCCAATTCAATTCAGTGGGATCTTTCATTCACATTTTTTTCCACCAAGAACGTTTTATAAAACTCTTGGATCCACGAATTTGGAGTATCCTACTTTCACGCAATTCACAGGGTTCAACAAGCAATCGATATTTCACGATCAAGTGTGTAGTACTGTTTGTAGTAGCGATCCTTATATATCGTATTAACAATCGAAATATGGTCGAAAGAAAAAATCTCTATTTGACAGGGCTTCTTCCTATACCTATGAATTCCATTGGACCCAGAACTGATACATTGGAAGAATCTTTTGGGTCTTCCAATATCAAT…
Citrus reticulata	MW147176	0.5714	0.6875	46.5263	ycf15	ATGCTACTGCTGAAACATAGAAGAATTGAAATCTTAGATCAAAACACTATGTATGGATGGTATGAACTGCTTAAACAAGAATTCTTGAACAGCGAACCACCAGAGCTATTACTAACTACATCAAAAAATTTCCATTAA
Citrus reticulata	MW147176	0.4303	0.4538	50.2409	ndhB	ATGATCTGGCATGTACAGAATGAAAACTTCATTCTCGATTCTACGAGAATTTTTATGAAAGCCTTTCATTTGCTTCTCTTCGATGGAAGTTTTATTTTCCCAGAATGTATCCTAATTTTTGGCCTAATTCTTCTTCTGATGATCGATTCAACCTCTGATCAAAAAGATATACCTTGGTTATATTTCATCTCTTCAACAAGTTTAGTAATGAGCATAACGGCCCTATTGTTCCGCTGGAGAGAAGAACCTATGATTAGCTTTTCGGGAAATTTCCAAACGAACAATTTCAACGAAATCTTTCAATTTCTTATTTTACTATGTTCAACTCTATGTATTCCTCTATCCGTGGAGTACATTGAATGTACAGAAATGGCTATAACAGAGTTTCTGTTATTCGTA…
Citrus reticulata	MW147176	0.5135	0.5798	43.6563	rps7	ATGTCACGTCGAGGTACTACAGAAGAAAAAACTGCAAAATCCGATCCAATTTATCGTAATCGATTAGTTAACATGTTGGTTAACCGTATTCTGAAACACGGAAAAAAATCATTGGCTTATCAAATTATCTATCGAGCCTTGAAAAAGATTCAACAAAAGACAGAAAAAAATCCACTATCTGTTTTACGTCAAGCAATACGTGGAGTAACTCCCGATATAGCAGTAAAAGCAAGACGTGTAGGCGGATCGACTCATCAAGTTCCCATTGAAATAGGATCCGCACAAGGAAAAGCACTTGCCGTTCGTTGGTTATTAGGGGCATCCCGAAAACGTCCGGGTCGAAATATGGCTTTCAAATTAAGTTCCGAATTAGTGGATGCTGCCAAAGGGAGTGGCGAT…
Citrus reticulata	MW147176	0.5685	0.4122	46.7313	ndhF	ATGGAACATACATATCAATATTCCTGGATCATACCTTTAGTTCCACTTCCAGTCCCTATGTTAATAGGGGTGGGACTTCTATTTTTTCCGACCGCAACAAAAAATCTTCGCCGTATGTGGGCTTTTATTAGTATTTTATTGTTAAGTATAGTTATGATTTTTTCGATCGATCTATCTATTGAGCAAATAGATAGAACTTCGATCTATCAATCCCTAAGGAGTTGGACCATCACTAGTGATTTGTCTTTCGAGTTCGGATACTTTATTGATCCACTTACTTCTATTATGTCAATATTAATCACTACAGTTGGAATTCTGGTTCTTATTTATAGTGACAATTATATGTCTCATGATCAAGGATATTTGAGATTTTTTGCTTATATGAGTTTTTTCAATGCT…
Citrus reticulata	MW147176	0.8462	0.5	38.4474	rpl32	ATGGCAGTTCCAAAAAAACGTACTTCTATATTAAAAAAACGTATTCGTAAAAATCTTTGGAAAAAAGGGGGGTACTGGGCAGCGTTGAAGGCTTTTTCGTTAGCGAAATCCCTTGCTACTGGGAATTCAAAAAGTTTTTTTTGTACAACAAATAAATAA
Citrus reticulata	MW147176	0.5652	0.4646	55.7996	ccsA	ATGATATTTTCAACTTTGGAGCGTATATTAACGCATATATCCTTTTCGGTCGTTTCAATTGGAATTACAATTTATTTAATAACCTTCTTAGTCGATGAAATCATAGGGCTATATGCTTCATCAGAAAGGGGGATGACAGCTACCGCTTTCTGTCTAACAGGATTATTAATCACCCGTTGGGTTTACTCGAGACATTTCCCATTAAGTGATTTATATGAATCATTAATCTTTCTTTCATGGAGTTTCTCTATTATTCATAAGATTTTTGATTTTAAAAATAATCAAAATCATTTAAGCGCTATAACGGCACCAAGTGCTTTTTTTACCCAAGGCTTTGCGACTTCGGGTTTTTTAACCAAAATGCATCAATCCAGAATATTAGTACCCGCTCTCCAAGTC…
Citrus reticulata	MW147176	0.5091	0.4836	52.3282	ndhD	ACGAATTATTTTCCTTGGTTAACACTAATTGTAGTTTTTCCGATAGCCGCGGGTTCTTTAATTTTTTTTCTACCTCATAGAGGAAATAAGGTGACTAGAGGATATACAATATATATATGTGTCTTAGAACTCCTTCTAACGACCTATGCATTCTGTTATAATTTCCAATTGGACGATCCATTAATCCAGCTGGCAGAGGATTATAAATGGATCACTTTTTTTGAGTTTGACTGGCGATTGGGAATAGATGGACTTTCCATAGGACCCATTTTACTGACGGGATTTATCACCACTTTAGCTACTTTAGCGGCTCGGCCAGTTACTCTGAATTCCCGACTATTCCACTTCCTGATGTTAGCGATGTACAGCGGTCAAATAGGATCATTTTCTTCTCGGGAC…
Citrus reticulata	MW147176	0.5909	0.4833	53.6375	psaC	ATGTCACATTCAGTAAAGATTTATGATACATGTATAGGGTGTACTCAATGTGTACGAGCTTGCCCCACGGATGTATTAGAAATGATACCTTGGGACGGATGTAAAGCAAAGCAAATTGCTTCTGCTCCAAGAACAGAGGACTGTGTTGGTTGTAAGCGATGTGAATCCGCCTGTCCAACGGATTTCTTGAGTGTTCGAGTTTATTTATGGCATGAAACAACCCGAAGCATGGGTCTAGCTTATTGA
Citrus reticulata	MW147176	0.5758	0.3623	61	ndhE	ATGATGCTCGAGCATGTACTTGTTTTGAGTGCCTATTTATTTTCGATTGGCATCTATGGCTTGATTACGAGCCGAAATATGGTTCGGGCCTTGATGTGCCTTGAACTTATACTAAATGCAGTTAATATCAATTTTGTAACATTCTCTGATTTTTTTGATAGTCGACAATTAAAAGGAGATATTTTTTCAATTTTTGTTATAGCTATTGCAGCCGCTGAAGCAGCTATCGGATCAGCTATTGTTTCGTCAATTTATCGTAACAGAAAATCGACGCGTATCAATCAATCGACTTTGTTGAATAAGTAG
Citrus reticulata	MW147176	0.5	0.3953	60.3261	ndhG	ATGGATTTGCCTGGACCAATACACGATTTTCTTTTAGTTTTTCTGGGATCGGGTCTTATATTAGGAGGTCTGGGAGTGGTATTATTTACCAACCCAATTTATTCTGCCTTTTCCTTGGGATTGGTTCTTGTTTGTATATCATTATTCTATATTCTATCAAATTCCCATTTTGTAGCTGCCGCGCAACTCCTTATTTACGTGGGAGCTGTAAATGTTTTAATCATATTTGCTGTAATGTTCATGAACGGCTCAGACTATTCCAAAGATTTTCAGTTGAATCTTTGGACTATTGGCGATGGTCTTACTTCTCTGGTTTGTACAAGTATTTTTTTTTCGCTAATCACTACTATTCTCGATACATCGTGGTACGGGATTATTTGGACTACACGAGCCAACCAG…
Citrus reticulata	MW147176	0.4865	0.4122	43.3049	ndhI	ATGTTCCCTATGGTAACCGGTTTCATGAATTATGGTCAACAAACAATACGAGCTGCAAGGTACATTGGTCAAAGTTTCATGATTACTTTATCCCAAGCAAATCGTTTACCTGTAACTATTCAATATCCTTATGAAAAATTAATCCCATCAGAGCGTTTTCGTGGTCGAATCCATTTTGAATTTGATAAATGTATTGCTTGTGAAGTATGCGTTCGGGTATGTCCTATAGATCTGCCTGTTGTTGATTGGAAATTTGAAACAGATATTCGAAAGAAACGATTGCTTAATTACAGTATTGATTTTGGAATTTGTATTTTTTGTGGTAACTGCGTTGAGTATTGTCCAACAAATTGTTTATCAATGACTGAAGAATATGAACTTGCGACTTACGACCGTCAC…
Citrus reticulata	MW147176	0.4835	0.4835	51.5	ndhA	ATGATAATTGCTACACCCGAAGTACAAGATATCAATTCTTTTTCCCGATTGGAATCCCTACAAGAGGTCTATGGGATCCTATGGGTGCTTGCCCCTATTTCGATTTATGTATTGGCAATCACAATAGGTGTCCTAGTAATTGTGTGGTTAGAAAGAGAAATATCTGCAGGAATACAACAGCGTATTGGGCCTGAATACGCCAGCCCTTTGGGAATTCTTCAAGCTTTAGCCGATGGGACAAAACTCCTTTTCAAAGAAAACCTTCTTCCATCTAGAGGAAATAGTAGTTTATTCAGTATTGGTCCATCTATAGCAGTCATAGCAATTCTACTAAGTTATTCAGTAATTCCTTTTAGTTATAACCTTGTTTTAGCTGACCTCAATATCGGTATTTTTTTA…
Citrus reticulata	MW147176	0.5766	0.4982	51.9549	ndhH	ATGAGTATACTAGCTACAGAAAAAGAAAAAGAATTTATGATAGTCAATATGGGACCTCACCACCCGTCAATGCATGGGGTTCTTCGTCTCATCGTTACTCTAGACGGTGAAGATGTTATTGACTGTGAACCAATATTGGGTTATTTACACAGAGGGATGGAAAAAATTGCGGAAAACCGAACAATTATACAATATCTGCCTTATGTAACCCGTTGGGATTATTTAGCTACTATGTTCACAGAAGCAATAACTGTAAATGGACCAGAACTGTTGGGAAATATTCGCGTACCTAAAAGGGCCAGCTATATCAGAGTAATTATGTTGGAGTTGAGTCGTATAGCTTCCCATCTGTTATGGCTTGGCCCTTTTATGGCAGATATTGGTGCACAGACTCCTTTC…
Citrus reticulata	MW147176	0.5385	0.6	59.2202	rps15	ATGGTAAAAAATGCATTCATCTCAGTTAGGGTTCAAGAAAAAAAAGAAAAAAACAGCGGATCGGTTGAATTTCAAGTATTTCGTTTCACCAACAAGATCCGGAGACTTACTTCACATTTAGAATTGCACAGAAAAGACTATTCATCTCAAAGGGGTCTACGTAAAATTTTGGAAAAACGCCAACGTCTACTAGCTTATTTGTCAAAGAAAAATAGAGTACGTTATAAAGAATTAATTAGTAAGTTGAATATCCGGGAGTCAAAAAATCGTTAA
Citrus reticulata	MW147176	0.5368	0.5145	49.1239	ycf1	ATGATTTTTCAATCTTTTATACTAGGTAATCTAGTATCCTTATGCATGAAGATAATCAATTCGGTCGTTGTGGTCGGACTCTATTATGGATTTATGACCACATTCTCCATAGGGCCCTCTTATCTCTTCCTTCTCCGAGCTCGGGTTATGGAAGAAGGAGAAGAAGGAACCGAGAAGAAGGTATCAGCAACAACTGGTTTTATTGCGGGACAGCTCATGATGTTCATATCGATCTATTATGCGCCTCTGCATCTAGCATTGGGTAGACCGCATACAATAACTGTCCTAGCTCTACCGTATCTTTTGTTTCATTTCTTCTGGAACAATCCCAAACACTTTTTTGATTATGGATCTACTACCAGAAATTCAATGCGTAATCTTAGCATTCAATGTGTATTC…
Citrus reticulata	MW147176	0.5135	0.5798	43.6563	rps7	ATGTCACGTCGAGGTACTACAGAAGAAAAAACTGCAAAATCCGATCCAATTTATCGTAATCGATTAGTTAACATGTTGGTTAACCGTATTCTGAAACACGGAAAAAAATCATTGGCTTATCAAATTATCTATCGAGCCTTGAAAAAGATTCAACAAAAGACAGAAAAAAATCCACTATCTGTTTTACGTCAAGCAATACGTGGAGTAACTCCCGATATAGCAGTAAAAGCAAGACGTGTAGGCGGATCGACTCATCAAGTTCCCATTGAAATAGGATCCGCACAAGGAAAAGCACTTGCCGTTCGTTGGTTATTAGGGGCATCCCGAAAACGTCCGGGTCGAAATATGGCTTTCAAATTAAGTTCCGAATTAGTGGATGCTGCCAAAGGGAGTGGCGAT…
Citrus reticulata	MW147176	0.4303	0.4538	50.2409	ndhB	ATGATCTGGCATGTACAGAATGAAAACTTCATTCTCGATTCTACGAGAATTTTTATGAAAGCCTTTCATTTGCTTCTCTTCGATGGAAGTTTTATTTTCCCAGAATGTATCCTAATTTTTGGCCTAATTCTTCTTCTGATGATCGATTCAACCTCTGATCAAAAAGATATACCTTGGTTATATTTCATCTCTTCAACAAGTTTAGTAATGAGCATAACGGCCCTATTGTTCCGCTGGAGAGAAGAACCTATGATTAGCTTTTCGGGAAATTTCCAAACGAACAATTTCAACGAAATCTTTCAATTTCTTATTTTACTATGTTCAACTCTATGTATTCCTCTATCCGTGGAGTACATTGAATGTACAGAAATGGCTATAACAGAGTTTCTGTTATTCGTA…
Citrus reticulata	MW147176	0.5714	0.6875	46.5263	ycf15	ATGCTACTGCTGAAACATAGAAGAATTGAAATCTTAGATCAAAACACTATGTATGGATGGTATGAACTGCTTAAACAAGAATTCTTGAACAGCGAACCACCAGAGCTATTACTAACTACATCAAAAAATTTCCATTAA
Citrus reticulata	MW147176	0.5415	0.4406	53.6554	ycf2	ATGAAAGGACATCAATTCAAATCCTGGATTTTCGAATTGAGAGAGATATTGAGAGAGATCAAGAATTCTCACTATTTCTTAGATTCATGGACCCAATTCAATTCAGTGGGATCTTTCATTCACATTTTTTTCCACCAAGAACGTTTTATAAAACTCTTGGATCCACGAATTTGGAGTATCCTACTTTCACGCAATTCACAGGGTTCAACAAGCAATCGATATTTCACGATCAAGTGTGTAGTACTGTTTGTAGTAGCGATCCTTATATATCGTATTAACAATCGAAATATGGTCGAAAGAAAAAATCTCTATTTGACAGGGCTTCTTCCTATACCTATGAATTCCATTGGACCCAGAACTGATACATTGGAAGAATCTTTTGGGTCTTCCAATATCAAT…
Citrus reticulata	MW147176	0.5926	0.5075	61	rpl23	ATGGATGGAATCAAATATGCAGTATTTACAGACAAAAGTATTCGGTTATTGGGAAAAAATCAATATACTTCTAATGTCGAATCAGGATCAACTAGGACAGAAATAAAGCATTGGGTCGAACTCTTCTTTGGTGTCAAGGTAATAGCTATGAATAGTCATCAACTCCCCCGAAAGGGTAGAAGAATGGGACCTATTATGGCACATACAATGCATTACAGACGTATGATCATTACGCTTCAACCGGGTTATTCTATTCCACCTCTTAGAAAGAAAAGAACTTAA
Citrus reticulata	MW147176	0.4945	0.5054	55.29	rpl2	ATGGCGATACATTTATACAAAACTTCTACCCCGAGCACACGCAATGGAGCCGTAGACAGTCAAGTGAAATCCAATCCACGAAATAATTTGATCTATGGACAGCATCGTTGTGGTAAAGGTCGTAATGCCAGAGGAATCATTACCGCAGGGCATAGAGGGGGAGGTCATAAGCGTCTATACCGTAAAATCGATTTTCGACGGAATGAAAAAGACATATATGGTAGAATCGTAACCATAGAATACGACCCTAATCGAAATGCATACATTTGTCTCATACACTATGGGGATGGTGAGAAGAGATATATTTTACATCCCAGAGGGGCTATAATTGGAGATACCATTGTTTCTGGTACAGAAGTTCCTATAAAAATGGGAAATGCCCTACCTTTGACCGATATG…
Citrus reticulata	MW147176	0.5417	0.4928	49.7899	rps19	GTGACACGTTCACTAAAAAAAAATCCTTTTGTAGCGAATCATTTATTAAGAAAAATCGATAAGCTTAATACAAAAGCGGAAAAAGAAATAATAATAACTTGGTCCCGGGCATCTACCATTATACCCACAATGGTCGGCCATACTATTGCTATCCATAATGGAAGGGAGCATTTGCCTATTTATATAACAGATCGTATGGTAGGACATAAATTGGGAGAATTTGCGCCCACTATCAATTTCCGTGGACATGCAAAAAATGATAATAGATCCCGTCGTTAA
Citrus sinensis	ON641345	0.4	0.5246	54.8529	rps12	ACTATCACCCCCAAAAAACCAAACTCTGCCTTACGTAAAGTTGCCAGAGTACGATTAACCTCTGGGTTTGAAATCACTGCTTATATACCTGGTATTGGCCATAATTCACAAGAACATTCTGTAGTCTTAGTAAGAGGGGGGAGGGTTAAGGATTTACCCGGTGTGAGATATCACATTGTTCGAGGAACCCTAGATGCTGTCGGAGTAAAGGATCGTCAACAAGGGCGTTCTAAATATGGGGTCAAAAAGCCAAAATAA
Citrus sinensis	ON641345	0.3675	0.3122	34.1287	psbA	ATGACTGCAATTTTAGAGAGACGCGAAAGCGAACGCCTATGGGGTCGCTTCTGTAACTGGATAACTAGCACTGAAAACCGCCTTTACATTGGTTGGTTTGGTGTTTTGATGATCCCTACTTTATTGACCGCAACTTCTGTATTTATTATCGCCTTCATTGCTGCTCCTCCAGTAGATATTGACGGTATTCGTGAACCTGTTTCTGGATCTCTACTTTATGGAAACAATATTATTTCTGGTGCGATTATTCCTACTTCTGCAGCTATAGGTTTGCATTTTTACCCGATATGGGAAGCGGCATCCGTTGATGAATGGTTATACAATGGCGGTCCTTATGAGCTAATTGTTCTACACTTCTTACTTGGTGTAGCTTGTTACATGGGTCGTGAGTGGGAACTT…
Citrus sinensis	ON641345	0.5679	0.4023	49.4111	matK	ATGGAGGAATTTCAAGTATATTTAGAACTAGATAGATCTCAACAACACGACTTCCTATACCCACTTCTTTTTCGGGAGTATATTTATGTACTTGCTCATGATCATGGTTTAAATAGCTCGATGATGTCATTGGAAGGTGGGTTTTATGACAATAAATCTAGTTCACTAAGTGTGAAACGGTTAATTACTAGAATGTATCAACGGATTAATTTGAGTATTGCTGCTAATGATTCGAATCAAAATCCGATTTTTGGGCACAACAATAAGTTATATTCTCAAATTATATCAGAGGTATTTGCTGCTGTGGTGGAAATTCCATTTTCCCTACGGTTGGTGGCTTTTTTAGAAGGGAAAGAAATTGAAAAATCGCCTAATTTCCAATCAATTCATTCAATATTT…
Citrus sinensis	ON641345	0.55	0.4348	51.2299	rps16	ATGGTAAAACTTCGTTTGAAACGATGTGGTAGAAAGCAACGAGCCGTTTATCGAATCGTTGCAATTGATGGTCGATCCCGAAGAGAAGGAAGAGATCTTCGGAAAGTGGGTTTTTATGATCCGATAAATAATCAAACCCATTTAAATGTTCCTGCTATTCTATATTTCCTTGCCAAGGGCGCTCAACCTACAGGAACCGTTCATGATATTTCACAGAAAGCGGGGGTTTTTACAGAAGTTAGTCTTAATCAAACGAAATTCTATTAA
Citrus sinensis	ON641345	0.4375	0.3261	32.9203	psbK	ATGCTTAATATCTTTAGTTTAATGTATATCTGTCTTAATTCTGCCCTTTATTCGAGTAGTTTTTTATTCGCTAAATTACCCGAGGCCTACGCTTTTTTGAATCCAATTGTAGATGTTATGCCAGTAATACCTGTTCTATTTTTTCTCTTAGCCTTTGTTTGGCAAGCTGCTGTAAGTTTTCGATAA
Citrus sinensis	ON641345	0.2941	0.45	61	psbI	ATGCTTACTCTCAAACTCTTTGTTTACACCGTAGTGATATTCTTTGTTTCGCTCTTCATCTTCGGATTCCTGTCTAATGATCCAGGGCGTAATCCCGGACGCGAAGAATAA
Citrus sinensis	ON641345	0.5099	0.5014	50.8964	atpA	ATGACAACAATTAAAGCCGACGAAATTAGTAATATTATCCGCGAACGTATTGAGCAATATAATAGAGAAGTAAAGATTGTAAATATTGGGACCGTACTTCAAGTAGGCGACGGCATCGCCCGTATTTATGGTCTTGATGAAGTAATGGCAGGTGAATTAGTAGAATTTGAAGAGGGTACAATAGGCATTGCTCTGAATTTGGAATCAACTAATGTTGGTGTTGTTTTAATGGGTGACGGTTTAATGATACAAGAAGGAAGTTCTGTAAAAGCAACCGGAAAAATTGCTCAGATACCAGTAAGCGAGGCTTATTTAGGTCGTGTTATAAATGCCCTGGCTAAACCTATTGATGGTCGAGGTGAAATTTCAGCTTCTGAATCTCGATTAATTGAATCCCCT…
Citrus sinensis	ON641345	0.6034	0.5197	53.8495	atpF	ATGAAAAATGTAACCGATTCTTTCGTTTCTTTGGTTAACTGGCCATTCGCCGGGAGTTTCGGGCTTAATACCGATATTTTAGCAACAAATCCAATAAATCTAAGTGTAGTGCTTGGTGTATTGATCTTTTTTGGAAAGGGAGTGTTAAGTGATTTATTAGATAATCGCAAACTGAGGATTTTGAATAGTATTCGAAATTCAGAAGAACTGCAGAGAGGGGCCATTGAACGGCTGGAAAAAGCCCGGGCCCGGTTACGAAAAATAGAAATAGAAGCAGATCAGTTTCGAGTGAATGGATACTCTGAGATAGAACGAGAAAAATTCAATTTGATTAATTCAACTTATAAGACTTTGGATCAATTAGAAAATTACAAAAATGAAACCATTCATTTTGAACAA…
Citrus sinensis	ON641345	0.7826	0.3898	59.3551	atpH	ATGAATCCACTGATTTCTGCCGCTTCCGTTATTGCTGCTGGGTTGGCTGTTGGGCTTGCTTCTATTGGACCTGGAGTTGGTCAAGGTACTGCTGCGGGCCAGGCAGTAGAAGGGATCGCGAGACAGCCCGAGGCAGAGGGAAAAATACGAGGTACTTTATTGCTTAGTCTGGCTTTTATGGAAGCTTTAACAATTTATGGGCTGGTTGTAGCATTAGCACTTTTATTTGCGAATCCTTTTGTTTAA
Citrus sinensis	ON641345	0.4384	0.4286	48.1338	atpI	ATGAATGTTCTATCATGTTCCATGAATACACTAAGGGGGTTATACGATATATCCGGTGTGGAAGTAGGCCAACATTTCTATTGGCAAATAGGTGGGTTCCAGGTCCATGCCCAAGTACTTATTACTTCTTGGGTTGTAATTGCTATCTTATTAGGTTCAGCCTTTATAGCCGTTCGGAATCCACAAACCGTTCCGACTGCCACTCAAAATTTCTTCGAATATGTCCTTGAATTCATTCGAGACGTGAGCAAAACTCAGATTGGAGAAGAATATGGCCCATGGGTTCCCTTTATTGGAACTCTGTTTCTTTTTATTTTTGTTTCTAATTGGTCAGGTGCTCTTTTACCTTGGAAAATCATAGAGTTACCTCATGGGGAGTTAGCCGCACCCACGAATGAT…
Citrus sinensis	ON641345	0.5676	0.4601	58.7103	rps2	ATGGCAAGAAGGTATTGGAACATCCATTTGGAAGAGATGATGGAAGCAGGAATTCATTTTGGTCATGGTACTCGGAAATGGAATCCTAGAATGGCACCTTATATATCTGCAAAACATAAAGGTATTCATATTACAAATCTGACTCGAACTGCTCGGTTTTTATCAGAAGCTTGTGATTTAGTTTTTGATGCAGCAAGTAGGGGAAAACAATTCTTAATTGTTGGTACTAAAAATAAAGCAGCTGATTTAGTCGCGCGAGCTGCAATAAGGGCTCGGTGCCATTATGTTAATCAAAAATGGCTCGGCGGTATGTTAACCAATTGGTCCACTACAGAAACGCGACTTCACAAGTTCAGGGATTTGAGAACGGAACAAAAAGGGGGGAGACTCGACAGTCTT…
Citrus sinensis	ON641345	0.574	0.4679	52.579	rpoC2	ATGGCAGAACGGGTGAGTCTGGTCTTTCACAATAAAATGATAGATGGAACTGCCATTAAACGACTTATTAGCAGGTTAATAGATCACTTCGGAATGGCATATACATCCCACATCCTGGATCAAGTAAAGACCCTGGGGTTCCAGCAAGCCACTGCTACATCTATTTCATTAGGCATTGATGATCTTTTAACGATACCTTCTAAGCGATGGCTAGTCCAAGATGCTGAACAACAAAGTTTTATTTTGGAAAAACACTATCATTATGGGAATGTACACGCGATAGAAAAACTACGACAATCCATTGAGATATGGTATGCTACAAGTGAATATTTGCGACAAGAAATGAATCCTAATTTTAGGATGACTGAGCCTTTTAATCCAGTCCATATAATGTCTTTT…
Citrus sinensis	ON641345	0.58	0.4678	50.6314	rpoC1	ATGATTGATCGATATAAACATCAACAACTCCGAATTGGATCAGTTTCTCCTCAACAAATACGCGCTTGGGCCAATAAAATCCTACCTAATGGAGAGATAATTGGAGAAGTGACAAAACCCTATACTTTTCATTACAAAACCAATAAACCGGAAAAAGATGGATTATTTTGTGAAAGAATTTTTGGGCCTATTAAAAGTGGAATTTGTGCTTGTGGAAATTATCGAATAATCGGAGATGAAAAAGAAGACCCGCAATTTTGTGAACAATGTGGGGTTGAATTTGTTGATTCTCGGATACGAAGATATCAAATGGGATACATAAAACTGGGATGCCCAGTAACCCACGTGTGGTATTTGAAACGTCTTCCTAGTTATATCGCGAATCTTTTAGATAAACCT…
Citrus sinensis	ON641345	0.6189	0.4939	50.9129	rpoB	ATGCTCGGAGATGGAAATGCAGGAATGTCTACAATACCTGGGTTGAATCAGATACAATTTGAAGGATTTTGTAGGTTCATTGATCAGGGCTTAACAGAAGAGCTTTATAAGTTTCCAAAAATTGAAGATACAGATCAAGAAATTGAATTTCAATTATTTGTGGAAACATATCAATTGGTAGAACCCTTGCTAAAAGAAAGAGATGCTGTATATGAATCATTCACGTATTCTTCTGAATTATATGTATCCGCAGGATTAATTTGGAAAAGCCGAGGGGACATGCAGGAACAAACTATTTTTATTGGAAACATTCCTCTAATGAATTCTTTGGGAACTTCTATAGTAAACGGAATATACAGAATTGTCATCAATCAAATATTGCAAAGTCCCGGTATCTAT…
Citrus sinensis	ON641345	0.5455	0.5263	29.2857	petN	ATGGATATAGTAAGTCTCGCTTGGGCTGCTTTAATGGTAGTCTTTACATTTTCCCTTTCGCTCGTAGTATGGGGAAGAAGTGGACTCTAG
Citrus sinensis	ON641345	0.5556	0.4231	45.1818	psbM	ATGGAAGTAAATATTCTCGCATTTATTGCTACTACACTGTTCGTTCTAGTTCCTACTGCGTTTTTGCTTATAATATACGTAAAAACGGTCAGTCAAAGTGATTAA
Citrus sinensis	ON641345	0.4472	0.3766	51.395	psbD	ATGACTATAGCCCTTGGTAAATTTACCAAAGAGGAAAAGGATTTATTTGATATTATGGATGACTGGTTACGGAGGGACCGATTCGTTTTTGTAGGTTGGTCTGGCCTATTGCTCTTTCCTTGTGCCTATTTCGCTTTAGGGGGTTGGTTCACAGGCACAACCTTTGTAACTTCATGGTATACCCATGGATTAGCCAGTTCCTATTTGGAAGGCTGCAACTTCTTAACCGCCGCAGTTTCGACTCCTGCTAATAGTTTAGCGCATTCTTTGTTGTTACTATGGGGTCCTGAAGCACAAGGAGATTTTACTCGCTGGTGTCAATTAGGCGGTCTTTGGACTTTTGTTGCTCTACACGGTGCTTTCGGACTAATAGGTTTCATGTTACGTCAATTTGAACTT…
Citrus sinensis	ON641345	0.5034	0.3912	49.7855	psbC	GTGGAAACGCTCTTTAATGGAACTTTAGCTGTAGCAGGTCGTGACCAAGAAACCACCGGTTTCGCTTGGTGGGCCGGGAATGCCCGACTTATCAATTTATCCGGTAAACTGCTGGGCGCTCATGTAGCCCATGCTGGATTAATCGTATTCTGGGCCGGAGCAATGAACCTATTTGAAGTGGCTCATTTCGTACCAGAAAAGCCCATGTATGAACAAGGATTAATTTTACTTCCCCACCTAGCTACTCTAGGCTGGGGGGTAGGTCCTGGTGGGGAAGTTATAGACACCTTTCCATACTTTGTATCTGGAGTACTTCACTTAATTTCCTCTGCAGTATTGGGCTTTGGCGGTATTTATCATGCACTTCTGGGACCTGAGACTCTTGAAGAATCTTTTCCA…
Citrus sinensis	ON641345	0.5263	0.3409	52.7462	psbZ	ATGACTATTGCTTTCCAATTGGCTGTTTTTGCATTAATTGCTACTTCATCAATCTTACTGATTAGTGTACCCGTTGTATTTGCTTCTCCGGATGGTTGGTCGAGTAACAAAAATGTCGTATTTTCTGGTACATCATTGTGGATTGGATTAGTCTTTCTGGTGGGTATCCTTAACTCTCTCATTTCTTAA
Citrus sinensis	ON641345	0.6857	0.5606	46.6303	rps14	ATGGCAAGGCAAAGTTTGATTCAGAGGGAAAAGAAAAGGCACAAATTGGAACAAAAATATCATTTGATTCGTCGATCCTCAAAAAAAGAAATAAACAAAGCTCCATCGTTGAGCGATAAATGGAAAATTCATGGAAAGTTACAATCCTCACCGCGTAATAGTGCACCTACCCGTCTTCATCGACGTTGTTTTTTGACCGGAAGGCCGAGAGCTAACTATCGAGACTTTGGACTATCCGGACACATACTTCGTGAAATGGTTCATGCGTGTTTGTTGCCGGGGGCAACAAGATCAAGTTGGTAA
Citrus sinensis	ON641345	0.5669	0.3701	52.9645	psaB	ATGGCATTAAGATTTCCAAGGTTTAGCCAAGGCTTAGCTCAGGACCCCACTACTCGTCGTATTTGGTTTGGTATTGCTACCGCACATGACTTCGAGAGTCATGATGATATTACTGAGGAACGTCTTTATCAGAATATTTTTGCTTCGCACTTCGGGCAATTAGCAATAATTTTTCTGTGGACTTCCGGAAATCTCTTTCATGTAGCTTGGCAAGGAAATTTTGAGGCATGGGTACAGGACCCTTTACATGTAAGACCTATTGCTCATGCAATTTGGGATCCTCATTTTGGTCAACCGGCCGTGGAAGCTTTTTCTCGGGGAGGTGCTCTTGGCCCGGTGAATATCGCTTATTCTGGTGTTTATCAGTGGTGGTATACAATCGGTTTACGCACTAATGAG…
Citrus sinensis	ON641345	0.5076	0.4274	51.7248	psaA	ATGATTATTCGTTCGCCGGAACCAGAAGTAAAAATTTTGGTAGATAGGGATCCCGTAAAAACTTCTTTCGAGGAATGGGCCAAACCGGGGCATTTCTCAAGAACCATAGCTAAGGGACCTGAGACTACCACTTGGATCTGGAACCTACATGCTGATGCTCACGACTTCGATAGCCATACCAGTGATTTGGAGGAGATCTCTCGAAAAGTATTTAGTGCCCATTTCGGACAACTCTCCATCATTTTTCTTTGGCTGAGCGGAATGTATTTCCACGGTGCTCGTTTTTCCAATTATGAAGCCTGGCTAAGCGATCCTACTCACATTGGACCTAGCGCACAGGTGGTTTGGCCAATAGTGGGCCAAGAAATATTGAACGGTGATGTGGGCGGGGGTTTCCGA…
Citrus sinensis	ON641345	0.5926	0.4609	46.9012	pafI	ATGCCTAGATCGCGGATAAACGGAAATTTTATTGATAAGACCTTTTCGATTGTAGCCAATATATTATTACGAATAATTCCGACAACTGTAGGAGAAAAAGAGGCATTTACCTATTACAGAGATGGGATGTCAGCTCAATCTGAAGGCAATTATGCGGAAGCTTTACAGAATTATTATGAAGCTATGCGACTAGAAATTGATCCTTACGATCGAAGCTATATACTCTATAACATAGGCCTTATCCACACAAGTAACGGAGAACATACAAAAGCTTTAGAATATTATTTTCGGGCACTAGAACGAAATCCGTTCTTACCACAAGCTTTTAATAATATGGCTGTGATCTGTCATTACCGGGGGGAACAGGCCGTTCGACAGGGAGATTCTGAAATTGCGGAG…
Citrus sinensis	ON641345	0.4906	0.4966	46.3691	rps4	ATGTCACGTTACCGAGGGCCTCGTTTCAAAAAAATACGCCGTCTGGGGGCTTTGCCGGGACTAACGAGTAAAAGGCCTAGAGCCGGAAGCGATTTTAGAAACCAATTGCGCTCCGTAAAAAAATCTCAATATCGAATTCGTTTAGAAGAAAAACAAAAATTGCGTTTTCATTATGGTCTTACAGAACGACAATTACTTAAATATGTTCGTATCGCCAGAAAAGCCAAAGGGTCAACCGGTCTGGTTTTACTACAATTACTTGAAATGCGTTTGGATAACATTCTTTTTCGATTGGGTATGGCTTCAACTATTCCTCAAGCCCGCCAATTGGTTAACCATCGACATATTTTAGTTAATGGTCGTATAGTCGATATACCAAGTTATCGTTGCAAACCCCGA…
Citrus sinensis	ON641345	0.6226	0.4245	50.4114	ndhJ	ATGCAGGGTCGTTTGTCTGCTTGGCTGGTCAAGCATGGGCTAGTTCATAGATCTTTGGGCTTTGATTACCAAGGAATAGAAACTTTACAAATAAAGCCCGAGGATTGGCACTCCGTTGCTGTCATTTTGTATATATATGGCTACAATTATCTACGGTCCCAATGTGCCTATGATGTAGCACCGGGCGGACTGTTAGCCAGTGTGTATCATCTTACGCGAATAGAGTATGGTGTAGATCAACCAGAAGAGGTATGCATAAAAGTATTTGCTCCAAGGAGTAATCCTAAAATTCCATCGGTTTTCTGGGTTTGGAAAAGTGCGAATTTTCAAGAACGGGAATCTTATGATATGCTGGGAATCCTTTATGATAATCATCCACGACTGAAACGTATCTTAATG…
Citrus sinensis	ON641345	0.5224	0.4472	55.1342	ndhK	ATGAATTCTATTGAATTTTCCTTACTTGATCGAACAACCCCAAATTCATTTATTTCAACTACATCAAACGATCTTTCAAATTGGTCAAGACTCTCCAGCTTATGGCCGCTTCTTTATGGTACCAGTTGTTGTTTCATTGAATTTGCTTCATTAATCGGCTCGCGGTTCGATTTTGACCGTTATGGGCTGGTACCAAGATCGAGCCCTAGACAGGCGGACCTAATTTTAACAGCTGGTACAGTAACAATGAAAATGGCTCCTTCTTTAGTGAGATTATATGAACAAATGCCTGAACCAAAATATGTTATTGCTATGGGAGCATGTACAATTACAGGGGGGATGTTCAGTACCGATTCGTATAGTACTGTTCGAGGAGTTGATAAGCTAATTCCCGTGGAT…
Citrus sinensis	ON641345	0.6111	0.4118	61	ndhC	ATGTTTCTGCTTTACAAATATGATATTTTCTGGGCATTTCTAATAATATCAAGCGTTATTCCTATTTTGGCATTTCTAATTTCCGCAGTTTTAGCCCCGATTAACAAAGGGCCAGAGAAACTTTCTAGTTATGAATCGGGTATCGAACCAATGGGCGATGCTTGGTTACAATTTCGAATCCGGTATTATATGTTTGCTCTAGTTTTTGTTGTTTTTGATGTTGAAACCGTTTTTCTTTATCCATGGGCAATGAGTTTTGATGTATTGGGGGTACCCGTATTTATAGAAGCTTTCATTTTCATGCTTATCCTAATTGTTGGTTTAGTTTATGCGTGGCGAAAAGGAGCATTAGAGTGGTCTTAG
Citrus sinensis	ON641345	0.561	0.4839	58.3241	atpE	ATGACCTTAAATCTTTGTGTACTGACCCCTAATCGAATTGTTTGGGATTCAGAAGTGAAAGAAATCATTTTATCTACTAATAGTGGACAAATCGGCGTATTACCAAATCACGCGCCTATTGCCACAGCTGTAGATATAGGTATTTTAAGAATCCGCTTTAACGACCAATGGTTAACGATGGCTCTGATGGGTGGTTTTGCTAGAATAGGGAATAATGAGATCACTATTTTAGTAAATGATGCGGAGAAGAGTAGTGACATTGATCCCCAAGAAGCCCAGCAAACTCTTGAAATAGCAGAAGCTAATTTGAGGAAAGCTGAAAGCAAGAGACAAACAATTGAGGCAAATCTAGCTCTCAGACGAGCTAGGACACGAGTAGAGGTTATCAATGCGATTTCA…
Citrus sinensis	ON641345	0.5092	0.4673	51.3522	atpB	ATGAGAATAAATCCTACTACTTCCGGTCCTGGGGTTTCCGCGTTTGCAAACAAAAACCTAGGACATATCGCTCAAATCATTGGTCCGGTACTGGATGTAGCCTTTCCCCCCGGCAAGATGCCTAATATTTACAATGCTCTGGTAGTTAAGGGTCGAGATACTGTCGATCAACCAATTAATGTGACTTGCGAGGTACAGCAATTATTAGGGAATAATCGAGTTAGAGCTGTAGCCATGAGTGCTACAGATGGTCTAACGAGGGGTATGGAAGTAATTGACACGGGAGCTCCTCTAAGTGTTCCAGTCGGCGGAGTGACTCTAGGACGAATTTTCAACGTGCTTGGAGAGCCCGTTGATAATTTAGGTCCTGTAGATACTCGCACAACATCCCCTATTCAT…
Citrus sinensis	ON641345	0.5063	0.4057	51.6561	rbcL	ATGTCACCACAAACAGAGACTAAAGCGAGTGTTGGATTCAAGGCCGGTGTTAAAGATTATAAATTGACTTATTATACTCCTGACTATGTAACCAAAGATACTGATATCTTGGCAGCATTCCGAGTAACTCCTCAGCCCGGAGTTCCACCCGAGGAAGCGGGGGCTGCGGTAGCTGCGGAATCTTCTACTGGTACCTGGACAGCTGTGTGGACCGATGGGCTTACCAGCCTTGATCGTTACAAAGGGCGATGCTACAACATTGAGCCCGTTGCTGGAGAAGAGAATCAATATATATGTTATGTAGCTTACCCGTTAGACCTTTTTGAAGAAGGTTCTGTTACTAACATGTTTACTTCCATTGTGGGTAATGTATTTGGTTTCAAAGCACTGCGCGCTCTA…
Citrus sinensis	ON641345	0.5211	0.359	47.8066	accD	ATGAAAAAATGGTGGTTCAATTCGATGTTATCTAAGGGTAAGGGGGAATTAGAATACAGGTGTTGGTTAAGTAAATCAATGGAGAGCCCTGGTCCTATTAAAAATCCCAGTGTAAGCGAGGAACTGATTAGAAATGATAAGAATAAAAACATTCATAGTTCGAGCGATAGTGACAGTTCAAGTTACAGCAAATTAGCTGGTGTCAGGGACATTCATAATTTCATCTCGGATGACACTTTTTTTGTTAAGGATAGTAATAGAGATAGTTATTCCATCTATTTTGATATTGAAAATCAAATTTTGGAACTAGACAATGCTCATTCTTTTCTGAGTGAACTAGAAAGTTCTTTTTATAGCTTTCGTAATTATAGTTCGAGGAATAATGGATCTAAAAGCGCT…
Citrus sinensis	ON641345	0.6429	0.4167	61	psaI	ATGACAATTCTCAACAGCTTTCCCTCTATTTTTGTGCCTTTAGTGGGCCTAGTATTTCCGGCAATGGCAATGGCTTCGTTATTTCTTTATCTTGAAAAAAATAAGATTTTGTAA
Citrus sinensis	ON641345	0.5373	0.4237	61	pafII	ATGAGTTGGCGATCAGAATATATATGGGTAGAATTTATAGCGGGCTCTCGCAAACCAGGCAATTTCTTCTGGGCCTTTATCCTTTTTTTAGGCTCATTAGGATTCTTAGTGGTTGGAATTTCTAGTTATCTTGATAGGAATTTGCTATCTTTATTTCCGTCGCAGCAAATCAATTTTTTTCCACAAGGGATCGTGATGTCTTTCTACGGGATCGCGGGTCTCTTTATTAGTTCCTATTTGTGGTGCACAATTATATGGAATGTAGGTAGCGGTTATGATCGATTTGATACAAAAGAGGGAATAGTGTGTATTTTTCGTTGGGGATTTCCTGGAAAAAATCGCCGCATCTTTCTACGATTCCTTATGAAAGATATTCAGTCCATCAGAATAGAAGTTAAA…
Citrus sinensis	ON641345	0.4795	0.4074	60.0214	cemA	ATGACAAAAAAGAACGCATCCATTCCCCTTAGATATCTTTCATCTATAGTATTTGTAGTATTTTTGCCCTGGTGGATCCCTCTCTCATTTAATAAAAGTCTGGAATCCTGGGTTACTAATTGGTGGAATACTAGTCAATCCGAAACCTTTTTGAATGATATTCAAGAAAAGGCTATTCTAGAAAAATTCATAGAATTAGAGGAATTATTTCTCTTGGACGAAATGATAAAGGAATTTCCGGAAAGACGTCTAGAAAAGCTTCGTATAGGGCTCCAGAAAGAAACAATCCAATTAATCAAGATGCACGATGAGGATCATATCCATACGATTTTTCACTTTTCGACAAATACAATCTGCTTCGTTATTCTAAGTGGTTATTCTATTTTGTGTAATGAAGAA…
Citrus sinensis	ON641345	0.5566	0.4605	53.6291	petA	ATGCAAATTAGAAATACCTTTTCTTCGTTAAAGGGAGAGATTACTCGATTCATTTCCGTATCCCTCATGATATATATAATAACTCGGGCATCAATTTCAAATGCATATCCCATTTTTGCGCAGCAGGGTTTTGAAAATCCACGAGAAGCAACTGGTCGTATTGTATGCGCCAATTGCCATTTAGCTAATAAGCCCGTGGATATTGAGGTTCCACAGGCGGTACTCCCCGATACTGTATTTGAAGCAGTTGTTAGAATTCCTTATGATATGCAACTAAAACAAGTTCTTGCTAATGGTAAAAAGGGGGCTTTGAATGTGGGGGCCGTTCTTATTTTACCAGAGGGGTTTGAATTAGCCCCCCCCGATCGTATTTCGCCCGAGATGAAAGAAAAGATAGGC…
Citrus sinensis	ON641345	0.5	0.3704	23.2532	psbJ	ATGGCCGATACTACTGGAAGGATTCCCCTTTGGATAATAGGAACTGTAACTGGTATTCCTGTGATCGGTTTAATAGGCATTTTCTTTTATGGTTCATATTCCGGATTAGGTTCGTCCTTGTAG
Citrus sinensis	ON641345	0.3125	0.4783	61	psbL	ATGACACAATCAAACCCAAACGAACAAAATGTTGAATTGAACCGTACCAGTCTCTACTGGGGGTTATTGCTCATTTTTGTACTTGCTGTTTTATTTTCCAATTACTTCTTCAATTAA
Citrus sinensis	ON641345	0.5333	0.56	53.3846	psbF	ATGACCATAGATCGAACCTATCCAATTTTTACAGTGCGATGGTTGGCTGTTCACGGACTAGCTGTACCTACCGTTTCTTTTTTGGGGTCAATATCAGCAATGCAGTTCATCCAACGCTAA
Citrus sinensis	ON641345	0.4333	0.3889	60.1481	psbE	ATGTCTGGAAGCACAGGAGAACGTTCTTTTGCTGATATTATTACCAGTATTCGATACTGGGTCATTCATAGCATTACTATACCTTCCCTATTCATTGCGGGTTGGTTATTCGTCAGCACGGGGTTAGCTTATGATGTGTTTGGAAGCCCCCGGCCAAACGAGTATTTTACAGAGAGCCGGCAAGGAATTCCATTAATAACCGGCCGTTTTGATTCTTTGGAACAACTCAATGAATTTAGTAGATCTTTTTAG
Citrus sinensis	ON641345	0.8333	0.3462	54.6842	petL	ATGCCTACTATAACTAGTTATTTTGGTTTTCTACTAGCGGCTTTAACTATAACCTCGGCTCTATTTATTGGTCTGAGTAAGATAGGACTTATTTGA
Citrus sinensis	ON641345	0.3333	0.4615	61	petG	ATGATTGAAGTCTTTCTATTTGGAATCGTCTTAGGTCTAATTCCTATTACTTTGGCTGGATTATTCGTAACCGCCTATTTACAATACAGACGTGGTGATCAGTTGGACCTTTGA
Citrus sinensis	ON641345	0.5294	0.6071	61	psaJ	ATGCGAGATCTAAAAACATATCTTTCCGTGGCACCGGTACTAAGTACTCTATGGTTCGGGTCTTTAGCAGGGTTATTGATAGAAATCAACCGTTTATTCCCCGACGCATTGACATTTCCTTTTTTTTCATTCTAG
Citrus sinensis	ON641345	0.6087	0.4318	35.1441	rpl33	ATGGCCAAGGGTAAAGAGGTCCGAGTAAGGGTTATTTTGGAATGTACTAGTTGTGTTCGAAACGGTGTTAATAAGGAATCAAGGGGTATTTCCAGATATATTACTCAAAAGAATCGACACAATACACCCAGTCGATTGGAATTGAGAAAATTCTGTCCCTATTGTTACAAGCATACACTTCATGGGGAGATAAAAAAATAG
Citrus sinensis	ON641345	0.6296	0.4933	47.8279	rps18	ATGGATAAAACCAAGCGACTCTTTCTTAAATCCAAGCGATCTTTTCGTAGGCGTTTGCCCCCGATCCAATCGGGGGATCGAATTGATTATAGAAACATGACTTTAATTAGTCGATTTCTTAGTGAACAAGGAAAAATATTATCTAGACGGGTGAATAGATTGACCTTAAAAGAACAACGATTAATTACTATTGCTATAAAACAAGCTCGTATTTTATCTTCGTTACCTTTTCTTAATAATGAGAAACAATTTGAAAGAAGTGGGTTGACCGCTAGACCTCCCGGTCTTAGAACCAGAAAAAAATAG
Citrus sinensis	ON641345	0.6452	0.4828	61	rpl20	ATGACCAGAATTAGACGAGGATATATAGCTCGGAGACGTAGAACAAAAATGCGTTTATTTGTATCAAGCTTTCGCGGGGCTCATTCACGACTTAGCCGAACAATTACTCAACAGAAAATAAGAGCTTTGGTTTCGGCTCATCGCGATAGAGATAGGAAAAAAAGAGATTTTCGTCGTTTGTGGATCACCCGAATAAATGCAGTAATTCGCGGAAATCTGGTATCCTATAGTTATAGTAGATTAATATACAATCTGTATAAGGCGCAGTTGGTTCTTAATCGTAAGATACTTGCACAAATAGCTATATCAAATAGGAATTGTCTTTATATGATTTCCAATGAGATTATAAAATAA
Citrus sinensis	ON641345	0.5135	0.4878	61	clpP1	ATGCCTATTGGTGTTCCAAAAGTACCTTATCGAAGTCCCGGGGACAAGCATCCATCTTGGGTTGACATATACAACCGACTTTATCGAGAAAGATTACTTTTTTTAGGTCAAATGGTTGAGAGCGATATCTCGAATCAACTTATTGGTATTATGGTATATCTCAGTATAGAGAACGAGACCAAGGATTTGTATTTATTTATCAACTCTCCTGGCGGATGGGTAATACCCGGGATAGCAATTTATGATACTATGCAATTTGTGCGACCCGATGTACAGACAATATGCATGGGATTGGCCGCCTCCATGGGGTCTTTTCTCCTGGCCGCCGGAGCAAGTACCAAACGTCTAGCATTCCCTCACGCTAGGGTCATGATCCATCAACCTATTGGCGCTTTTTAT…
Citrus sinensis	ON641345	0.5253	0.4245	50.4964	psbB	ATGGGTTTGCCTTGGTATCGTGTTCATACCGTCGTATTGAATGATCCCGGTCGTTTGATTGCTGTCCATATAATGCATACAGCCCTGGTTGCGGGTTGGGCCGGTTCAATGGCTCTATATGAATTAGCTGTTTTTGATCCCTCCGATCCAGTTCTTGATCCAATGTGGAGACAAGGCATGTTCGTTATACCCTTCATGACTCGTTTAGGAATAACCGATTCATGGGGTGGTTGGAGTATTACAGGGGGGACAGTAACGAATCCGGGTATTTGGAGTTACGAAGGTGTAGCGGGGGCACATATTGTGTTTTCCGGATTGTGCTTCTTGGCAGCTATCTGGCATTGGGTGTATTGGGATCTAGCAATATTTGTTGATGACCGTACAGGAAAACGTTCTTTG…
Citrus sinensis	ON641345	0.4545	0.56	43.1429	psbT	ATGGAAGCATTGGTTTATACATTCCTCTTAGTCTCGACTCTAGGGATCATTTTTTTCGCTATCTTTTTTCGAGAACCGCCTAAAGTTCCAACTAAAAAAACAAAATGA
Citrus sinensis	ON641345	0.4118	0.5556	61	pbf1	ATGGAAACAGCAACCCTAGTCGCCATCTCTATATCTGGGTTACTTGTAAGTTTTACTGGGTACGCCTTATATACTGCTTTTGGGCAACCCTCTCAACAACTAAGAGATCCATTCGAGGAACACGGGGACTAG
Citrus sinensis	ON641345	0.7917	0.44	61	psbH	ATGGCTACACAAACAGTTGAGGGTAGTTCTAGAGCTCGTCCAAAAAGAACTTCTGCAGGGGGGTTGTTGAAACCCTTGAATTCGGAATATGGTAAAGTAGCTCCTGGATGGGGAACTACTCCTTTGATGGGAGTCGCAATGGCTTTATTTGCGGTATTCCTATCTATTATTTTGGAGATTTATAATTCGTCCGTTTTACTGGACGGAATTTCACTGAATTAG
Citrus sinensis	ON641345	0.56	0.4326	56.7659	petB	ATGAGTAAAGTCTACGATTGGTTCGAAGAACGTCTCGAGATTCAGGCGATTGCAGATGATATAACTAGTAAATACGTTCCTCCTCATGTCAACATATTTTATTGTCTGGGAGGAATTACGCTCACTTGTTTTTTAGTACAAGTAGCTACAGGGTTTGCTATGACTTTTTACTACCGCCCGACCGTTACTGAGGCTTTTGCCTCTGTTCAATACATAATGACGGAAGTTAACTTCGGGTGGTTAATTCGATCGGTTCATCGATGGTCGGCAAGTATGATGGTCCTAATGACAATCCTGCACGTATTTCGCGTGTATCTCACCGGGGGTTTTAAAAAACCTCGCGAATTGACTTGGGTTACAGGTGTGGTTCTGGCTGTATTGACCGCATCTTTTGGTGTA…
Citrus sinensis	ON641345	0.5435	0.4957	44.2104	petD	ATGGGAGTAACAAAAAAACCTGACTTGAATGATCCTGTATTAAGGGCTAAGTTGGCTAAGGGTATGGGTCATAATTATTATGGAGAACCCGCATGGCCCAACGATCTTTTATATATTTTTCCAGTAGTAATTCTAGGTACTATTGCATGTACCGTAGGCTTAGCGGTTCTAGAACCATCAATGATTGGTGAACCCGCGGATCCATTTGCAACTCCTTTGGAAATCTTACCCGAATGGTATTTCTTTCCCGTATTTCAAATACTTCGTACAGTACCCAATAAGCTGTTGGGTGTTCTTTTAATGGTTTCAGTACCTACGGGATTATTAACAGTACCTTTTTTGGAAAATGTTAATAAATTCCAAAATCCATTTCGCCGTCCCGTAGCGACAACCGTCTTT…
Citrus sinensis	ON641345	0.5588	0.4846	55.3072	rpoA	ATGGTTCGAGAGAAAGTAAAAGTATCTACTCGGACACTACAGTGGAAGTGTGTTGAATCAAGAGCAGACAGTAAGCGTCTTTATTATGGGCGCTTTATTTTGTCTCCACTTATGAAAGGTCAAGCCGACACAATAGGCATTGCGATGCGAAGAGTTTTGCTTGGAGAAATAGAAGGAACATGTATTACACGCGCAAAATCTGAAAAAATTCCACACGAATATTCTACCATAGTGGGTATTCAAGAATCGGTACATGAAATTTTAATGAATTTGAAAGATATTGTATTGAGAAGTAATCTTTATGGAACTTGTGACGCGCTTATTTGTGTCAAAGGCCCGGGATATGTAACTGCTCAAGACATCCTCTTGCCGCCTTCTGTGGAAATCGTTGATAATACG…
Citrus sinensis	ON641345	0.5238	0.4948	61	rps11	ATGGCAAAATCTCCACCACGAAGTGGTTCACGTAGGCCGGGACGGATCGGTTCACGTAAAAGTGGACGTCGAATACCAAAGGGCGTTATTCATGTTCAAGCAAGTTTCAACAACACCATTGTGACTGTTACAGATGTCCGGGGTCGGGTAATTTCTTGGTCCTCGGCCGGTACTTGTGGATTCAGGGGTACAAGAAGAGGTACGCCTTTTGCTGCTCAAACCGCAGCAGGAAATGCTATTCGAGCAGTAGCGGATCAAGGTATGCAACGAGCAGAAGTCATGATAAAGGGTCCTGGTCTCGGAAGAGATGCGGCATTACGAGCTATTCGTAGAAGCGGTATCCTTTTAAATTTCGTACGGGATGTAACCCCTATGCCACACAATGGTTGCAGACCCCCT…
Citrus sinensis	ON641345	0.6364	0.6296	46.75	rpl36	ATGAAAATAAGGGCTTCAGTTCGTAAAATTTGTGAAAAATGTCGACTGATCCGCAGGAGGGGACGGATTATAGTAATTTGTTCCAACCCGAGACATAAACAAAGACAAGGATAA
Citrus sinensis	ON641345	0.5714	0.4444	57.2857	infA	ATGCGACCCGTTTTTCTACATCTACTCCCGGTGGCTAGAGGCAAAATTGAAGGAAGTCGTTATGATTCAGATTCAACTGGAGGATATAATAATAATATATAG
Citrus sinensis	ON641345	0.5106	0.5222	60.1718	rps8	ATGGGCAAGGACACTATTGCTGACATAATAACTTCTATACGAAATGCTGACATGAATAGAAAGGGAACGGTTCGAATAGCATCTACTAACATCACCGAAAACGTTGTTAAAATCCTTTTGCGAGAGGGTTTTATCGAAAACGCAAGGAAACTCGTGGAAAACAAAAACAAAAAAGAGTTTTTGGTTTTAACCCTACGACATCGAAGGAATAGGAAAGGGCCGTATAGACCCATTTTAAATTTAAAACGAATCAGTCGACCCGGTCTACGAATCTATTTTAACTATCGACGAATTCCTAGAATTTTAGATGGGATGGGGATTGTAATTCTCTCTACTTCTCGGGGTATAATGACAGACCGAGCGGCTCGACTGGAAAGAATCGGTGGAGAAATTTTGTGT…
Citrus sinensis	ON641345	0.4706	0.4831	53.9309	rpl14	ATGATTCAACCTCAAACCCATTTGAATGTAGCAGACAATAGCGGTGCCCGAGAATTGATGTGTATTCGAATCATAGGAGCCAGTAATCGTAGATATGCTCATATTGGTGACGTTATTGTTGCTGTGATCAAGGAAGCAGTACCCAATACGCCTCTAGAAAGATCAGAAGTGATCAGAGCTGTAATTGTACGTACTTGTAAAGAACTCAGACGTGATAACGGTATGATAATACGGTACGATGACAATGCTGCAGTTGTCATTGATCACGAAGGAAATCCAAAGGGAACTCGAGTTTTTGGTGCGATCGCCCGGGAATTGAGACAGTTGAATTTTACTAAAATAGTTTCATTAGCACCTGAAGTATTATAA
Citrus sinensis	ON641345	0.4884	0.5806	40.0273	rpl16	ATGCTTAGTCCCAAAAGAACAAGATTCCGTAAACAACATAGAGGAAGAATGAAAGGGATATCTTATCGAGGTAATCATATTTGTTTCGGCAGATATGCTCTTCAAGCACTTGAACCCGCTTGGATCACATCTAGACAAATCGAAGCGGGGCGCCGCGCAATGACACGAAATGTACGGCGCGGTGGAAAAATATGGGTACGTATCTTTCCAGACAAACCCGTTACACTAAGACCCACGGAAACCCGTATGGGGTCCGGTAAAGGATCCCCCGAATATTGGGTAGCCGTCGTTAAACCGGGTAGAATACTTTATGAAATGAGTGGAGTAGCTGAAAATATAGCTCGAAAGGCTATTTCAATAGCGGCGTCCAAAATGCCTATAAGAACTCAATTCATTATT…
Citrus sinensis	ON641345	0.4894	0.5838	43.8935	rps3	ATGGGACAAAAAATAAATCCACTAGGTTTCCGGCTTGGTACAACACAAAGTCATCATTCTCTTTGGTTTGCAAAACCAAAAAACTATTGCGAGGGTCTACAAGAAGATCAAAAAATACGAAACTTTATTAAGAATTATATAAAAAAAAATATCAGAATATCTTCCGGTGTTGAGGGAATTGCACGGATAGAGATTCAAAAAAGAATTGATCTAATTCAAGTTATAATCTATATAGGGTTCCCAAAATTATTACTAGAAAATAGACCGCGAAGAATTGAAGAATTACAGATGAATGTACAAAAAGAACTTAATTGTGTGAATCGAAAAATAAACATTGCTATTACACGAATTACAAATCCTTATGGACACCCCAATATTCTTGCCGAATTTATAGCCGGA…
Citrus sinensis	ON641345	0.5385	0.4828	37.7573	rpl22	ATGATAAGGATAATAAAGAAGAAGGTAGAAGTATCTGCTTTAGGTCAACATATATGTATGTCTGCTCACAAAGCCCGAAGGGTAATTGATCAGATTCGTGGACGTTCTTACGAGGAAACCCTTATGATACTCGAACTCATGCCTTATCGAGCATGTTATCCCATTTTAAAATTGGTTTATTCTGCAGCAGCAAATGGTATTCACAATCTGGGTTTCAACGAAGGAAGTTTATTCATTATTAAAGCCGAATAG
Citrus sinensis	ON641345	0.5417	0.4928	49.7899	rps19	GTGACACGTTCACTAAAAAAAAATCCTTTTGTAGCGAATCATTTATTAAGAAAAATCGATAAGCTTAATACAAAAGCGGAAAAAGAAATAATAATAACTTGGTCCCGGGCATCTACCATTATACCCACAATGGTCGGCCATACTATTGCTATCCATAATGGAAGGGAGCATTTGCCTATTTATATAACAGATCGTATGGTAGGACATAAATTGGGAGAATTTGCGCCCACTATCAATTTCCGTGGACATGCAAAAAATGATAATAGATCCCGTCGTTAA
Citrus sinensis	ON641345	0.4945	0.5054	55.29	rpl2	ATGGCGATACATTTATACAAAACTTCTACCCCGAGCACACGCAATGGAGCCGTAGACAGTCAAGTGAAATCCAATCCACGAAATAATTTGATCTATGGACAGCATCGTTGTGGTAAAGGTCGTAATGCCAGAGGAATCATTACCGCAGGGCATAGAGGGGGAGGTCATAAGCGTCTATACCGTAAAATCGATTTTCGACGGAATGAAAAAGACATATATGGTAGAATCGTAACCATAGAATACGACCCTAATCGAAATGCATACATTTGTCTCATACACTATGGGGATGGTGAGAAGAGATATATTTTACATCCCAGAGGGGCTATAATTGGAGATACCATTGTTTCTGGTACAGAAGTTCCTATAAAAATGGGAAATGCCCTACCTTTGACCGATATG…
Citrus sinensis	ON641345	0.5926	0.4925	61	rpl23	ATGGATGGAATCAAATATGCAGTATTTACAGACAAAAGTATTCGGTTATTGGGAAAAAATCAATATACTTCTAATGTCGAATCAGGATCAACTAGGACAGAAATAAAGCATTGGGTCGAACTCTTCTTTGGTGTCAAGGTAATTGCTATGAATAGTCATCAACTCCCCCGAAAGGGTAGAAGAATGGGACCTATTATGGCACATACAATGCATTACAGACGTATGATCATTACGCTTCAACCGGGTTATTCTATTCCACCTCTTAGAAAGAAAAGAACTTAA
Citrus sinensis	ON641345	0.5422	0.4416	53.6064	ycf2	ATGAAAGGACATCAATTCAAATCCTGGATTTTCGAATTGAGAGAGATATTGAGAGAGATCAAGAATTCTCACTATTTCTTAGATTCATGGACCCAATTCAATTCAGTGGGATCTTTCATTCACATTTTTTTCCACCAAGAACGTTTTATAAAACTCTTGGATCCACGAATTTGGAGTATCCTACTTTCACGCAATTCACAGGGTTCAACAAGCAATCGATATTTCACGATCAAGTGTGTAGTACTGTTTGTAGTAGCGATCCTTATATATCGTATTAACAATCGAAATATGGTCGAAAGAAAAAATCTCTATTTGACAGGGCTTCTTCCTATACCTATGAATTCCATTGGACCCAGAACTGATACATTGGAAGAATCTTTTGGGTCTTCCAATATCAAT…
Citrus sinensis	ON641345	0.5714	0.6875	46.5263	ycf15	ATGCTACTGCTGAAACATAGAAGAATTGAAATCTTAGATCAAAACACTATGTATGGATGGTATGAACTGCTTAAACAAGAATTCTTGAACAGCGAACCACCAGAGCTATTACTAACTACATCAAAAAATTTCCATTAA
Citrus sinensis	ON641345	0.4303	0.4538	50.2409	ndhB	ATGATCTGGCATGTACAGAATGAAAACTTCATTCTCGATTCTACGAGAATTTTTATGAAAGCCTTTCATTTGCTTCTCTTCGATGGAAGTTTTATTTTCCCAGAATGTATCCTAATTTTTGGCCTAATTCTTCTTCTGATGATCGATTCAACCTCTGATCAAAAAGATATACCTTGGTTATATTTCATCTCTTCAACAAGTTTAGTAATGAGCATAACGGCCCTATTGTTCCGCTGGAGAGAAGAACCTATGATTAGCTTTTCGGGAAATTTCCAAACGAACAATTTCAACGAAATCTTTCAATTTCTTATTTTACTATGTTCAACTCTATGTATTCCTCTATCCGTGGAGTACATTGAATGTACAGAAATGGCTATAACAGAGTTTCTGTTATTCGTA…
Citrus sinensis	ON641345	0.5135	0.5798	43.6563	rps7	ATGTCACGTCGAGGTACTACAGAAGAAAAAACTGCAAAATCCGATCCAATTTATCGTAATCGATTAGTTAACATGTTGGTTAACCGTATTCTGAAACACGGAAAAAAATCATTGGCTTATCAAATTATCTATCGAGCCTTGAAAAAGATTCAACAAAAGACAGAAAAAAATCCACTATCTGTTTTACGTCAAGCAATACGTGGAGTAACTCCCGATATAGCAGTAAAAGCAAGACGTGTAGGCGGATCGACTCATCAAGTTCCCATTGAAATAGGATCCGCACAAGGAAAAGCACTTGCCGTTCGTTGGTTATTAGGGGCATCCCGAAAACGTCCGGGTCGAAATATGGCTTTCAAATTAAGTTCCGAATTAGTGGATGCTGCCAAAGGGAGTGGCGAT…
Citrus sinensis	ON641345	0.5628	0.4147	46.4927	ndhF	ATGGAACATACATATCAATATTCCTGGATCATACCTTTAGTTCCACTTCCAGTCCCTATGTTAATAGGGGTGGGACTTCTATTTTTTCCGACCGCAACAAAAAATCTTCGCCGTATGTGGGCTTTTATTAGTATTTTATTGTTAAGTATAGTTATGATTTTTTCGATCGATCTATCTATTGAGCAAATAGATAGAACTTCGATCTATCAATCCCTAAGGACTTGGACCATCACTAGTGATTTGTCTTTCGAGTTCGGATACTTTATTGATCCACTTACTTCTATTATGTCAATATTAATCACTACAGTTGGAATTCTGGTTCTTATTTATAGTGACAATTATATGTCTCATGATCAAGGATATTTGAGATTTTTTGCTTATATGAGTTTTTTCAATGCT…
Citrus sinensis	ON641345	0.8571	0.4872	41.8373	rpl32	ATGGCAGTTCCAAAAAAACGTACTTCTATATTAAAAAAACGTATTCGTAAAAATCTTTGGAAAAAGGGGGGGTACTGGGCAGCGTTGAAGGCTTTTTCGTTAGCGAAATCCCTTGCTACTGGGAATTCAAAAAGTTTTTTTTGTACAACAAATAAATAA
Citrus sinensis	ON641345	0.5714	0.467	55.142	ccsA	ATGATATTTTCAACTTTGGAGCGTATATTAACGCATATATCCTTTTCGGTCGTTTCAATTGGAATTACAATTTATTTAATAACCTTCTTAGTCGATGAAATCAGAGGGCTATATGCTTCATCAGAAAGGGGGATGACAGCTACCGCTTTCTGTCTAACAGGATTATTAATCACCCGTTGGGTTTACTCGAGACATTTCCCATTAAGTGATTTATATGAATCATTAATCTTTCTTTCATGGAGTTTATCTATTATTCATAAGATTTTTGATTTTAAAAATAATCAAAATCATTTAAGCGCTATAACGGCACCAAGTGCTTTTTTTACCCAAGGCTTTGCGACTTCGGGTTTTTTAACCAAAATGCATCAATCCAGAATATTAGTACCCGCTCTCCAAGTC…
Citrus sinensis	ON641345	0.496	0.4961	52.4022	ndhD	ATGTTAGCGATGTACAGCGGTCAAATAGGATCATTTTCTTCTCGGGACCTTTTACTTTTTTTCATCATGTGGGAATTAGAATTAATTCCCGTTTATCTACTTCTGTCCGTGTGGGGTGGAAAGAAACGCCTTTATTCAGCCACAAAATTTATTTTGTACACGGCAGGAGGCTCCGTTTTTCTTTTAATAGGAGTTTTGGGTATCGGTTTATATGGTTCCAATGAACCAACATTAAATTTGGAAACATTAGTTAATCGGTCGTATCCTGTGGCACTGGAAATAATATTCTATATTGGATTTTTTATTGCTTTTGCTGTCAAATTGCCAATTATACCCTTTCATACGTGGTTACCAGACACCCACGGAGAGGCACATTACAGTACTTGTATGCTTCTAGCC…
Citrus sinensis	ON641345	0.5909	0.4833	53.6375	psaC	ATGTCACATTCAGTAAAGATTTATGATACATGTATAGGGTGTACTCAATGTGTACGAGCTTGCCCCACGGATGTATTAGAAATGATACCTTGGGACGGATGTAAAGCAAAGCAAATTGCTTCTGCTCCAAGAACAGAGGACTGTGTTGGTTGTAAGCGATGTGAATCCGCCTGTCCAACGGATTTCTTGAGTGTTCGAGTTTATTTATGGCATGAAACAACCCGAAGCATGGGTCTAGCTTATTGA
Citrus sinensis	ON641345	0.5758	0.3623	61	ndhE	ATGATGCTCGAGCATGTACTTGTTTTGAGTGCCTATTTATTTTCGATTGGCATCTATGGCTTGATTACGAGCCGAAATATGGTTCGGGCCTTGATGTGCCTTGAACTTATACTAAATGCAGTTAATATCAATTTTGTAACATTCTCTGATTTTTTTGATAGTCGACAATTAAAAGGAGATATTTTTTCAATTTTTGTTATAGCTATTGCAGCCGCTGAAGCAGCTATCGGATCAGCTATTGTTTCGTCAATTTATCGTAACAGAAAATCGACGCGTATCAATCAATCGACTTTGTTGAATAAGTAG
Citrus sinensis	ON641345	0.5	0.3953	60.7918	ndhG	ATGGATTTGCCTGGACCAATACACGATTTTATTTTAGTTTTTCTGGGATCGGGTCTTATATTAGGAGGTCTGGGAGTGGTATTATTTACCAACCCAATTTATTCTGCCTTTTCCTTGGGATTGGTTCTTGTTTGTATATCATTATTCTATATTCTATCAAATTCCCATTTTGTAGCTGCCGCGCAACTCCTTATTTACGTGGGAGCTGTAAATGTTTTAATCATATTTGCTGTAATGTTCATGAACGGCTCAGACTATTCCAAAGATTTTCAGTTGAATCTTTGGACTATTGGCGATGGTCTTACTTCTCTGGTTTGTACAAGTATTTTTTTTTCGCTAATCACTACTATTCTCGATACATCGTGGTACGGGATTATTTGGACTACACGAGCCAACCAG…
Citrus sinensis	ON641345	0.4865	0.4122	43.3049	ndhI	ATGTTCCCTATGGTAACCGGTTTCATGAATTATGGTCAACAAACAATACGAGCTGCAAGGTACATTGGTCAAAGTTTCATGATTACTTTATCCCAAGCAAATCGTTTACCTGTAACTATTCAATATCCTTATGAAAAATTAATCCCATCAGAGCGTTTTCGTGGTCGAATCCATTTTGAATTTGATAAATGTATTGCTTGTGAAGTATGCGTTCGGGTATGTCCTATAGATCTGCCTGTTGTTGATTGGAAATTTGAAACAGATATTCGAAAGAAACGATTGCTTAATTACAGTATTGATTTTGGAATTTGTATTTTTTGTGGTAACTGCGTTGAGTATTGTCCAACAAATTGTTTATCAATGACTGAAGAATATGAACTTGCGACTTACGACCGTCAC…
Citrus sinensis	ON641345	0.4778	0.4818	50.9977	ndhA	ATGATAATTGCTACACCCGAAGTACAAGATATCAATTCTTTTTCCCGATTGGAATCCCTACAAGAGGTCTATGGGATCCTATGGGTGCTTGCCCCTATTTCGATTTATGTATTGGCAATCACAATCGGTGTCCTAGTAATTGTGTGGTTAGAAAGAGAAATATCTGCAGGAATACAACAGCGTATTGGGCCTGAATACGCCAGCCCTTTGGGAATTCTTCAAGCTTTAGCCGATGGGACAAAACTCCTTTTCAAAGAAAACCTTCTTCCATCTAGAGGAAATAGTAGTTTATTCAGTATTGGTCCATCTATAGCAGTCATAGCAATTCTACTAAGTTATTCAGTAATTCCTTTTAGTTATAACCTTGTTTTAGCTGACCTCAATATCGGTATTTTTTTA…
Citrus sinensis	ON641345	0.5714	0.493	51.8969	ndhH	ATGAGTATACTAGCTACAGAAAAAGAAAAAGAATTTATGATAGTCAATATGGGACCTCACCACCCGTCAATGCATGGGGTTCTTCGTCTCATCGTTACTCTAGACGGTGAAGATGTTATTGACTGTGAACCAATATTGGGTTATTTACACAGAGGGATGGAAAAAATTGCGGAAAACCGAACAATTATACAATATCTGCCTTATGTAACCCGTTGGGATTATTTAGCTACTATGTTCACAGAAGCAATAACTGTAAATGGACCAGAACAGTTGGGAAATATTCGCGTACCTAAAAGGGCCAGCTATATCAGAGTAATTATGTTGGAGTTGAGTCGTATAGCTTCCCATCTGTTATGGCTTGGCCCTTTTATGGCAGATATTGGTGCACAGACTCCTTTC…
Citrus sinensis	ON641345	0.5385	0.6	55.3991	rps15	ATGGTAAAAAATGCATTCATCTCAGTTAGGGTTCAAGAAAAAAAAGAAAAAAACAGCGGATCGGTTGAATTTCAAGTATTTCGTTTCACCAACACGATCCGGAGACTTACTTCACATTTAGAATTGCACAGAAAAGACTATTCATCTCAAAGGGGTCTACGTAAAATTTTGGAAAAACGCCAACGTCTACTAGCTTATTTGTCAAAGAAAAATAGAGTACGTTATAAAGAATTAATTAGTAAGTTGAATATCCGGGAGTCAAAAAATCGTTAA
Citrus sinensis	ON641345	0.5349	0.5137	49.2923	ycf1	ATGATTTTTCAATCTTTTATACTAGGTAATCTAGTATCCTTATGCATGAAGATAATCAATTCGGTCGTTGTGGTCGGACTCTATTATGGATTTATGACCACATTCTCCATAGGGCCCTCTTATCTCTTCCTTCTCCGAGCTCGGGTTATGGAAGAAGGAGAAGAAGGAACCGAGAAGAAGGTATCAGCAACAACTGGTTTTATTGCGGGACAGCTCATGATGTTCATATCGATCTATTATGCGCCTCTGCATCTAGCATTGGGTAGACCGCATACAATAACTGTCCTAGCTCTACCGTATCTTTTGTTTCATTTCTTCTGGAACAATCCCAAACACTTTTTTGATTATGGATCTACTACCAGAAATTCAATGCGTAATCTTAGCATTCAATGTGTATTC…
Citrus sinensis	ON641345	0.5135	0.5798	43.6563	rps7	ATGTCACGTCGAGGTACTACAGAAGAAAAAACTGCAAAATCCGATCCAATTTATCGTAATCGATTAGTTAACATGTTGGTTAACCGTATTCTGAAACACGGAAAAAAATCATTGGCTTATCAAATTATCTATCGAGCCTTGAAAAAGATTCAACAAAAGACAGAAAAAAATCCACTATCTGTTTTACGTCAAGCAATACGTGGAGTAACTCCCGATATAGCAGTAAAAGCAAGACGTGTAGGCGGATCGACTCATCAAGTTCCCATTGAAATAGGATCCGCACAAGGAAAAGCACTTGCCGTTCGTTGGTTATTAGGGGCATCCCGAAAACGTCCGGGTCGAAATATGGCTTTCAAATTAAGTTCCGAATTAGTGGATGCTGCCAAAGGGAGTGGCGAT…
Citrus sinensis	ON641345	0.4303	0.4538	50.2409	ndhB	ATGATCTGGCATGTACAGAATGAAAACTTCATTCTCGATTCTACGAGAATTTTTATGAAAGCCTTTCATTTGCTTCTCTTCGATGGAAGTTTTATTTTCCCAGAATGTATCCTAATTTTTGGCCTAATTCTTCTTCTGATGATCGATTCAACCTCTGATCAAAAAGATATACCTTGGTTATATTTCATCTCTTCAACAAGTTTAGTAATGAGCATAACGGCCCTATTGTTCCGCTGGAGAGAAGAACCTATGATTAGCTTTTCGGGAAATTTCCAAACGAACAATTTCAACGAAATCTTTCAATTTCTTATTTTACTATGTTCAACTCTATGTATTCCTCTATCCGTGGAGTACATTGAATGTACAGAAATGGCTATAACAGAGTTTCTGTTATTCGTA…
Citrus sinensis	ON641345	0.5714	0.6875	46.5263	ycf15	ATGCTACTGCTGAAACATAGAAGAATTGAAATCTTAGATCAAAACACTATGTATGGATGGTATGAACTGCTTAAACAAGAATTCTTGAACAGCGAACCACCAGAGCTATTACTAACTACATCAAAAAATTTCCATTAA
Citrus sinensis	ON641345	0.5422	0.4416	53.6064	ycf2	ATGAAAGGACATCAATTCAAATCCTGGATTTTCGAATTGAGAGAGATATTGAGAGAGATCAAGAATTCTCACTATTTCTTAGATTCATGGACCCAATTCAATTCAGTGGGATCTTTCATTCACATTTTTTTCCACCAAGAACGTTTTATAAAACTCTTGGATCCACGAATTTGGAGTATCCTACTTTCACGCAATTCACAGGGTTCAACAAGCAATCGATATTTCACGATCAAGTGTGTAGTACTGTTTGTAGTAGCGATCCTTATATATCGTATTAACAATCGAAATATGGTCGAAAGAAAAAATCTCTATTTGACAGGGCTTCTTCCTATACCTATGAATTCCATTGGACCCAGAACTGATACATTGGAAGAATCTTTTGGGTCTTCCAATATCAAT…
Citrus sinensis	ON641345	0.5926	0.4925	61	rpl23	ATGGATGGAATCAAATATGCAGTATTTACAGACAAAAGTATTCGGTTATTGGGAAAAAATCAATATACTTCTAATGTCGAATCAGGATCAACTAGGACAGAAATAAAGCATTGGGTCGAACTCTTCTTTGGTGTCAAGGTAATTGCTATGAATAGTCATCAACTCCCCCGAAAGGGTAGAAGAATGGGACCTATTATGGCACATACAATGCATTACAGACGTATGATCATTACGCTTCAACCGGGTTATTCTATTCCACCTCTTAGAAAGAAAAGAACTTAA
Citrus sinensis	ON641345	0.4945	0.5054	55.29	rpl2	ATGGCGATACATTTATACAAAACTTCTACCCCGAGCACACGCAATGGAGCCGTAGACAGTCAAGTGAAATCCAATCCACGAAATAATTTGATCTATGGACAGCATCGTTGTGGTAAAGGTCGTAATGCCAGAGGAATCATTACCGCAGGGCATAGAGGGGGAGGTCATAAGCGTCTATACCGTAAAATCGATTTTCGACGGAATGAAAAAGACATATATGGTAGAATCGTAACCATAGAATACGACCCTAATCGAAATGCATACATTTGTCTCATACACTATGGGGATGGTGAGAAGAGATATATTTTACATCCCAGAGGGGCTATAATTGGAGATACCATTGTTTCTGGTACAGAAGTTCCTATAAAAATGGGAAATGCCCTACCTTTGACCGATATG…
Citrus sinensis	ON641345	0.5417	0.4928	49.7899	rps19	GTGACACGTTCACTAAAAAAAAATCCTTTTGTAGCGAATCATTTATTAAGAAAAATCGATAAGCTTAATACAAAAGCGGAAAAAGAAATAATAATAACTTGGTCCCGGGCATCTACCATTATACCCACAATGGTCGGCCATACTATTGCTATCCATAATGGAAGGGAGCATTTGCCTATTTATATAACAGATCGTATGGTAGGACATAAATTGGGAGAATTTGCGCCCACTATCAATTTCCGTGGACATGCAAAAAATGATAATAGATCCCGTCGTTAA
Clausena anisata	LC794893	0.35	0.3205	34.876	psbA	ATGACTGCAATTTTAGAGAGACGCGAAAGCGAACGCCTATGGGGTCGCTTCTGTAACTGGATAACTAGCACTGAAAACCGCCTTTACATTGGCTGGTTTGGTGTTTTGATGATCCCTACTTTATTGACCGCAACTTCTGTATTTATTATCGCCTTCATTGCTGCCCCTCCAGTAGATATTGATGGTATTCGTGAACCTGTTTCTGGATCTCTACTTTATGGAAACAATATTATTTCTGGTGCGATTATTCCTACTTCTGCAGCTATAGGTTTGCATTTTTACCCGATATGGGAAGCGGCATCCGTTGATGAATGGTTATACAATGGCGGTCCTTATGAGCTAATTGTTCTACACTTCTTACTTGGTGTAGCTTGTTACATGGGTCGTGAGTGGGAACTT…
Clausena anisata	LC794893	0.5482	0.3988	50.6069	matK	ATGGAGGAATTTCAAGTATATTTAGAACTAGATAGATCTCAACAACACGACTTCCTATACCCACTTCTTTTTCGGGAGTATATTTATGTACTTGCTCATGATCATGGTTTAAATAGCTCGATGATGTCATTGGAAAGTGGGTTTTATGACAATAAATCTAGTTCGCTAAGTGTGAAACGGTTAATTACTAGAATGTATCAACGGATTAATTTGAGTATTGCTGCTAATGATTCGAATCAAAATCCAATTTTTGGGCACAACAATAAGTTGTATTCTCAAATTATATCAGAGGTATTTGCTGCCGTGGTGGAAATTCCATTTTCCCTACGGTTGGTAGCTTTTTTAGAAGGGAAAGAAATTGAAAAATCGCCTAATTTCCAATCAATTCATTCAATATTT…
Clausena anisata	LC794893	0.55	0.4348	50.4318	rps16	ATGGTAAAACTTCGTTTGAAACGATGTGGTAGAAAGCAACGAGCCGTTTATCGAATCGTTGCAATTGATGGTCGATCCCGAAGAGAAGGAAGAGATCTTCGGAAAGTGGGTTTTTATGATCCGATAAATAATAAAACCCATTTAAATGTTCCTGCTATTCTATATTTCCTTGCCAAGGGCGCTCAACCTACAGGAACCGTTCATGATATTTCACAGAAAGCGGGGGTTTTTACAGAACTTAGTCTTAATCAAACGAAATTCTATTAA
Clausena anisata	LC794893	0.375	0.3261	34.9189	psbK	ATGCTTAATATCTTTAGTTTAATGTATATCTGTCTTAATTCTGCCCTTTATTCTAGTAGTTTTTTATTCGCCAAATTACCCGAGGCCTACGCTTTTTTGAATCCAATTGTAGATGTTATGCCAGTAATACCTGTTCTATTTTTTCTCTTAGCCTTTGTTTGGCAAGCTGCTGTAAGTTTTCGATGA
Clausena anisata	LC794893	0.2941	0.45	61	psbI	ATGCTTACTCTCAAACTCTTTGTTTACACCGTAGTGATATTCTTTGTTTCGCTCTTCATCTTCGGATTCCTGTCTAATGATCCAGGGCGTAATCCCGGACGCGAAGAATAA
Clausena anisata	LC794893	0.5203	0.4972	50.2195	atpA	ATGGCAACAATTAAAGCCGACGAAATTAGTAATATTATCCGTGAACGTATTGAGCAATATAATAGAGAAGTAAAGATTGTAAATATTGGGACCGTACTTCAAGTAGGCGACGGCATTGCCCGTATTTATGGTCTTGATGAAGTAATGGCAGGTGAATTAGTAGAATTTGAAGAGGGTACAATAGGCATTGCTCTGAATTTGGAATCAAATAATGTTGGTGTTGTTTTAATGGGTGACGGTTTAATGATACAAGAAGGAAGTTCTGTAAAAGCAACCGGAAAAATTGCTCAGATACCAGTAAGCGAGGCTTATTTAGGTCGTGTTATAAATGCCCTGGCTAAACCTATTGATGGTCGAGGTGAAATTTCAGCTTCTGAATCTAGATTAATTGAATCCCCT…
Clausena anisata	LC794893	0.5938	0.5124	54.7987	atpF	ATGAACAATGTAACCGATTCTTTCGTTTCTTTGGTTAACTGGCCATTCGCCGGGAGTTTCGGGCTTAATACCGATATTTTAGCAACAAATCCAATAAATCTAAGTGTAGTGCTTGGTGTATTGATCTTTTTTGGAAAGGGAGTGTTAAGTGATTTATTAGATAATCGCAAACTGAGGATTTTGAATAGTATTCGAAATTCAGAAGAACTGCAGGGAGGGGCCATTGAACGGCTGGAAAAAGCCCGGGCCCGGTTACGAAAAATCGAAATAGAAGCGGATCAGTTTCGAGTGAATGGATACTCTGAGATAGAACGAGAAAAATTCAATTTGATTAATTCAACTTATAAGACTTTGGAGCAATTAGAAAATTACAAAAATGAAACCATTCATTTTGAACAA…
Clausena anisata	LC794893	0.7917	0.3793	59.3551	atpH	ATGAATCCACTGATTTCTGCCGCTTCCGTTATTGCTGCTGGGTTGGCTGTTGGGCTTGCTTCTATTGGACCTGGAGTTGGTCAAGGTACTGCTGCGGGCCAGGCAGTAGAAGGGATCGCGAGACAGCCCGAGGCGGAGGGAAAAATACGAGGTACTTTATTGCTTAGTCTGGCTTTTATGGAAGCTTTAACAATTTATGGGCTGGTTGTAGCATTAGCACTTTTATTTGCGAATCCTTTTGTTTAA
Clausena anisata	LC794893	0.4189	0.431	48.9839	atpI	ATGAATGTTCTATCATGTTCCATGAACACACTAAAGGGGTTATACGATATATCCGGTGTGGAAGTAGGCCAACATTTCTATTGGCAAATAGGTGGGTTCCAAGTCCATGCCCAAGTACTTATTACTTCTTGGGTTGTAATTGCTATCTTATTAGGTTCAGCCTTTATAGCCGTTCGGAATCCACAAACCGTTCCGACTGCCACTCAAAATTTCTTCGAATATGTCCTTGAATTCATTCGAGACGTGAGCAAAACTCAGATTGGAGAAGAATATGGCCCATGGGTTCCCTTTATTGGAACTCTGTTTCTTTTTATTTTTGTTTCTAATTGGTCAGGTGCTCTTTTACCTTGGAAACTCATAGAGTTACCTCATGGGGAGTTAGCCGCACCCACGAATGAT…
Clausena anisata	LC794893	0.5811	0.4601	60.5877	rps2	ATGGCAAGAAGGTATTGGAACATACATTTGGAAGAGATGATGGAAGCAGGAATTCATTTTGGTCATGGTACTCGGAAATGGAATCCTAGAATGGCACCTTATATATCTGCAAAACATAAAGGTATTCATATTACAAATCTGACTCGAACTGCTCGGTTTTTATCAGAAGCTTGTGATTTAGTTTTTGATGCAGCAAGTAGGGGAAAACAATTCTTAATTGTTGGTACTAAAAATAAAGCGGCTGATTTAGTCGCGCGAGCTGCAATAAGGGCTCGGTGCCATTATGTTAATCAAAAATGGCTCGGCGGTATGTTAACCAATTGGTCCACTACAGAAACGCGACTTCACAAGTTCAGGGATTTGAGAACGGAACAAAAAGGGGGGAGACTCGACAGTCTT…
Clausena anisata	LC794893	0.5711	0.4656	52.542	rpoC2	ATGGCAGAACGTGTGAGTCTGGTCTTTCACAATAAAATGATAGATGGAACTGCCATTAAACGACTTATTAGCAGGTTAATAGATCATTTCGGAATGGCATATACATCACACATCCTGGATCAAGTAAAGACCCTGGGGTTCCAGCAAGCCACTGCTACATCTATTTCATTAGGCATTGATGATCTTTTAACGATACCTTCTAAGCGATGGCTAGTCCAAGATGCTGAACAACAAAGTTTTATTTTGGAAAAACACTATCATTATGGGAATGTACACGCGATAGAAAAACTACGGCAATCCATTGAGATATGGTATGCTACAAGTGAATATTTGCGACAAGAAATGAATCCTAATTTTAGGATGACTGAACCTTTTAATCCAGTCCATATAATGTCTTTT…
Clausena anisata	LC794893	0.575	0.4657	50.3472	rpoC1	ATGATTGATCGATATAAACATCAACAACTCCGAATTGGATCAGTTTCTCCTCAACAAATAAGCGCTTGGGCCAATAAAATCCTACCTAATGGAGAGATAATTGGAGAAGTGACAAAACCCTATACTTTTCATTACAAAACCAATAAACCGGAAAAAGATGGATTATTTTGTGAAAGAATTTTTGGGCCTATTAAAAGTGGAATTTGTGCTTGTGGAAATTATCGAATAATCGGAGATGAAAAAGAAGACCCGCAATTTTGTGAACAATGTGGGGTTGAATTTGTTGATTCTCGGATACGAAGATATCAAATGGGATACATAAAACTGGGATGCCCAGTAACCCACGTGTGGTATTTGAAACGTCTTCCTAGTTATATCGCGAATCTTTTAGATAAACCT…
Clausena anisata	LC794893	0.6073	0.4905	51.1597	rpoB	ATGCTGGGAGATGGAAATGTGGGAATGTCTACAATACCTGGGTTGAATCAGATCCAATTTGAAGGATTTTGTAGGTTCATTGATCAGGGCTTAACAGAAGAGCTTTATAAGTTTCCAAAAATTGAAGATACAGATCAAGAAATTGAATTTCAATTATTTGTGGAAACATATCAATTGGTAGAACCCTTGCTAAACGAAAGAGATGCTGTATATGAATCATTCACGTATTCTTCTGAATTATATGTATCCGCAGGATTAATTTGGAAAAGCCGAGGGGATATGCAGGAACAAACTATTTTTATTGGAAACATTCCTCTAATGAATTCTTTGGGAACTTCTATAGTAAACGGAATATCCAGAATTGTCATCAATCAAATATTGCAAAGTCCCGGTATCTAT…
Clausena anisata	LC794893	0.6	0.55	61	petN	ATGGATATAGTAAGTCTAGCTTGGGCTGCTTTAATGGTAGTCTTTACATTTTCCCTTTCGCTCGTAGTATGGGGAAGAAGTGGACTCTAG
Clausena anisata	LC794893	0.5556	0.4231	61	psbM	ATGGAAGTAAATATTCTCGCATTTATTGCTACTACATTGTTCGTTCTAGTTCCTACTGCGTTTTTGCTTATAATATACGTAAAAACGGTCAGTCAAAGTGATTAA
Clausena anisata	LC794893	0.44	0.3755	51.6916	psbD	ATGACTATAGCCCTTGGTAAATTTACCAAAGAGGAAAAGGATTTATTTGATATTATGGATGACTGGTTACGGAGGGACCGATTCGTTTTTGTAGGTTGGTCCGGCCTATTGCTCTTTCCTTGTGCCTATTTCGCTTTAGGGGGTTGGTTCACAGGCACAACCTTTGTAACTTCATGGTATACCCATGGATTAGCCAGTTCCTATTTGGAAGGCTGCAACTTCTTAACCGCCGCAGTTTCGACTCCTGCTAATAGTTTAGCGCATTCTTTGTTGTTACTATGGGGTCCTGAAGCACAAGGAGATTTTACTCGCTGGTGTCAATTAGGCGGTCTTTGGACTTTTGTTGCTCTCCACGGTGCTTTCGGACTAATAGGTTTCATGTTACGTCAATTTGAACTT…
Clausena anisata	LC794893	0.5034	0.3905	50.5872	psbC	GTGGAAACGCTCTTTAATGGAACTTTAGCTGTAGCAGGTCGTGACCAAGAAACCACCGGTTTCGCTTGGTGGGCCGGGAATGCCCGACTTATCAATTTATCCGGTAAACTGCTGGGCGCTCATGTAGCCCATGCTGGATTAATCGTATTCTGGGCCGGAGCAATGAACCTATTTGAAGTGGCTCATTTCGTACCAGAAAAGCCCATGTATGAACAAGGATTAATTTTACTTCCCCATCTAGCTACTCTAGGCTGGGGGGTAGGTCCTGGTGGGGAAGTTATAGACACCTTTCCATACTTTGTATCTGGAGTACTTCACTTAATTTCCTCTGCAGTATTGGGCTTTGGCGGTATTTATCATGCACTTCTGGGACCTGAGACTCTTGAAGAATCTTTTCCA…
Clausena anisata	LC794893	0.5263	0.3409	52.7462	psbZ	ATGACTATTGCTTTCCAATTGGCTGTTTTTGCATTAATTGCTACTTCATCAATCTTACTGATTAGTGTACCCGTTGTATTTGCTTCTCCGGATGGTTGGTCGAGTAACAAAAATGTCGTATTTTCTGGTACATCATTGTGGATTGGATTAGTCTTTCTGGTGGGTATCCTTAACTCTCTCATTTCTTAA
Clausena anisata	LC794893	0.6486	0.5781	46.869	rps14	ATGGCAAGGCAAAGTTTGATTCAGAGGGAAAAGAAAAGGCACAAATTGGAACAAAAATACCATTTGATTCGCCGATCCTCAAAAAAAGAAATAAACAAAGTTCCATCGTTGAGCGATAAATGGAAAATTCATGGAAAGTTACAATCCTCACCGCGTAATAGTGCACCTACCCGTCTTCATCGACGTTGTTTTTTGACCGGAAGGCCGAGAGCTACCTATCGAGACTTTGGACTATCCGGACACATACTTCGTGAAATGGTTCATGCGTGTTTGTTGCCGGGGGCAACAAGATCAAGTTGGTAA
Clausena anisata	LC794893	0.5608	0.3708	52.5654	psaB	ATGGCATTAAGATTTCCAAGGTTTAGCCAAGGCTTAGCTCAGGACCCCACTACTCGTCGTATTTGGTTTGGTATTGCTACCGCACATGACTTCGAGAGTCATGATGATATTACTGAGGAACGTCTTTATCAGAATATTTTTGCTTCTCACTTCGGGCAATTAGCAATAATTTTTCTGTGGACTTCCGGAAATCTCTTTCATGTAGCTTGGCAAGGAAATTTTGAGGCATGGGTACAGGACCCTTTACATGTAAGACCTATTGCTCATGCAATTTGGGATCCTCATTTTGGTCAACCGGCCGTGGAAGCTTTTTCTCGGGGAGGTGCTCTTGGCCCGGTGAATATCGCTTATTCTGGTGTTTATCAGTGGTGGTATACAATCGGTTTACGCACTAATGAG…
Clausena anisata	LC794893	0.5095	0.4283	52.0547	psaA	ATGATTATTCGTTCGCCGGAACCAGAAGTAAAAATTTTGGTAGATAGGGATCCCGTAAAAACTTCTTTCGAGGAATGGGCCAAACCGGGGCATTTCTCAAGAACCATAGCTAAGGGACCTGAGACTACCACTTGGATCTGGAACCTACATGCTGATGCTCACGACTTCGATAGCCATACCAGCGATTTGGAGGAGATCTCTCGAAAAGTATTTAGTGCCCATTTCGGACAACTCTCCATCATTTTTCTTTGGCTGAGCGGCATGTATTTCCACGGTGCTCGTTTTTCCAATTATGAAGCCTGGCTAAGCGATCCTACTCACATTGGACCTAGCGCACAGGTGGTTTGGCCAATAGTGGGCCAAGAAATATTGAACGGTGATGTGGGCGGGGGTTTCCGA…
Clausena anisata	LC794893	0.5926	0.4609	48.5662	pafI	ATGCCTAGATCGCGGATAAACGGAAATTTTATTGATAAGACCTTTTCGATTGTAGCCAATATATTATTACGAATAATTCCGACAACTGTAGGAGAAAAAGAGGCATTTACCTATTACAGAGATGGGATGTCAGCTCAATCTGAAGGCAATTATGCGGAAGCTTTACAGAATTATTATGAAGCTATGCGACTAGAAATTGATCCCTATGATCGAAGCTATATACTCTATAACATAGGCCTTATCCACACAAGTAACGGAGAACATACAAAAGCTTTAGAATATTATTTTCGGGCACTAGAACGAAATCCGTTCTTACCACAAGCTTTTAATAATATGGCTGTGATCTGTCATTACCGGGGGGAACAGGCCGTTCGACAGGGAGATTCTGAAATTGCGGAG…
Clausena anisata	LC794893	0.5	0.5	46.4938	rps4	ATGTCACGTTACCGAGGGCCTCGTTTCAAAAAAATACGCCGTCTGGGGGCTTTGCCGGGACTAACGAGTAAAAGGCCTAGAGCCGGAATCGATTTTAGAAACCAATCGCGCTCCGTAAAAAAATCTCAATATCGAATTCGTTTAGAAGAAAAACAAAAATTGCGTTTTCATTATGGTCTTACAGAACGACAATTACTTAAATATGTTCGTATCGCCGGAAAAGCCAAAGGGTCAACCGGTCTGGTTTTACTACAATTACTTGAAATGCGTTTGGATAACATTCTTTTTCGATTGGGTATGGCTTCAACTATTCCTCAAGCCCGCCAATTGGTTAACCATCGACATATTTTAGTTAATGGTCGTATAGTCGATATACCAAGTTATCGTTGCAAACCCCGA…
Clausena anisata	LC794893	0.64	0.4128	50.1966	ndhJ	ATGCAGGGTCGTTTGTCTGCTTGGCTGGTCAAGCATGGGCTAGTTCATAGATCTTTGGGCTTCGATTACCAAGGAATAGAAACTTTACAAATAAAGCCCGAGGATTGGCACTCTGTTGCTGTCATTTTGTATATATATGGTTACAATTATCTACGTTCCCAATGTGCCTATGATGTAGCACCGGGTGGACTGTTAGCCAGTGTGTATCATCTTACGCGAATAGAGTATGGTGTAGATCAACCAGAAGAGGTATGCATAAAAGTATTTGTTCCAAGGAGTAATCCTAAAATTCCATCGGTTTTCTGGGTTTGGAAAAGTGCGAATTTTCAAGAACGGGAATCTTATGATATGCTGGGAATCCTTTATGATAATCATCCACGACTGAAACGTATCTTAATG…
Clausena anisata	LC794893	0.5484	0.4518	54.3212	ndhK	ATGAATTCTATTGAATTTTCCTTACTTGATCGAACAACCCCAAATTCATTTATTTCAACTACATCAAACGATCTTTCAAATTGGTCAAGACTCTCCAGCTTATGGCCGCTTCTTTATGGTACCAGTTGTTGTTTCATTGAATTTGCTTCATTAATAGGCTCGCGGTTCGATTTTGACCGTTATGGGCTGGTACCAAGATCGAGCCCTAGACAGGCGGACCTAATTTTAACAGCTGGTACAGTAACAATGAAAATGGCTCCTTCTTTAGTGAGATTATATGAACAAATGCCTGAACCAAAATATGTTATTGCTATGGGAGCATGTACAATTACAGGGGGGATGTTCAGTACCGATTCGTATAGTACTGTTCGAGGAGTTGATAAGCTAATTCCCGTGGAT…
Clausena anisata	LC794893	0.6286	0.3953	47.6606	ndhC	ATGTTTCTGCTTTACAAATATGATATTTTCTGGGCATTTCTAATAATATCAAGTATTATTCCTATTTTGGCATTTCGAATTTCCGCAGTTTTAGCCCCGATTAACAAAGGGCCAGAGAAACTTTCTAGTTATGAATCGGGTATCGAACCAATGGGCGATGCTTGGTTACAATTTCGAATCCGGTATTATATGTTTGCTCTAGTTTTTGTTGTTTTTGATGTTGAAACCGTTTTTCTTTATCCATGGGCAATGAGTTTTGATGTATTGGGGGTACCCGTATTTATAGAAGCTTTCATTTTCATGCTTATTCTAATTGTTGGTTTAGTTTATGCGTGGCGCAAAGGAGCATTAGAGTGGTCTTAG
Clausena anisata	LC794893	0.6053	0.4792	57.0987	atpE	ATGACCTTAAATCTTTGTGTACTGACTCCTAATCGAATTGTTTGGGATTCAGAAGTGAAAGAAATCATTTTATCTACTAATAGTGGACAAATAGGCGTATTACCAAATCACGCGCCTATTGCCACAGCTGTAGATATAGGTATTTTAAGAATCCGCTTTAACGACCAATGGTTAACGATGGCTCTGATGGGTGGTTTTGCTAGAATAGGGAATAATGAGATCACTATTTTAGTAAATGATGCGGAGAAGAGTAGTGACATTGATCCCCAAGAAGCCCAGCAAACTCTTGAAATAGCAGAAGCTAATTTGAGGAAAGCTGAAAGCAAGAGACAAACAATTGAGGCAAATCTAGCTCTCAGACGAGCTAGGACACGAGTAGAGGTTATTAATGCGATTTCA…
Clausena anisata	LC794893	0.5159	0.4649	51.6123	atpB	ATGAGAATAAATCCTACTACTTCTGGTCCTGGGGTTTCCGCGCTTGCAAACAAAAACCTAGGACATATCGCTCAAATCATTGGTCCGGTACTGGATGTAGCCTTTCCCTCCGGCAAGATGCCTAATATTTACAATGCTCTGGTAGTTAAGGGTCGAGATACTGTCGATCAACCAATTAATGTGACTTGCGAGGTACAGCAATTATTAGGGAATAATCGAGTTAGAGCTGTAGCCATGAGTGCTACAGATGGTCTAACGAGGGGTATGGAAGTAATTGACACGGGAGCTCCTCTAAGTGTTCCAGTCGGCGGAGCGACTCTAGGACGAATTTTCAACGTGCTTGGAGAGCCTATTGATAATTTAGGTCCTGTAGATACTCGCACAACATCCCCTATTCAT…
Clausena anisata	LC794893	0.5127	0.4057	50.5077	rbcL	ATGTCACCACAAACAGAGACTAAAGCGAGTGTTGGATTCAAGGCCGGTGTTAAAGATTATAAATTGACTTATTATACTCCTGACTATGTAACCAAAGATACTGATATCTTGGCAGCATTCCGAGTAACTCCTCAGCCCGGAGTTCCACCCGAGGAAGCGGGGGCTGCGGTAGCTGCGGAATCTTCTACTGGTACCTGGACAACTGTGTGGACCGATGGGCTTACCAGCCTTGATCGTTACAAAGGGCGATGCTACAACATTGAGCCCGTTGCTGGAGAAGAGAATCAATATATATGTTATGTAGCTTACCCGTTAGACCTTTTTGAAGAAGGTTCTGTTACTAACATGTTTACTTCCATTGTGGGTAATGTATTTGGTTTCAAAGCACTGCGCGCTCTA…
Clausena anisata	LC794893	0.5203	0.3504	47.741	accD	ATGAAAAAATGGTGGTTCAATTCGATGTTATCTAAGGGTAAGGGGCAATTAGAATACAGGTGTTGGTTAAGTAAATCCATGGAGAGCCCTGGTCCTATTAAAAATCCCAGTGTAAGCGAGGAACTGATTAGAAATGATAAGGATAAAAACATTCATAGTTCGAGTGATAGTGACAGTTCAAGTTACAGCAAATTAGCTGGTGTCAGGGACATTCATAATTTCATCTCGGATGACACTTTTTTTGTTAAGGATAGTAATAGGGACAGTTATTCCATCCATTTTGATATTGAAAATAAAATTTTGGAACTAGACAATGCTCATTCTTTTCTGAGTGAACTAGAAAGTTCTTTTTATAGCTTTCGTAATTATAGTTCGAGGAATAATGGATCTAAAAGCGAT…
Clausena anisata	LC794893	0.6429	0.4167	61	psaI	ATGACAATTCTCAACAGCTTTCCCTCTATTTTTGTGCCTTTAGTGGGCCTAGTATTTCCGGCAATGGCAATGGCTTCGTTATTTCTTTATCTTGAAAAAAATAAGATTTTGTAA
Clausena anisata	LC794893	0.5441	0.4188	61	pafII	ATGAGTTGGCGATCAGAATATATATGGATAGAATTTATAGCGGGCTCTCGCAAACCAGGCAATTTCTTCTGGGCCTTTATCCTTTTTTTAGGCTCATTAGGATTCTTAGTGGTTGGAATTTCTAGTTATCTTGATAGGAATTTGCTATCTTTATTTCCGTCGCAGCAAATCCATTTTTTTCCACAAGGGATCGTGATGTCTTTCTACGGGATCGCGGGTCTCTTTATTAGTTCCTATTTGTGGTGCACAATTACATGGAATGTAGGTAGCGGTTATGATCGATTTGATACAAAAGAGGGATTAGTGTGTATTTTTCGTTGGGGATTTCCTGGAAAAAATCGCCGCATCTTTCTACGATTCCTTCTGAAAGATATTCAGTCCATCAGAATAGAAGTTAAA…
Clausena anisata	LC794893	0.473	0.4161	60.0966	cemA	ATGACAAAAAAGAACGCATCCATTCCCCTTAGATATCTTTCATCTATAGTATTTGTAGTATTTTTGCCCTGGTGGATCCCTCTATCATTTAATAAAAGTCTGGAATCCTGGGTTACTAATTGGTGGAATACTAGTCAATCCGAAACCTTTTTGAATGATATTCAAGAAAAGGCTATTCTAGAAAAATTCATAGAATTAGAGGAATTATTCCTCTTGGACGAAATGATAAAGGAATTTCCGGAAAGACGTCTAGAAAAGCTTCATATAGGGCTCCAGAAAGAAACAATCCAATTAATCAAGATGCACGATGAGGATCATATCCATACGATTTTTCACTTCTCAACAAATACAATCTGCTTCGTTATTCTAAGTGGTTATTCTATTCTGTGTAATGAAGAA…
Clausena anisata	LC794893	0.5524	0.4676	40.1757	petA	ATGCAAATTAGAAATACCTTTTCTTCGTTAAAGGGAGAGATTACTCGATTCATTTCCGTATCCCTCATGATATATATAATAACTCGGGCATCAATTTCAAATGCATATCCCATTTTTGCGCAGCAGGGTTTTGAAAATCCACGAGAAGCAACTGGTCGTATTGTATGCGCCAATTGCCATTTAGCTAATAAGCCCGTGGATATTGAGGTTCCACAGGCGGTACTCCCCGATACTGTATTTGAAGCAGTTGTTAGAATTCCTTATGATATGCAACTGAAACAAGTTCTTGCTAATGGTAAAAAGGGGGCTTTGAATGTGGGGGCCGTTCTTATTTTACCAGAGGGGTTTGAATTAGCCCCCCCCGATCGTATTTCGCCCGAGATGAAAGAAAAGATAGGC…
Clausena anisata	LC794893	0.5	0.3704	23.2532	psbJ	ATGGCCGATACTACTGGAAGGATTCCCCTTTGGATAATAGGAACTGTAACTGGTATTCCTGTGATCGGTTTAATAGGCATTTTCTTTTATGGTTCATATTCCGGATTAGGTTCGTCCTTGTAG
Clausena anisata	LC794893	0.2667	0.5	61	psbL	ATGACACAATCAAACCCAAACGAACAAAATGTTGAATTGAACCGTACCAGTCTCTACTGGGGGTTATTACTCATTTTTGTACTTGCTGTTTTATTTTCCAATTACTTCTTCAATTAA
Clausena anisata	LC794893	0.5714	0.5769	55.2727	psbF	ATGACCATAGATCGAACCTATCCAATTTTTACAGTGCGATGGTTGGCTGTTCACGGACTAGCTGTACCTACCGTTTCTTTTTTGGGGTCAATATCAGCAATGCAGTTCATCCAACGATAA
Clausena anisata	LC794893	0.4194	0.3962	60.1481	psbE	ATGTCTGGAAGCACAGGAGAACGTTCTTTTGCTGATATTATTACCAGTATTCGATACTGGGTCATTCATAGCATTACTATACCTTCCCTATTCATTGCGGGTTGGTTATTCGTCAGCACGGGGTTAGCTTACGATGTGTTTGGAAGCCCCCGGCCAAACGAGTATTTTACAGAGAGCCGGCAAGGAATTCCATTAATAACCGGCCGTTTTGATTCTTTGGAACAACTCAATGAATTTAGTAGATCTTTTTAG
Clausena anisata	LC794893	0.8333	0.3462	54.6842	petL	ATGCCTACTATAACTAGTTATTTTGGTTTTCTACTAGCGGCTTTAACTATAACCTCGGCTCTATTTATTGGTCTGAGTAAGATAGGACTTATTTGA
Clausena anisata	LC794893	0.3077	0.48	61	petG	ATGATTGAAGTCTTTCTATTTGGAATCGTCTTAGGTCTAATTCCTATTACTTTGGCTGGATTATTCGTAACCGCCTATTTACAATACAGACGTGGCGATCAGTTGGACCTTTGA
Clausena anisata	LC794893	0.5294	0.6071	61	psaJ	ATGCGAGATCTAAAAACATATCTTTCCGTGGCACCGGTACTAAGTACTCTATGGTTCGGGTCTTTAGCAGGGTTATTGATAGAAATCAACCGTTTATTCCCCGACGCATTGACATTTCCTTTTTTTTCATTCTAG
Clausena anisata	LC794893	0.6087	0.4318	35.4741	rpl33	ATGGCCAAGGGTAAAGAGGTCCGAGTAAGGGTTATTTTGGAATGTACTAGTTGTGTTCGAAACGGTGTTAATAAGGAATCAAGGGGTATTTCCAGATATATTACTCAAAAGAATCGACACAATACACCCAGTCGATTGGAATTGATAAAATTCTGTCCCTATTGTTACAAGCATACACTTCATGGGGAGATAAAAAAATAG
Clausena anisata	LC794893	0.6296	0.4933	47.8279	rps18	ATGGATAAAACCAAGCGACTCTTTCTTAAATCCAAGCGATCTTTTCGTAGGCGTTTGCCCCCGATCCAATCGGGGGATCGAATTGATTATAGAAACATGACTTTAATTAGTCGATTTCTTAGTGAACAAGGAAAAATATTATCTAGACGGGTGAATAGATTGACCTTAAAAGAACAACGATTAATTACTATTGCTATAAAACAAGCTCGTATTTTATCTTCGTTACCTTTTCTTAATAATGAGAAACAATTTGAAAGAAGTGGGTTGACCGCTAGACCTCCCGGTCTTCGAACCAGAAAAAAATAG
Clausena anisata	LC794893	0.6562	0.4767	61	rpl20	ATGACCAGAATTAGACGAGGATATATAGCTCGGAGACGTAGAACAAAAATGCGTTTATTTGTATCAAGCTTTCGCGGGGCTCATTCACGACTTAGCCGAACAATTACTCAACAGAAAATAAGAGCTTTGGTTTCGGCTCATCGCGATAGAGATAGGAAAAAAGGGGATTTTCGTCGTTTGTGGATCACCCGAATAAATGCAGTAATTCGCGAAATTCGGGTATCCTATAGTTATAGTAGATTAATATACAATCTGTATAAGGCGCAGTTGGTTCTTAATCGTAAGATACTTGCACAAATAGCTATATCAAATAGGAATTGTCTTTATATGATTTCCAATGAGATTATAAAATAA
Clausena anisata	LC794893	0.5068	0.4919	61	clpP1	ATGCCTATTGGTGTTCCAAAAGTACCTTATCGAAGTCCCGGGGACAAGCATCCATCTTGGGTTGACATATACAACCGCCTTTATCGAGAAAGATTACTTTTTTTAGGTCAAATGGTTGAGAGCGATATCTCGAATCAACTTATTGGTATTATGGTATATCTCAGTATAGAGAACGAGACCAAAGATTTGTATTTATTTATCAACTCTCCTGGCGGATGGGTAATACCCGGGATAGCAATTTATGATACTATGCAATTTGTGCGACCCGATGTACAGACAATATGCATGGGATTGGCCGCCTCCATGGGGTCTTTTCTCCTGGCCGCAGGAGCAAGTACCAAACGTCTAGCATTCCCTCACGCTAGGGTCATGATCCATCAACCTATTGGCGCTTTTTAT…
Clausena anisata	LC794893	0.537	0.415	51.0343	psbB	ATGGGTTTGCCTTGGTATCGTGTTCATACCGTCGTATTGAATGATCCCGGTCGTTTGATTGCTGTCCATATAATGCATACAGCCCTGGTTGCGGGTTGGGCCGGTTCAATGGCTCTATATGAATTAGCTGTTTTTGATCCCTCCGATCCAGTTCTTGATCCAATGTGGAGACAAGGCATGTTCGTTATACCCTTCATGACTCGTTTAGGAATAACCGATTCATGGGGTGGTTGGAGTATTACAGGGGGGACGGTAACGAATCCGGGTATTTGGAGTTACGAAGGTGTAGCGGGGGCACATATTGTGTTTTCCGGCTTGTGCTTCTTGGCAGCTATCTGGCATTGGGTGTATTGGGATCTAGCAATATTTGTTGATGACCGTACAGGAAAACGTTCTTTG…
Clausena anisata	LC794893	0.4545	0.56	43.1429	psbT	ATGGAAGCATTGGTTTATACATTCCTCTTAGTCTCGACTCTAGGGATCATTTTTTTCGCTATCTTTTTTCGAGAACCGCCTAAAGTTCCAACTAAAAAAACAAAATGA
Clausena anisata	LC794893	0.3889	0.5769	61	pbf1	ATGGAAACAGCAACCCTAGTCGCCATCTCTATATCTGGGTTACTTGTAAGTTTTACTGGGTACGCCTTATATACCGCTTTTGGGCAACCCTCTCAACAACTAAGAGATCCATTCGAGGAACACGGGGACTAG
Clausena anisata	LC794893	0.7917	0.4	61	psbH	ATGGCTGCACAAACTGTTGAGGGTAGTTCTCGAGCTCGTCCAAAAAGAACTTCTGCAGGGGGGTTGTTGAAACCCTTGAATTCGGAATATGGTAAAGTAGCTCCTGGATGGGGAACTACTCCTTTGATGGGTGTCGCAATGGCTTTATTTGCGGTATTCCTATGTATTATTTTGGAGATTTATAATTCGTCCGTTTTACTGGACGGAATTTCACTGAATTAG
Clausena anisata	LC794893	0.5676	0.4366	55.208	petB	ATGAGTAAAGTCTACGATTGGTTCGAAGAACGTCTCGAGATTCAGGCGATTGCAGATGATATAACTAGTAAATACGTTCCTCCTCATGTCAACATATTTTATTGTCTGGGAGGAATTACGCTCACTTGTTTTTTAGTACAAGTAGCTACAGGGTTTGCTATGACTTTTTACTACCGCCCGACCGTTACTGAGGCTTTTGCCTCCGTTCAATACATAATGACGGAAGTTAACTTCGGGTGGTTAATTCGATCGGTTCATCGATGGTCGGCAAGTATGATGGTCCTAATGATAATCCTGCACGTATTTCGTGTGTATCTCACGGGGGGTTTTAAAAAACCTCGCGAATTAACTTGGGTTACAGGTGTAGTTCTGGCTGTATTGACCGCATCTTTTGGTGTA…
Clausena anisata	LC794893	0.5	0.487	45.7894	petD	ATGGGAGTAACAAAAAAACCTGACTTGAATGATCCTGTATTAAGGGCTAAGTTGGCTAAGGGTATGGGTCATAATTATTATGGAGAACCCGCATGGCCCAACGATCTTTTATATATTTTTCCAGTAGTAATTCTAGGTACTATTGCATGTAACGTAGGCTTAGCGGTTCTAGAACCATCAATTATTGGTGAACCCGCAGATCCGTTTGCAACTCCTTTGGAAATCTTACCCGAATGGTATTTCTTTCCCGTATTTCAAATACTTCGTACAGTACCCAATAAGCTGTTGGGTGTTCTTTTAATGGTTTCAGTACCTACGGGATTATTAACAGTACCTTTTTTGGAAAATGTTAATAAATTCCAAAATCCATTTCGCCGCCCCGTCGCGACAACCGTCTTT…
Clausena anisata	LC794893	0.5534	0.4823	55.2809	rpoA	ATGGTTCGAGAGAAAGTAAAAGTATCTACTCGGACACTGCAGTGGAAGTGTGTTGAATCAAGAGCAGACAGTAAGCGTCTTTATTATGGGCGCTTTATTTTGTCTCCACTTATGAAAGGTCAAGCCGACACAATAGGCATTGCGATGCGAAGAGTTTTGCTTGGAGAAATAGAAGGAACATGTATTACACGCGCAAAATCTGAGAAAATCCCACACGAATATTCTACCATAGTGGGTATTCAAGAATCGGTACATGAAATTTTAATGAATTTGAAAGATATTGTATTGAGAAGTAATCTTTATGGAACTTGTGACGCTCTTATTTGTGTCAAAGGCCCGGGATATGTAACTGCTCAAGACATCCTCTTGCCGCCTTCTGTGGAAATCGTTGATAATACG…
Clausena anisata	LC794893	0.5238	0.4948	61	rps11	ATGGCAAAATCTCCACCAAGAAGTGGTTCACGTAGGCCGGGACGGATTGGTTCACGTAAAAGTGGACGTCGAATACCAAAGGGCATTATTCATGTTCAAGCAAGTTTCAACAACACCATTGTGACTGTTACAGATGTCCGGGGTCGGGTAATTTCTTGGTCCTCGGCCGGTACTTGTGGATTCAGGGGTACAAGAAGAGGTACGCCTTTTGCTGCTCAAACCGCAGCAGGAAATGCTATTCGAGCAGTAGCGGATCAAGGCATGCAACGAGCAGAAGTCATGATAAAGGGTCCTGGTCTCGGAAGAGATGCGGCATTACGAGCTATTCGTAGAAGCGGTATCCTTTTAAATTTCGTACGGGATGTAACCCCTATGCCACACAATGGTTGCAGACCCCCT…
Clausena anisata	LC794893	0.6364	0.6296	46.75	rpl36	ATGAAAATAAGGGCTTCAGTTCGTAAAATTTGTGAAAAATGTCGACTGATCCGCAGGAGGGGACGGATTATAGTAATTTGTTCCAACCCGAGACATAAACAAAGACAAGGATAA
Clausena anisata	LC794893	0.5238	0.5269	43.0261	rps8	ATGGGCAAGGACACTATTGCTGACATAATAACTTATATACGAAATGCTGACATGAATAGAAAGGGAACGGTTCGAATAGCATCTACTAACATCACCGAAAACGTTGTTAAAATACTTTTGCGAGAGGGTTTTATAGAAAACGCAAGGAAACTCGTTGAAAACAAAAAAGAGTTTTTGGTTTTAACCCTACAACATCGAAGGAATAGGAAAGGGCCGTATAGACCCATTTTAAATTTAAAACGAATCAGTCGACCCGGTCTACGAATCTATTTTAACTATCGACGAATTCCTAGAATTTTAGATGGGATGGGGATTGTAATTCTCTCTACTTCTCGGGGTATAATGACAGACCGAGCGGCTCGACTAGAAAGAATCGGTGGAGAAATTTTGTGTTATATA…
Clausena anisata	LC794893	0.4848	0.5	51.567	rpl14	ATGATTCAACCTCAAACCCATTTGAATGTAGCAGACAATAGCGGTGCCCGAGAATTGATGTGTATTCGAATCATAGGAGCCAGTAATCGTAGATATGCTCATATTGGTGACGTTATTGTTGCTGTGATCAAGGAAGCAGTACCCAATACGCCTCTAGAAAGATCAGAAGTGATCAGAGCAGTAATTGTACGTACTTGTAAAGAACTCAGACGTGATAACGGTATGATAATACGGTACGATGACAATGCTGCAGTTGTCATTGATCAAGAAGGAAATCCAAAGGGAACTCGAGTTTTTGGTGCGATCGCCCGGGAATTGAGACAGTTGAATTTTACTAAAATAGTTTCATTAGCACCTGAAGTATTATAA
Clausena anisata	LC794893	0.5122	0.5895	41.287	rpl16	ATGCTTAGTCCCAAAAGAACAAGATTCCGTAAACAACATAGAGGAAGAATGAAAGGGATATCTTATCGAGGTAATCATATTTGTTTCGGCAGATATGCTCTTCAAGCACTTGAACCCGCTTGGATCACATCTAGACAAATCGAAGCGGGGCGCCGAGCAATGACACGAAATGTACGGCGCGGTGGAAAAATATGGGTACGTATCTTTCCAGACAAACCAGTTACAGTAAGACCCACGGAAACCCGTATGGGGTCCGGTAAAGGATCCCCCGAATATTGGGTAGCCGTCGTTAAACCGGGTAGAATACTTTATGAAATGAGTGGAGTAGCTGAAAATATAGCTCGAAAGGCTATTTCAATAGCGGCGTCCAAAATGCCTATAAGAACTCAATTCATTATT…
Clausena anisata	LC794893	0.48	0.5882	44.0828	rps3	ATGGGACAAAAAATAAATCCACTGGGTTTCCGGCTTGGTACAACACAAAGTCATCATTCTCTTTGGTTTGCAAAACCAAAAAACTATTGCGAGGGTCTACAAGAAGATCAAAAAATACGAAACTTTATTAAGAATTATGTACAAAAAAATATGAGAATATCCTCCGGTGTTGAGGGAATTGCACGGATAGAGATTAAAAAAAGAATTGATCTAATTCAAATTATAATCTATATAGGGTTCCCAAAATTATTACTAGAAAATAGACCGCGAAGAATTGAAGAATTACAGATGAATGTACAAAAAGAACTTAATTGTGTGAATCGAAAAATAAACATTGCTATTACAAGAATTGCAAATCCTTACGGACACCCCAATATTCTTGCCGAATTTATAGCCGGC…
Clausena anisata	LC794893	0.4872	0.4891	48.6188	rpl22	ATGATAAGGATAATAAAGAAGAAGGTAGAAGTATCTGCTTTAGGTCAACATATATGTATGTCTGCTCACAAAGCCCGAAGGATAATTGATCAGATTCGTGGACGTTCTTACGAGGAAACCCTTATGATACTCGAACTCATGCCTTATCGAGCATGTTATCCCATTTTTAAATTGGTTTATTCTGCAGCAGCAAATGGTATTCACAATCTGGGTTTCAACGAAGGAAACGAGGGTCCTATTGCGAAAAGATTAAAACCTCGAGCTCGAGGGCGGAGTTATCTGATCAAAAAACCCACTTGTCATATAACTATTGTTTTAAAAGATATATCCTTAGCTGAATATGAATATAGAGACTATCTCGATCTCGAGTGCTCAAAAAACAAAAAACACTAA
Clausena anisata	LC794893	0.5417	0.4928	49.7899	rps19	GTGACACGTTCACTAAAAAAAAATCCTTTTGTAGCGAATCATTTATTAAGAAAAATCGATAAGCTTAATACAAAAGCGGAAAAAGAAATAATAATAACTTGGTCCCGGGCATCTACCATTATACCCACAATGGTCGGCCATACTATTGCTATCCATAATGGAAGGGAGCATTTGCCTATTTATATAACAGATCGTATGGTAGGACATAAATTGGGAGAATTTGCGCCCACTATCAATTTCCGTGGACATGCAAAAAATGATAATAGATCCCGTCGTTAA
Clausena anisata	LC794893	0.5	0.5081	55.0925	rpl2	ATGGCGATACATTTATACAAAACTTCTACCCCGAGCACACGCAATGGAGCCGTAGACAGTCAAGTGAAATCCAATCCACGAAATAATTTGATCTATGGACAGCATCGTTGTGGTAAAGGTCGTAATGCCAGAGGAATCATTACCGCAGGGCATAGAGGGGGAGGTCATAAGCGTCTATACCGTAAAATAGATTTTCGACGGAATGAAAAAGACATATATGGTAGAATCGTAACCATAGAATACGACCCTAATCGAAATGCATACATTTGTCTCATACACTATGGGGATGGTGAGAAGAGATATATTTTACATCCCAGAGGGGCTATAATTGGAGATACCATTGTTTCTGGTACAGAAGTTCCTATAAAAATGGGAAATGCCCTACCTTTGACCGATATG…
Clausena anisata	LC794893	0.6071	0.5	61	rpl23	ATGGATGGAATCAAATATGCAGTATTTACAGACAAAAGTATTCGGTTATTGGGGAAAAATCAATATACTTCTAATGTCGAATCAGGATCAACTAGGACAGAAATAAAGCATTGGGTCGAACTCTTCTTTGGTGTCAAGGTAATAGCTATGAATAGTCATCAACTCCCCCGAAAGGGTAGAAGAATGGGACCTATTATGGCACATACAATGCATTACAGACGTATGATCATTACGCTTCAACCGGGTTATTCTATTCCACCTCTTAGAAAGAAAAGAACTTAA
Clausena anisata	LC794893	0.538	0.4394	53.7254	ycf2	ATGAAAGGACATCAATTCAAATCCTGGATTTTCGAATTGAGAGAGATATTGAGAGAGATCAAGAATTCTCACTATTTCTTAGATTCATGGACCCAATTCAATTCAGTGGGATCTTTCATTCACATTTTTTTCCACCAAGAACGTTTTATAAAACTCTTGGACCCACGAATTTGGAGTATCCTACTTTCACGCAATTCACAGGGTTCAACAAGCAATCGATATTTCACGATCAAGTGTGTAGTACTGTTTGTAGTAGCGATCCTTATATATCGTATTAACAATCGAAATATGGTCGAAAGAAAAAATCTCTATTTGACAGGGCTTCTTCCTATACCTATGAATTCCATTGGACCCAGAACTGATACATTGGAAGAATCTTTTGGGTCTTCCAATATCAAT…
Clausena anisata	LC794893	0.5714	0.6875	46.5263	ycf15	ATGCTACTGCTGAAACATAGAAGAATTGAAATCTTAGATCAAAACACTATGTATGGATGGTATGAACTGCTTAAACAAGAATTCTTGAACAGCGAACCACCAGAGCTATTACTAACTACATCAAAAAATTTCCATTAA
Clausena anisata	LC794893	0.4303	0.4538	50.2409	ndhB	ATGATCTGGCATGTACAGAATGAAAACTTCATTCTCGATTCTACGAGAATTTTTATGAAAGCCTTTCATTTGCTTCTCTTCGATGGAAGTTTTATTTTCCCAGAATGTATCCTAATTTTTGGCCTAATTCTTCTTCTGATGATCGATTCAACCTCTGATCAAAAAGATATACCTTGGTTATATTTCATCTCTTCAACAAGTTTAGTAATGAGCATAACGGCCCTATTGTTCCGCTGGAGAGAAGAACCTATGATTAGCTTTTCGGGAAATTTCCAAACGAACAATTTCAACGAAATCTTTCAATTTCTTATTTTACTATGTTCAACTCTATGTATTCCTCTATCCGTGGAGTACATTGAATGTACAGAAATGGCTATAACAGAGTTTCTGTTATTCGTA…
Clausena anisata	LC794893	0.5135	0.5798	43.6563	rps7	ATGTCACGTCGAGGTACTACAGAAGAAAAAACTGCAAAATCCGATCCAATTTATCGTAATCGATTAGTTAACATGTTGGTTAACCGTATTCTGAAACACGGAAAAAAATCATTGGCTTATCAAATTATCTATCGAGCCTTGAAAAAGATTCAACAAAAGACAGAAAAAAATCCACTATCTGTTTTACGTCAAGCAATACGTGGAGTAACTCCCGATATAGCAGTAAAAGCAAGACGTGTAGGCGGATCGACTCATCAAGTTCCCATTGAAATAGGATCCGCACAAGGAAAAGCACTTGCCGTTCGTTGGTTATTAGGGGCATCCCGAAAACGTCCGGGTCGAAATATGGCTTTCAAATTAAGTTCCGAATTAGTGGATGCTGCCAAAGGGAGTGGCGAT…
Clausena anisata	LC794893	0.5205	0.4754	51.1295	ycf68	ATGGCGTACTTCTCCTGTTCGAACCGGGGGTTTGAAAACAAACTCCTCCTCAGGAGGATAGATGGGGCGATTCAGGTGAGATCCAATGTAGATCCAACTTTCTATTCACTCGTGGGATCCGGGCGGTCCGGGGGGGACCACCACGGCTCCTCTCTTCTCGATAATCCATACATCCCTTATCAGTGTATGGACAGCTATCTCTCGAGCACAGGTTTAGGTTCGGCCTCAATGGGAAAAAAAATGGAGCACCTAACAACGTATCTTCACAGACCAAGAACTACGAGATCGCCCCTTTCATTTCATTCTGGGGTGACGGAGGGATCGTACCATTCGAGCCTTTTTTTTTTTTTCATGCTTTTCCCGGAGGTCTGGAGAAAGCTGCAATCAATAGGATTTTCC…
Clausena anisata	LC794893	0.65	0.3125	61	orf56	TTGTGGTTCCGGAGGATCCAGCTACAGGAGAACCAGGAACGGAGAGCTTTCCCCCCTTTTCCGCCCCCACTCTTTGGTCTTAAGAATGCTGGTTTTAAGAATGAGTAA
Clausena anisata	LC794893	0.5344	0.5101	56.7221	ycf1	ATGATTTTTCAATCTTTTATACTAGGTAATCTAGTATCCTTATGCATGAAGATAATCAATTCGGTCGTTGTGGTCGGACTCTATTATGGATTTATGACCACATTCTCCATAGGGCCCTCTTATCTCTTCCTTCTCCGAGCTCGGGTTATGGAAGAAGGAGAAGAAGGAACCGAGAAGAAGGTATCAGCAACAACAGGTTTTATTGCGGGACAGCTCATGATGTTCATATCGATCTATTATGCGCCTCTGCATCTAGCATTGGGTAGACCGCATACAATAACTGTCCTAGCTCTACCGTATCTTTTGTTTCATTTCTTCTGGAACAATCCCAAACACTTTTTTGATTATGGATCTACTACCAGAAATTCAATGCGTAATCTTAGCATTCAATGTGTATTC…
Clausena anisata	LC794893	0.5619	0.3993	45.9617	ndhF	ATGGAACATACATATCAATATTCCTGGCTCATACCTTTAGTTCCACTTCCAGTCCCTATGTTAATAGGGGTGGGACTTCTCTTTTTTCCGACCGCAACAAAACATCTTCGCCGTATGTGGGCTTTTATTAGTATTTTATTGTTAAGTATAGTTATGATTTTTTCGATCGATCTATCTATTGAGCAAATGGATAGAACTTCGATCTATCAATCCCTAAGGTCTTGGACCATCGCTAGTGATTTTTGTTTCGAGTTCGGATACTTTATTGATCCACTTACTTCTATTATGTTAATATTAATCACTACAGTTGGAATTCTGGTTCTTATCTATAGTGACAATTATATGTCTCATGATCAAGGATATTTGAGATTTTTTGCTTATATGAGTTTTTTCAATGCT…
Clausena anisata	LC794893	0.9333	0.5116	43.5345	rpl32	ATGGCAGTTCCAAAAAAACGTACTTCTATATTAAAAAAACATATTCGTAAAAATATTTGGAAAAAGGGGGGGTATTGGGCAGCGTTTAAGGCTTTTTCGTTAGCGAAATCCCTTGCTACTGGGAATTCAAAAAGTTTTTTTGTACAACAAATAAATAAGAAAAGGTTGAAATAA
Clausena anisata	LC794893	0.5699	0.4667	55.422	ccsA	ATGATCTTTTCAACTTTGGAGCGTATATTAACGCATATATCCTTTTCGGTCGTTTCAATTGGAATTACAATTTATTTAATAACCTTCTTAGTTGATGAAATCAGAGGGCTATATGCTTCATCAGAAAGGGGGATGACAGCTACCGCTTTCTGTCTAACAGGATTATTAATCACCCGTTGGGTTTACTCGAGACATTTCCCATTAAGTGATTTATATGAATCATTAATCTTTCTTTCATGGAGTTTATCTATTATTCATAGGATTTTTGATTTTAAAAATAATCAAAATCATTTAAGCGCTATAACGGCACCAAGTGCTTTTTTTACCCAAGGCTTTGCGACTTCGGGTTTTTTAACCAAAATGCATCAATCCGGAATATTAGTACCCGCTCTCCAAGTC…
Clausena anisata	LC794893	0.4939	0.4734	51.6923	ndhD	ACGAATTATTTTCCTTGGTTAACACTAATTGTAGTTTTTCCGATAGCCGCGGGTTCTTTAATTTTTTTTCTCCCTCATAGAGGAAATAAGGTGACTAGAGGATATACAATATATATATGTGTCTTAGAACTCCTTCTAACGACCTATGGAATTCTGTATAATTTCCAATTGGACGATCCATTAATTCAGCTGGCAGAGGATTATAAATGGATCACTTTTTTTGAGTTTGACTGGCGATTGGGAATAGATGGACTTTCCATAGGACCCATTTTACTGACGGGATTTATCACCACTTTAGCTACTTTAGCGGCTCGGCCAGTTACTCGGAATTCCCGACTATTCCACTTCCTGATGTTAGCGATGTACAGCGGTCAAATAGGATCATTTTCTTCTCGGGAC…
Clausena anisata	LC794893	0.5652	0.4915	54.5317	psaC	ATGTCACATTCAGTAAAGATTTATGATACATGTATAGGGTGTACTCAATGTGTACGAGCTTGCCCCACGGATGTATTAGAAATGATACCTTGGGACGGATGTAAAGCAAAGCAAATTGCTTCTGCTCCAAGAACAGAGGACTGTGTTGGTTGTAAGCGATGCGAATCCGCCTGTCCAACGGATTTCTTGAGTGTTCGAGTTTATTTATGGCATGAAACAACCCGAAGCATGGGTCTAGCTTATTGA
Clausena anisata	LC794893	0.5938	0.3571	61	ndhE	ATGATGCTCGAGCATGTACTTGTTTTGAGTGCCTATTTATTTTCGATTGGTCTCTATGGCTTGATTACGAGCCGAAATATGGTTCGGGCCCTGATGTGTCTTGAACTTATACTAAATGCAGTTAATATCAATTTCGTAACATTCTCTGATTTTTTTGATAGTCGACAATTAAAAGGAGATATTTTTGCAATTTTTGTTATAGCTATTGCAGCCGCTGAAGCAGCTATCGGATCAGCTATTGTTTCGTCAATTTATCGTAACAGAAAATCGACGCGTATCAATCAATCGACTTTGTTGAATAAGTAG
Clausena anisata	LC794893	0.5	0.3876	61	ndhG	ATGGATTTGCCTGGACCAATACACGATTTTCTTTTAGTTTTTCTGGGATCGGGTCTTATATTAGGAGGTCTGGGAGTGGTATTATTTACCAACCCAATTTATTCTGCCTTTTCCTTGGGATTGGTTCTTGTTTGTATATCATTATTCTATATTCTATCAAATTCCCATTTTGTAGCTGCCGCGCAACTCCTTATTTACGTGGGAGCTGTAAATGTTTTAATCATATTTGCTGTAATGTTCATGAGCGGCTCAGACTATTCTAAAGATTTTCAGTTGAATCTTTGGACTATTGGCGATGGTCTTACTTCCCTGGTTTGTACAAGTATTTTTTTTTCCCTAATCACTACTATTCTAGATACTTCGTGGTACGGGATTATTTGGACTACACGAGCCAACCAG…
Clausena anisata	LC794893	0.5	0.4154	59.5547	ndhI	ATGTTCCCTATGGTAACCGGTTTCATGAATTATGGTCAACAAACAATACGAGCTGCAAGGTACATTGGGCAAAGTTTCATGATTACTTTATCCCAAGCAAATCGTTTACCTGTAACTATTCAATATCCTTATGAAAAATTAATCACATCGGAGCGTTTTCGCGGTCGAATACATTTTGAATTTGATAAATGTATTGCTTGTGAAGTATGCGTTCGGGTATGTCCTATAGATCTGCCTGTTGTTGATTGGAAATTTGAAACAGATATTCGAAAGAAACGATTGCTTAATTACAGTATTGATTTTGGAATTTGTATTTTTTGTGGTAACTGCGTTGAGTATTGTCCAACAAATTGTTTATCAATGACTGAAGAATATGAACTTGCTACTTACGACCGTCAC…
Clausena anisata	LC794893	0.4674	0.4853	50.2337	ndhA	ATGATAATTGCTACACCCGAAGTACAAGATATCAATTCTTTTTCCAGATTGGAATCCCTACAAGAGGTCTATGGGATCATATGGGTGCTTGCCCCTATTTCGATTTATGTATTGGCAATCACAATAGGCGTCCTAGTAATTGTGTGGTTAGAAAGAGAAATATCTGCAGGAATACAACAGCGTATTGGGCCTGAATACGCCAGCCCTTTGGGAATTCTTCAAGCTTTAGCCGATGGGACAAAACTCCTTTTCAAAGAAAACCTTCTTCCATCTAGAGGAAATAGTAGTTTATTCAGTATTGGTCCATCTATAGCAGTCATAGCAATTCTACTAAGTTATTCAGTAATTCCTTTTAGTTATAACCTTGTTTTAGCTGACCTCAATATCGGTATTTTTTTA…
Clausena anisata	LC794893	0.5872	0.4912	50.2051	ndhH	ATGAGTATACTAGCTACAGAAAAAGAATTTATGATAGTTAATATGGGACCTCACCACCCGTCAATGCATGGTGTTCTTCGTCTCATCGTTACTCTAGACGGTGAAGATGTTATTGACTGTGAACCAATATTGGGCTATTTACACAGAGGGATGGAAAAAATTGCGGAAAACCGAACAATTATACAATATCTGCCTTATGTAACCCGTTGGGATTATTTAGCTACTATGTTCACAGAAGCAATAACTGTAAATGGACCAGAACAGTTGGGAAATATTCGCGTACCTAAAAGGGCCAGCTATATCAGAGTAATTATGTTGGAGTTGAGTCGTATAGCTTCCCATCTGTTATGGCTTGGCCCTTTTATGGCAGATATTGGTGCACAGACTCCCTTCTTCTAT…
Clausena anisata	LC794893	0.5385	0.6	56.4039	rps15	ATGGTAAAAAATGCATTCATCTCAGTTAGGGTTCAAGAAAAAAAAGAAGAAAACAGCGGATCGGTTGAATTTCAAGTATTTCGTTTCACCAACAAGATCCGGAGACTTACTTCACATTTAGAATTGCACAGAAAAGACTATTTATCTCAAAGGGGTCTACGTAAAATTTTGGAAAAACGCCAACGTCTACTAGCTTATTTGTCAAAGAAAAATAGAGTACGTTATAAAGAATTAATTAGTAAGTTGAATATCCGGGAGGCAAAAAATCGTTAA
Clausena anisata	LC794893	0.5275	0.5131	49.4104	ycf1	ATGATTTTTCAATCTTTTATACTAGGTAATCTAGTATCCTTATGCATGAAGATAATCAATTCGGTCGTTGTGGTCGGACTCTATTATGGATTTATGACCACATTCTCCATAGGGCCCTCTTATCTCTTCCTTCTCCGAGCTCGGGTTATGGAAGAAGGAGAAGAAGGAACCGAGAAGAAGGTATCAGCAACAACAGGTTTTATTGCGGGACAGCTCATGATGTTCATATCGATCTATTATGCGCCTCTGCATCTAGCATTGGGTAGACCGCATACAATAACTGTCCTAGCTCTACCGTATCTTTTGTTTCATTTCTTCTGGAACAATCCCAAACACTTTTTTGATTATGGATCTACTACCAGAAATTCAATGCGTAATCTTAGCATTCAATGTGTATTC…
Clausena anisata	LC794893	0.65	0.3125	61	orf56	TTGTGGTTCCGGAGGATCCAGCTACAGGAGAACCAGGAACGGAGAGCTTTCCCCCCTTTTCCGCCCCCACTCTTTGGTCTTAAGAATGCTGGTTTTAAGAATGAGTAA
Clausena anisata	LC794893	0.5205	0.4754	51.1295	ycf68	ATGGCGTACTTCTCCTGTTCGAACCGGGGGTTTGAAAACAAACTCCTCCTCAGGAGGATAGATGGGGCGATTCAGGTGAGATCCAATGTAGATCCAACTTTCTATTCACTCGTGGGATCCGGGCGGTCCGGGGGGGACCACCACGGCTCCTCTCTTCTCGATAATCCATACATCCCTTATCAGTGTATGGACAGCTATCTCTCGAGCACAGGTTTAGGTTCGGCCTCAATGGGAAAAAAAATGGAGCACCTAACAACGTATCTTCACAGACCAAGAACTACGAGATCGCCCCTTTCATTTCATTCTGGGGTGACGGAGGGATCGTACCATTCGAGCCTTTTTTTTTTTTTCATGCTTTTCCCGGAGGTCTGGAGAAAGCTGCAATCAATAGGATTTTCC…
Clausena anisata	LC794893	0.5135	0.5798	43.6563	rps7	ATGTCACGTCGAGGTACTACAGAAGAAAAAACTGCAAAATCCGATCCAATTTATCGTAATCGATTAGTTAACATGTTGGTTAACCGTATTCTGAAACACGGAAAAAAATCATTGGCTTATCAAATTATCTATCGAGCCTTGAAAAAGATTCAACAAAAGACAGAAAAAAATCCACTATCTGTTTTACGTCAAGCAATACGTGGAGTAACTCCCGATATAGCAGTAAAAGCAAGACGTGTAGGCGGATCGACTCATCAAGTTCCCATTGAAATAGGATCCGCACAAGGAAAAGCACTTGCCGTTCGTTGGTTATTAGGGGCATCCCGAAAACGTCCGGGTCGAAATATGGCTTTCAAATTAAGTTCCGAATTAGTGGATGCTGCCAAAGGGAGTGGCGAT…
Clausena anisata	LC794893	0.4303	0.4538	50.2409	ndhB	ATGATCTGGCATGTACAGAATGAAAACTTCATTCTCGATTCTACGAGAATTTTTATGAAAGCCTTTCATTTGCTTCTCTTCGATGGAAGTTTTATTTTCCCAGAATGTATCCTAATTTTTGGCCTAATTCTTCTTCTGATGATCGATTCAACCTCTGATCAAAAAGATATACCTTGGTTATATTTCATCTCTTCAACAAGTTTAGTAATGAGCATAACGGCCCTATTGTTCCGCTGGAGAGAAGAACCTATGATTAGCTTTTCGGGAAATTTCCAAACGAACAATTTCAACGAAATCTTTCAATTTCTTATTTTACTATGTTCAACTCTATGTATTCCTCTATCCGTGGAGTACATTGAATGTACAGAAATGGCTATAACAGAGTTTCTGTTATTCGTA…
Clausena anisata	LC794893	0.5714	0.6875	46.5263	ycf15	ATGCTACTGCTGAAACATAGAAGAATTGAAATCTTAGATCAAAACACTATGTATGGATGGTATGAACTGCTTAAACAAGAATTCTTGAACAGCGAACCACCAGAGCTATTACTAACTACATCAAAAAATTTCCATTAA
Clausena anisata	LC794893	0.538	0.4394	53.7254	ycf2	ATGAAAGGACATCAATTCAAATCCTGGATTTTCGAATTGAGAGAGATATTGAGAGAGATCAAGAATTCTCACTATTTCTTAGATTCATGGACCCAATTCAATTCAGTGGGATCTTTCATTCACATTTTTTTCCACCAAGAACGTTTTATAAAACTCTTGGACCCACGAATTTGGAGTATCCTACTTTCACGCAATTCACAGGGTTCAACAAGCAATCGATATTTCACGATCAAGTGTGTAGTACTGTTTGTAGTAGCGATCCTTATATATCGTATTAACAATCGAAATATGGTCGAAAGAAAAAATCTCTATTTGACAGGGCTTCTTCCTATACCTATGAATTCCATTGGACCCAGAACTGATACATTGGAAGAATCTTTTGGGTCTTCCAATATCAAT…
Clausena anisata	LC794893	0.6071	0.5	61	rpl23	ATGGATGGAATCAAATATGCAGTATTTACAGACAAAAGTATTCGGTTATTGGGGAAAAATCAATATACTTCTAATGTCGAATCAGGATCAACTAGGACAGAAATAAAGCATTGGGTCGAACTCTTCTTTGGTGTCAAGGTAATAGCTATGAATAGTCATCAACTCCCCCGAAAGGGTAGAAGAATGGGACCTATTATGGCACATACAATGCATTACAGACGTATGATCATTACGCTTCAACCGGGTTATTCTATTCCACCTCTTAGAAAGAAAAGAACTTAA
Clausena anisata	LC794893	0.5	0.5081	55.0925	rpl2	ATGGCGATACATTTATACAAAACTTCTACCCCGAGCACACGCAATGGAGCCGTAGACAGTCAAGTGAAATCCAATCCACGAAATAATTTGATCTATGGACAGCATCGTTGTGGTAAAGGTCGTAATGCCAGAGGAATCATTACCGCAGGGCATAGAGGGGGAGGTCATAAGCGTCTATACCGTAAAATAGATTTTCGACGGAATGAAAAAGACATATATGGTAGAATCGTAACCATAGAATACGACCCTAATCGAAATGCATACATTTGTCTCATACACTATGGGGATGGTGAGAAGAGATATATTTTACATCCCAGAGGGGCTATAATTGGAGATACCATTGTTTCTGGTACAGAAGTTCCTATAAAAATGGGAAATGCCCTACCTTTGACCGATATG…
Clausena anisata	LC794893	0.5417	0.4928	49.7899	rps19	GTGACACGTTCACTAAAAAAAAATCCTTTTGTAGCGAATCATTTATTAAGAAAAATCGATAAGCTTAATACAAAAGCGGAAAAAGAAATAATAATAACTTGGTCCCGGGCATCTACCATTATACCCACAATGGTCGGCCATACTATTGCTATCCATAATGGAAGGGAGCATTTGCCTATTTATATAACAGATCGTATGGTAGGACATAAATTGGGAGAATTTGCGCCCACTATCAATTTCCGTGGACATGCAAAAAATGATAATAGATCCCGTCGTTAA
Clausena anisata	LC794893	0.56	0.4364	39.67	rpl22	ATGATAAGGATAATAAAGAAGAAGGTAGAAGTATCTGCTTTAGGTCAACATATATGTATGTCTGCTCACAAAGCCCGAAGGATAATTGATCAGATTCGTGGACGTTCTTACGAGGAAACCCTTATGATACTCGAACTCATGCCTTATCGAGCATGTTATCCCATTTTTAAATTGGTTTATTCTGCAGCAGCAAATGGTATTCACAATCTGGGTTTCAACGAAGTTTATAGCTGTTTATAG
Clausena excavata	KU949003	0.4634	0.519	61	rps12	ATGCCAACTATTAAACAACTTATTAGAAACCCAAGACAGCCAATCAGAAACGTTACCAAATCCCCCGCTCTGCGGGGATGCCCTCAGCGCCGAGGAACATGTACAAGGGTGTATGTGACTATCACCCCCAAAAAACCAAACTCTGCCTTACGTAAAGTTGCCAGAGTACGATTAACCTCTGGGTTTGAAATCACTGCTTATATACCTGGTATTGGCCATAATTCACAAGAACATTCTGTAGTCTTAGTAAGAGGGGGGAGGGTTAAGGATTTACCCGGTGTGAGATATCACATTGTTCGAGGAACCCTAGATGCTGTCGGAGTAAAGGATCGTCAACAAGGGCGTTCTAGTGCGTTGTAG
Clausena excavata	KU949003	0.3471	0.3219	35.8049	psbA	ATGACTGCAATTTTAGAGAGACGCGAAAGCGAACGCCTATGGGGTCGCTTCTGTAACTGGATAACTAGCACTGAAAACCGCCTTTACATTGGCTGGTTTGGTGTTTTGATGATCCCTACTTTATTGACCGCAACTTCTGTATTTATTATCGCCTTCATTGCTGCCCCTCCAGTAGATATTGATGGTATTCGTGAACCTGTTTCTGGATCTCTACTTTATGGAAACAATATTATTTCTGGTGCGATTATTCCTACTTCTGCAGCTATAGGTTTGCATTTTTACCCGATATGGGAAGCGGCATCCGTTGATGAATGGTTATACAATGGCGGTCCTTATGAGCTAATTGTTCTACACTTCTTACTTGGTGTAGCTTGTTACATGGGTCGTGAGTGGGAACTT…
Clausena excavata	KU949003	0.5515	0.4023	49.721	matK	ATGGAGGAATTTCAAGTATATTTAGAACTAGATAGATCTCAACAACACGACTTCCTATACCCACTTCTTTTTCGGGAGTATATTTATGTACTTGCTCATGATCATGGTTTAAATAGCTCGATGATGTCATTGGAAGGTGGGTTTTATGACAATAAATCTAGTTCGCTAAGTGTGAAACGGTTAATTACTAGAATGTATCAACGGATTAATTTGAGTATTGCTATTGCTGCTAATGATTCGAATCAAAATCCAATTATTGGGCACAACAATAAGTTGTATTCTCAAATTATATCAGAGGTATTTGCTGCCGTGGTGGAAATTCCATTTTCCCTACGGTTGGTAGCTTATTTAGAAGGGAAAGAAATTGAAAAATCGCCTAATTTCCAATCAATTCATTCA…
Clausena excavata	KU949003	0.55	0.4265	50.6873	rps16	ATGGTAAAACTTCGTTTGAAACGATGTGGTAGAAAGCAAGCCGTTTATCGAATCGTTGCAATTGATGGTCGATCCCGAAGAGAAGGAAGAGATCTTCGGAAAGTGGGTTTTTATGATCCGATAAATAATCAAACCCATTTAAATGTTCCTGCTATTCTATATTTCCTTGCCAAGGGCGCTCAACCTACAGGAACCGTTCATGATATTTCACAGAAAGCGGGGGTTTTTACAGAACTTAGTCTTAATCAAACGAAATTCTATTAA
Clausena excavata	KU949003	0.4444	0.3182	32.9203	psbK	ATGCTTAATATCTTTAGTTTAATGTATATCTGTCTTAATTCTGCCCTTTATTCGAGTAGTTTTTTATTCGCCAAATTACCCGAGGCCTACGCTTTTTTGAATCCAATTGTAGATGTTATGCCAGTAATACCTGTTCTATTTTTTCTCTTAGCCTTTGTTTGGCAAGCTGCTGTAAGTTTTCGGTGA
Clausena excavata	KU949003	0.25	0.4286	61	psbI	ATGCTTACTCTCAAACTCTTTGTTTACACCGTAGTGATATTCTTTGTTTCGCTCTTCATCTTCGGATTCCTGTCTAATGATCCAGGTCGTAATCCCGGACGCGAAGAATAA
Clausena excavata	KU949003	0.5102	0.5042	50.8309	atpA	ATGGCAACAATTAAAGCCGACGAAATTAGTAATATTATCCGTGAACGTATTGAGCAATATAATAGAGAAGTAAAGATTGTAAATATTGGGACCGTACTTCAAGTAGGCGACGGCATCGCCCGTATTTATGGTCTTGATGAAGTAATGGCAGGTGAATTAGTAGAATTTGAAGACGGTACAATAGGCATTGCTCTTAATTTGGAATCAAATAATGTTGGTGTTGTTTTAATGGGTGACGGTTTAATGATACAAGAAGGAAGTTCTGTAAAAGCAACCGGAAAAATTGCTCAGATACCAGTAAGCGAGGCTTATTTAGGGCGTGTTATAAATGCCCTGGCTAAACCTATTGATGGGCGAGGTGAAATTTCAGCTTCTGAATCTAGATTAATTGAATCCCCT…
Clausena excavata	KU949003	0.6066	0.512	54.0846	atpF	ATGAAAAATGGAACCGATTCTTTCGTTTCTTTGGTTAACTGGCCATTCGCCGGGAGTTTCGGGCTTAATACCGATATTTTAGCAACAAATCCAATAAATCTAAGTGTAGTGCTTGGTGTATTGATCTTTTTTGGAAAGGGAGTGTGTGTAAGTGATTTATTAGATAATCGCAAACTGAGGATTTTGAATAGTATTCGAAATTCAGAAGAACTGCAGGGAGGGGCCATTGAACGGCTGGAAAAAGCCCGGGCCCGGTTACGAAAAATCGAAATAGAAGCAGATCAGTTTCGAGTGAATGGATACTCTGAGATAGAACGAGAAAAATTCAATTTGATTAATTCAACTTATAAGACTTTGGAGCAATTAGAAAATTACAAAAATGAAACCATTCATTTTGAA…
Clausena excavata	KU949003	0.7826	0.3729	58.9299	atpH	ATGAATCCACTTATTTCTGCCGCTTCCGTTATTGCTGCTGGGTTGGCTGTTGGGCTTGCTTCTATTGGACCTGGAGTTGGTCAAGGTACTGCTGCGGGCCAGGCAGTAGAAGGGATCGCGAGACAGCCCGAGGCGGAGGGAAAAATACGAGGTACTTTATTGCTTAGTCTGGCTTTTATGGAAGCTTTAACAATTTATGGGCTGGTTGTAGCATTAGCACTTTTATTTGCGAATCCTTTTGTTTAA
Clausena excavata	KU949003	0.4167	0.4261	48.1604	atpI	ATGAATGTTCTATCATGTTCCATGAACACACTAAAGGGGTTATACGATATATCCGGTGTGGAAGTAGGCCAACATTTCTATTGGCAAATAGGTGGGTTCCAAGTCCATGCCCAAGTACTTATTACTTCTTGGGTTGTAATTGCTATCTTATTAGGTTCAGCCTTTATAGCCGTTCGGAATCCACAAACCGTTCCGACTGCCACTCAAAATTTCTTCGAATATGTCCTTGAATTCATTCGAGACGTGAGCAAAACTCAGATTGGAGAAGAATATGGCCCATGGGTTCCCTTTATTGGAACTCTGTTTCTTTTTATTTTTGTTTCTAATTGGTCAGGTGCTCTTTTACCTTGGAAACTCATAGAGTTACCTCATGGGGAGTTAGCCGCACCCACGAATGAT…
Clausena excavata	KU949003	0.5733	0.4568	55.6914	rps2	ATGGCAAGAAGGTATTGGAACATCCATTTGGAAGAAATGATGGAAGCAGGAATTCATTTTGGTCATGGTACTCGGAAATGGAATCCTAGAATGGCACCTTATATATCTGCAAAACATAAAGGTATTCATATTATAAATCTGACTCGAACTGCTCGGTTTTTATCCGAAGCTTGTGATTTAGTTTTTGATGCAGCAAGTAGGGGAAAACAATTCTTAATTGTTGGTACTAAAAATAAAGTGGCTGATTTAGTCGCGCGAGCTGCAATAAGGGCTCGGTGCCATTATGTTAATCAAAAATGGCTCGGCGGTATGTTAACCAATTGGTCCACTACAGAAACGCGACTTCACAAGTTCAGGGATTTGAGAACGGAACAAAAAGGGGGGAGACTCGACAGTCTT…
Clausena excavata	KU949003	0.5727	0.4655	53.16	rpoC2	ATGGCAGAACGGGTGAGTCTGGTCTTTCACAATAAAATGATAGATGGAACTGCCATTAAACGACTTATTAGCAGGTTAATAGATCATTTCGGAATGGCATATACATCACACATCCTGGATCAAGTAAAGACCCTGGGGTTCCAGCAAGCCACTGCTACGTCTATTTCATTAGGTATTGATGATCTTTTAACGATACCTTCTAAGCGATGGCTAGTCCAAGATGCTGAACAACAAAGTTTTATTTTGGAAAAACACTATCATTATGGGAATGTACACGCGATAGAAAAACTACGGCAATCCATTGAGATATGGTATGCTACAAGTGAATATTTGCGACAAGAGATGAATCCTAATTTTAGGATGACTGAACCTTTTAATCCAGTCCATATAATGTCTTTT…
Clausena excavata	KU949003	0.5805	0.4654	51.4298	rpoC1	ATGATTGATCGATATAAACATCAACAACTCCGAATTGGATCAGTTTCTCCTCAACAAATAAGCGCTTGGGCCAATAAAATCCTACCTAATGGAGAGATAATTGGAGAAGTGACAAAACCCTATACTTTTCATTACAAAACCAATAAACCGGAAAAAGATGGATTATTTTGTGAAAGAATTTTTGGGCCTATTAAAAGTGGAATTTGTGCTTGTGGAAATTATCGAATAATCGGAGATGAAAAAGAAGACCCGCAATTTTGTGAACAATGTGGGGTTGAATTTGTTGATTCTCGGATACGAAGATATCAAATGGGATACATAAAACTGGGATGCCCAGTAACCCACGTGTGGTATTTGAAACGTCTTCCTAGTTATATCGCGAATCTTTTAGATAAACCT…
Clausena excavata	KU949003	0.6128	0.4926	50.8064	rpoB	ATGCTCGGAGATGGAAATGCGGGAATGTCTACAATACCTGGGTTGAATCAGATCCAATTTGAAGGATTTTGTAGGTTCATTGATCAGGGCTTAACAGAAGAGCTTTATCAGTTTCCAAAAATTGAAGATACAGATCAAGAAATTGAATTTCAATTATTTGTGGAAACATATCAATTGGTAGAACCCTTGCTAAACGAAAGAGATGCTGTATATGAATCATTCACGTATTCTTCTGAATTATATGTATCCGCAGGATTAATTTGGAAAAGCCGAGGGGATATGCAGGAACAAACAATTTTTATTGGAAACATTCCTCTAATGAATTCTTTGGGAACTTCTATAGTAAACGGAATATACAGAATTGTCATCAATCAAATATTGCAAAGTCCCGGTATCTAT…
Clausena excavata	KU949003	0.6	0.55	61	petN	ATGGATATAGTAAGTCTAGCTTGGGCTGCTTTAATGGTAGTCTTTACATTTTCCCTTTCGCTCGTAGTATGGGGAAGAAGTGGACTCTAG
Clausena excavata	KU949003	0.5556	0.4231	45.1818	psbM	ATGGAAGTAAATATTCTCGCATTTATTGCTACTACACTGTTCGTTCTAGTTCCTACTGCGTTTTTGCTTATAATATACGTAAAAACGGTCAGTCAAAGTGATTAA
Clausena excavata	KU949003	0.4426	0.3707	51.0208	psbD	ATGACTATAGCCCTTGGTAAATTTACCAAAGAGGAAAAGGATTTATTTGATATTATGGATGACTGGTTACGTAGGGACCGATTCGTTTTTGTAGGTTGGTCTGGCCTATTGCTCTTTCCTTGTGCCTATTTCGCTTTAGGGGGTTGGTTCACAGGCACAACCTTTGTAACTTCATGGTATACCCATGGATTAGCCAGTTCCTATTTGGAAGGCTGCAACTTCTTAACCGCCGCAGTTTCGACTCCTGCTAATAGTTTAGCGCATTCCTTGTTGTTACTATGGGGTCCTGAAGCACAAGGAGATTTTACTCGCTGGTGTCAATTAGGTGGTCTTTGGACTTTTGTTGCTCTCCACGGTGCTTTCGGACTAATAGGTTTCATGTTACGTCAATTTGAACTT…
Clausena excavata	KU949003	0.4966	0.3898	50.1855	psbC	GTGGAAACGCTCTTTAATGGAACTTTAGCTGTCGCAGGTCGTGACCAAGAAACCACCGGTTTCGCTTGGTGGGCCGGGAATGCCCGACTTATCAATTTATCCGGTAAACTGCTGGGCGCTCATGTAGCCCATGCTGGATTAATCGTATTCTGGGCCGGAGCAATGAACCTATTTGAAGTGGCTCATTTCGTACCAGAAAAGCCCATGTATGAACAAGGATTAATTTTACTTCCCCACCTAGCTACTCTAGGCTGGGGGGTAGGTCCTGGTGGGGAAGTTATAGACACCTTTCCATACTTTGTATCTGGAGTACTTCACTTAATTTCCTCTGCAGTATTGGGCTTTGGCGGTATTTATCATGCACTTCTGGGACCTGAGACTCTTGAAGAATCTTTTCCA…
Clausena excavata	KU949003	0.5	0.3488	52.7462	psbZ	ATGACTATTGCTTTCCAATTGGCTGTTTTTGCATTAATTGCTACTTCATCAATCTTACTGATTAGTGTACCCGTTGTATTTGCTTCTCCGGACGGTTGGTCGAGTAACAAAAATGTCGTATTTTCTGGTACATCATTGTGGATTGGATTAGTCTTTCTGGTGGGTATCCTTAACTCTCTCATTTCTTAA
Clausena excavata	KU949003	0.6857	0.5606	48.1177	rps14	ATGGCAAGGCAAAGTTTGATTCAGAGGGAAAAGAAAAGGCACAAATTGGAACAAAAATATTATTTGATTCGTCGATCCTCAAAAAAAGAAATAAACAAAGTTCCATCGTTGAGCGATAAATGGAAAATTCATGGAAAGTTACAATCCTCACCGCGTAATAGTGCACCTACCCGTCTTCATCGACGTTGTTTTTTGACCGGAAGGCCGAGAGCTACCTATCGAGACTTTGGACTATCCGGACACATACTTCGTGAAATGGTTCATGCGTGTTTGTTGCCGGGGGCAACAAGATCAAGTTGGTAA
Clausena excavata	KU949003	0.5591	0.3701	52.5901	psaB	ATGGCATTAAGATTTCCAAGGTTTAGCCAAGGCTTAGCTCAGGACCCCACTACTCGTCGTATTTGGTTTGGTATTGCTACCGCACATGACTTCGAGAGTCATGATGATATTACTGAGGAACGTCTTTATCAGAATATTTTTGCTTCTCACTTCGGGCAATTAGCAATAATTTTTCTGTGGACTTCCGGAAATCTCTTTCATGTAGCTTGGCAAGGAAATTTTGAGGCATGGGTACAGGACCCTTTACATGTAAGACCTATTGCTCATGCAATTTGGGATCCTCATTTTGGTCAACCGGCCGTGGAAGCTTTTTCTCGGGGAGGTGCTCTTGGCCCGGTGAATATCGCTTATTCTGGTGTTTATCAGTGGTGGTATACAATTGGTTTACGCACTAATGAG…
Clausena excavata	KU949003	0.5152	0.4271	52.4774	psaA	ATGATTATTCGTTCGCCGGAACCAGAAGTAAAAATTTTGGTAGATAGGGATCCCGTAAAAACTTCTTTCGAGGAATGGGCCAAACCGGGGCATTTCTCAAGAACCATAGCTAAGGGACCTGAGACTACCACTTGGATCTGGAACCTACATGCTGATGCTCACGACTTCGATAGCCATACCAGCGATTTGGAGGAGATCTCTCGAAAAGTATTTAGTGCCCATTTCGGACAACTCTCCATCATTTTTCTTTGGCTGAGCGGCATGTATTTCCACGGTGCTCGTTTTTCCAATTATGAAGCCTGGCTAAGCGATCCTACTCACATTGGACCTAGCGCACAGGTGGTTTGGCCAATAGTGGGCCAAGAAATATTGAACGGTGATGTGGGCGGGGGTTTCCGA…
Clausena excavata	KU949003	0.5818	0.4609	52.9067	ycf3	ATGCCTAGATCGCGGATAAACGGAAATTTTATTGATAAGACCTTTTCGATTGTAGCCAATATATTATTACGAATAATTCCGACAACTGCAGGAGAAAAAGAGGCATTTACCTATTACAGAGATGGTGGGATGTCAGCTCAATCTGAAGGCAATTATGCGGAAGCTTTACAGAATTATTATGAAGCTATGCGACTAGAAATTGATCCCTACGATCGAAGCTATATACTCTATAACATAGGCCTTATCCACACAAGTAACGGAGAACATACAAAAGCTTTAGAATATTATTTTCGGGCACTAGAACGAAATCCGTTCTTACCACAAGCTTTTAATAATATGGCTGTGATCTGTCATTACCGGGGGGAACAGGCCGTTCTACAGGGAGATTCTGAAATTGCG…
Clausena excavata	KU949003	0.5094	0.4966	61	rps4	ATGTCACGTTACCGAGGGCCTCGTTTCAAAAAAATACGCCGTCTGGGGGCTTTGCCGGGACTAACGAGTAAAAGGCCTAGAGCCGGAAGCGATTTTAGAAACCAATCGCGCTCCGTAAAAAAATCTCAATATCGAATTCGTTTAGAAGAAAAACAAAAATTGCGTTTTCATTATGGTCTTACAGAACGACAATTACTTAAATATGTTCGTATCGCCGGAAAAGCCAAAGGGTCAACCGGTCTGGTTTTACTACAATTACTTGAAATGCGTTTGGATAACATTCTTTTTCGATTGGGTATGGCTTCAACTATTCCTCAAGCCCGCCAATTGGTTAACCATCGACATATTTTAGTTAATGGTCGTATAGTCGATATACCAAGTTATCGTTGCAAACCCCGA…
Clausena excavata	KU949003	0.6531	0.4091	49.3468	ndhJ	ATGCAGGGTCGTTTGTCTGCTTGGCTGGTCAAGCATGGGCTAGTTCATAGATCTTTGGGCTTTGATTACCAAGGAATAGAAACTTTACAAATAAAGCCCGAGGATTGGCACTCTGTTGCTGTCATTTTGTATATATATGGTTACAATTATCTACGTTCCCAATGTGCCTATGATGTAGCACCGGGTGGACTGTTAGCCAGCGTGTATCATCTTACGCGAATAGAGTATGGTGTAGATCAACCAGAAGAGGTATGCATAAAAGTATTTGCTCCAAGGAGTAATCCTAAAATTCCATCGGTTTTCTGGGTTTGGAAAAGTGCGAATTTTCAAGAACGGGAATCTTATGATATGCTGGGAATCCTTTATGATAATCATCCACGACTGAAACGTATCTTAATG…
Clausena excavata	KU949003	0.5385	0.4479	56.8381	ndhK	ATGAATTCTATTGAATTTTCCTTACTTGATCGAACAACCCCAAATTCATTTATTTCAACTACATCAAACGATCTTTCAAATTGGTCAAGACTCTCCAGCTTATGGCCGCTTCTTTATGGTACCAGTTGTTGTTTCATTGAATTTGCTTCATTAATTGGCTCGCGGTTCGATTTTGACCGTTATGGGCTGGTACCAAGATCGAGCCCTAGACAGGCGGACCTAATTTTAACAGCTGGTACAGTAACAATGAAAATGGCTCCTTCTTTAGTGAGATTATATGAACAAATGCCTGAACCAAAATATGTTATTGCTATGGGAGCATGTACAATTACAGGGGGGATGTTCAGTACCGATTCGTATAGTACTGTTCGAGGAGTTGATAAGCTAATTCCCGTGGAT…
Clausena excavata	KU949003	0.6216	0.3929	52.6074	ndhC	ATGTTTCTGCTTTACAAATATGATATTTTCTGGGCATTTCTAATAATATCAAGTATTATTCCTATTTTGGCATTTCTAATTTCCGCAGTTTTAGCCCCGATTAACAAAGGGCCGGAGAAACTTTCTAGTTATGAATCGGGTATCGAACCAATGGGCGATGCTTGGTTACAATTTCGAATCCGGTATTATATGTTTGCTCTAGTTTTTGTTGTTTTTGATGTTGAAACCGTTTTTCTTTATCCATGGGCAATGAGTTTTGATGTATTGGGGGTACCCGTATTTATAGAAGCTTTCATTTTCATGCTTATCCTAATTGTTGGTTTAGTTTATGCGTGGCGCAAAGGAGCATTAGAGTGGTCTTAG
Clausena excavata	KU949003	0.6216	0.4845	56.9827	atpE	ATGACCTTAAATCTTTGTGTACTGACTCCTAATCGAATTGTTTGGGATTCAGAAGTGAAAGAAATCATTTTATCTACTAATAGTGGACAAATAGGCGTATTACCAAATCACGCGCCTATTGCCACAGCTGTAGATATAGGTATTTTAAGAATCCGATTTAACGACCAATGGTTAACGATGGCTCTGATGGGTGGTTTTGCTAGAATAGGGAATAATGAGATCACTATTTTAGTAAATGATGCGGAGAAGAGTAGTGACATTGATCCCCAAGAAGCCCAGCAAACTCTTGAAATAGCAGAAGCTAATTTGAGGAAAGCTGAAAGCAAGAGACAAACAATTGAGGCAAATCTAGCTCTCAGACGAGCTAGGACACGAGTAGAGGTTATTAATGCGATTTCA…
Clausena excavata	KU949003	0.5192	0.4636	51.6845	atpB	ATGAGAATAAATCCTACTACTTCCGGTCCTGGGGTTTCCGCGCTTGCAAACAAAAACCTAGGACATATCTCTCAAATCATTGGTCCGGTACTGGATGTAGCCTTTCCCCCCGGCAAGATGCCTAATATTTACAATGCTCTGGTAGTTAAGGGTCGAGATACTGTCGATCAACCAATTAATGTGACTTGCGAGGTACAGCAATTGTTAGGGAATAATCGAGTTAGAGCTGTAGCCATGAGTGCTACAGATGGTCTAACGAGGGGTATGGAAGTAATTGACACGGGAGCTCCTCTAAGTGTTCCAGTCGGCGGAGCGACTCTAGGACGAATTTTCAACGTGCTTGGAGAGCCTATTGATAATTTAGGTCCTGTAGATACTCGCACAACATCCCCTATTCAT…
Clausena excavata	KU949003	0.5096	0.4044	51.3011	rbcL	ATGTCACCACAAACAGAGACTAAAGCGAGTGTTGGATTCAAGGCCGGTGTTAAAGATTATAAATTGACTTATTATACTCCTGACTATGTAACCAAAGATACTGATATCTTGGCAGCATTCCGAGTAACTCCTCAGCCCGGAGTTCCACCCGAGGAAGCGGGGGCTGCGGTAGCTGCGGAATCTTCTACTGGTACCTGGACAACTGTGTGGACCGATGGGCTTACCAGCCTTGATCGTTACAAAGGGCGATGCTACAACATTGAGCCCGTTGCTGGAGAAGAGAATCAATATATATGTTATGTAGCTTACCCGTTAGACCTTTTTGAAGAAGGTTCTGTTACTAACATGTTTACTTCCATTGTGGGTAATGTATTTGGTTTCAAAGCACTGCGCGCTCTA…
Clausena excavata	KU949003	0.5379	0.3547	45.7319	accD	ATGAAAAAAGGGTGGTTCAATTCGATGTTTTCTAAGGGTAAGGGGGAATTAGAATCCAGGTGTTGGTTAAGTAAATCCATGGAGAGCCCTGGTCCTATTAAAAATTCCAGTGTAAGCGAGGAACTGATTAGGAATGATAAGGATAAAAACATTCATAGTTCGAGTGATAGTGACAGTTCAAGTTACAGCAAATTAGCAGGTGTCAGGGACATTCAAAATATCATCTCGGATGACACTTTTTTTGTTAAGGATAGTAATAGGGACAGTTATTCCATCTATTTTGATATTGAAAATCAAATTTTGGAACTAGACAATGCTCATTCTTTTCTGAGTGAACTAGAAAGTTATTTTTATAGTTTTCGTAATTATAGTTCGAGGAATAATGGATCTAAAAGCGAT…
Clausena excavata	KU949003	0.6429	0.4167	61	psaI	ATGACAATTCTCAACAGCTTTCCCTCTATTTTTGTGCCTTTAGTGGGCCTAGTATTTCCGGCAATGGCAATGGCTTCGTTATTTCTTTATCTTGAAAAAAATAAGATTTTGTAA
Clausena excavata	KU949003	0.5758	0.4286	61	ycf4	ATGAGTTGGCGATCAGAATATATATGGATAGAATTTATAGCGGGCTCTCGTAAACCGGGCAATTTCTTATGGGCCTTTATCCTTTTTTTAGGCTCATTAGGATTCTTAGTGGTTGGAATTTCTAGTTATCTTGATAGGAATTTGCTATCTTTATTGCCGTCGCAGCAAATAAATTTTTTTCCACAAGGGATCGTGATGTCTTTCTACGGGATCGCGGGTCTCTTTATTAGTTCCTATTTGTGGTGCACAATTACATGGAATGTAGGTAGCGGTTATGATCGATTTGATACAAAAGAGGGAATAGTGTGTATTTTTCGTTGGGGATTTCCTGGAAAAAATCGCCGCATCTTTCTACGATTCCTTCTGAAAGATATTCAGTCCATCAGAATAGAAGTTAAA…
Clausena excavata	KU949003	0.48	0.4062	59.9548	cemA	ATGACAAAAAAGAACGCATCCATTCCCCTTAGATATCTTTCATCTATAGTATTTGTAGTATTTTTGCCCTGGTGGATCCCTCTCTCATTTAATAAAAGTCTGGAATCCTGGGTTACTAATTGGTGGAATACTAGTCAATCCGAAACCTTTTTGAATGATATTCAAGAAAAGGCTATTCTAGAAAAATTCATAGAATTAGAGGAATTATTCCTCTTGGACGAAATGATAAAGGAATTTCCGGAAAGACATCTAGAAAAGCTTCATATAGGGCTCCAGAAAGAAACAATCCAATTAATCAAGATGCACGATGAGGATCATATCCATACGATTTTTCACTTCTCGACAAATACAATCTGCTTCGTTATTCTAAGTGGTTATTCTATTCTGTGTAATGAAGAA…
Clausena excavata	KU949003	0.5673	0.4654	60.4001	petA	ATGCAAATTAGAAATACCTTTTCTTCGTTAAAGGGAGAGATTACTCGATTCATTTCCGTATACCTCATGATATATATAATAACTCGGGCATCAATTTCAAATGCATATCCTATTTTTGCGCAGCAGGGTTTTGAAAATCCACGAGAAGCAACTGGTCGTATTGTATGCGCCAATTGCCATTTAGCTAATAAGCCCGTGGATATTGAGGTTCCACAGGCGGTACTCCCCGATACTGTATTTGAAGCAGTTGTTAGAATTCCTTATGATATGCAACTGAAACAAGTTCTTGCTAATGGTAAAAAGGGGGCTTTGAATGTGGGGGCTGTTCTTATTTTACCAGAGGGGTTTGAATTAGCCCCCCCCGATCGTATTTCGCCCGAGATGAAAGAAAAGATAGGC…
Clausena excavata	KU949003	0.5	0.3704	23.2532	psbJ	ATGGCCGATACTACTGGAAGGATTCCCCTTTGGATAATAGGAACTGTAACTGGTATTCCTGTGATCGGTTTAATAGGCATTTTCTTTTATGGTTCATATTCCGGATTAGGTTCGTCCTTGTAG
Clausena excavata	KU949003	0.2667	0.5	61	psbL	ATGACACAATCAAACCCAAACGAACAAAATGTTGAATTGAACCGTACCAGTCTCTACTGGGGGTTATTACTCATTTTTGTACTTGCTGTTTTATTTTCCAATTACTTCTTCAATTAA
Clausena excavata	KU949003	0.5714	0.5769	53.8	psbF	ATGACCATAGATCGAACCTATCCAATTTTTACAGTGCGATGGTTGGCTGTTCACGGACTAGCTGTACCTACCGTTTTTTTTTTGGGGTCAATATCAGCAATGCAGTTCATCCAACGATAA
Clausena excavata	KU949003	0.4375	0.4038	60.1481	psbE	ATGTCTGGAAGCACAGGAGAACGTTCTTTTGCTGATATTATTACCAGTATTCGATACTGGGTCATTCATAGCATTACTATACCGTCCCTATTCATTGCGGGTTGGTTATTCGTCAGCACGGGGTTAGCTTACGATGTGTTTGGAAGCCCCCGGCCAAACGAGTATTTTACAGAGAGCCGGCAAGGAATTCCATTAATAACCGGCCGTTTTGATTCTTTGGAACAACTCAATGAATTTAGTAGATCTTTTTAG
Clausena excavata	KU949003	0.8333	0.3462	59.7234	petL	ATGCCTACTATAACTAGTTATTTTGGTTTTCTACTAGCGGTTTTAACTATAACCTCGGCTCTATTTATTGGTCTGAGTAAGATAGGACTTATTTGA
Clausena excavata	KU949003	0.3333	0.4615	61	petG	ATGATTGAAGTCTTTCTATTTGGAATCGTCTTAGGTCTAATTCCTATTACTTTGGCTGGATTATTCGTAACCGCCTATTTACAATACAGACGTGGTGATCAGTTGGACCTTTGA
Clausena excavata	KU949003	0.5294	0.6071	61	psaJ	ATGCGAGATCTAAAAACATATCTTTCCGTGGCACCGGTATTAAGTACTCTATGGTTCGGGTCTTTAGCAGGGTTATTGATAGAAATCAACCGTTTATTCCCCGACGCATTGACATTTCCTTTTTTTTCATTCTAG
Clausena excavata	KU949003	0.5909	0.4444	34.9485	rpl33	ATGGCCAAGGGTAAAGAGGTCCGAGTAAGGGTTATTTTGGAATGTACTAGTTGTGTTCGAAACGGTGTTAATAAAGAATCAAGGGGTATTTCCAGATATATTACTCAAAAGAATCGACACAATACACCCAGTCGATTGGAATTGAGAAAATTCTGTCCCTATTGTTACAAGCATACACTTCATGGGGAGATAAAAAAATAG
Clausena excavata	KU949003	0.6296	0.4933	49.2398	rps18	ATGGATAAAACCAAGCGACTCTTTCTTAAATCCAAGCGATCTTTTCGTAGGCGTTTGCCCCCGATCCAATCGGGGGATCGAATTGATTATAGAAACATGACTTTAATTAGTCGATTTCTTAGTGAACAAGGAAAAATATTATCTAGACGGGTGAATAGATTGTCCTTAAAAGAACAACGATTAATTACTATTGCTATAAAACAAGCTCGTATTTTATCTTCGTTACCTTTTCTTAATAATGAGAAACAATTTGAAAGAAGTGGGTTGACCGCTAGACTTCCCGGTCTTCGAACCAGAAAAAAATAG
Clausena excavata	KU949003	0.6562	0.4767	56.9567	rpl20	ATGACCAGAATTAGACGAGGATATATAGCTCGGAGACGTAGAACAAAAATGCGTTTATTTGTATCAAGCTTTCGCGGGTCTCATTCACGACTTAGCCGAACAATTACTCAACAGAAAATAAGAGCTTTGATTTCGGCTCATCGCGATAGAGCTAGGAAAAAAAGGGATTTTCGTCGTTTGTGGATCACCCGAATAAATGCAGTAATTCGCGAAATTCAGGTATCCTATAGTTATAGTGTATTAATATACAATCTGTATAAGGCGCAGTTGGTTCTTAATCGTAAGATACTTGCACAAATAGCTATATCAAATAGGAATTGTCTTTATATGATTTCCAATGAGATTCTAAAATAA
Clausena excavata	KU949003	0.3934	0.4746	61	rps12	CTACAACGCACTAGAACGCCCTTGTTGACGATCCTTTACTCCGACAGCATCTAGGGTTCCTCGAACAATGTGATATCTCACACCGGGTAAATCCTTAACCCTCCCCCCTCTTACTAAGACTACAGAATGTTCTTGTGAATTATGGCCAATACCAGGTATATAAGCAGTGATTTCAAACCCAGAGGTTAATCGTACTCTGGCAACTTTACGTAAGGCAGAGTTTGGTTTTTTGGGGGTGATAGTATGCCAACTATTAAACAACTTATTAGAAACCCAAGACAGCCAATCAGAAACGTTACCAAATCCCCCGCTCTGCGGGGATGCCCTCAGCGCCGAGGAACATGTACAAGGGTGTATGTG
Clausena excavata	KU949003	0.5429	0.496	61	clpP	ATGCCTATTGGTGTTCCAAAAGTACCTTATCGAAGTCCCGGGGACAAGCATCCATCTTGGGTTGACATACGACTTTATCGAGAAAGATTACTTTTTTTAGGTCAAATGGTTGAGAGCGATATCTCGAATCAACTTATTGGTATTATGGTATATCTCAGTATAGAGAACGAGACCAAGGATTTGTATTTATTTATCAACTCTCCTGGCGGATGGGTAATACCGGGGATAGCAATTTATGATACTATGCAATTTGTGCGACCCGATGTACAGACAATATGCATGGGATTGGCCGCCTCCATGGGGTCTTTTCTCCTGGCCGCAGGAGCAAGTACCAAACGTCTAGCATTCCCTCACGCTTGGGTCATGATCCATCAACCTATTGGCGCTTTTTATGGGGCA…
Clausena excavata	KU949003	0.5185	0.4179	51.1038	psbB	ATGGGTTTGCCTTGGTATCGTGTTCATACCGTCGTATTGAATGATCCCGGTCGTTTAATTGCTGTCCATATAATGCATACAGCCCTGGTTGCGGGTTGGGCCGGTTCAATGGCTCTATATGAATTAGCTGTTTTTGATCCCTCCGATCCAGTTCTTGATCCAATGTGGAGACAAGGCATGTTCGTTATACCCTTCATGACTCGTTTAGGAATAACCGATTCATGGGGTGGTTGGAGTATTACAGGGGGGACAGTAACGAATCCGGGTATTTGGAGTTACGAAGGTGTAGCGGGGGCACATATTGTGTTTTCCGGCTTGTGCTTCTTGGCAGCTATCTGGCATTGGGTGTATTGGGATCTAGCAATATTTGTTGATGACCGTACAGGAAAACGTTCTTTG…
Clausena excavata	KU949003	0.4545	0.56	43.1429	psbT	ATGGAAGCATTGGTTTATACATTCCTCTTAGTCTCGACTCTAGGGATCATTTTTTTCGCTATCTTTTTTCGAGAACCGCCTAAAGTTCCAACTAAAAAAACAAAATGA
Clausena excavata	KU949003	0.3889	0.5769	61	psbN	ATGGAAACAGCAACCCTAGTCGCCATCTCTATATCTGGGTTACTTGTAAGTTTTACTGGGTACGCCTTATATACCGCTTTTGGGCAACCCTCTCAACAACTAAGAGATCCATTCGAGGAACACGGGGACTAG
Clausena excavata	KU949003	0.7917	0.42	58.8711	psbH	ATGGCTGCACAAACAGTTGAGGGTAGTTCTAGAGCTCGTCCAAAAAGAACTTCTGCAGGGGGGTTGTTGAAACCCTTGAATTCGGAATATGGTAAAGTAGCTCCTGGATGGGGAACTACTCCTTTGATGGGTGTCGCAATGGCTTTATTTGCGGTATTCCTATGTATTATTTTGGAGATTTATAATTCGTCCGTTTTACTGGACGGAATTTCACTGAATTAG
Clausena excavata	KU949003	0.5529	0.4257	59.5421	petB	ATGAAATTCTCATATACGGTTCTCAGAGGGGAGTTCTCTTGGTTTACCTATCTCAATAAAGTCTACGATTGGTTCGAAGAACGTCTCGAGATTCAGGCGATTGCAGATGATATAACTAGTAAATACGTTCCTCCTCATGTCAACATATTTTATTGTCTGGGAGGAATTACGCTCACTTGTTTTTTAGTACAAGTAGCTACAGGGTTTGCTATGACTTTTTACTACCGCCCGACCGTTACTGAGGCTTTTGCCTCCGTTCAATACATAATGACGGAAGTTAACTTCGGGTGGTTAATTCGATCGGTTCATCGATGGTCGGCAAGTATGATGGTCCTAATGATAATCCTGCACGTATTTCGTGTGTATCTCACCGGGGGTTTTAAAAAACCTCGCGAATTG…
Clausena excavata	KU949003	0.5111	0.4912	45.4547	petD	ATAACAAAAAAACCTGACTTGAATGATCCTGTATTAAGGGCTAAGTTGGCTAAGGGTATGGGTCATAATTATTATGGAGAACCCGCATGGCCCAACGATCTTTTATATATTTTTCCAGTAGTAATTCTAGGTACTATTGCATGTAACGTAGGCTTAGCGGTTCTAGAACCATCAATGATTGGTGAACCCGCAGATCCGTTTGCAACTCCTTTGGAAATCTTACCCGAATGGTATTTCTTTCCCGTATTTCAAATACTTCGTACAGTACCCAATAAGCTGTTGGGTGTTCTTTTAATGGTTTCAGTACCTACGGGATTATTAACAGTACCTTTTTTGGAAAATGTTAATAAATTCCAAAATCCATTTCGCCGCCCCGTAGCGACAACCGTCTTTTTGATT…
Clausena excavata	KU949003	0.5631	0.4779	55.1382	rpoA	ATGGTTCGAGAGAAAGTAAAAGTATCTACTCGGACACTGCAGTGGAAGTGTGTTGAATCAAGAACAGACAGTAAGCGTCTTTATTATGGGCGCTTTATTTTGTCTCCACTTATGAAAGGTCAAGCCGACACAATAGGCATTGCGATGCGAAGAGTTTTGCTTGGAGAAATAGAAGGAACGTGTATTACACGCGCAAAATCTGAGAAAATCCCACACGAATATTCTACCATAGTGGGTATTCAAGAATCGGTACATGAAATTTTAATGAATTTGAAAGATATTGTATTGAGAAGTAATCTTTATGGAACTTGTGACGCTCTTATTTGTGTCAAAGGCCCGGGATATGTAACTGCTCAAGACATCCTCTTGCCGCCTTCTGTGGAAATCGTTGATAATACG…
Clausena excavata	KU949003	0.5238	0.4948	61	rps11	ATGGCAAAATCTCCACCAAGAAGTGGTTCACGTAGGCCGGGACGGATTGGTTCACGTAAAAGTGGACGTCGAATACCAAAGGGCGTTATTCATGTTCAAGCAAGTTTCAACAACACCATTGTGACTGTTACAGATGTCCGGGGTCGGGTAATTTCTTGGTCCTCGGCCGGTACTTGTGGATTCAGGGGTACAAGAAGAGGTACGCCCTTTGCTGCTCAAACCGCAGCAGGAAATGCTATTCGAGCAGTAGCGGATCAAGGTATGCAACGAGCAGAAGTCATGATAAAGGGTCCTGGTCTCGGAAGAGATGCGGCATTACGAGCTATTCGTAGAAGCGGTATCCTTTTAAATTTCGTACGGGATGTAACCCCTATGCCACACAATGGTTGCAGACCCCCT…
Clausena excavata	KU949003	0.6364	0.6296	46.75	rpl36	ATGAAAATAAGGGCTTCAGTTCGTAAAATTTGTGAAAAATGTCGACTGATCCGCAGGAGGGGACGGATTATAGTAATTTGTTCCAACCCGAGACATAAACAAAGACAAGGATAA
Clausena excavata	KU949003	0.4889	0.5333	40.9667	rps8	ATGGGCAAGGACACTATTGCTGACATAATAACTTCTATACGAAATGCTGACATGAATAGAAAGGGAATGGTTCGAATAGCATCTACTAAAATCACCGAAAACATTGTTAAAATACTTTTGCGAGAGGGTTTTATCGAAAACGCAAGGAAACTCATGGAAAACAAAAAAGTTTTTTTGGTTTTAACCCTACGACATCGAAGGAATAGGAAAGGGCCGTACAGACCCATTTTCAATTTAAAACGAATCAGTCGACCCGGTCTACGAATCTATTTTAACTATCGACGAATTCCTAGAATTTTAGATGGGATGGGGATTGTAATTCTCTCCACTTCTCGGGGTATAATGACAGACCGAGCGGCTCGACTAGAAAGAATCGGTGGAGAAATTTTGTGTTATATA…
Clausena excavata	KU949003	0.4848	0.4889	51.8432	rpl14	ATGATTCAACCTCAAACCCATTTGAATGTAGCAGACAATAGCGGTGCCCGAGAATTGATGTGTATTCGAATCATAGGAGGCAGTAATCGTAGATATGCTCATATTGGTGACGTTATTGTTGCTGTGATCAAGGAAGCAGTACCCAATACGCCTCTAGAAAGATCAGAAGTGATCAGAGCTGTAATTGTACGTACTTGTAAAGAACTCAGACGTGATAACGGTATGATAATACGGTACGATGACAATGCTGCAGTTGTCATTGATCAAGAAGGAAATCCAAAGGGAACTCGAGTTTTTGGTGCGATCGCCCGGGAATTGAGACAGTTGAATTTTACTAAAATAGTTTCATTAGCACCTGAAGTATTATAA
Clausena excavata	KU949003	0.4884	0.5851	41.8121	rpl16	ATCAATTATAACCCCAAAAGAACAAGATTCCGTAAACAACATAGAGGACGAATGAAAGGGATATCTTATCGAGGTAATCATATTTGTTTCGGCAGATATGCTCTTCAAGCACTTGAACCCGCTTGGATCACATCTAGACAAATCGAAGCGGGGCGCCGAGCAATGACACGGAATATACGGCGCGGTGGAAAAATATGGGTATGTATCTTTCCAGACAAACCAGTTACAGTAAGACCCACGGAAACCCGTATGGGGTCCGGTAAAGGATCCCCCGAATATTGGGTAGCCGTCGTTAAACCGGGTAGAATACTTTATGAAATGAGTGGAGTAGCTGAAAATATAGCTCGAAAGGCTATTTCAATAGCGGCGTCCAAAATGCCTATAAGAACTCAATTCATT…
Clausena excavata	KU949003	0.4902	0.5799	59.5572	rps3	ATGGGACAAAAAATAAATCCACTAGGTTTCCGGCTTGGTACAACACAAAGTCATCATTCTCTTTGGTTTGCAAAACCAAAAAACTATTGCGAGGGTCTCCAAGAAGATCAAAAAATACGAAACTTTATTAAGAATTATGTACAAAAAAATATGAGAATATCCTCCGGTGTTGGGGGAATTGCACGGATAGAGATTCAAAAAAGAATTGATCTAATTCAAGTTATAATTTATATAGGGTTCCCAAAATTATTACTAGAAAATAGACCGCGAAGAATTGAAGAATTGCAGATGAATGTACAAAAAGAACTGAATTGTGTGAATCGAAAAATAAACATTGCTATTACAAGAATTGCAAATCCTTATGGACACCCCAATATTCTTGCCGACTTTATAGCCGGC…
Clausena excavata	KU949003	0.6111	0.4878	49.4127	rpl22	ATGATAAGGATAATAAAGAAGAAGGTAGAAGTATCTGCTTTAGGTCAACATATATGTATGTCTGCTCACAAAGCCCGAAGGGTAATTGATCAGATTCGTGGACGTTCTTACGAGGAAACCCTTATGATACTCGAACTCATGCCTTATCGAGCATGTTATCCCATTTTTCAATTTTAA
Clausena excavata	KU949003	0.5417	0.4928	49.7899	rps19	GTGACACGTTCACTAAAAAAAAATCCTTTTGTAGCGAATCATTTATTAAGAAAAATCGATAAGCTTAATACAAAAGCGGAAAAAGAAATAATAATAACTTGGTCCCGGGCATCTACCATTATACCCACAATGGTCGGCCATACTATTGCTATCCATAATGGAAGGGAGCATTTGCCTATTTATATAACAGATCGTATGGTAGGACATAAATTGGGAGAATTTGCGCCCACTATCAATTTCCGTGGACATGCAAAAAATGATAATAGATCCCGTCGTTAA
Clausena excavata	KU949003	0.4944	0.4973	53.7916	rpl2	ATGGCGATACATTTATACAAAACTTCTACCCCGAGCACACGCAATGGAGCCGTAGACAGTCAAGTGAAATCCAATCCACGAAATAATTTGATCTATGGACAGCATCGTTGTGGTAAAGGTCGTAATGCCAGAGGAATCATTACCGCAGGGCATAGAGGGGGAGGTCATAAGCGTCTATACCGTAAAATCGATTTTCGACGGAATGAAAAAGACATATATGGTAGAATCGTAACCATAGAATACGACCCTAATCGAAATGCATACATTTGTCTCATACACTATGGGGATGGTGAGAAGAGATATATTTTACATCCCAGAGGGGCTATAATTGGAGATACCATTGTTTCTGGTACAGAAGTTCCTATAAAAATGGGAAATGCCCTACCTTTGAGTGCCGAT…
Clausena excavata	KU949003	0.6071	0.5	61	rpl23	ATGGATGGAATCAAATATGCAGTATTTACAGACAAAAGTATTCGGTTATTGGGGAAAAATCAATATACTTCTAATGTCGAATCAGGATCAACTAGGACAGAAATAAAGCATTGGGTCGAACTCTTCTTTGGTGTCAAGGTAATAGCTATGAATAGTCATCAACTCCCCCGAAAGGGTAGAAGAATGGGACCTATTATGGCACATACAATGCATTACAGACGTATGATCATTACGCTTCAACCGGGTTATTCTATTCCACCTCTTAGAAAGAAAAGAACTTAA
Clausena excavata	KU949003	0.5415	0.4406	53.7401	ycf2	ATGAAAGGACATCAATTCAAATCCTGGATTTTCGAATTGAGAGAGATATTGAGAGAGATCAAGAATTCTCACTATTTCTTAGATTCATGGACCCAATTCAATTCAGTGGGATCTTTCATTCACATTTTTTTCCACCAAGAACGTTTTATAAAACTCTTGGACCCACGAATTTGGAGTATCCTACTTTCACGCAATTCACAGGGTTCAACAAGCAATCGATATTTCACGATCAAGTGTGTAGTACTGTTTGTAGTAGCGATCCTTATATATCGTATTAACAATCGAAATATGGTCGAAAGAAAAAATCTCTATTTGACAGGGCTTCTTCCTATACCTATGAATTCCATTGGACCCAGAACTGATACATTGGAAGAATCTTTTGGGTCTTCCAATATCAAT…
Clausena excavata	KU949003	0.4311	0.4551	50.6951	ndhB	ATGATCTGGCATGTACAGAATGAAAACTTCATTCTCGATTCTACGAGAATTTTTATGAAAGCCTTTCATTTGCTTCTCTTCGATGGAAGTTTTATTTTCCCAGAATGTATCCTAATTTTTGGCCTAATTCTTCTTCTGATGATCGATTCAACCTCTGATCAAAAAGATATACCTTGGTTATATTTCATCTCTTCAACAAGTTTAGTACTGAGCATAACGGCCCTATTGTTCCGCTGGAGAGAAGAACCTATGATTAGCTTTTCGGGAAATTTCCAAATGAACAATTTCAACGAAATCTTTCAATTTCTTATTTTACTATGTTCAACTCTATGTATTCCTCTATCCGTGGAGTACATTGAATGTACAGAAATGGCTATAACAGAGTTTCTGTTATTCGTA…
Clausena excavata	KU949003	0.5135	0.5798	43.6563	rps7	ATGTCACGTCGAGGTACTACAGAAGAAAAAACTGCAAAATCCGATCCAATTTATCGTAATCGATTAGTTAACATGTTGGTTAACCGTATTCTGAAACACGGAAAAAAATCATTGGCTTATCAAATTATCTATCGAGCCTTGAAAAAGATTCAACAAAAGACAGAAAAAAATCCACTATCTGTTTTACGTCAAGCAATACGTGGAGTAACTCCCGATATAGCAGTAAAAGCAAGACGTGTAGGCGGATCGACTCATCAAGTTCCCATTGAAATAGGATCCGCACAAGGAAAAGCACTTGCCGTTCGTTGGTTATTAGGGGCATCCCGAAAACGTCCGGGTCGAAATATGGCTTTCAAATTAAGTTCCGAATTAGTGGATGCTGCCAAAGGGAGTGGCGAT…
Clausena excavata	KU949003	0.5602	0.4069	45.3915	ndhF	ATGGAACATACATATCAATATTCCTGGCTCATACCTTTAGTTCCAATTCCAGTCCCTATGTTAATAGGGATGGGACTTCTATTTTTTCCGACCGCAACAAAACATCTTCGCCGTATGTGGGCTTTTATTAGTATTTTATTGTTAAGTATAGTTATGATTTTTTCGATCGATCTATCTATTGAGCAAATAGATAGAACTTCGATCCATCAATCCCTAAGGTCTTGGACCATCACTAGTGATTTTTGTTTCGAGTTCGGATACTTTATTGATCCACTTACTTCTATTATGTCAATATTAATCACTACAGTTGGAATTCTGGTTCTTATCTATAGTGAAAATTATATGTCTCATGATCAAGGATATTTGAGATTTTTTGCTTATATGAGTTTTTTCAATGCT…
Clausena excavata	KU949003	0.9286	0.5227	39.5793	rpl32	ATGGCAGTTCCAAAAAAACGTACTTCTATATTAAAAAAACGTATTCGTAAAAATCTTTGGAAAAAGGGGGGGTATTGGACAGCGTTGAAGGCTTTTTCGTTAGCGAAATCCCTTGCTACTGGAAATTCAAAAAGTTTTTTTGTACAACAAATAAATAATAAAAGGTTGAAATAA
Clausena excavata	KU949003	0.5638	0.4688	56.2744	ccsA	ATGATCTTTTCAACTTTGGAGCGTATATTAACGCATATATCCTTTTCGGTCGTTTCAATTGGAATTACAATTTATTTAATAACCTTCTTAGTCGATGAAATCAGAGGGCTATCTGCTTCATCAGAAAGGGGGATGACAGCTACCGCTTTCTGTCTAACAGGATTATTAATCACCCGTTGGGTTTACTCGAGACATTTCCCATTAAGTGATTTATATGAATCATTAATCTTTCTTTCGTGGAGTTTATCTATTATTCATAGGATTTTTGATTGTAAAAATAATCAAAATCATTTAAGCGCTATAACGGCACCAAGTGCTTTTTTTACCCAAGGCTTTGCGACTTCGGGTTTTTTAACCAAAATGCATCAATCCGGAATATTAGTACCCGCTCTCCAAGTC…
Clausena excavata	KU949003	0.506	0.4763	52.281	ndhD	GTGTATCTTGTCTTTACCACGAATTATTTTCCTTGGTTAACACTAATTGTAGTTTTTCCGATAGCCGCGGGTTCTTTAATTTTTTTTCTCCCTCATAAAGGAAATAAGGTGACTAGAGGATATACAATATATATATGTGTCTTAGAACTCCTTCTAACGACCTATGGAATTCTGTATAATTTCCAATTGGACGATCCATTAATCCAGCTGGCCGAGGATTATAAATGGATCACTTTTTTTGAGTTTGACTGGCGATTGGGAATAGATGGACTTTCCATAGGACCCATTTTACTGACGGGATTTATCACCACTTTAGCTACTTTAGCGGCTCGGCCAGTTACTCGGAATTCCCGACTATTCCACTTCCTGATGTTAGCGATGTACAGCGGTCAAATAGGA…
Clausena excavata	KU949003	0.5652	0.4915	54.5317	psaC	ATGTCACATTCAGTAAAGATTTATGATACATGTATAGGGTGTACTCAATGTGTACGAGCTTGCCCCACGGATGTATTAGAAATGATACCTTGGGACGGATGTAAAGCAAAGCAAATTGCTTCTGCTCCAAGAACAGAGGACTGTGTTGGTTGTAAGCGATGCGAATCCGCCTGTCCAACGGATTTCTTGAGTGTTCGAGTTTATTTATGGCATGAAACAACCCGAAGCATGGGTCTAGCTTATTGA
Clausena excavata	KU949003	0.5938	0.3714	61	ndhE	ATGATGCTCGAGCATGTACTTGTTTTGAGTGCCTATTTATTTTCGATTGGTATCTATGGCTTGATTACGAGCCGAAATATGGTTCGGGCCCTGATGTGTCTTGAACTTATACTAAATGCAGTTAATATAAATTTCGTAACATTCTCCGATTTTTTTGATAGTCGACAATTAAAAGGAGATATTTTTGCAATTTTTGTTATAGCTATTGCAGCCGCTGAAGCAGCTATCGGATCAGCTATTGTTTCGTCAATTTATCGTAACAGAAAATCGACGCGTATCAATCAATCGACTTTGTTGAATAAGTAG
Clausena excavata	KU949003	0.54	0.3876	61	ndhG	ATGGATTTGCCTGGACCAATACACGATTTTCTTTTAGTTTTTCTGGGATCGGGTCTTATATTAGGAGGTCTGGGAGTGGTATTATTTACCAACCCAATTTATTCTGCTTTTTCCTTGGGATTGGTTCTTGTTTGTATATCATTATTCTATATTCTATCAAATTCCCATTTTGTAGCTGCCGCGCAACTCCTTATTTACGTGGGAGCTGTAAATGTTTTAATCATATTTGCTGTAATGTTCATGAGCGGCTCAGACTATTCTAAAGATTTTCAGTTGAATCTTTGGACTATTGGCGATGGTCTTACTTCCCTGGTTTGTACAAGTATTTTTTTTTCGCTAATCACTACTATTCTAGATACGTCGTGGTACGGGATTATTTGGACTACACGAGCCAACCAG…
Clausena excavata	KU949003	0.45	0.3984	49.9524	ndhI	ATGTTCCCTATGGTAACCGGTTTCATGAATTATGGTCAACAAACAATACGAGCTGCAAGGTACATTGGTCAAAGTTTCATGATTACTTTATCCCAAGCAAATCGTTTACCTGTAACTATTCAATATCCTTATGAAAAATTAATCACATCGGAGCGTTTTCGCGGTCGAATCCATTTTGAATTTGATAAATGTATTGCTTGTGAAGTATGCGTTCGGGTATGTCCTATAGATCTGCCTGTTGTTGATTGGAACTTTGAAACAGATATTCGAAAGAAACGATTGCTTAATTACAGTATTGATTTTGGAATTTGTATTTTTTGTGGTAACTGCGTTGAGTATTGTCCAACAAATTGTTTATCAATGACTGAAGAATATGAACTTGCTACTTACGACCGTCAC…
Clausena excavata	KU949003	0.4674	0.4762	50.0704	ndhA	ATGATAATTGCTACACCCGAAGTACAAGATATCAATTCTTTTTCCAGATTGGAATCCCTACAAGAGGTCTATGGGATCATATGGGTGCTTGCCCCTATTTCTATTTATGTATTGGCAATCACAATAGGTGTCCTAGTAATTGTGTGGTTAGAAAGAGAAATATCTGCAAGAATACAACAGCGTATTGGGCCTGAATACGCCAGCCCTTTGGGAATTCTTCAAGCTTTAGCCGATGGGACAAAACTCCTTTTCAAAGAAAACCTTCTTCCCTCTAGAGGAAATAGTAGTTTATTCAGTATTGGTCCATCTATAGCAGTCATAGCAATTCTACTAAGTTATTCAGTAATTCCTTTTAGTTATAACCTTGTTTTAGCTGACCTCAATATCGGTATTTTTTTA…
Clausena excavata	KU949003	0.5856	0.4912	50.9206	ndhH	ATGAGTATACTAGCTACAGAAAAAGAATTTATGATAGTCAATATGGGACCTCACCACCCGTCAATGCATGGTGTTCTTCGTCTCATCGTTACTCTAGACGGTGAAGATGTTATTGACTGTGAACCGATATTGGGTTATTTACACAGAGGGATGGAAAAAATTGCGGAAAACCGAACAATTATACAATATCTGCCTTATGTAACCCGTTGGGATTATTTAGCTACTATGTTCACAGAAGCAATAACTGTAAATGGACCAGAACAGTTGGGAAATATTCGTGTACCTAAAAGGGCCAGCTATATCAGAGTAATTATGTTGGAGTTGAGTCGTATAGCTTCCCATCTGTTATGGCTTGGCCCTTTTATGGCAGATATTGGTGCACAGACTCCCTTCTTCTAT…
Clausena excavata	KU949003	0.5417	0.597	56.6348	rps15	ATGGTAAAAAATGCATTCATCTCAGTTAGGGTTCAAGAAAAAAAAGAAGAAAACAGCGGATCGGTTGAATTTCAAGTATTTCGTTTCACCAACAAGATCCGTAGACTTACTTCACATTTAGAATTGCACAGAAAAGACTATTTATCTCAAAGGGGTCTACGTAAAATTTTGGAAAAACGGCAACGTCTACTAGCTTATTTGTCAAAGAAAAATAGAGTACGTTATCAAGAATTAATTAGTAAGTTGAATATCCGAGAGGCAAAAAATCGTTAA
Clausena excavata	KU949003	0.5319	0.5129	49.8943	ycf1	ATGATTTTTCAATCTTTTATACTAGGTAATCTAGTATCCTTATGCATGAAGATAATCAATTCGGTCGTTGTGGTCGGACTCTATTATGGATTTATGACCACATTCTCCATAGGGCCCTCTTATCTCTTCCTTCTCCGAGCTCGGGTTATGGAAGAAGGAGAAGAAGGAACCGAGAAGAAGGTATCAGCAACAACTGGTTTTATTGCGGGACAGCTCATGATGTTCATATCGATCTATTATGCGCCTCTGCATCTAGCATTGGGTAGACCGCATACAATAACTGTCCTAGCTCTACCGTATCTTTTGTTTCATTTCTTCTGGAACAATCCCAAACACTTTTTTGATTATGGATCTACTACCAGAAATTCAATGCGTAATCTTAGCATTCAATGTGTATTC…
Clausena excavata	KU949003	0.5135	0.5798	43.6563	rps7	ATGTCACGTCGAGGTACTACAGAAGAAAAAACTGCAAAATCCGATCCAATTTATCGTAATCGATTAGTTAACATGTTGGTTAACCGTATTCTGAAACACGGAAAAAAATCATTGGCTTATCAAATTATCTATCGAGCCTTGAAAAAGATTCAACAAAAGACAGAAAAAAATCCACTATCTGTTTTACGTCAAGCAATACGTGGAGTAACTCCCGATATAGCAGTAAAAGCAAGACGTGTAGGCGGATCGACTCATCAAGTTCCCATTGAAATAGGATCCGCACAAGGAAAAGCACTTGCCGTTCGTTGGTTATTAGGGGCATCCCGAAAACGTCCGGGTCGAAATATGGCTTTCAAATTAAGTTCCGAATTAGTGGATGCTGCCAAAGGGAGTGGCGAT…
Clausena excavata	KU949003	0.4337	0.4551	50.5255	ndhB	ATGATCTGGCATGTACAGAATGAAAACTTCATTCTCGATTCTACGAGAATTTTTATGAAAGCCTTTCATTTGCTTCTCTTCGATGGAAGTTTTATTTTCCCAGAATGTATCCTAATTTTTGGCCTAATTCTTCTTCTGATGATCGATTCAACCTCTGATCAAAAAGATATACCTTGGTTATATTTCATCTCTTCAACAAGTTTAGTACTGAGCATAACGGCCCTATTGTTCCGCTGGAGAGAAGAACCTATGATTAGCTTTTCGGGAAATTTCCAAATGAACAATTTCAACGAAATCTTTCAATTTCTTATTTTACTATGTTCAACTCTATGTATTCCTCTATCCGTGGAGTACATTGAATGTACAGAAATGGCTATAACAGAGTTTCTGTTATTCGTA…
Clausena excavata	KU949003	0.5415	0.4406	53.7401	ycf2	ATGAAAGGACATCAATTCAAATCCTGGATTTTCGAATTGAGAGAGATATTGAGAGAGATCAAGAATTCTCACTATTTCTTAGATTCATGGACCCAATTCAATTCAGTGGGATCTTTCATTCACATTTTTTTCCACCAAGAACGTTTTATAAAACTCTTGGACCCACGAATTTGGAGTATCCTACTTTCACGCAATTCACAGGGTTCAACAAGCAATCGATATTTCACGATCAAGTGTGTAGTACTGTTTGTAGTAGCGATCCTTATATATCGTATTAACAATCGAAATATGGTCGAAAGAAAAAATCTCTATTTGACAGGGCTTCTTCCTATACCTATGAATTCCATTGGACCCAGAACTGATACATTGGAAGAATCTTTTGGGTCTTCCAATATCAAT…
Clausena excavata	KU949003	0.6071	0.5	61	rpl23	ATGGATGGAATCAAATATGCAGTATTTACAGACAAAAGTATTCGGTTATTGGGGAAAAATCAATATACTTCTAATGTCGAATCAGGATCAACTAGGACAGAAATAAAGCATTGGGTCGAACTCTTCTTTGGTGTCAAGGTAATAGCTATGAATAGTCATCAACTCCCCCGAAAGGGTAGAAGAATGGGACCTATTATGGCACATACAATGCATTACAGACGTATGATCATTACGCTTCAACCGGGTTATTCTATTCCACCTCTTAGAAAGAAAAGAACTTAA
Clausena excavata	KU949003	0.4944	0.5	54.312	rpl2	ATGGCGATACATTTATACAAAACTTCTACCCCGAGCACACGCAATGGAGCCGTAGACAGTCAAGTGAAATCCAATCCACGAAATAATTTGATCTATGGACAGCATCGTTGTGGTAAAGGTCGTAATGCCAGAGGAATCATTACCGCAGGGCATAGAGGGGGAGGTCATAAGCGTCTATACCGTAAAATCGATTTTCGACGGAATGAAAAAGACATATATGGTAGAATCGTAACCATAGAATACGACCCTAATCGAAATGCATACATTTGTCTCATACACTATGGGGATGGTGAGAAGAGATATATTTTACATCCCAGAGGGGCTATAATTGGAGATACCATTGTTTCTGGTACAGAAGTTCCTATAAAAATGGGAAATGCCCTACCTTTGACCGATATG…
Clausena excavata	KU949003	0.5417	0.4928	49.7899	rps19	GTGACACGTTCACTAAAAAAAAATCCTTTTGTAGCGAATCATTTATTAAGAAAAATCGATAAGCTTAATACAAAAGCGGAAAAAGAAATAATAATAACTTGGTCCCGGGCATCTACCATTATACCCACAATGGTCGGCCATACTATTGCTATCCATAATGGAAGGGAGCATTTGCCTATTTATATAACAGATCGTATGGTAGGACATAAATTGGGAGAATTTGCGCCCACTATCAATTTCCGTGGACATGCAAAAAATGATAATAGATCCCGTCGTTAA
Clausena excavata	KU949003	0.6111	0.4878	49.4127	rpl22	ATGATAAGGATAATAAAGAAGAAGGTAGAAGTATCTGCTTTAGGTCAACATATATGTATGTCTGCTCACAAAGCCCGAAGGGTAATTGATCAGATTCGTGGACGTTCTTACGAGGAAACCCTTATGATACTCGAACTCATGCCTTATCGAGCATGTTATCCCATTTTTCAATTTTAA
Clausena lansium	OL944012	0.4634	0.519	61	rps12	ATGCCAACTATTAAACAACTTATTAGAAACCCAAGACAGCCAATCAGAAACGTTACCAAATCCCCCGCTCTGCGGGGATGCCCTCAGCGCCGAGGAACATGTACAAGGGTGTATGTGACTATCACCCCCAAAAAACCAAACTCTGCCTTACGTAAAGTTGCCAGAGTACGATTAACCTCTGGGTTTGAAATCACTGCTTATATACCTGGTATTGGCCATAATTCACAAGAACATTCTGTAGTCTTAGTAAGAGGGGGGAGGGTTAAGGATTTACCCGGTGTGAGATATCACATTGTTCGAGGAACCCTAGATGCTGTCGGAGTAAAGGATCGTCAACAAGGGCGTTCTAGTGCGTTGTAG
Clausena lansium	OL944012	0.3554	0.3133	34.6259	psbA	ATGACTGCAATTTTAGAGAGACGCGAAAGCGAACGCCTATGGGGTCGCTTCTGTAACTGGATAACTAGCACTGAAAACCGCCTTTACATTGGCTGGTTTGGTGTTTTGATGATCCCTACTTTATTGACCGCAACTTCTGTATTTATTATCGCCTTCATTGCTGCCCCTCCTGTAGATATTGATGGTATTCGTGAACCTGTTTCTGGATCTCTACTTTATGGAAACAATATTATTTCTGGTGCGATTATTCCTACTTCTGCAGCTATAGGTTTGCATTTTTACCCGATATGGGAAGCGGCATCCGTTGATGAATGGTTATACAATGGCGGTCCTTATGAGCTAATTGTTCTACACTTCTTACTTGGTGTAGCTTGTTACATGGGTCGTGAGTGGGAACTT…
Clausena lansium	OL944012	0.543	0.402	51.619	matK	ATGTATCAACGGATTAATTTGAGTATTGCTGCTAATGATTCGAATCAAAATCCAATTTTTGGGCACAACAATAAGTTGTATTCTCAAATTATCTCAGAGGTATTTGCTGCCGTGGTGGAAATTCCATTTTCCCTACGGTTGGTAGCTTTTTTAGAAGGGAAAGAAATTGTAGAAGGGAAAGAAATTGAAAAATCGCCTAATTTCCAATCAATTCATTCAATATTTCCTTTTTTCGAGGATAAATTGTCCCATTTAAATTATGTGTTAGATGTACGAATACCCCACCCCATTTGTCCCGAAATCTTGGTTCAAACCCTTCGCGACTGGGTAAAGGATGCCTCTTCTTTACATTTATTACGGTTCTTTCTCCACGAGTATTTTAATTCGAACAGTCTTATT…
Clausena lansium	OL944012	0.55	0.4348	49.8259	rps16	ATGGTAAAACTTCGTTTGAAACGATGTGGTAGAAAGCAACGAGCCGTTTATCGAATCGTTGCAATTGATGGTCGATCCCGAAGAGAAGGAAGAGATCTTCGGAAAGTGGGTTTTTATGATCCGATAAATAATCAAACCCATTTAAATGTTCCTGCTATTCTATATTTCCTTGCCAAGGGCGCTCAACCTACAGGAACCGTTCATGATATTTCACAGAAAGCGGGGGTTTTTACAGAACTTAGTCTTAATCAAACGAAATTCTATTAA
Clausena lansium	OL944012	0.4118	0.3333	32.9203	psbK	ATGCTTAATATCTTTAGTTTAATGTATATCTGTCTTAATTCTGCCCTTTATTCGAGTAGTTTTTTATTCGCCAAATTACCCGAGGCCTACGCTTTTTTGAATCCAATTGTAGATGTTATGCCAGTAATACCTGTTCTATTTTTTCTCTTAGCCTTTGTTTGGCAAGCTGCTGTAAGTTTTCGATGA
Clausena lansium	OL944012	0.2941	0.45	61	psbI	ATGCTTACTCTCAAACTCTTTGTTTACACCGTAGTGATATTCTTTGTTTCGCTCTTCATCTTCGGATTCCTGTCTAATGATCCAGGGCGTAATCCCGGACGCGAAGAATAA
Clausena lansium	OL944012	0.5238	0.4986	51.0667	atpA	ATGGCAACAATTAAAGCCGACGAAATTAGTAATATTATCCGTGAACGTATTGAGCAATATAATAGAGAAGTAAAGATTGTAAATATTGGGACCGTACTTCAAGTAGGCGACGGCATCGCCCGTATTTATGGTCTTGATGAAGTAATGGCAGGTGAATTAGTAGAATTTGCAGAGGGTACAATAGGCATTGCTCTGAATTTGGAATCAAATAATGTTGGTGTTGTTTTAATGGGTGACGGTTTAATGATACAAGAAGGAAGTTCTGTAAAAGCAACCGGAAAAATTGCTCAGATACCAGTAAGCGAGGCTTATTTAGGTCGTGTTATAAATGCTCTGGCTAAACCTATTGATGGTCGAGGTGAAATTTCAGCTTCTGAATCTAGATTAATTGAATCCCCT…
Clausena lansium	OL944012	0.6167	0.52	53.4554	atpF	ATGAAAAATGTAACCGATTCTTTCGTTTCTTTGGTTAACTGGCCATTCGCCGGGAGTTTCGGGCTTAATACCGATATTTTAGCAACAAATCCAATAAATCTAAGTGTAGTGCTTGGTGTATTGATCTTTTTTGGAAAGGGAGTGTTAAGTGATTTATTAGATAATCGCAAACTGAGGATTTTGAATAGTATTCGAAATTCAGAAGAACTGCAGGGAGGGGCCATTGAACGGCTGGAAAAAGCCCGGGCCCGATTACGAAAAATAGAAATAGAAGCGGATCAGTTTCGAGTGAATGGATACTCTGAGATAGAACGAGAAAAATTCAATTTGATTAATTCAACTTATAAGACTTTGGAGCAATTAGAAAATTACAAAAATGAAACCATTCATTTTGAACAA…
Clausena lansium	OL944012	0.7917	0.3793	59.3551	atpH	ATGAATCCACTGATTTCTGCCGCTTCCGTTATTGCTGCTGGGTTGGCTGTTGGGCTTGCTTCTATTGGACCTGGAGTTGGTCAAGGTACTGCTGCGGGCCAGGCAGTAGAAGGGATCGCGAGACAGCCCGAGGCGGAGGGAAAAATACGAGGTACTTTATTGCTTAGTCTGGCTTTTATGGAAGCTTTAACAATTTATGGGCTGGTTGTAGCATTAGCACTTTTATTTGCGAATCCTTTTGTTTAA
Clausena lansium	OL944012	0.4189	0.4253	52.6042	atpI	ATGAATGTTCTATCATGTTCCATGAACACACTAAAGGGGTTATACGATATATCCGGTGTGGAAGTAGGCCAACATTTCTATTGGCAAATAGGTGGGTTCCAAGTCCATGCCCAAGTACTTATTACTTCTTGGGTTGTAATTGCTATCTTATTAGGTTCAGCCTTTATAGCCGTTCGTAATCCACAAACCGTTCCGACTGCCACTCAAAATTTCTTCGAATATGTCCTTGAATTCATTCGAGACGTGAGCAAAACTCAGATTGGAGAAGAATATGGCCCATGGGTTCCCTTTATTGGAACTCTGTTTCTTTTTATTTTTGTTTCTAATTGGTCAGGTGCTCTTTTACCTTGGAAACTCATAGAGTTACCTCATGGGGAGTTAGCCGCACCCACGAATGAT…
Clausena lansium	OL944012	0.5714	0.4562	60.7093	rps2	ATGGCAAGAAGGTATTGGAACATCCATTTGGAAGAGATGATGGAAGCAGGAATTCATTTTGGTCATGGTACTCGGAAATGGAATCCTAGAATGGCACCTTATATATCTGCAAAACATAAAGGTATTCATATTACAAATCTGACTCGAACTGCTCGGTTTTTATCAGAAGCTTGTGATTTAGTTTTTGATGCAGCAAGTAGGGGAAAACAATTCTTAATTGTTGGTACTAAAAATAAAGCGGCCGATTTAGTCGCGCGAGCTGCAATAAGGGCTCGGTGCCATTATGTTAATCAAAAATGGCTCGGCGGTATGTTAACCAATTGGTCCACTACAGAAACGCGACTTCACAAGTTCAGGGATTTGAGAACGGAACAAAAGGGGGGGCGACTCGACAGTCTT…
Clausena lansium	OL944012	0.5736	0.47	52.7906	rpoC2	ATGGCAGAACGGGTGAGTCTGGTCTTTCACAATAAAATGATAGATGGAACTGCCATTAAACGACTTATTAGCAGGTTAATAGATCATTTCGGAATGGCATATACATCACACATCCTGGATCAAGTAAAGACCCTGGGGTTCCAGCAAGCCACTGCTACATCTATTTCATTAGGCATTGATGATCTTTTAACGATACCTTCTAAGCGATGGCTAGTCCAAGATGCTGAACAACAAAGTTTTATTTTGGAAAAACACTATCATTATGGGAATGTACACGCGATAGAAAAACTACGGCAATCCATTGAGATATGGTATGCTACAAGTGAATATTTGCGACAAGAAATGAATCCTAATTTTAGGATGACTGAACCTTTTAATCCAGTCCATATAATGTCTTTT…
Clausena lansium	OL944012	0.5771	0.4657	51.0319	rpoC1	ATGATTGATCGATATAAACATCAACAACTCCGAATTGGATCAGTTTCTCCTCAACAAATAAGCGCTTGGGCCAATAAAATCCTACCTAATGGAGAGATAATTGGAGAAGTGGCAAAACCCTATACTTTTCATTACAAAACCAATAAACCGGAAAAAGATGGATTATTTTGTGAAAGAATTTTTGGGCCTATTAAAAGTGGAATTTGTGCTTGTGGAAATTATCGAATAATCGGAGATGAAAAAGAAGACCCGCGATTTTGTGAACAATGTGGGGTTGAATTTGTTGATTCTCGGATACGAAGATATCAAATGGGATACATAAAACTGGGATGCCCAGTAACCCACGTGTGGTATTTGAAACGTCTTCCTAGTTATATCGCGAATCTTTTAGATAAACCT…
Clausena lansium	OL944012	0.6074	0.4913	50.8631	rpoB	ATGCTCGGAGATGGAAATGCGGGAATGTCTACAATACCTGGGTTGAATCAGATCCAATTTGAAGGATTTTGTAGGTTCATTGATCAGGGCTTAACAGAAGAGCTTTATAAGTTTCCAAAAATTGAAGATACAGATCAAGAAATTGAATTTCAATTATTTGTGGAAACATATCAATTGGTAGAACCCTTGCTAAACGAAAGAGATGCTGTATATGAATCATTCACGTATTCTTCTGAATTATATGTATCCGCAGGATTAATTTGGAAAAGCCGAGGGGATATGCAGGAACAAACTATTTTTATTGGAAACATTCCTCTAATGAATTCTTTGGGAACTTCTATAGTAAACGGAATATACAGAATTGTCATCAATCAAATATTGCAAAGTCCCGGTATCTAT…
Clausena lansium	OL944012	0.6	0.55	61	petN	ATGGATATAGTAAGTCTAGCTTGGGCTGCTTTAATGGTAGTCTTTACATTTTCCCTTTCGCTCGTAGTATGGGGAAGAAGTGGACTCTAG
Clausena lansium	OL944012	0.5556	0.4231	45.1818	psbM	ATGGAAGTAAATATTCTCGCATTTATTGCTACTACACTGTTCGTTCTAGTTCCTACTGCGTTTTTGCTTATAATATACGTAAAAACGGTCAGTCAAAGTGATTAA
Clausena lansium	OL944012	0.4435	0.3739	51.6916	psbD	ATGACTATAGCCCTTGGTAAATTTACCAAAGAGGAAAAGGATTTATTTGATATTATGGATGACTGGTTACGGAGGGACCGATTCGTTTTTGTAGGTTGGTCTGGCCTATTGCTCTTTCCTTGTGCCTATTTCGCTTTAGGGGGTTGGTTCACAGGCACAACCTTTGTAACTTCATGGTATACCCATGGATTAGCCAGTTCCTATTTGGAAGGCTGCAACTTCTTAACCGCCGCAGTTTCGACTCCTGCTAATAGTTTAGCGCATTCTTTGTTGTTACTATGGGGTCCTGAAGCACAAGGAGATTTTACTCGCTGGTGTCAATTAGGCGGTCTTTGGACTTTTGTTGCTCTCCACGGTGCTTTCGGACTAATAGGTTTCATGTTACGTCAATTTGAACTT…
Clausena lansium	OL944012	0.4904	0.3912	51.0354	psbC	ATGAAAACCTTATATTCCCTGAGGAGGTTCTACCCCGTGGAAACGCTCTTTAATGGAACTTTAGCTGTAGCAGGTCGTGACCAAGAAACCACCGGTTTCGCTTGGTGGGCCGGGAATGCCCGACTTATCAATTTATCCGGTAAACTGCTGGGCGCTCATGTAGCCCATGCTGGATTAATCGTATTCTGGGCCGGAGCAATGAACCTATTTGAAGTGGCTCATTTCGTACCCGAAAAGCCCATGTATGAACAAGGATTAATTTTACTTCCCCACCTAGCTACTCTAGGCTGGGGGGTAGGTCCTGGTGGGGAAGTTATAGACACCTTTCCATACTTTGTATCTGGAGTACTTCACTTAATTTCCTCTGCAGTATTGGGCTTTGGCGGTATTTATCATGCA…
Clausena lansium	OL944012	0.5263	0.3409	52.7462	psbZ	ATGACTATTGCTTTCCAATTGGCTGTTTTTGCATTAATTGCTACTTCATCAATCTTACTGATTAGTGTACCCGTTGTATTTGCTTCTCCGGATGGTTGGTCGAGTAACAAAAATGTCGTATTTTCTGGTACATCATTGTGGATTGGATTAGTCTTTCTGGTGGGTATCCTTAACTCTCTCATTTCTTAA
Clausena lansium	OL944012	0.6944	0.5538	43.9762	rps14	ATGGCAAGGCAAAGTTTGATTCAGAGGGAAAAGAAAAGGCACAAATTGGAACAAAAATATCATTTGATTCGTCGATCCTCAAAAAAAGAAATAAACAAAGTTCCATCGTTGAGCGATAAATGGAAAATTCATGGAAAGTTACAATCCTCACCGCGTAATAGTGCACCTACCCGTCTTCATCGACGTTGTTTTTTGACCGGAAGGCCGAGAGCTACCTATCGGGACTTTGGACTATCCGGACACATACTTCGTGAAATGGTTCATGCGTGTTTGTTGCCGGGGGCAACAAGATCAAGTTGGTAA
Clausena lansium	OL944012	0.5692	0.3672	52.4364	psaB	ATGGCATTAAGATTTCCAAGGTTTAGCCAAGGCTTAGCTCAGGACCCCACTACTCGTCGTATTTGGTTTGGTATTGCTACCGCACATGACTTCGAGAGTCATGATGATATTACTGAGGAACGTCTTTATCAGAATATTTTTGCTTCTCACTTCGGGCAATTAGCAATAATTTTTCTGTGGACTTCCGGAAATCTCTTTCATGTAGCTTGGCAAGGAAATTTTGAGGCATGGGTACAGGACCCTTTACATGTAAGACCTATTGCTCATGCAATTTGGGATCCTCATTTTGGTCAACCGGCCGTGGAAGCTTTTTCTCGGGGAGGTGCTCTTGGCCCGGTGAATATTGCTTATTCTGGTGTTTATCAGTGGTGGTATACAATCGGTTTACGCACTAATGAG…
Clausena lansium	OL944012	0.5075	0.4268	52.2242	psaA	ATGATTATTCGTTCGCCGGAACCAGAAGTAAAAATTTTGGTAGATAGGGATCCCGTAAAAACTTCTTTCGAGGAATGGGCCAAACCGGGGCATTTCTCAAGAACCATAGCTAAGGGACCTGAGACTACCACTTGGATCTGGAACCTACATGCTGATGCTCACGACTTCGATAGCCATACCAGCGATTTGGAGGAGATCTCTCGAAAAGTATTTAGTGCCCATTTCGGACAACTCTCCATCATTTTTCTTTGGCTGAGCGGCATGTATTTCCACGGTGCTCGTTTTTCCAATTATGAAGCCTGGCTAAGCGATCCTACTCACATTGGACCTAGCGCACAGGTGGTTTGGCCAATAGTGGGCCAAGAAATATTGAACGGTGATGTGGGCGGGGGTTTCCGA…
Clausena lansium	OL944012	0.5818	0.4649	49.0757	ycf3	ATGCCTAGATCGCGGATAAACGGAAATTTTATTGATAAGACCTTTTCGATTGTAGCCAATATATTATTACGAATAATTCCGACAACTGTAGGAGAAAAAGAGGCATTTACCTATTACAGAGATGGGATGTCAGCTCAATCTGAAGGCAATTATGCGGAAGCTTTACAGAATTATTATGAAGCTATGCGACTAGAAATTGATCCCTACGATCGAAGCTATATACTCTATAACATAGGCCTTATCCACACAAGTAACGGAGAACATACAAAAGCTTTAGAATATTATTTTCGGGCACTAGAACGAAATCCGTTCTTACCACAAGCTTTTAATAATATGGCTGTGATCTGTCATTACCGGGGGGAACAGGCCGTTCGACAGGGAGATTCTGAAATTGCGGAG…
Clausena lansium	OL944012	0.5091	0.4966	60.6203	rps4	ATGTCACGTTACCGAGGGCCTCGTTTCAAAAAAATACGCCGTCTGGGGGCTTTGCCGGGACTAACGAGTAAAAGGCCTAGAGCCGGAAGCGATTTTAGAAACCAATCGCGCTCCGTAAAAAAATCTCAATATCGAATTCGTTTAGAAGAAAAACAAAAATTGCGTTTTCATTATGGTCTTACAGAACGACAATTACTTAAATATGTTCGTATCGCCGGAAAAGCCAAAGGGTCAACCGGTCTGGTTTTACTACAATTACTTGAAATGCGTTTGGATAACATTCTTTTTCGGTTGGGTATGGCTTCAACTATTCCTCAAGCCCGCCAATTGGTTAACCATCGACATATTTTAGTTAATGGTCGTATAGTCGATATACCAAGTTATCGTTGCAAACCCCGA…
Clausena lansium	OL944012	0.64	0.4128	52.7169	ndhJ	ATGCCGGGTCGTTTGTCTGCTTGGCTGGTCAAGCATGGGCTAGTTCATAGATCTTTGGGCTTCGATTACCAAGGAATAGAAACTTTACAAATAAAGCCCGAGGATTGGCACTCTGTTGCTGTCATTTTGTATATATATGGTTACAATTATCTACGTTCCCAATGTGCCTATGATGTAGCACCGGGTGGACTGTTAGCCAGTGTGTATCATCTTACGCGAATAGAGTATGGTGTAGATCAACCAGAAGAGGTATGCATAAAAGTATTTGCTCCAAGGAGTAATCCTAAAATTCCATCGGTTTTCTGGGTTTGGAAAAGTGCGAATTTTCAAGAACGGGAATCTTATGATATGCTGGGAATCCTTTATGATAATCATCCACGACTGAAACGTATCTTAATG…
Clausena lansium	OL944012	0.5373	0.4596	58.2144	ndhK	ATGAATTCTATTGAATTTTCCTTACTTGATCGAACAACCCCAAATTCATTTATTTCAACTACATCAAACGATCTTTCAAATTGGTCAAGACTCTCCAGCTTATGGCCGCTTCTTTATGGTACCAGTTGTTGTTTCATTGAATTTGCTTCATTAATCGGCTCGCGGTTCGATTTTGACCGTTATGGGCTGGTACCAAGATCGAGCCCTAGACAGGCGGACCTAATTTTAACAGCAGGTACAGTAACAATGAAAATGGCTCCTTCTTTAGTGAGATTATATGAACAAATGCCTGAACCAAAATATGTTATTGCTATGGGAGCATGTACAATTACAGGGGGGATGTTCAGTACCGATTCGTATAGTACTGTTCGAGGAGTTGATAAGCTAATTCCCGTGGAT…
Clausena lansium	OL944012	0.6216	0.4048	50.1393	ndhC	ATGTTTCTGCTTTACAAATATGATATTTTCTGGGCATTTCTAATAATATCAAGTATTATTCCTATTTTGGCATTTCTAATTTCCGCAGTTTTAGCCCCGATTAACAAAGGGCCAGAGAAACTTTCTAGTTATGAATCGGGTATCGAACCAATGGGCGATGCTTGGTTACAATTTCGAATCCGGTATTATATGTTTGCTCTAGTTTTTGTTGTTTTTGATGTTGAAACCGTTTTTCTTTATCCATGGGCAATGAGTTTTGATGTATTGGGGGTACCCGTATTTATAGAAGCTTTCATGTTCATGCTTATCCTAATTGTTGGTTTAGTTTATGCGTGGCGCAAAGGAGCATTAGAGTGGTCTTAG
Clausena lansium	OL944012	0.6053	0.4792	57.0987	atpE	ATGACCTTAAATCTTTGTGTACTGACTCCTAATCGAATTGTTTGGGATTCAGAAGTGAAAGAAATCATTTTATCTACTAATAGTGGACAAATAGGCGTATTACCAAATCACGCGCCTATTGCCACAGCTGTAGATATAGGTATTTTAAGAATCCGCTTTAACGACCAATGGTTAACGATGGCTCTGATGGGTGGTTTTGCTAGAATAGGGAATAATGAGATCACTATTTTAGTAAATGATGCGGAGAAGAGTAGTGACATTGATCCCCAAGAAGCCCAGCAAACTCTTGAAATAGCAGAAGCTAATTTGAGGAAAGCTGAAAGCAAGAGACAAACAATTGAGGCAAATCTAGCTCTCAGACGAGCTAGGACACGAGTAGAGGTTATTAATGCGATTTCA…
Clausena lansium	OL944012	0.5094	0.4676	51.3459	atpB	ATGAGAATAAATCCTACTACTTCCGGTCCTGGGGTTTCCGCGCTTGCAAACAAAAACCTAGGACATATCGCTCAAATCATTGGTCCGGTACTGGATGTAGCCTTTCCCCCCGGCAAGATGCCTAATATTTACAATGCTCTGGTAGTTAAGGGTCGAGATACTGTCGATCAACCAATTAATGTGACTTGCGAGGTACAGCAATTATTAGGGAATAATCGAGTTAGAGCTGTAGCCATGAGTGCTACAGATGGTCTAACGAGGGGTATGGAAGTAATTGACACGGGAGCTCCTCTAAGTGTTCCAGTCGGCGGAGCGACTCTAGGACGAATTTTCAACGTGCTTGGAGAGCCTATTGATAATTTAGGTCCTGTAGATACTCGCACAACATCCCCTATTCAT…
Clausena lansium	OL944012	0.519	0.4057	51.6559	rbcL	ATGTCACCACAAACAGAGACTAAAGCGAGTGTTGGATTCAAGGCCGGTGTTAAAGATTATAAATTGACTTATTATACTCCTGACTATGTAACCAAAGATACTGATATCTTGGCAGCATTCCGAGTAACTCCTCAGCCCGGAGTTCCACCCGAGGAAGCGGGGGCTGCGGTAGCTGCGGAATCTTCTACTGGTACCTGGACAACTGTGTGGACCGATGGGCTTACCAGCCTTGATCGTTACAAAGGGCGATGCTACAACATTGAGCCCGTTGCTGGAGAAGAGAATCAATATATATGTTATGTAGCTTACCCGTTAGACCTTTTTGAAGAAGGTTCTGTTACTAACATGTTTACTTCCATTGTGGGTAATGTATTTGGTTTCAAAGCACTGCGCGCTCTA…
Clausena lansium	OL944012	0.5306	0.3613	47.1303	accD	ATGAAAAAATGGTGGTTCAGGTTCAATTCGATGTTATCTAAGGGTAAGGGGGAATTAGAATTAGAATACAGGTGTTGGTTAAGTAAATCCATGGAGAGCCCTGGTCCTATTAAAAATCCCAGTGTAAGCGAGGAACTGATTAGAAATGATAAGGATAAAAACATTCATAGTTCGAGTGATAGTGACAGTTCAAGTTACAGCAAATTAGCTGGTGTCAGGGACATTCATAATTTCATCTCGGATGACACTTTTTTTGTTAAGGATAGTAATAGGAACAGTTATTCCATCTATTTTGATATTGAAAATAAAATTTTGGAACTAGACAATGCTCATTCTTTTCTGAGTGAACTAGAAAGTTCTTTTTATAGCTTTCGTAATTATAGTTCGAGGAATAATGGA…
Clausena lansium	OL944012	0.6429	0.4167	61	psaI	ATGACAATTCTCAACAGCTTTCCCTCTATTTTTGTGCCTTTAGTGGGCCTAGTATTTCCGGCAATGGCAATGGCTTCGTTATTTCTTTATCTTGAAAAAAATAAGATTTTGTAA
Clausena lansium	OL944012	0.5538	0.425	61	ycf4	ATGAGTTGGCGATCAGAATATATATGGATAGAATTTATAGCGGGCTCTCGCAAACCAGGCAGTTTCTTCTGGGCCTTTATCCTTTTTTTAGGCTCATTAGGATTCTTAGTGGTTGGAATTTCTAGTTATCTTGATAGGAATTTGCTATCTTTATTTCCGGCGCAGCAAATAAATTTTTTTCCACAAGGGATCGTGATGTCTTTCTACGGGATCGCGGGTCTCTTTATTAGTTCCTATTTGTGGTGCACAATTACATGGAATGTAGGTAGCGGTTATGATCGATTTGATACAAAAGAGGGAATAGTGTGTATTTTTCGTTGGGGATTTCCTGGAAAAAATCGTCGCATCTTTCTACGATTCCTTCTGAAAGATATTCAGTCCATCAGACTAGAAGTTAAA…
Clausena lansium	OL944012	0.4675	0.4051	60.7233	cemA	ATGACAAAAAAGAACGCATCCATTCCCCTTAGATATCTTTCATCTATAGTATTTGTAGTATTTTTGCCCTGGTGGATCCCTCTCTCATTTAATAAAAGTCTGGAATCCTGGGTTACTAATTGGCGGAATACTAGTCAATCCGAAACCTTTTTGAATGATATTCAAGAAAAGGCTATTCTAGAAAAATTCATAGAATTAGAGGAATTATTCCTCTTGGACGAAATGATAAAGGACTTTCCGGAACGACGTCTAGAAAAGCTTCATATAGGGCTCCAGAAAGAAACAATCCAATTAATCAAGATGCACGATGAGGATCATATCCATACGGTTTTTCACTTCTCGACAAATACAATCTGCTTCGTTATTCTAAGTGGTTATTCTATTCTGTGTAATGAAGAA…
Clausena lansium	OL944012	0.5514	0.4626	59.2126	petA	ATGCAAATTAGAAATACCTTTTCTTCGTTAAAGGGAGAGATTACTCGATTCATTTCCGTATCCCTCATGATATATATAATAACTCGGGCATCAATTTCAAATGCATATCCCATTTTTGCGCAGCAGGGTTTTGAAAATCCACGAGAAGCAACTGGTCGTATTGTATGCGCCAATTGCCATTTAGCTAATAAGCCCGTGGATATTGAGGTTCCACAGGCGGTACTCCCCGATACTGTATTTGAAGCAGTTGTTAGAATTCCTTATGATATGCAACTGAAACAAGTTCTTGCTAATGGTAAAAAGGGGGCTTTGAATGTGGGGGCCGTTCTTATTTTACCAGAGGGGTTTGAATTAGCCCCCCCCGATCGTATTTCGCCCGAGATGAAAGAAAAGATAGGC…
Clausena lansium	OL944012	0.5	0.3704	23.2532	psbJ	ATGGCCGATACTACTGGAAGGATTCCCCTTTGGATAATAGGAACTGTAACTGGTATTCCTGTGATCGGTTTAATAGGCATTTTCTTTTATGGTTCATATTCCGGATTAGGTTCGTCCTTGTAG
Clausena lansium	OL944012	0.2667	0.5	61	psbL	ATGACACAATCAAACCCAAACGAACAAAATGTTGAATTGAACCGTACCAGTCTCTACTGGGGGTTATTACTCATTTTTGTACTTGCTGTTTTATTTTCCAATTACTTCTTCAATTAA
Clausena lansium	OL944012	0.5714	0.5769	55.2727	psbF	ATGACCATAGATCGAACCTATCCAATTTTTACAGTGCGATGGTTGGCTGTTCACGGACTAGCTGTACCTACCGTTTCTTTTTTGGGGTCAATATCAGCAATGCAGTTCATCCAACGATAA
Clausena lansium	OL944012	0.4194	0.3962	60.1481	psbE	ATGTCTGGAAGCACAGGAGAACGTTCTTTTGCTGATATTATTACCAGTATTCGATACTGGGTCATTCATAGCATTACTATACCTTCCCTATTCATTGCGGGTTGGTTATTCGTCAGCACGGGGTTAGCTTACGATGTGTTTGGAAGCCCCCGGCCAAACGAGTATTTTACAGAGAGCCGGCAAGGAATTCCATTAATAACCGGCCGTTTTGATTCTTTGGAACAACTCAATGAATTTAGTAGATCTTTTTAG
Clausena lansium	OL944012	0.8333	0.3462	54.6842	petL	ATGCCTACTATAACTAGTTATTTTGGTTTTCTACTAGCGGCTTTAACTATAACCTCGGCTCTATTTATTGGTCTGAGTAAGATAGGACTTATTTGA
Clausena lansium	OL944012	0.3333	0.4615	61	petG	ATGATTGAAGTCTTTCTATTTGGAATCGTCTTAGGTCTAATTCCTATTACTTTGGCTGGATTATTCGTAACCGCCTATTTACAATACAGACGTGGTGATCAGTTGGACCTTTGA
Clausena lansium	OL944012	0.5294	0.6071	61	psaJ	ATGCGAGATCTAAAAACATATCTTTCCGTGGCACCGGTACTAAGTACTCTATGGTTCGGGTCTTTAGCAGGGTTATTGATAGAAATCAACCGTTTATTCCCCGACGCATTGACATTTCCTTTTTTTTCATTCTAG
Clausena lansium	OL944012	0.6087	0.4318	36.107	rpl33	ATGGCCAAGGGTAAAGAGGTCCGAGTAAGGGTTATTTTGGAATGTACTAGTTGTGTTCGAAACGGTGTTAATAAGGAATCAAGGGGTATTTCCAGATATATTACTCAAAAGAATCGACACAATACACCCAGTCGATTGGAATTGAGAAAATTCTGTCCCTATTGTTACAAGTATACACTTCATGGGGAGATAAAAAAATAG
Clausena lansium	OL944012	0.6296	0.4933	47.8279	rps18	ATGGATAAAACCAAGCGACTCTTTCTTAAATCCAAGCGATCTTTTCGTAGGCGTTTGCCCCCGATCCAATCGGGGGATCGAATTGATTATAGAAACATGACTTTAATTAGTCGATTTCTTAGTGAACAAGGAAAAATATTATCTAGACGGGTGAATAGATTGACCTTAAAAGAACAACGATTAATTACTATTGCTATAAAACAAGCTCGTATTTTATCTTCGTTACCTTTTCTTAATAATGAGAAACAATTTGAAAGAAGTGGGTTGACCGCTAGACCTCCCGGTCTTCGAACCAGAAAAAAATAG
Clausena lansium	OL944012	0.6562	0.4767	61	rpl20	ATGACCAGAATTAGACGAGGATATATAGCTCGGAGACGTAGAACAAAAATGCGTTTATTTGTATCAAGCTTTCGCGGGGCTCATTCACGACTTAGCCGAACAATTACTCAACAGAAAATAAGAGCTTTGGTTTCGGCTCATCGCGATAGAGATAGGAAAAAAAGGGATTTTCGTCGTTTGTGGATCACCCGAATAAATGCAGTAATTCGCGAAATTCGGGTATCCTATAGTTATAGTAGATTAATATACAATCTGTATAAGGCGCAGCTGGTTCTTAATCGTAAGATACTTGCACAAATAGCTATATCAAATAGGAATTGTCTTTATATGATTTCCAATGAGATTATAAAATAA
Clausena lansium	OL944012	0.3934	0.4746	61	rps12	CTACAACGCACTAGAACGCCCTTGTTGACGATCCTTTACTCCGACAGCATCTAGGGTTCCTCGAACAATGTGATATCTCACACCGGGTAAATCCTTAACCCTCCCCCCTCTTACTAAGACTACAGAATGTTCTTGTGAATTATGGCCAATACCAGGTATATAAGCAGTGATTTCAAACCCAGAGGTTAATCGTACTCTGGCAACTTTACGTAAGGCAGAGTTTGGTTTTTTGGGGGTGATAGTATGCCAACTATTAAACAACTTATTAGAAACCCAAGACAGCCAATCAGAAACGTTACCAAATCCCCCGCTCTGCGGGGATGCCCTCAGCGCCGAGGAACATGTACAAGGGTGTATGTG
Clausena lansium	OL944012	0.5556	0.4948	61	clpP	ATGGTTGAGAGCGATATCTCGAATCAACTTATTGGTATTATGGTATATCTCAGTATAGAGAACGAGACCAAGGATTTGTATTTATTTATCAACTCTCCTGGCGGATGGGTAATACCGGGGATAGCTATTTATGATACTATGCAATTTGTGCGACCCGATGTACAGACAATATGCATGGGATTGGCCGCCTCCATGGGGTCTTTTCTACTGGCCGCAGGAGCAAGTACCAAACGTCTAGCATTCCCTCACGCTTGGGTCATGATCCATCAACCTATTGGCGCTTTTTATGGGGCACAAACGGGAGAATTTATCCTGGATACGGAAGAACTACTGAGACTGCGCGAAATCCTTACAATGGTTTATGTACAAAGATCGGGCAAGCCCTTATGGGTTGTATCC…
Clausena lansium	OL944012	0.5217	0.4167	50.9039	psbB	ATGGGTTTGCCTTGGTATCGTGTTCATACCGTCGTATTGAATGATCCCGGTCGTTTGATTGCTGTCCATATAATGCATACAGCCCTGGTTGCGGGTTGGGCCGGTTCAATGGCTCTATATGAATTAGCTGTTTTTGATCCCTCCGATCCAGTTCTTGATCCAATGTGGAGACAAGGCATGTTCGTTATACCCTTCATGACTCGTTTAGGAATAACCGATTCATGGGGTGGTTGGAGTATTACAGGGGGGACGGTAACGAATCCGGGTATTTGGAGTTACGAAGGTGTAGCGGGGGCACATATTGTGTTTTCCGGCTTGTGCTTCTTGGCAGCTATCTGGCATTGGGTGTATTGGGATCTAGCAATATTTGTTGATGACCGTACAGGAAAACGTTCTTTG…
Clausena lansium	OL944012	0.4545	0.56	43.1429	psbT	ATGGAAGCATTGGTTTATACATTCCTCTTAGTCTCGACTCTAGGGATCATTTTTTTCGCTATCTTTTTTCGAGAACCGCCTAAAGTTCCAACTAAAAAAACAAAATGA
Clausena lansium	OL944012	0.3889	0.5769	61	psbN	ATGGAAACAGCAACCCTAGTCGCCATCTCTATATCTGGGTTACTTGTAAGTTTTACTGGGTACGCCTTATATACCGCTTTTGGGCAACCCTCTCAACAACTAAGAGATCCATTCGAGGAACACGGGGACTAG
Clausena lansium	OL944012	0.7917	0.42	58.8711	psbH	ATGGCTGCACAAACAGTTGAGGGTAGTTCTAGAGCTCGTCCAAAAAGAACTTCTGCAGGGGGGTTGTTGAAACCCTTGAATTCGGAATATGGTAAAGTAGCTCCTGGATGGGGAACTACTCCTTTGATGGGTGTCGCAATGGCTTTATTTGCGGTATTCCTATGTATTATTTTGGAGATTTATAATTCGTCCGTTTTACTGGACGGAATTTCACTGAATTAG
Clausena lansium	OL944012	0.5529	0.4257	59.5421	petB	ATGAAATTCTCATATACGGTTCTCAGAGGGGAGTTCTCTTGGTTTACCTATCTCAATAAAGTCTACGATTGGTTCGAAGAACGTCTCGAGATTCAGGCGATTGCAGATGATATAACTAGTAAATACGTTCCTCCTCATGTCAACATATTTTATTGTCTGGGAGGAATTACGCTCACTTGTTTTTTAGTACAAGTAGCTACAGGGTTTGCTATGACTTTTTACTACCGCCCGACCGTTACTGAGGCTTTTGCCTCCGTTCAATACATAATGACGGAAGTTAACTTCGGGTGGTTAATTCGATCGGTTCATCGATGGTCGGCAAGTATGATGGTCCTAATGATAATCCTGCACGTATTTCGTGTGTATCTCACCGGGGGTTTTAAAAAACCTCGCGAATTG…
Clausena lansium	OL944012	0.5111	0.4912	45.4547	petD	ATAACAAAAAAACCTGACTTGAATGATCCTGTATTAAGGGCTAAGTTGGCTAAGGGTATGGGTCATAATTATTATGGAGAACCCGCATGGCCCAACGATCTTTTATATATTTTTCCAGTAGTAATTCTAGGTACTATTGCATGTAACGTAGGCTTAGCGGTTCTAGAACCATCAATGATTGGTGAACCCGCAGATCCGTTTGCAACTCCTTTGGAAATCTTACCCGAATGGTATTTCTTTCCCGTATTTCAAATACTTCGTACAGTACCCAATAAGCTGTTGGGTGTTCTTTTAATGGTTTCAGTACCTACGGGATTATTAACAGTACCTTTTTTGGAAAATGTTAATAAATTCCAAAATCCATTTCGCCGCCCCGTAGCGACAACCGTCTTTTTGATT…
Clausena lansium	OL944012	0.549	0.4802	55.0851	rpoA	ATGGTTCGAGAGAAAGTAAAAGTATCTACTCGGACACTGCATTGGAAGTGTGTTGAATCAAGAGCAGACAGTAAGCGTCTTTATTATGGGCGCTTTATTTTGTCTCCACTTATGAAAGGTCAAGCCGACACAATAGGCATTGCGATGCGAAGAGTTTTGCTTGGAGAAATAGAAGGAACATGTATTACACGCGCAAAATCTGAGAAAATCCCACACGAATATTCTACCATAGTGGGTATTCAAGAATCGGTACATGAAATTTTAATGAATTTGAAAGATATTGTATTGAGAAGTAATCTTTATGGAACTTGTGACGCTCTTATTTGTGTCAAAGGCCCGGGATATGTAACTGCTCAAGACATCCTCTTGCCGCCTTCTGTGGAAATCGTTGATAATACG…
Clausena lansium	OL944012	0.525	0.4949	61	rps11	ATGGCAAAATCTCCACCAAGAAGTGGTTCACGTAGGCCGGGACGGATTGGTTCACGTAAAAGTGGACGTCGAATACCAAAGGGCGTTATTCATGTTCAAGCAAGTTTCAACAACACCATTGTGACTGTTACAGATGTCCGGGGTCGGGTAATTTCTTGGTCCTCGGCCGGTACTTGTGGATTCAGGGGTACAAGAAGAGGTACACCTTTTGCTGCTCAAACCGCAGCAGGAAATGCTATTCGAGCAGTAGCGGATCAAGGTATGCAACGAGCAGAAGTCATGATAAAGGGTCCTGGTCTCGGAAGAGATGCGGCATTACGAGCTATTCGTAGAAGCGGTATCCTTTTAAATTTCGTACGGGATGTAACCCCTATGCCACACAATGGTTGCAGACCCCCT…
Clausena lansium	OL944012	0.6364	0.6296	46.75	rpl36	ATGAAAATAAGGGCTTCAGTTCGTAAAATTTGTGAAAAATGTCGACTGATCCGCAGGAGGGGACGGATTATAGTAATTTGTTCCAACCCGAGACATAAACAAAGACAAGGATAA
Clausena lansium	OL944012	0.5227	0.5165	42.2419	rps8	ATGGGCAAGGACACTATTGCTGACATAATAACTTCTATACGAAATGCTGACATGAATAGAAAGGGAACGGTTCGAATAGCATCTACTAACATCACCGAAAACGTTGTTAAAATACTTTTGCGAGAGGGTTTTATCGAAAACGCAAGGAAACTCATGGAAAACGAAAAAGAGTTTTTGGTTTTAACCCTACGACATCGAAGGAATAGGAAAGGGCCGTATAGACCCATTTTAAATTTAAAACGAATCAGTCGACCCGGTCTACGAATCTATTTTAACTATCGACGAATTCCTAGAATTTTAGATGGGATGGGGGTTGTAATTCTCTCTACTTCTCGGGGTATAATGACAGACCGAGCGGCTCGACTAGAAAGAATCGGTGGAGAAATTTTGTGTTATATT…
Clausena lansium	OL944012	0.4848	0.4889	51.8877	rpl14	ATGATTCAACCTCAAACCCATTTGAATGTAGCAGACAATAGCGGTGCCCGAGAATTGATGTGTATTCGAATCATAGGAGCCAGTAATCGTAGATATGCTCATATTGGTGACGTTATTGTTGCTGTGATCAAGGAAGCAGTACCCAATACGCCTCTAGAAAGATCAGAAGTGATCAGAGCTGTAATTGTACGTACTTGTAAAGAACTCAGACGTGATAACGGTATGATAATACGGTACGATGACAATGCTGCAGTTGTCATTGATCAAGAAGGAAATCCAAAGGGAACTCGAGTTTTTGGTGCGATCGCCCGGGAATTGAGACAGTTGAATTTTACTAAAATAGTTTCATTAGCACCTGAAGTATTATAA
Clausena lansium	OL944012	0.4651	0.5851	39.8077	rpl16	ATCAATTATAACCCCAAAAGAACAAGATTCCGTAAACAACATAGAGGAAGAATGAAAGGGATATCTTATCGAGGTAATCATATTTGTTTCGGCAGATATGCTCTTCAAGCACTTGAACCCGCTTGGATCACATCTAGACAAATCGAAGCGGGGCGCCGAGCAATGACACGAAATGTACGGCGCGGTGGAAAAATATGGGTACGTATCTTTCCAGACAAACCCGTTACAGTAAGACCCACGGAAACCCGTATGGGGTCCGGTAAAGGATCCCCCGAATATTGGGTAGCCGTCGTTAAACCGGGTAGAATACTTTATGAAATGAGTGGAGTAGCTGAAAATATAGCTCGAAAGGCTATTTCAATAGCGGCGTCCAAAATGCCTATAAGAACTCAATTCATT…
Clausena lansium	OL944012	0.4792	0.5872	43.9982	rps3	ATGGGACAAAAAATAAATCCACTAGGTTTCCGGCTTGGTACAACACAAGGTCATCATTCTCTTTGGTTTGCAAAACCAAAAAACTATTGCGAGGGTCTACAAGAAGATCAAAAAATACGAAACTTTATTCAGAATTATGTACAAAAAAATATGAGAATATCCTCCGGTGTTGAGGGAATTGCACGGATAGAGATTCAAAAAAGAATTGATCTAATTCAAGTTATAATCTATATAGGGTTCCCAAAATTATTACTAGAAAATAGACCGCGAAGAATTGAAGAATTACAGATGAATGTACAAAAAGAACTTAATTGTGTGAATCGAAAAATAAACATTGCTATTACAAGAATTGCAAATCCTTATGGACACCCCAATATTCTTGCCGAATTTATAGCCGGC…
Clausena lansium	OL944012	0.48	0.5667	56.4918	rpl22	ATGAAAGTCGAAGTAAACGAGGGTCCTACTGCGAAAAGATTAAAACCTCGAGCTCGAGGGCGGAGTTACCTGATCAAAAAACCCACTTGTCATATAACTATTGTTTTAAAAGATATATCCTTAGCTGAATATGAATATAGAGACTATCTCGATCTCGAGTGCTCAAAAAACACTAGATTAATAAATAAAAAAAAGAACAAAACTATGACATGTCATGATACATATAGGAATGGGGGATTATGGGACAAAAAATAA
Clausena lansium	OL944012	0.5417	0.4928	49.7899	rps19	GTGACACGTTCACTAAAAAAAAATCCTTTTGTAGCGAATCATTTATTAAGAAAAATCGATAAGCTTAATACAAAAGCGGAAAAAGAAATAATAATAACTTGGTCCCGGGCATCTACCATTATACCCACAATGGTCGGCCATACTATTGCTATCCATAATGGAAGGGAGCATTTGCCTATTTATATAACAGATCGTATGGTAGGACATAAATTGGGAGAATTTGCGCCCACTATCAATTTCCGTGGACATGCAAAAAATGATAATAGATCCCGTCGTTAA
Clausena lansium	OL944012	0.4945	0.5054	55.29	rpl2	ATGGCGATACATTTATACAAAACTTCTACCCCGAGCACACGCAATGGAGCCGTAGACAGTCAAGTGAAATCCAATCCACGAAATAATTTGATCTATGGACAGCATCGTTGTGGTAAAGGTCGTAATGCCAGAGGAATCATTACCGCAGGGCATAGAGGGGGAGGTCATAAGCGTCTATACCGTAAAATCGATTTTCGACGGAATGAAAAAGACATATATGGTAGAATCGTAACCATAGAATACGACCCTAATCGAAATGCATACATTTGTCTCATACACTATGGGGATGGTGAGAAGAGATATATTTTACATCCCAGAGGGGCTATAATTGGAGATACCATTGTTTCTGGTACAGAAGTTCCTATAAAAATGGGAAATGCCCTACCTTTGACCGATATG…
Clausena lansium	OL944012	0.6071	0.5	61	rpl23	ATGGATGGAATCAAATATGCAGTATTTACAGACAAAAGTATTCGGTTATTGGGGAAAAATCAATATACTTCTAATGTCGAATCAGGATCAACTAGGACAGAAATAAAGCATTGGGTCGAACTCTTCTTTGGTGTCAAGGTAATAGCTATGAATAGTCATCAACTCCCCCGAAAGGGTAGAAGAATGGGACCTATTATGGCACATACAATGCATTACAGACGTATGATCATTACGCTTCAACCGGGTTATTCTATTCCACCTCTTAGAAAGAAAAGAACTTAA
Clausena lansium	OL944012	0.5425	0.4385	53.7362	ycf2	ATGAAAGGACATCAATTCAAATCCTGGATTTTCGAATTGAGAGAGATATTGAGAGAGATCAAGAATTCTCACTATTTCTTAGATTCATGGACCCAATTCAATTCAGTGGGATCTTTCATTCACATTTTTTTCCACCAAGAACGTTTTATAAAACTCTTGGACCCACGAATTTGGAGTATCCTACTTTCACGCAATTCACAGGGTTCAACAAGCAATCGATATTTCACGATCAAGTGTGTAGTACTGTTTGTAGTAGCGATCCTTATATATCGTATTAACAATCGAAATATGGTCGAAAGAAAAAATCTCTATTTGACAGGGCTTCTTCCTATACCTATGAATTCCATTGGACCCAGAACTGATACATTGGAAGAATCTTTTGGGTCTTCCAATATCAAT…
Clausena lansium	OL944012	0.5714	0.6875	46.5263	ycf15	ATGCTACTGCTGAAACATAGAAGAATTGAAATCTTAGATCAAAACACTATGTATGGATGGTATGAACTGCTTAAACAAGAATTCTTGAACAGCGAACCACCAGAGCTATTACTAACTACATCAAAAAATTTCCATTAA
Clausena lansium	OL944012	0.4277	0.4538	50.4105	ndhB	ATGATCTGGCATGTACAGAATGAAAACTTCATTCTCGATTCTACGAGAATTTTTATGAAAGCCTTTCATTTGCTTCTCTTCGATGGAAGTTTTATTTTCCCAGAATGTATCCTAATTTTTGGCCTAATTCTTCTTCTGATGATCGATTCAACCTCTGATCAAAAAGATATACCTTGGTTATATTTCATCTCTTCAACAAGTTTAGTAATGAGCATAACGGCCCTATTGTTCCGCTGGAGAGAAGAACCTATGATTAGCTTTTCGGGAAATTTCCAAACGAACAATTTCAACGAAATCTTTCAATTTCTTATTTTACTATGTTCAACTCTATGTATTCCTCTATCCGTGGAGTACATTGAATGTACAGAAATGGCTATAACAGAGTTTCTGTTATTCGTA…
Clausena lansium	OL944012	0.5135	0.5798	43.6563	rps7	ATGTCACGTCGAGGTACTACAGAAGAAAAAACTGCAAAATCCGATCCAATTTATCGTAATCGATTAGTTAACATGTTGGTTAACCGTATTCTGAAACACGGAAAAAAATCATTGGCTTATCAAATTATCTATCGAGCCTTGAAAAAGATTCAACAAAAGACAGAAAAAAATCCACTATCTGTTTTACGTCAAGCAATACGTGGAGTAACTCCCGATATAGCAGTAAAAGCAAGACGTGTAGGCGGATCGACTCATCAAGTTCCCATTGAAATAGGATCCGCACAAGGAAAAGCACTTGCCGTTCGTTGGTTATTAGGGGCATCCCGAAAACGTCCGGGTCGAAATATGGCTTTCAAATTAAGTTCCGAATTAGTGGATGCTGCCAAAGGGAGTGGCGAT…
Clausena lansium	OL944012	0.5385	0.5128	58.4913	ycf1	ATGATTTTTCAATCTTTTATACTAGGTAATCTAGTATCCTTATGCATGAAGATAATCAATTCGGTCGTTGTGGTCGGACTCTATTATGGATTTATGACCACATTCTCCATAGGGCCCTCTTATCTCTTCCTTCTCCGAGCTCGGGTTATGGAAGAAGGAGAAGAAGGAACCGAGAAGAAGGTATCAGCAACAACTGGTTTTATTGCGGGACAGCTCATGATGTTCATATCGATCTATTATGCGCCTCTGCATCTAGCATTGGGTAGACCGCATACAATAACTGTCCTAGCTCTACCGTATCTTTTGTTTCATTTCTTCTGGAACAATCCCAAACACTTTTTTGATTATGGATCTACTACCAGAAATTCAATGCGTAATCTTAGCATTCAATGTGTATTC…
Clausena lansium	OL944012	0.5685	0.4061	46.4709	ndhF	ATGGAACATACATATCAATATTCCTGGCTCATACCTTTAGTTCCACTTCCAGTCCCTATGTTAATAGGGGTGGGACTTCTATTTTTTCCGACCGCAACAAAACATCTTCGCCGTATGTGGGCTTTTATTAGTATTTTATTGTTAAGTATAGTTATGATTTTTTCGATCGATCTATCTATTCAGCAAATAGATAGAACTTCGATCTATCAATCCCTAAGGTCTTGGACCATCACTAGTGATTTTTGTTTCGAGTTCGGATACTTTATTGATCCACTTACTTCTATTATGTCAATATTAATCACTACAGTTGGAATTCAGGTTCTTATCTATAGTGACAATTATATGTCTCATGATCAAGGATATTTGAGATTTTTTGCTTATATGAGTTTTTTCAATGCT…
Clausena lansium	OL944012	0.5638	0.4732	50.4997	ccsA	ATGATCTTTTCAACTTTGGAGCGTATATTAACGCATATATCCTTTTCGGTCGTTTCAATTGGAATTACAATTTATTTAATAACCTTCTTAGTCGATGAAATCAGAGGGCTATATGCTTCATCAGAAAGGGGGATGACAGCTACCGCTTTCTGTCTAACAGGATTATTAATCACCCGTTGGGTTTACTCGAAACATTTCCCATTAAGTGATTTATATGAATCATTAATCTTTCTTTCATGGAGTTTATCTATTATTCATAGGATTTTTGATTTTAAAAATAATAAAAATCATTTAAGCGCTATAACGGCACCAAGTGCTTTTTTTACCCAAGGCTTTGCGACTTCGGGTTTTTTAACCAAAATGCATCAATCCGGAATATTAGTACCCGCTCTCCAAGTC…
Clausena lansium	OL944012	0.497	0.4718	52.1493	ndhD	ATGTATCTTGTCTTTACCACGAATTATTTTCCTTGGTTAACACTAATTGTAGTTTTTCCGATAGCCGCGGGTTCTTTAATTTTTTTTCTCCCTCATAGAGGAAATAAGGTGACTAGAGAATATACAATATATATATGTGTCTTAGAACTCCTTCTAACGACCTATGGAATTCTGTATAATTTCCAATTGGACGATCCATTAATCCAGCTGGCAGAGGATTATAAATGGATCACTTTTTTTGAGTTTGACTGGCGATTGGGAATAGATGGACTTTCCATAGGACCCATTTTACTGACGGGATTTATCACCACTTTAGCTACTTTAGCGGCTCGGCCAGTTACTCGGAATTCCCGACTATTCCACTTCCTGATGTTAGCGATGTACAGCGGTCAAATAGGA…
Clausena lansium	OL944012	0.5652	0.4915	54.5317	psaC	ATGTCACATTCAGTAAAGATTTATGATACATGTATAGGGTGTACTCAATGTGTACGAGCTTGCCCCACGGATGTATTAGAAATGATACCTTGGGACGGATGTAAAGCAAAGCAAATTGCTTCTGCTCCAAGAACAGAGGACTGTGTTGGTTGTAAGCGATGCGAATCCGCCTGTCCAACGGATTTCTTGAGTGTTCGAGTTTATTTATGGCATGAAACAACCCGAAGCATGGGTCTAGCTTATTGA
Clausena lansium	OL944012	0.5938	0.3571	61	ndhE	ATGATGCTCGAGCATGTACTTGTTTTGAGTGCCTATTTATTTTCGATTGGTATCTATGGCTTGATTACGAGCCGAAATATGGTTCGGGCCCTGATGTGTCTTGAACTTATACTAAATGCAGTTAATATCAATTTCGTAACATTCTCTGATTTTTTTGATAGTCGACAATTAAAAGGAGATATTTTTGCAATTTTTGTTATAGCTATTGCAGCCGCTGAAGCAGCTATCGGATCAGCTATTGTTTCGTCAATTTATCGTAACAGAAAATCGACGCGTATCAATCAATCGACTTTGTTGAATAAGTAG
Clausena lansium	OL944012	0.5294	0.3906	61	ndhG	ATGGATTTGCCTGGACCAATACACGATTTTCTTTTAGTTTTTCTGGGATCGGGTCTTATATTAGGAGGTCTGGGAGTGGTATTATTTACCAACCCAATTTATTCTGCCTTTTCCTTGGGATTGGTTCTTGTTTGTATATCATTATTCTATATTCTATCAAATTCCCATTTTGTAGCTGCCGCGCAACTCCTTATTTACGTGGGAGCTGTAAATGTTTTAATCATATTTGCTGTAATGTTCATGAGCGGCTCAGACTATTCTAAAGATTTTCAGTTGAATCTTTGGACTATTGGCGATGGTCTTACTTCCCTGGTTTGTACAAGTATTTTTTTTTCGCTAATCACTACTATTCTAGATACGTCGTGGTACGGGATTATTTGGACTACACGAGCCAACCAG…
Clausena lansium	OL944012	0.4872	0.4031	44.9402	ndhI	ATGTTCCCTATGGTAACCGGTTTCATGAATTATGGTCAACAAACAATACGAGCTGCAAGGTACATTGGTCAAAGTTTCATGATTACTTTATCCCAAGCAAATCGTTTACCTGTAACTATTCAATATCCTTATGAAAAATTAATCACATCGGAGCGTTTTCGCGGTCGAATCCATTTTGAATTTGATAAATGTATTGCTTGTGAAGTATGCGTTCGGGTATGTCCTATAGATCTGCCTGTTGTTGATTGGAAATTTGAAACGGATATTCGAAAGAAACGATTGCTTAATTACAGTATTGATTTTGGAATTTGTATTTTTTGTGGTAACTGCGTTGAGTATTGTCCAACAAATTGTTTATCAATGACTGAAGAATATGAACTTGCTACTTACGACCGTCAC…
Clausena lansium	OL944012	0.4479	0.4833	50.6626	ndhA	ATGATAATTGCTACACCCGAAGTACAAGATATCAATTCTTTTTCCAGATTGGAATCCCTACAAGAGGTCTATGGGATCATATGGGTGCTTGCCCCTATTTCGATTTATGTATTGGCAATCACAATAGGTGTCCTCGTAATTGTGTGGTTAGAAAGAGAAATATCCGCAGGAATACAACAGCGTATTGGGCCTGAATACGCCAGCCCTTTGGGAATTCTTCAAGCTTTAGCCGATGGGACAAAACTCCTTTTCAAAGAAAACCTTCTTCCATCTAGAGGAAATAGTAGTTTATTCAGTATTGGTCCATCTATAGCAGTCATAGCAATTCTACTAAGTTATTCAGTAATTCCTTTTAGTTATAACCTTGTTTTAGCTGACCTCAATATCGGTATTTTTTTA…
Clausena lansium	OL944012	0.5702	0.4893	51.3127	ndhH	ATGAGTATACTAGCTACAGAAAAAGAATTTATGATAGTCAATATGGGACCTCACCACCCGTCAATGCATGGTGTTCTTCGTCTCATCGTTACTCTAGACGGTGAAGATGTTATTGACTGTGAACCAATATTGGGTTATTTACACAGAGGGATGGAAAAAATTGCGGAAAACCGAACAATTATACAATATCTGCCTTATGTAACCCGTTGGGATTATTTAGCTACTATGTTCACAGAAGCAATAACTGTAAATGGACCAGAACAGTTGGGAAATATTCGCGTACCTAAAAGGGCCAGCTATATCAGAGTAATTATGTTGGAGTTGAGTCGTATAGCTTCCCATCTGTTATGGCTTGGCCCTTTTATGGCGGATATTGGTGCACAGACTCCCTTCTTCTAT…
Clausena lansium	OL944012	0.5385	0.6	59.2331	rps15	ATGGTAAAAAATGAATTCATCTCAGTTAGGGTTCAAGAAAAAAAAGAAGAAAACAGCGGATCGGTTGAATTTCAAGTATTTCGTTTCACCAACAAGATCCGGAGACTTACTTCACATTTAGAATTGCACAGAAAAGACTATTTATCTCAAAGGGGTCTACGTAAAATTTTGGAAAAACGCCAACGTCTACTAGCTTATTTGTCAAAGAAAAATAGAGTACGTTATAAAGAATTAATTAGTAAGTTGAATATCCGGGAGGCAAAAAATCGTTAA
Clausena lansium	OL944012	0.5271	0.5141	49.9015	ycf1	ATGATTTTTCAATCTTTTATACTAGGTAATCTAGTATCCTTATGCATGAAGATAATCAATTCGGTCGTTGTGGTCGGACTCTATTATGGATTTATGACCACATTCTCCATAGGGCCCTCTTATCTCTTCCTTCTCCGAGCTCGGGTTATGGAAGAAGGAGAAGAAGGAACCGAGAAGAAGGTATCAGCAACAACTGGTTTTATTGCGGGACAGCTCATGATGTTCATATCGATCTATTATGCGCCTCTGCATCTAGCATTGGGTAGACCGCATACAATAACTGTCCTAGCTCTACCGTATCTTTTGTTTCATTTCTTCTGGAACAATCCCAAACACTTTTTTGATTATGGATCTACTACCAGAAATTCAATGCGTAATCTTAGCATTCAATGTGTATTC…
Clausena lansium	OL944012	0.5135	0.5798	43.6563	rps7	ATGTCACGTCGAGGTACTACAGAAGAAAAAACTGCAAAATCCGATCCAATTTATCGTAATCGATTAGTTAACATGTTGGTTAACCGTATTCTGAAACACGGAAAAAAATCATTGGCTTATCAAATTATCTATCGAGCCTTGAAAAAGATTCAACAAAAGACAGAAAAAAATCCACTATCTGTTTTACGTCAAGCAATACGTGGAGTAACTCCCGATATAGCAGTAAAAGCAAGACGTGTAGGCGGATCGACTCATCAAGTTCCCATTGAAATAGGATCCGCACAAGGAAAAGCACTTGCCGTTCGTTGGTTATTAGGGGCATCCCGAAAACGTCCGGGTCGAAATATGGCTTTCAAATTAAGTTCCGAATTAGTGGATGCTGCCAAAGGGAGTGGCGAT…
Clausena lansium	OL944012	0.4277	0.4538	50.4105	ndhB	ATGATCTGGCATGTACAGAATGAAAACTTCATTCTCGATTCTACGAGAATTTTTATGAAAGCCTTTCATTTGCTTCTCTTCGATGGAAGTTTTATTTTCCCAGAATGTATCCTAATTTTTGGCCTAATTCTTCTTCTGATGATCGATTCAACCTCTGATCAAAAAGATATACCTTGGTTATATTTCATCTCTTCAACAAGTTTAGTAATGAGCATAACGGCCCTATTGTTCCGCTGGAGAGAAGAACCTATGATTAGCTTTTCGGGAAATTTCCAAACGAACAATTTCAACGAAATCTTTCAATTTCTTATTTTACTATGTTCAACTCTATGTATTCCTCTATCCGTGGAGTACATTGAATGTACAGAAATGGCTATAACAGAGTTTCTGTTATTCGTA…
Clausena lansium	OL944012	0.5714	0.6875	46.5263	ycf15	ATGCTACTGCTGAAACATAGAAGAATTGAAATCTTAGATCAAAACACTATGTATGGATGGTATGAACTGCTTAAACAAGAATTCTTGAACAGCGAACCACCAGAGCTATTACTAACTACATCAAAAAATTTCCATTAA
Clausena lansium	OL944012	0.5425	0.4385	53.7362	ycf2	ATGAAAGGACATCAATTCAAATCCTGGATTTTCGAATTGAGAGAGATATTGAGAGAGATCAAGAATTCTCACTATTTCTTAGATTCATGGACCCAATTCAATTCAGTGGGATCTTTCATTCACATTTTTTTCCACCAAGAACGTTTTATAAAACTCTTGGACCCACGAATTTGGAGTATCCTACTTTCACGCAATTCACAGGGTTCAACAAGCAATCGATATTTCACGATCAAGTGTGTAGTACTGTTTGTAGTAGCGATCCTTATATATCGTATTAACAATCGAAATATGGTCGAAAGAAAAAATCTCTATTTGACAGGGCTTCTTCCTATACCTATGAATTCCATTGGACCCAGAACTGATACATTGGAAGAATCTTTTGGGTCTTCCAATATCAAT…
Clausena lansium	OL944012	0.6071	0.5	61	rpl23	ATGGATGGAATCAAATATGCAGTATTTACAGACAAAAGTATTCGGTTATTGGGGAAAAATCAATATACTTCTAATGTCGAATCAGGATCAACTAGGACAGAAATAAAGCATTGGGTCGAACTCTTCTTTGGTGTCAAGGTAATAGCTATGAATAGTCATCAACTCCCCCGAAAGGGTAGAAGAATGGGACCTATTATGGCACATACAATGCATTACAGACGTATGATCATTACGCTTCAACCGGGTTATTCTATTCCACCTCTTAGAAAGAAAAGAACTTAA
Clausena lansium	OL944012	0.4945	0.5054	55.29	rpl2	ATGGCGATACATTTATACAAAACTTCTACCCCGAGCACACGCAATGGAGCCGTAGACAGTCAAGTGAAATCCAATCCACGAAATAATTTGATCTATGGACAGCATCGTTGTGGTAAAGGTCGTAATGCCAGAGGAATCATTACCGCAGGGCATAGAGGGGGAGGTCATAAGCGTCTATACCGTAAAATCGATTTTCGACGGAATGAAAAAGACATATATGGTAGAATCGTAACCATAGAATACGACCCTAATCGAAATGCATACATTTGTCTCATACACTATGGGGATGGTGAGAAGAGATATATTTTACATCCCAGAGGGGCTATAATTGGAGATACCATTGTTTCTGGTACAGAAGTTCCTATAAAAATGGGAAATGCCCTACCTTTGACCGATATG…
Clausena lansium	OL944012	0.5417	0.4928	49.7899	rps19	GTGACACGTTCACTAAAAAAAAATCCTTTTGTAGCGAATCATTTATTAAGAAAAATCGATAAGCTTAATACAAAAGCGGAAAAAGAAATAATAATAACTTGGTCCCGGGCATCTACCATTATACCCACAATGGTCGGCCATACTATTGCTATCCATAATGGAAGGGAGCATTTGCCTATTTATATAACAGATCGTATGGTAGGACATAAATTGGGAGAATTTGCGCCCACTATCAATTTCCGTGGACATGCAAAAAATGATAATAGATCCCGTCGTTAA
Corynonema pinoides	OL591215	0.4474	0.5185	53.7248	rps12	ATGCCAACTATTAAACAACTTATTAGAAACCCAAGACAGCCAATCAGAAACGTTACAAAATCCCCCGCTCTTGTGGGATGCCCTCAGCGCCGAGGAACATGTACAAGGGTGTATACTATCACCCCCAAAAAACCAAACTCTGCCTTACGTAAAGTTGCCAGAGTACGATTAACCTCTGGGTTTGAAATCACTGCTTATATACCTGGTATTGGCCATAATTCACAAGAACATTCTGTAGTCTTAGTAAGAGGGGGGAGGGTTAAGGATTTACCCGGTGTGAGATATCACATTGTTCGAGGAACCCTAGATGCTGTCGGAGTAAAGGATCGTCAACAAGGGCGTTCTAGTGCGTTGTAG
Corynonema pinoides	OL591215	0.3675	0.3249	45.9245	psbA	ATGACTGCTATTTTAGAGAGACGCGAAAGCGAACGCCTATGGGGTCGCTTCTGTAACTGGATAACCAGCACCGAAAACCGACTTTACATTGGATGGTTTGGTGTTTTGATGATCCCTACTTTATTGACCGCAACTTCTGTATTTATTATCGCCTTCATTGCTGCCCCTCCAGTCGATATTGATGGTATTCGTGAACCAGTTTCTGGATCTCTCCTTTATGGAAACAATATTATTTCTGGTGCGATTATTCCTACTTCTGCAGCTATAGGTTTGCACTTTTACCCGATATGGGAAGCGGCGTCTGTTGATGAATGGTTATACAATGGTGGTCCTTATGAGCTAATTGTTCTACACTTCTTACTTGGTGTAGCTTGTTACATGGGTCGTGAGTGGGAACTT…
Corynonema pinoides	OL591215	0.5802	0.3966	51.821	matK	ATGAAGGAATTTCAAGTCTATTTAGAACTAGATAGATCTCAACAACACGACTTGCTATATCCGCTTCTTTTTCGGGAGTATATTTATGCACTTGCTCATGATCATGGTTTAAATAGCTCGACGATTTCATTGGAAAGTGGGGGTTATGACAATAAATCTAGTTCACTGAGTGTGAAACGGTTAATTACGCGAATGTATCAACCGATTAATTTGAGTATTGGTACTAATGAGTCTAACCAAAATCCAACTTTTTGTCACAACAAAAAATTGGATTCTCAAATTATATCAGAGGGATTTGCTGTTGTGGTGGAAATTCCATTTTCACTACAGTTGGTAGCTTTTTTCGAAGGGAAAGAAATTCAAAACTCTCATAATTTTCAATCAATTCATTCAACATTT…
Corynonema pinoides	OL591215	0.5556	0.4262	61	rps16	ATGGTAAAACTTCGTTTGAAACGATGTGGTAGAAAGCAACGTGCCGTTTATCGAATCGTTGCAATTGATGGTCGATCCCGAAGAGAAGGAAGAGATCTTCGGAAAGTGGGTTTTTATGATCCGATAAATAATCAAACTCATTTAAATGTTCCTGCTATTCTATATCTCCTTGACAAGGGCGCCCAACCTACAGGAACCGTTCATGATATTTCAAAGAAAGCGGGGGTTTTTACATAA
Corynonema pinoides	OL591215	0.4211	0.3256	33.0864	psbK	ATGTTTAATATCTTTTGTTTAATGTACATCTGTTTTAATTCTGCCCTTTATTCGAGTAGTTTTTTATTCGCCAAATTGCCCGAGGCCTACGCTTTTTTGAATCCAATTGTAGATGTTATGCCAGTAATACCTGTTCTATTTTTTCTCTTAGCCTTTGTTTGGCAAGCTGCTGTAAGTTTTCGATGA
Corynonema pinoides	OL591215	0.2667	0.4091	61	psbI	ATGCTTACTCTCAAACTCTTTGTTTACACCGTAGTGATATTCTTTGTTTCTCTCTTCATTTTCGGATTCCTGTCTAATGATCCAGGGCGTAATCCCGGACGCGAAGAATAA
Corynonema pinoides	OL591215	0.4932	0.5	50.8926	atpA	ATGGCAACAATTAAAGCCGACGAAATTAGTAATATTATCCGTGAACGTATCGAGCAATATAATAGAGAAGTAAAGATTGTAAATATTGGTACCGTACTTCAAGTAGGCGACGGCATCGCCCGTATTTATGGTCTTGATGAAGTAATGGCAGGTGAATTAGTAGAATTTGAAGAGGGTACAATAGGCATTGCTCTTAATTTAGAATCAAATAATGTTGGTGTTGTTTTAATGGGTGACGGTTTAATGATACAAGAGGGAAGTTCTGTAAAAGCAACCGGAAAAATTGCTCAGATACCAGTAAGCGAGGCTTATTTAGGTCGTGTTATAAATGCCCTGGCTAAACCTATTGATGGTCGGGGCGAAATTTCAGCTTCTGAATCTCGATTAATTGAATCTCCC…
Corynonema pinoides	OL591215	0.5397	0.5164	54.6751	atpF	ATGAAAAATGTAACCGATTCTTTCCTTTCTTGGGTTCACTGGCCATTCGCCGGGAGTTTCGGGTTTAATACCGATATTTTAGCAACAAATCCAATAAATCTAAGCGTAGTGATTGGTGTATTGATCTTTTTTGGAAAGGGAGTGTTAAGTGATTTATTAGATAATCGCAAACTGAGGATCTTGAATAGTATTCGAAATTCAGAAGAACTGCAGGACGGGGCCGTCGAACGGCTGGAAAAAGCCCGGGCCCGGTTACGTAAAGTCGAAATAGAAGTAGATCAGTTTCGAGTGAACGGATATTCTGAGATAGAACGAGAAAAATTCAATTTGATTAATTCAACTTCTAAGACTTTGGGCCAATTAGAAAATTTCAAAAATGAAACCATTCATTTTGAACAA…
Corynonema pinoides	OL591215	0.7917	0.3793	55.5236	atpH	ATGAATCCACTGATTTCTGCCGCTTCCGTTATTGCCGCTGGGTTGGCTGTTGGGCTTGCTTCTATTGGACCTGGAGTTGGTCAAGGTACTGCTGCGGGCCAAGCAGTAGAGGGGATTGCGAGACAGCCCGAGGCAGAGGGAAAAATACGAGGTACTTTATTGCTTAGTCTGGCTTTTATGGAAGCTTTAACAATTTATGGACTGGTTGTGGCATTAGCGCTTTTATTTGCGAATCCTTTTGTTTAA
Corynonema pinoides	OL591215	0.4247	0.4286	60.3369	atpI	ATGAATGTTTTATCATGTTCCATCAACACACTAAAGGTGTTATACGATATATCTGGTGTGGAAGTAGGCCAACATTTTTATTGGCAAATAGGTGGGTTCCAGGTCCATGCCCAAGTACTTATTACTTCTTGGGTTGTAATTGCTATCTTATTAGGTTCAGCTTTTATAGCCGTTCGGAATCCACAAACCGTTCCGACTGCCAGTCAAAATTTCTTCGAATATGTCCTTGAATTCATTCGAGACGTGAGCAAAACTCAGATTGGAGAAGAATATGGCCCATGGGTTCCCTTTATTGGAACTATGTTTCTTTTTATTTTTGTTTCGAATTGGTCAGGTGCTCTTTTACCTTGGAAAATCATAGAGTTACCTCATGGGGAGTTAGCCGCACCCACGAATGAT…
Corynonema pinoides	OL591215	0.5429	0.4431	54.1317	rps2	ATGGCAAGAAGATATTGGAACATCCATTTGGAAGAGATGATGGAAGCAGGAATTCATTTTGGTCATGGTACTCGGAAATGGAATCCTAGAATGGCACCTTATATATCTGCAAAACACAAAGGTATTCATATTACAAATCTTACTCGAACTGCTCGTTTTTTATCAGAAGCTTGTGATTTAGTTTTTGATGCAGCAAGTAGGGGAAAACTATTCTTAATTGTTGGTACTAAAAATAAAGCTGCTGATTCAGTCACCCGAGCTGCACTAAAGGCTCGGTGTCATTATGTTAATAAAAAATGGCTCGGCGGTATGTTAACGAATTGGTCCACTACAGAAACGAGACTTCACAAGTTCAGGGATTTGAGAACGGAACAAAAAAGGGGGGGACTTGACAGTCTT…
Corynonema pinoides	OL591215	0.5717	0.4679	52.4483	rpoC2	ATGGCAGAACGGGCGAGTTTGGTCTTTCACAATAAAATGATAGATGGAACTGCCATTAAACGACTTATTAGCAGGTTAATAGATCACTTCGGAATGGCATATACATCACACATCCTGGATCAAGTAAAGACCCTGGGTTTCCAGCAAGCCACTGCTACATCTATTTCATTAGGCATTGATGATCTTTTAACTATACCTTCGAAGCGATGGCTAGTCCAAGATGCTGAACAACAAAGTATTATTTTGGAAAAACAACATCATTATGCGAATGTCCACGCGATAGAAAAACTACGTCAATCCATTGAGATATGGTATGCTACAAGTGAATATTTGCGACAAGAAATGAATCCTAATTTTAGGATGACTGATCCCTTTAATCCAGTCCATATAATGTCTTTT…
Corynonema pinoides	OL591215	0.599	0.465	50.0331	rpoC1	ATGATTGATCGATATAAACATCAACAACTCCGAATTGGATCAGTTTCTCCTCAAAAAATAAGCGCTTGGGCCAAAAAAATCCTACCTAATGGAGAGATAGTTGGAGAAGTGACAAAACCCTATACTTTTCATTACAAAACCAATAAACCGGAAAAAGATGGATTATTTTGTGAAAGAATTTTTGGGCCTATTAAAAGTGGAATTTGCGCTTGTGGAAATTATCGAATAATCGGAGATGAAAAAGAAGACCCGCAATTTTGTGAACAATGTGGAGTTGAATTTGTTGATTCTCGGATACGAAGATATCAAATGGGATACATAAAACTTGGATGCCCAGTAACCCACGTGTGGTATTTGAAACGTCTTCCTAGTTATATCGCGAATCTTTTAGATAAACCT…
Corynonema pinoides	OL591215	0.6012	0.4884	51.3813	rpoB	ATGCTCGGAGATGGAAATGCGGGAATGTCTACAATACCTGGGTTGAATCAGATACAATTTGAAGGCTTTTGTAGGTTCATTGATCAGGGCTTAACAGAAGAACTTTATAAGTTTCCAAAAATTGCAGATACAGATCAAGAAATAGAATTTCAATTATTTGTGGAAACATATCAATTGGTAGAACCCTTGCTAAAAGAAAGAGATGCTGTATATGAATCATTCACGTATTCTTCTGAATTATATGTCTCTGCAGGATTAATTTTGAAAAGCCGAGGGGATATGCAGGAACAAACAATTTTTATTGGAAACCTTCCCCTAATGAATTCTTTAGGAACTTCTATAGTAAATGGAATATACAGAATTGTCATCAATCAAATATTGCAAAGTCCCGGTATCTAT…
Corynonema pinoides	OL591215	0.5455	0.5263	29.2857	petN	ATGGATATAGTAAGTCTCGCTTGGGCTGCTTTAATGGTAGTCTTTACATTTTCCCTTTCGCTCGTAGTATGGGGAAGAAGTGGACTCTAG
Corynonema pinoides	OL591215	0.5	0.4074	45.1818	psbM	ATGGAAGTAAATATTCTCGCATTTATTGCTACTACACTGTTCGTTCTAGTTCCTACTGCCTTTTTGCTTATAATATATGTAAAAACGGTCAGTCAAAGTGATTAA
Corynonema pinoides	OL591215	0.4462	0.3705	54.0105	psbD	ATGACTATAGCCCTTGGTAAATTTACCAAAGATGAAAAAGATTTATTTGATATTATGGATGACTGGTTACGGAGGGACCGATTCGTTTTTGTAGGTTGGTCCGGCCTATTGCTCTTTCCTTGTGCCTATTTCGCTTTAGGGGGTTGGTTCACAGGCACAACCTTTGTAACTTCATGGTATACCCACGGCTTGGCCAGTTCCTATTTGGAAGGCTGCAACTTCTTAACCGCCGCAGTTTCGACTCCTGCTAATAGTTTAGCACATTCTTTGTTGTTACTATGGGGCCCTGAAGCACAAGGGGATTTTACTCGTTGGTGTCAATTAGGCGGTCTTTGGACTTTTGTTGCTCTCCACGGTGCTTTCGGACTAATAGGGTTCATGTTACGTCAATTTGAACTT…
Corynonema pinoides	OL591215	0.507	0.3938	49.61	psbC	GTGGAAACGCTCTTTAATGGAACTTTATCTGTAGTAGGTCGTGACCAAGAAACCACCGGTTTTGCTTGGTGGGCCGGGAATGCCCGACTTATCAATTTATCCGGTAAACTGCTAGGCGCTCATGTAGCCCATGCTGGATTAATTGTATTCTGGGCCGGAGCAATGAACCTATTTGAAGTGGCTCATTTCGTACCAGAAAAGCCCATGTATGAACAAGGATTAATTTTACTTCCCCACCTAGCTACTCTAGGCTGGGGGGTAGGTCCTGGTGGGGAAGTTATAGATACCTTTCCATACTTTGTATCTGGAGTACTTCACTTAATTTCCTCTGCCGTATTGGGGTTTGGCGGTATTTATCATGCCCTTCTGGGACCTGAGACTCTTGAAGAATCCTTTCCA…
Corynonema pinoides	OL591215	0.5	0.3488	58.6463	psbZ	ATGACTATTGCTTTCCAATTGGCTGTTTTTGCATTAATTGCCACTTCATCAATCTTACTGATTAGTGTACCCGTTGTATTTGCTTCTCCGGATGGTTGGTCGAGTAACAAAAATGTCGTATTTTCTGGTACATCAGTGTGGATTGGATTAGTCTTTCTGGTGGGTATCCTTAATTCTCTCATCTCTTAA
Corynonema pinoides	OL591215	0.7576	0.5441	49.4535	rps14	ATGGCCAGGAAAGGTTTGATTCATAGGGAGAAGAAAAGGCAAAAATTGGAACAAAAATATCATTTGATTCGTCGATCCTCAAAAATAGAAATAAAAAAAGTTCCGTCGTTGAGCGATAAATGGAAAATTCATGGAAAGCTACAATCCTCACCGCGTAATAGTGCACCTACACGTTTTCATCGACGTTGTTTTTCGACCGGAAGGCCGAGAGCTAACTATCGAGATTTTGGACTATCCAGGCACAAACTTCGTGAAATGGTTCATGCATGTTTGTTGCCGGGGGCAACAAGATCAAGTTGGTAA
Corynonema pinoides	OL591215	0.5363	0.3799	51.1949	psaB	ATGGCATTAAGATTTCCAAGGTTTAGCCAAGGCTTAGCGCAGGACCCCACTACTCGTCGTATTTGGTTTGGTATTGCTACCGCACATGACTTCGAGAGTCATGATGATATTACTGAGGAACGTCTTTATCAGAATATTTTTGCTTCTCACTTCGGGCAATTAGCAATAATTTTTCTGTGGACTTCCGGAAATCTCTTTCATGTAGCTTGGCAAGGAAATTTTGAAGCATGGGTACAGGACCCTTTACACGTAAGACCTATTGCTCATGCTATTTGGGATCCTCATTTTGGTCAACCAGCCGTGGAAGCTTTTTCTAGGGGAGGTGCTCTTGGTCCGGTGAATATCGCTTATTCTGGTGTTTATCAGTGGTGGTATACAATCGGTTTACGCACTAATGAG…
Corynonema pinoides	OL591215	0.5192	0.4175	52.156	psaA	ATGATTATTCGTTCGCCGGAACCAGAAGTAAAAATTTTGGTAGATAGGGATCCCATAAAAACTTCTTTCGAGGAATGGGCCAGACCGGGTCATTTCTCAAGAACCATAGCTAAGGGACCTGATACTACCACTTGGATCTGGAACCTACATGCTGATGCTCACGACTTCGATAGCCATACCAGTGATTTGGAGGAGATCTCTCGAAAAGTATTTAGTGCCCATTTCGGACAACTCTCCATCATTTTTCTTTGGTTGAGCGGCATGTATTTCCACGGTGCTCGTTTTTCCAATTATGAAGCCTGGCTAAGCGATCCTACTCACATTGGACCCAGTGCACAGGTGGTTTGGCCAATAGTGGGCCAAGAAATATTGAACGGTGATGTGGGCGGGGGTTTCCGA…
Corynonema pinoides	OL591215	0.5614	0.469	46.9906	ycf3	ATGTCTAGATCGCGGATAAATGGAAATTTTATTGATAAGACCTTTTCAATTGTAGCCAATATATTATTACGAATAATTCCGACAACTTTAGGAGAAAAAGAGGCATTTAGCTATTACAGAGATGGTGCGATGTCAGCTCAATCTGAAGGCAATTATGCGGAAGCTTTACAGAATTATTATGAAGCTATGCGACTCGAAATTGATCCGTACGATCGAAGCTATATACTCTATAACATAGGCCTTATCCACACAAGTAACGGAGAACATACAAAAGCTTTAGAATATTATTTTCGGGCACTCGAACGAAATCCATTCTTACCACAAGCTTTTAATAATATGGCTGTGATCTGTCATTACCGGGGAGAGCAGGCCGTTCGGCAGGGAGATTCAGAAATTGCG…
Corynonema pinoides	OL591215	0.5345	0.5	61	rps4	ATGTCACGTTACCGAGGGCCTCGTTTCAAAAAAATACGCCGTCTGGGGGCTTTGCCGGGACTAACGGGTAAAGGGCCTAGGGCCGGAAGCGATTTTAGAAACCAATCGCGCTCCGGAAAAAAATCTCAATATAGAATTCGTTTAGAAGAAAAACAAAAATTGCGTTTTCATTATGGTCTTACAGAACGACAATTACTTAAATATGTTCGTATCGCCGGAAAAACCAAAGGGTCAACGGGTCTGGTTTTACTACAATTACTTGAAATGCGTTTGGATAACATCCTTTTTCGGTTGGGTATGGCTTCAACTATTCCTCAAACCCGCCAACTAATTAACCATCGACATATTTTAGTTAATGGGCGTATAGTCGATATACCAAGTTATCGTTGCAAACCCCGA…
Corynonema pinoides	OL591215	0.6545	0.4038	51.3121	ndhJ	ATGCAGGGTCGTTTGTCTGCTTGGCTAGTTAAGCACGGGATAGTTCATAGATCTTTGGGCTTCGATTACCAAGGAATAGAAACTTTACAAATAAAGCCCGAGGATTGGCATTCCGTTGCTGTCATTTTGTATGTATATGGTTACAATTATCTACGTTCCCAATGTGCCTATGATGTAGCGCCGGGTGGACTGCTGGCCAGTGTGTATCATCTTACGCGAATAAAGTATGGTGTAGAGCAACCCGAAGAGGTGTGCATAAAAGTATTTGCTCCAAGGAGTAATCCTAAAATTCCATCTGTTTTCTGGGTTTGGAAAAGTGCGAATTTTCAAGAACGGGAATCTTATGATATGTTGGGAATCTTTTATGATAATCATCCACGACTGAAACGTATCTTAATG…
Corynonema pinoides	OL591215	0.5079	0.4321	56.9644	ndhK	ATGAATTCCATTGAATTTTCTTTACTTGATCGAACAACCTCAAATTCTTTTATTTCAACTACACCAAATGATCTTTCCAATTGGTCAAGACTCTCCAGTTTATGGCCGCTTCTTTATGGTACCAGTTGTTGTTTCATTGAATTTGCTTCATTAATCGGCTCGCGATTCGATTTTGACCGTTATGGACTGGTACCAAGATCGAGCCCTAGACAGGCGGACCTAGTTTTAACAGCTGGTACCGTAACAATGAAAATGGCTCCTTCTTTAGTGAGATTATATGAACAAATGCCTGAACCAAAATATGTTATTGCTATGGGAGCATGTACAATTACAGGGGGGATGTTCAGTACCGATTCGTATAGTACTGTTCGGGGAGTTGATAAGCTAATTCCTGTGGAT…
Corynonema pinoides	OL591215	0.6571	0.407	44.512	ndhC	ATGTTTCTGCTTTACAAATATGATATTTTCTGGGCATTTCTAATAATATCAAGTGTTATTCCTATTTTGGCATTTCGAATTTCCGCAGTTTTAGCCCCGATTAACAAAGGGCCAGAGAAACTTTCTGGTTATGAGTCGGGTATAGAACCAATGGGCGATGCTTGGTTACAATTTAGAATCCGGTATTATATGTTTGCTCTAGTTTTTGTTGTTTTTGATGTTGAAACCGTTTTTCTTTATCCATGGGCAATGAGTTTTGATATATTGGGGGTATCCGTATTTATAGAAGCTTTCATTTTCATGCTTATCCTAATTGTTGGTTCAGTTTATGCGTGGAGAAAAGGAGCATTAGAGTGGTCTTAG
Corynonema pinoides	OL591215	0.5778	0.5	61	atpE	ATGACCTTAAATCTTTGTGTACTGACCCCGAATCGAATTGTTTGGGATTCAGAAGTGAAAGAAATCATTTTATCGACCAATAGTGGACAAATAGGCGTATTACCAAATCACGCGCCTATTGCCACAGCTGTAGATATAGGTATTTTAAGAATCCGCTTTAACGACCAATGGGTAACGATGGCTCTGATGGGCGGTTTTGCTAGAATAGGGAATAATGAGATCACTATTTTAGTAAATGATGCGGAGAAGAGTAGTGACATTGATCCCCAAGAAGCCCAGCAAACTCTTGAAATAGCGGAAGCTAATTTGAGGAAAGCTGAAAGCAAGAGACAAACAATTGAGGCAAATCTAGCTCTCAGACGAGCTAGGACACGAGTAGAGGTTATCAATGCGATTTGA
Corynonema pinoides	OL591215	0.522	0.4912	50.4287	atpB	ATGAGAATAAATCCTACTACTTCCGGCCCTGGGGTTTCCGCGCTTGCAAAAAAAAAACCGGGACATATCGCTCAAATCATTGGTCCGGTACTGGATGTAGCCTTTCCACCCGGTAAGATGCCTAATATTTACAATGCTCTAGTAGTTAAGAGTCGAGATACTGCCGGTCAACCAATTAATGTGACTTGCGAGGTACAGCAATTATTAGGGAATAATCGGGTTAGAGCGGTAGCCATGAGTGCTACAGATGGTCTAACGAGAGGGATGGAAGTAATTGACACGGGAGCTCCTCTAAGTGTTCCAGTCGGTGGAGCGACTCTAGGACGAATTTTCAACGTGCTTGGAGAGCCTGTTGATAATTTAGGTCCTGTAGATACCCGCACAACATCCCCTATTCAT…
Corynonema pinoides	OL591215	0.4545	0.4286	52.0576	rbcL	ATGTCACCACAAACAGAGACTAAAGCTAGTGTTGGATTCAAAGCCGGTGTTAAAGACTATAAATTGACTTATTATACTCCTGACTATGTAACCAAAGATACTGATATCTTGGCAGCATTCCGAGTAACTCCTCAACCCGGAGTTCCGCCTGAGGAAGCGGGGGCTGCAGTAGCCGCGGAATCTTCTACCGGTACATGGACAACTGTGTGGACCGATGGGCTTACCAGCCTTGATCGTTACAAAGGGCGATGCTACAACATTGAGCCCGTTGCTGGAGAAGAACATCAATATATATGTTATGTAGCTTACCCGTTAGACCTTTTTGAAGAAGGTTCTGTTACTAACATGTTTACTTCCATTGTGGGTAATGTATTTGGTTTCAAAGCCCTGCGCGCTCTA…
Corynonema pinoides	OL591215	0.5479	0.338	47.2485	accD	ATGAAAAAAAGGTGGTTCAATTTGATGTTATCTAAGGGTAAGGGTAAAGGGGAATTAGAATACAGGTGTGGGTTAAGTAAATCTATGGATAGTCTTGGTCCTATTAAAAATACCAGTGTAAGCGAGGATCCGATTCGAAATGATAAGGATAAAAACATTCATAGTTCGAGTGATAGGGACTGTTCGAGTTACAGCAATTTAGCCGGTGTCAGGGACATTCGTAATTTCATTTCGGATGACACCTTTTTTGTTAAGGATAGTAATAGGGACAGCTATTCCATATATTTTGATATTGAAAATCAAATTTTGGAAATAGACAATGATCATTCTTTTCTGAGTGAACTAGAAAGTTCTTTTTATAGCTTTCGTAATTATAGTTCTAGGAATACTGCATCCAAA…
Corynonema pinoides	OL591215	0.5385	0.44	57.8022	psaI	ATGACAATTTTCAACAGCTTTCCCTCCATTTTAGTGCCTTTAGTGGGCCTAGTATTTCCGGCAGCGGCAATGGCTTCTTTATTTCTTTATCTTGAAAAAAATAAGATTTTTTAA
Corynonema pinoides	OL591215	0.5238	0.4344	53.5179	ycf4	ATGAGTTGGCGATCAGAATATGTATGGATAGAATTTATAGCAGGCTCTCGCAAAACAAGCAATTTCTGCTGGGCCCTTATCCTTCTTTTAGGTTCATTAGGATTCTTAGTGGTTGGAATTTCTAGTTATCTTGATAGGAATTTGCTATCTTTATTTCCGTCTCAGCAAATCAAATTTTTTCCACAAGGGATCGTGATGTCTTTCTACGGGATCGCGGGTCTCTTTATTAGTTCCTATTTGTGGTGCACAATTACATGGAATGTAGGTAGCGGCTATGATCGATTTGATACAAAAGAGGGAATAGTGTGTATTTTTCGTTGGGGATTTCCTGGAAAAAATCGCCGCATCTTTCTACGATTCCTTATGAAAGATATTCAATCCATTCGAATAGAAGTTAAA…
Corynonema pinoides	OL591215	0.5067	0.4	57.4491	cemA	ATGACAAAAAAAAAAACGAACGCATCTATTCCCCTTAGATATCTTTCATCTATAGTATTTTTAGTATTTTTGCCCTGGTGTACCCCTCTCTCATTTAATAAAAATCTGGAATCTTGGGTTACTAATTGGTGGAATACTAGTCAACCCGAAACCTTTTTGAATTATATTCAAGAAAAAGTTATCCTAGAAAAATTCATAGAATTAGAGGAATTATTCTTCTTGGACGAAATGATAAAGGAATTTACGGAAAGGCGTCTAGAAAAGCTTCGTATAGGGCTCCCGAAAGAAACAATTCAATTAATCAAGATGCACGATGAGGATCATATCCATACGATTTTTCACTTCTCGACAAATACAATCTGCTTCGTTATTCTAAGTGGTTATTCGATTCTGTGTAAT…
Corynonema pinoides	OL591215	0.5926	0.4366	61	petA	ATGCAAATTCGAAATACCTTTTCTTCGTTAAAGGGAGAGATTACTCGATTCATTTCCGTATCCCTCATGATATATATAATAACTCAGGCATCAATTTCAAATGCATATCCCGTTTTTGCGCAGCAGGGTTTTGAAAATCCACGAGAGGCAACCGGTCGCATTGTATGCGCTAATTGTCATTTAGCTAATAAGCCCGTGGATATTGAGGTTCCACAGGCGATACTCCCTGATACTGTATTTGAAGCAGTTGTTAGAATTCCGTATGATATGCAACTGAAACAAGTTCTTGCTAATGGTAAAAGGGGGTCTTTGAATGTGGGGGCTGTTCTTATTTTACCAGAGGGGTTTGAATTAGCCCCCTCCGACCGTATTTCGCCCGAGATGAAAGAAAAGATAGGC…
Corynonema pinoides	OL591215	0.5	0.3333	22.9529	psbJ	ATGGCCGATACTACTGGAAGGATTCCCCTTTGGATAATAGGTACTGTAACTGGTATTCCTGTGATCGGTTTAATAGGCATTTTCTTTTATGGTTCATATTCCGGATTAGGTTCGTCCTTGTAG
Corynonema pinoides	OL591215	0.3125	0.4783	61	psbL	ATGACACAATCAAACCCGAACGAACAAAATGTTGAATTGAACCGTACCAGTCTCTACTGGGGGTTATTACTCATTTTTGTACTTGCTGTTTTATTTTCCAATTACTTCTTCAATTAA
Corynonema pinoides	OL591215	0.5714	0.6154	55.2727	psbF	ATGACCATAGATCGAACCTATCCAATTTTTACAGTGCGATGGTTGGCTGTACACGGACTAGCTGTACCTACCGTTTCTTTTTTGGGGTCAATATCAGCAATGCAGTTCATCCAACGATAA
Corynonema pinoides	OL591215	0.3793	0.4182	52.6492	psbE	ATGTCTGGAAGCACAGGAGAACGTTCTTTTGCTGATATTATTACCAGTATTCGATACTGGGTCATTCATAGCATTACTATACCTTCCCTATTCATTGCGGGTTGGTTATTCGTCAGCACGGGGTTAGCTTACGATGTGTTTGGAAGCCCTCGCCCAAACGAGTATTTTACAGAGAGACGACAAGGAATTCCATTAATAACCGGCCGTTTTGATTCTTTGGAACAACTCAACGAATTTAGTAGATCTTTTTAG
Corynonema pinoides	OL591215	0.5714	0.36	36.9615	petL	ATGCCTACCATAACTAGTTATTTTGGTTTTCTCCTAGCAGCTTTAACTATAACCTCGGCTCTATTTATTGGTCTGAGTAAGATAGGACTTATTTGA
Corynonema pinoides	OL591215	0.3636	0.4815	61	petG	ATGATTGAAGTCTTTCTATTTGGAATCGTCTTAGGTCTAATTCCTATTACTTTGGCTGGATTATTCGTAACCGCATATTTACAATACAGACGTGGTGATCAGTTGGACCTTTGA
Corynonema pinoides	OL591215	0.6667	0.5333	61	psaJ	ATGCGAGATCTAAAAACATATCTTTCCGTGGCACCGGTACTAAGTACTTTATGGTTCGGGTCTTTAGCAGGGTTATTGATAGAAATTAATCGTTTATTCCCGGACGCATTGACATTTCCTTTTTTTTATTTCTAG
Corynonema pinoides	OL591215	0.6	0.4468	54.736	rpl33	ATGGCCAAAGGGAAAGATGCCCGAGTAAGGGTTATTTTGGAATGTACTAGTTGTGTTCGAAACGGTGTTAATAAGGAATTAAGGGGTATTTCCAGATATATTACTCAAAAGAATCGACACAATACACCTAGTCGATTGGAATTGAGAAAATTCTGTCTCTATTGTTACAAACATACACTTCATGGGGAGATAAAAAAATAG
Corynonema pinoides	OL591215	0.6667	0.4933	52.6775	rps18	ATGGATAAAACCAAGCGACTCTTTCTTAAAAACAAGCGATCTTTTCGTAGGCGTTTGCCCCCGATACAATCGGGGGATCGAATTGATTATAGAAACATGACTTTAATTAATCGATTTCTTAGTGAACAAGGAAAAATATTATCTAGACGGGTGAATAGATTGACCTTAAAAGAACAGCGATTAATTACTATTGCTATAAAACAAGCTCGTATTTTATCTTCGTTACCTTTTCTTAATAATGACAAGCAATTTGAAAGAAGTGGGCCGATCACTAAAACTCCAGGTCTTCGAACCAGAAAAAAATAG
Corynonema pinoides	OL591215	0.6944	0.4821	47.9721	rpl20	ATGACCAGAATTAGACGAGGATATATAGCTCGGAGACGTAGAACAAAAATGCGTTTATTTGCATCAAGCTTTCGCGGGGCTCATTCAAGACTTAGTCGAACAAGTACTCAACAGAAAATAAGAGCTTTGGTTTCGGCTCATCGTGATAGAGATAGACAAAAAAGGGATTTTCGTCGTTTGTGGATCACTCGAATAAATGCAGTAATTCGCGTAAATATGGTATCCTTTATTTATATTTATAGTAGATTAATACACAATCTGTATAAGGCGCAGTCGGTTCTTAATCGTAAGATACTTGCACAAATAGCTATATCAAATAGTAATTGTCTTTATATGATTTCCAATGAGATCCTAAAAAAAGTAAATTGGAAGGGGTCCATTCTAATTTTTAAACGGAGT…
Corynonema pinoides	OL591215	0.3793	0.4754	59.2451	rps12	CTACAACGCACTAGAACGCCCTTGTTGACGATCCTTTACTCCGACAGCATCTAGGGTTCCTCGAACAATGTGATATCTCACACCGGGTAAATCCTTAACCCTCCCCCCTCTTACTAAGACTACAGAATGTTCTTGTGAATTATGGCCAATACCAGGTATATAAGCAGTGATTTCAAACCCAGAGGTTAATCGTACTCTGGCAACTTTACGTAAGGCAGAGTTTGGTTTTTTGGGGGTGATAGTATGCCAACTATTAAACAACTTATTAGAAACCCAAGACAGCCAATCAGAAACGTTACAAAATCCCCCGCTCTTGTGGGATGCCCTCAGCGCCGAGGAACATGTACAAGGGTGTAT
Corynonema pinoides	OL591215	0.5286	0.4921	60.9952	clpP1	ATGCCTATTGGTGTTCCAAAAGTACCCTATCGAAGTCCTGGGGACAAACATCCATCTTGGGTTGACATCAACCGACTTTATCGAGAAAGATTACTTTTTTTAGGTCAAATGGTTGAGAGTGATATCTCGAATCAACTTATTGGTATTATGGTATATCTCAGTATAGAGAACGAGACCAAGGATTTGTATTTATTTATCAACTCTCCTGGCGGATGGGTAATACCCGGAATAGCAATTTATGATACTATGCAATTTGTGCGACCAGATGTACAGACAATATGCATGGGATTGGCCGCCTCCATGGGGTCTTTTCTCCTGGCCGCAGGAGCAAGTACCAAACGTCTAGCATTCCCTCACGCTAGGGTCATGATCCATCAACCTTTTGGCGCTTTTTATGGG…
Corynonema pinoides	OL591215	0.5091	0.4211	50.6501	psbB	ATGGGTTTGCCTTGGTATCGTGTTCATACCGTCGTATTGAATGATCCCGGTCGTTTGATTGCTGTCCATATAATGCATACAGCCCTGGTTGCGGGTTGGGCCGGTTCAATGGCTCTATATGAATTAGCTGTTTTTGACCCCTCCGATCCAGTTCTTGATCCAATGTGGAGRCAAGGCATGTTCGTTATACCCKTCATGACTCGTGTAGGAAKAACCGATTCATGGGGCGGKTGGAGTATTACGGGGGGGACGGTAACGAATCCGGGTATTTGGAGTTACGAAGGTGTAGCCGGGGCACATATTGTGTTTTCGGGCTTGTGCTTCTTGGCAGCTATCTGGCATTGGGTGTATTGGGACCTAGCAATATTTGTTGATGACCGTACGGGAAAACGCTCTTTG…
Corynonema pinoides	OL591215	0.4545	0.5217	43.1429	psbT	ATGGAAGCATTGGTTTATACATTCCTCTTAGTCTCGACTCTAGGGATCATTTTTTTCGCTATCTTTTTTCGAGAACCGCCTAAAGTTCCAACTAAAAAATGA
Corynonema pinoides	OL591215	0.4375	0.5357	54.7273	psbN	ATGGAAATAGCAACCCTAGTCGCCATCTCTATATCTGGGTTACTTGTAAGTTTTACTGGGTATGCCTTATATACTGCTTTTGGGCAACCCTCTCAACAACTAAGAGATCCATTCGAGGAACACGGGGACTAG
Corynonema pinoides	OL591215	0.8333	0.4	61	psbH	ATGGCTGCACAAACAGTTGAGGGTAGTTCTAGAACTCGTCCAAAAATGACTTCTGCAGGGGGGTTATTGAAACCTTTGAATTCGGAATATGGTAAAGTAGCTCCTGGATGGGGAACTACTCCTTTGATGGGTATCGCAATGGCTCTATTTGCGATATTCCTGTGTATTATTTTGGAGATTTATAATTCGTCCGTTTTACTGGACGGAATTTCAATGAATTAG
Corynonema pinoides	OL591215	0.5735	0.4257	54.0139	petB	ATGAGTAAAGTATACGATTGGTTTGAAGAACGGCTCGAGATTCAGGCGATTGCAGATGATATAACTAGTAAATACGTTCCTCCTCATGTCAACATATTTTATTGTCTAGGAGGAATTACGCTTACTTGTTTTTTAGTACAAGTAGCTACAGGGTTTGCTATGACTTTTTACTACCGTCCGACCGTTACTGAAGCTTTTGCTTCTGTTCAATACATAATGACGGAAGTTAACTTTGGTTGGTTAATCCGATCAGTTCATCGATGGTCGGCAAGTATGATGGTCCTAATGACAATCCTGCACATATTTCGTGTGTACCTCACTGGCGGTTTTAAAAAACCTCGCGAATTGACTTGGGTTACAGGCGTGGTTCTGGCTGTATTGACCGCATCTTTTGGTGTA…
Corynonema pinoides	OL591215	0.5814	0.4915	46.4718	petD	ATGGGAGTAACAAAAAAACCTGACTTGAACGATCCTGTATTAAGGGCTAAGTTGGCTAAAGGTATGGGTCATAATTATTATGGAGAACCTGCATGGCCCAATGATCTTTTATATATTTTTCCGGTAGTAATTCTAGGTACTATTGCATGTAGCGTGGGCTTAGCGGTTCTAGAACCATCAATGATTGGTGAACCCGCGGATCCGTTTGCAACTCCTTTGGAAATATTACCCGAATGGTATTTCTTTCCTGTATTTCAAATACTTCGTACAGTACCCAATAAGCTGTTGGGTGTTCTTTTAATGGTTTCAGTACCTGCGGGATTATTAACAATACCCTTTTTGGAAAATGTTAATAAATTCCAAAATCCATTTCGCCGCCCAGTAGCGACAACCATCTTT…
Corynonema pinoides	OL591215	0.51	0.4956	56.7932	rpoA	ATGGTTCGAGAGAAAGTCAAAGTATCTACTGGGACACTACAGTGGAAGTGTGTTGAATTAAGAGCAGACAGTAAACGTCTTTATTATGGACGCTTTATCTTGTCTCCACTTATGAAAGGTCAAGCCGACACAATAGGCATTGCGATGCGAAGAGTTTTGCTTGGGGAAATAGAAGGAACGTGTATTACACGCGCAAAATCTGAGAAAATCACACATGAATATTCTACCGTAGTGGGTATTCAAGAATCGGTACATGAAATTTTAATGAATTTGAAAGAAATTGTATTGAGAAGTAATCTTTATGGAATTTGTGACGCGCTTATTTGTGTCAAAGGTCCGGGATACGTAACCGCTCAAGACATCCTCTTGCCACCTTCTGTAGAAATCGTTGATAAGACG…
Corynonema pinoides	OL591215	0.5682	0.4842	61	rps11	ATGGCAAAATCTACAACAAGAAGCGGTTCACGTAGGACTGGACGGATTGGTTCGCGTAAAAGTGGGCGTCGAATACCAAAGGGCGTGATTCATGTTCAAGCAAGTTTCAACAACACCATTGTGACTGTTACGGATGTACGGGGTCGGGTAATTTCTTGGTCCTCGGCCGGTACTTGTGGATTCAGGGGTACAAGAAGAGGTACGCCCTTTGCTGCTCAAACCGCAGCAGGAAGTGCTATTAGAGCAGTGGGGGATCAAGGTATGCAACGAGCAGAAGTCATGATAAAGGGTCCTGGTCTCGGAAGAGATGCAGCATTACGAACTATTCGTAGAAGCGGTATCCTTTTAAATTTCGTACGGGATGTAACCCCTATGCCACATAATGGTTGCAGACCCCCT…
Corynonema pinoides	OL591215	0.6154	0.64	22.75	rpl36	ATGAAAATAAGGGCTTCCGTTCGGAAAATTTGTGAAAAATGTCGACTGATCCGCAGGCGGGGACGGATTATAGTAATTTGTTCCAACCCGAGACATAAACAAAGACAAGGATAA
Corynonema pinoides	OL591215	0.5	0.5474	41.8235	rps8	ATGGGTAAGGACACTATTGCTGACATAATAACTTGTATACGAAATGCTGACATGAATCGAAAAGGAACGGTTCGAATAGCATCTACTAACATCACCGAAAACTTTGTTAAAATACTTTTGCGAGAGGGTTTTATAGAAAACGTAAGGAAACTCGTGGAAAACAAAAAAGAGTTTTTAGGTTTAACCCTACGACATAGAAGGAATAGGAAAGGACCATATAGGCCCTTTTTAAATTTAAAACGAATCAGTCGACCCGGTCTACGAATCTATTTTAACTATGAACGAATTCCTAGAATTTTAGATGGGATGGGGATTGTAATTCTCTCTACTTCTCGGGGTATAATGACAGACCGAGCGGCTCGACTAGAAAGAATCGGCGGAGAAATTTTGTGTTATATA…
Corynonema pinoides	OL591215	0.5294	0.4719	53.0434	rpl14	ATGATTCAACCTCAAACCCATTTGAATGTAGCGGACAATAGCGGTGCCCGAGAATTGATGTGTATTCGAATCATAGGAGCCAGTAATCGTAGATATGCTCATATTGGTGACGTTATTGTTGCTGTGATCAAGGAAGCAGTACCAAATACGCCTCTAGAAAGATCCGAGGTGATCAGGGCTGTAATTGTACGTACTTGTAAAGAACTCAGGCGAGATAACGGTATGATAATACGTTATGATGACAATGCTGCAGTTGTCATTGATCAAGAAGGAAATCCAAAGGGAACTCGAATTTTTGGTGCGATCGCCCGAGAATTGAGACAGTTGAATTTTACTAAAATAGTTTCATTAGCACCTGAAGTATTATAA
Corynonema pinoides	OL591215	0.4773	0.5914	47.5518	rpl16	ATGCTTAGTAACCCCAAAAGAACAAGATTCCGTAAACAACATAGAGGAAGAATGAAAGGAATATCTTATCGAGGTAATCATATTAGTTTCGGCAGATATGCTCTTCAAGCACTTGAACCCGCTTGGATCACATCTAGACAAATCGAAGCAGGGCGCCGAGCAATGACACGAAATGTAAGGCGTGGTGGAAAAATATGGGTACGTATATTTCCAGACAAACCGGTTACAGTAAGACCCACGGAAACCCGTATGGGGTCCGGGAAAGGATCCCCCGAATATTGGGTAGCCGTCGTGAAACCGGGTAGAATCCTTTATGAAATGAGTGAAGTCGCCGAAAATATCGCTCGAAGGGCTATTTCAATAGCGGCGTCCAAAATGCCTATAAGAACTCAATTCATT…
Corynonema pinoides	OL591215	0.425	0.6	51.0719	rps3	ATGGGACAAAAAATAAATCCACTTGGATTCCGACTTGGTACAACACAAAGCCATTATTCGCTTTGGTTTGAAAAACAAAAAAATTATAGCGAAGGTCTACAAGAAGATCAAAAAATACGAAACATTCTTAAGAATTATGTACAAAAAAATATGATAATATCCTCTGATCTTGAGGGAATTGACCGGATAGAAATTAAAAAAAGAATTGATCTAATTCAAGTCATAATATATATAGGATTTCCAAAAATTTTACTAGAAAATAGACCGCGAAGAGTTGAAGAATTACAGATGAACGTACAAAAAGAACTTAATTGTGTGAACCGAAAAATAAACATTGCTATTACAAGAATTGCAAATCCTTATGGACACCCCAATATTCTTGCCGAATTTTTAGCCGGA…
Corynonema pinoides	OL591215	0.5581	0.4706	61	rpl22	ATGATAAGGATAATAAAGAAGAAGGTCGAAGTATCTGCTTTAGGTAAACATATATGTATGTCTGCTCACAAAGCCCGAAGGGTAATTGATCAGATTCGTGGACGTTCTTACGAGGAAGCCCTTATGATACTCGAACTCATGCCTTATAGAGCATGTTATCCCATTAAGAAATTGGTTTATTCTGCAGCAGCAAATGGCATGATGTTCTTTTTTAGTCATACTAGTTATCCTATGGGCGAACGACGGGAATTGAACCCGCGCATGGTGGATTCACAATCCACTGCCTTGATCCACTTGGCTACATCCGCCCCTCGGTTATTTACAAAATTATGA
Corynonema pinoides	OL591215	0.5833	0.4783	49.7899	rps19	GTGACACGTTCACTAAAAAAAAATCCTTTTGTGGCGAATCATTTATTAAGAAAAATCGATAAGCTTAATACAAAAGCGGAAAAAGAAATAATAATAACTTGGTCCCGGGCATCTACCATTATACCCACAATGGTTGGCCATACTATTGCTATCCATAATGGAAGGGAGCATTTGCCTATTTATATAACAGATCGTATGGTAGGACATAAATTGGGAGAATTTGCGCCCACTATCAATTTCCGTGGACATGCAAAAAATGATAATAGATCCCGTCGTTAA
Corynonema pinoides	OL591215	0.4891	0.5081	58.5302	rpl2	ATGGCGGTACATTTATACAAAACTTCTACCCCGAGCACACGCAATGGAGCCGTAGACAGTCAAGTGAAATCCAATCCACGAAATAATTTGATCTATGGACAGCATCGTTGTGGTAAAGGTCGTAATGCCAGAGGAATCATTACCGCAGGGCATAGAGGGGGAGGTCATAAGCGTCTATACCGTAAAATCGATTTTCGACGGAAGGAAAAAGAAAAAGACATATATGGTAGAATCGTAACCATAGAATACGACCCTAATCGAAATGCATACATTTGTCTCATACACTATGGGGATGGTGAGAAGAGATATATTTTACATCCCAGAGGGGCTATAATTGGAGATACCATTGTTTCTGGTACAGAAGTTCCTATAAAAATGGGAAATGCCCTACCTTTGACC…
Corynonema pinoides	OL591215	0.5926	0.5075	61	rpl23	ATGGATGGAATCAAATATGCAGTATTTACAGACAAAAGTATTCGGTTATTGGGGAAAAATCAATATACTTCTAATGTCGAATCAGGATCAACTAGGACAGAAATAAAGCATTGGGCCGAACTCTTCTTTGGTGTCAAGGTAATAGCTATGAATAGTCATCAACTCCCCCGAAAGGGTAGAAGAATGGGACCTATTATGGCACATACAATGCATTACAGACGTATGATCATTACACTTCAACCGGGTTATTCTATTCCACCTCTTAGAAAGAAAAGAACTTAA
Corynonema pinoides	OL591215	0.5322	0.4375	53.5989	ycf2	ATGAAAGGACATCAATTCAAATCCTGGATTTTCGAATTGAGAGAGGTATTGAGAGAGATCAAGAATTCTCACTATTTCTTAGATTCATGGACCCAATTCAATTCAGTGGGATCTTTCATTCACATTTTTTTGCACCAAGAACGTTTTATAAAACTCTTGGACCCACGAATTTTGAGTATCCTACTTTCACGCAATTCACAGGGTTCAACAAGCAATCGATATTTCACGATCAAGGGTGTAGTACTTTTTGTAGTAGCGATCCTTATATATCGTATTAACAATCGAAATATGGTCGAAAGAAAAAATCTCTATTTGACAGGGCTTCTTCCTATACCTATGAATTCCATTGGACCCAGAACTGATACATTGGAAGAATCTTTTGGGTCTTCCAATATCAAT…
Corynonema pinoides	OL591215	0.5714	0.6875	46.5263	ycf15	ATGCTACTGCTGAAACATAGAAGAATTGAAATCTTAGATCAAAACACTATGTATGGATGGTATGAACTGCTTAAACAAGAATTCTTGAACAGCGAACCACCAGAGCTATTACTAACTACATCAAAAAATTTCCATTAA
Corynonema pinoides	OL591215	0.4277	0.458	51.5127	ndhB	ATGATCTGGCATGTACAGAATGAAAACTTCATTCTCGATTCTACGAGAATTTTTATGAAAGCCTTTCATTTGCTTCTCTTCGATGGAAGTTTGATTTTCCCAGAATGTATCCTAATTTTTGGCCTAATTCTTCTTCTGATGATCGATTCAACCTCTGATCAAAAAGATATACCTTGGTTATATTTCATCTCTTCAACAAGTTTAGTAATGAGCATCGCGGCCCTATTGTTCCGATGGAGAGAAGAACCTATGATTAGCTTTTCGGGAAATTTCCAAACGAACAATTTCAACGAAATCTTTCAATTTCTTATTTTACTATGTTCAACTCTATGTATTCCTCTATCCGTGGAATACATTGAATGTACAGAAATGGCTATAACGGAGTTTCTGTTATTCGTA…
Corynonema pinoides	OL591215	0.5	0.5763	44.6844	rps7	ATGTCACGTCGAGGTACTACAGAAGAAAAAGCTGCAAAATCCGATCCAATTTATCGTAATCGCTTAGTTAACATGTTGGTTAACCGTATTCTGAAACACGGAAAAAAATCATTGGCTTATCAAATTATCTATCGAGCCTTGAAAAAGATTCAACAAAAGACAGAAAAAAATCCACTATCTGTTTTACGTCAAGCAATACGTGGAGTAACTCCCGATATAGCAGTAAAAGCAAGACGTGTAGGCGGATCGACTCATCAAGTTCCCATTGAAATAGGATCCGCACAAGGAAAAGCACTTGCCGTTCGTTGGTTATTAGGGGCATCCCGAAAACGTCCGGGTCGAAATATGGCTTTCAAATTAAGTTCCGAATTAGTGGATGCTGCCAAAGGGAGTGGCGAT…
Corynonema pinoides	OL591215	0.9412	0.475	43.3065	rpl32	ATGGCAGTTCCAAAAAAACGTATTTCTATATTAAAAAAACGTATTCGTAAGAATATTTGGAAAAAGGGGGGGAATTGGGCAGCGTTGAAGTCTTTTTCGTTAGCGAAATCCCTTTCTACTGGGAATTCAAAAAGTTTTTTTTGTAAAATAAATAAGAAAACGTTGGAATAA
Corynonema pinoides	OL591215	0.5169	0.476	52.1907	ccsA	ATGATCTTTTCAACTTTAGAGCATATATTAACGCATATATCCTTTTCGGTCGTTTCAATTGGAATTCCAATATATTTACTAACCTTATTAGTCGATGAAATAAGAGGACTATATGATTCATCAGAAAAGGGGATGATAGCTACCGCTCTCTGTCTAACAGGATTATTAATCGCCCGTTGGATTTACTCGAGGCATTTTCCGTTAAGTGATTTATATGAATCGTTAATCTTTCTTTCATGGAGTTTCTCCATTATTCATAGAATTTTCGATATTAAAAATAATAAAAATCGTTTAAGCGCTATAACGGCACCAAGTGGTATTTTTACCCAAGGCTTTGCTACTTCAGGTTTTTTAACCAAAATGCATCAATCCGGAATATTAGTACCCGCTCTCCAAGTC…
Corynonema pinoides	OL591215	0.4753	0.4776	51.8681	ndhD	ATTGTAGTTTTTCCGATAGCCGCGGGTTCTTTAATTTTCTTTCTACCTCATAGAAGCAATAAGGTGACTAGAGGATATACAATATATATATGTGTTTTAGAACTCCTTCTAATGACCTATGCGTTTTGTTATAATTTCCAATTGGACGATCCATTAATCCAGCTGAAAGAGGATTCTAAATGGATCACCCTTTTAAATTTTGACTGGCGGTTGGGAATAGACGGACTTTCCATAGGACCCGTTTTACTGGCGGGATTTATCACTACTTTAGCTACTTTAGCGGCTCGGCCAGTTACTCGGAATTCACGACTATTCCATTTCCTAATGTTAGCGATGTACAGCGGTCAAATAGGACCATTTTCTTCTCGAGACCTTTTACTTTTTTTCATCATGTGGGAA…
Corynonema pinoides	OL591215	0.5909	0.4833	30.716	psaC	ATGTCACATTCAGTAAAGATTTATGATACATGTATAGGGTGTACTCAATGTGTCCGAGCTTGCCCCACAGATGTATTAGAAATGATACCTTGGGACGGATGTAAAGCAAAGCAAATAGCTTCTGCTCCAAGAACAGAGGATTGTGTTGGTTGTAAGCGATGCGAATCCGCCTGTCCAACGGATTTCTTGAGTGTTCGGGTTTATTTATGGCATGAAACAACTAGAAGCATGGGTCTAGCTTATTGA
Corynonema pinoides	OL591215	0.5556	0.3733	54.7137	ndhE	ATGATGCTTGAGCATGTACTTGTTTTGAGTGCCTATTTATTTTCTATTGGTATCTATGGATTGATTACAAGCCGAAATATGGTTCGGGCCCTGATGTGTCTTGAACTTATAGTAAATGCAGTTAATATCAATTTCGTAACATTCTCTGATTTTTTTGATAGTCGACAATTAAAAGGAGATATTTTCTCAATTTTTGTTATAGCTATTGCAGCCGCTGAAGCAGCTATCGGATCAGCTATTGTTTCGTCAATTTATCGTAACAGAAAATCGACTCGTATCAATCAATCGACTTTGTTGAATAAATAG
Corynonema pinoides	OL591215	0.5	0.376	61	ndhG	ATGGATTTGCCTGGACCAATACATGATTTTCTTTTAGTTTTTCTGGGCTCAGGTATTATATTAGGAGGTCTGGGAGTGGTATTATTTACCAACTCGATTTATTCTGCCTTTTGCTTGGGGTTGGTTCTTGTTTGTATATCCTTATTCTATATTCTATCAAATTCCCATTTCGTAGCTGCCGCGCAACTCCTTATTTACGTCGGAGCTGTAAATGTTTTAATCATATTTGCTGTAATGTTCATGAATGGTTCAGACTATTCCAAAGATTTTCATTTGAATTTTTGGACTGTTGGTGACAGACTTACTTCCCTGGTTTGTACAAGTATTTTTTTTTCGCTAATCGCTACTATTCTAGATACGTCGTGGTACGGGATTATTTGGACTACACGACCCAACCAG…
Corynonema pinoides	OL591215	0.5789	0.4	60.3297	ndhI	ATGTTCCCTATGGTAATTGGTTTCATGAATTATGGTCAACAAACAATACGAGCTGCAAGGTACATTGGTCAAAGTTTCATGATTACTTTATCCCAAGCAAATCGTTTACCTGTAAGTATTCAATATCCTTATGAAAAATTAATCACATTGGAGCGTTTTCGCGGTCGAATCCATTTTGAATTTGATAAATGTATTGCTTGTGAAGTATGTGTTCGCGTATGCCCTATAGATCTGCCTGTTGTTGATTGGAAATTTGAAACAAATATTCGAAAGAAACATTTGCTTAATTACAGTATTGATTTTGGAATTTGTATTTTTTGTGGTAACTGTGTTGAGTATTGTCCAACAAATTGTTTATCAATGACTGAAGAATATGAACTGGCTACTTATGACCGTCAC…
Corynonema pinoides	OL591215	0.5476	0.4929	46.6752	ndhA	ATGATAATTGATACAACAGAAGTACAAGATATCAATTCTTTTTCCAGATTAGAATCCCTGCAAGAGGTCTATGGGATCATGTGGGTGCTTGCCCTTATTTCAATTCCGGTAGTGGCAATCACAATAGGTGTCCTAGTGATTGTGTGGTTAGAAAGAGAAATATCTGCAGGAATACAACAACGTATTGGGCCTGAATACGCCAGTCCCTTGGGAATTCTTCAAGCTTTAGCAGATGGGACAAAACTACTTTTCAAAGAAAATCTTCTTCCATCTAGAGGAAATAGTAGTTTATTCAGTATTGGACCATCTATAGCAGTCATAGCAATTCTACTAAGTTCTTCAGTAATTCCTTTTAGTTATAACCTTGTTTTAGCTGACCTCAATATCGGTATTTTTTTA…
Corynonema pinoides	OL591215	0.5833	0.4895	49.7164	ndhH	ATGAGTATACTAGCTACAGAAAAAGAATTTATGATAGTCAATATGGGACCTCACCACCCATCAATGCACGGCGTTCTTCGTCTTATAGTTACTCTAGATGGTGAAGATGTTATTGACTGTGAACCAATATTGGGTTATTTACACCGAGGGATGGAAAAAATTGCGGAAAACCGAACAATTATACAATATCTGCCTTATGTAACCCGTTGGGATTATTTAGCTACTATGTTCACCGAAGCAATAACTGTAAATGGACCCGAACTCTTGGGAAATATTCAAGTACCCAAAAGAGCCAGCTATATCCGAGTAATTATGTTGGAGTTGAGTCGTATAGCTTCCCATTTGTTATGGCTTGGCCCTTTTATGGCCGATATTGGTGCACAGACTCCTTTCTTCTAT…
Corynonema pinoides	OL591215	0.7083	0.6143	49.9042	rps15	ATGGTAAAAAATTCATTCGTCTCGGTTATGTTTCAAGAAAAAAAAGAAGAAAAAGAAGAAAACTGTGGATCGGTTGAATTTCAAGTATTACGTTTCACTAATAAGATAAGGAGACTTACTTCACATTTAGAATCACACAGAAAAGACTATTTATCTCAAAGGGGTCTACGGAAAGTTTTGGAAAAACGCCAACGTCTACTAGTGTATTTGTCAAAGAAAAATAGAGTACGTTATAAGGAATTAATTAGTAAGTTGAATATTCGGGAGTCAAAAAATCGTTAA
Corynonema pinoides	OL591215	0.5217	0.5182	49.1272	ycf1	ATGATTGTTCAATCTTTTATACTAGGGAATCGAGTATCCTTATGCATGAAGATAATCAATTCGGTCGTTGTGATCGGACTCTATTATGGATTTATGACCACATTCTCCATAGGGCCCTCTTATCTCTTCCTTCTCCGAGCTCGGGTTATGGAAGAAGGAGAAGAAGGAACCGAGAAGAAGGTATCAGCAACAACTGGTTTTATTGCGGGACAGCTCATGATGTTCATATCGATCTATTATGCGCCTCTGCATCTAGCATTGGGTAGACCTCATACAATAACTGTCCTAGCTCTACCGTATCTTTTGTTTCATTTCTTCTGGAACAATCCCAAACACTTTTTTGATTATAGATCTACTACCAGACGTAATCTTAGCATTCAATGTGTATTCCTGAATAAT…
Corynonema pinoides	OL591215	0.5	0.5763	44.6844	rps7	ATGTCACGTCGAGGTACTACAGAAGAAAAAGCTGCAAAATCCGATCCAATTTATCGTAATCGCTTAGTTAACATGTTGGTTAACCGTATTCTGAAACACGGAAAAAAATCATTGGCTTATCAAATTATCTATCGAGCCTTGAAAAAGATTCAACAAAAGACAGAAAAAAATCCACTATCTGTTTTACGTCAAGCAATACGTGGAGTAACTCCCGATATAGCAGTAAAAGCAAGACGTGTAGGCGGATCGACTCATCAAGTTCCCATTGAAATAGGATCCGCACAAGGAAAAGCACTTGCCGTTCGTTGGTTATTAGGGGCATCCCGAAAACGTCCGGGTCGAAATATGGCTTTCAAATTAAGTTCCGAATTAGTGGATGCTGCCAAAGGGAGTGGCGAT…
Corynonema pinoides	OL591215	0.4277	0.458	51.5127	ndhB	ATGATCTGGCATGTACAGAATGAAAACTTCATTCTCGATTCTACGAGAATTTTTATGAAAGCCTTTCATTTGCTTCTCTTCGATGGAAGTTTGATTTTCCCAGAATGTATCCTAATTTTTGGCCTAATTCTTCTTCTGATGATCGATTCAACCTCTGATCAAAAAGATATACCTTGGTTATATTTCATCTCTTCAACAAGTTTAGTAATGAGCATCGCGGCCCTATTGTTCCGATGGAGAGAAGAACCTATGATTAGCTTTTCGGGAAATTTCCAAACGAACAATTTCAACGAAATCTTTCAATTTCTTATTTTACTATGTTCAACTCTATGTATTCCTCTATCCGTGGAATACATTGAATGTACAGAAATGGCTATAACGGAGTTTCTGTTATTCGTA…
Corynonema pinoides	OL591215	0.5714	0.6875	46.5263	ycf15	ATGCTACTGCTGAAACATAGAAGAATTGAAATCTTAGATCAAAACACTATGTATGGATGGTATGAACTGCTTAAACAAGAATTCTTGAACAGCGAACCACCAGAGCTATTACTAACTACATCAAAAAATTTCCATTAA
Corynonema pinoides	OL591215	0.5322	0.4375	53.5989	ycf2	ATGAAAGGACATCAATTCAAATCCTGGATTTTCGAATTGAGAGAGGTATTGAGAGAGATCAAGAATTCTCACTATTTCTTAGATTCATGGACCCAATTCAATTCAGTGGGATCTTTCATTCACATTTTTTTGCACCAAGAACGTTTTATAAAACTCTTGGACCCACGAATTTTGAGTATCCTACTTTCACGCAATTCACAGGGTTCAACAAGCAATCGATATTTCACGATCAAGGGTGTAGTACTTTTTGTAGTAGCGATCCTTATATATCGTATTAACAATCGAAATATGGTCGAAAGAAAAAATCTCTATTTGACAGGGCTTCTTCCTATACCTATGAATTCCATTGGACCCAGAACTGATACATTGGAAGAATCTTTTGGGTCTTCCAATATCAAT…
Corynonema pinoides	OL591215	0.5926	0.5075	61	rpl23	ATGGATGGAATCAAATATGCAGTATTTACAGACAAAAGTATTCGGTTATTGGGGAAAAATCAATATACTTCTAATGTCGAATCAGGATCAACTAGGACAGAAATAAAGCATTGGGCCGAACTCTTCTTTGGTGTCAAGGTAATAGCTATGAATAGTCATCAACTCCCCCGAAAGGGTAGAAGAATGGGACCTATTATGGCACATACAATGCATTACAGACGTATGATCATTACACTTCAACCGGGTTATTCTATTCCACCTCTTAGAAAGAAAAGAACTTAA
Corynonema pinoides	OL591215	0.4891	0.5081	58.5302	rpl2	ATGGCGGTACATTTATACAAAACTTCTACCCCGAGCACACGCAATGGAGCCGTAGACAGTCAAGTGAAATCCAATCCACGAAATAATTTGATCTATGGACAGCATCGTTGTGGTAAAGGTCGTAATGCCAGAGGAATCATTACCGCAGGGCATAGAGGGGGAGGTCATAAGCGTCTATACCGTAAAATCGATTTTCGACGGAAGGAAAAAGAAAAAGACATATATGGTAGAATCGTAACCATAGAATACGACCCTAATCGAAATGCATACATTTGTCTCATACACTATGGGGATGGTGAGAAGAGATATATTTTACATCCCAGAGGGGCTATAATTGGAGATACCATTGTTTCTGGTACAGAAGTTCCTATAAAAATGGGAAATGCCCTACCTTTGACC…
Corynonema pinoides	OL591215	0.5833	0.4783	49.7899	rps19	GTGACACGTTCACTAAAAAAAAATCCTTTTGTGGCGAATCATTTATTAAGAAAAATCGATAAGCTTAATACAAAAGCGGAAAAAGAAATAATAATAACTTGGTCCCGGGCATCTACCATTATACCCACAATGGTTGGCCATACTATTGCTATCCATAATGGAAGGGAGCATTTGCCTATTTATATAACAGATCGTATGGTAGGACATAAATTGGGAGAATTTGCGCCCACTATCAATTTCCGTGGACATGCAAAAAATGATAATAGATCCCGTCGTTAA
Corynonema pinoides	OL591215	0.5581	0.4706	61	rpl22	ATGATAAGGATAATAAAGAAGAAGGTCGAAGTATCTGCTTTAGGTAAACATATATGTATGTCTGCTCACAAAGCCCGAAGGGTAATTGATCAGATTCGTGGACGTTCTTACGAGGAAGCCCTTATGATACTCGAACTCATGCCTTATAGAGCATGTTATCCCATTAAGAAATTGGTTTATTCTGCAGCAGCAAATGGCATGATGTTCTTTTTTAGTCATACTAGTTATCCTATGGGCGAACGACGGGAATTGAACCCGCGCATGGTGGATTCACAATCCACTGCCTTGATCCACTTGGCTACATCCGCCCCTCGGTTATTTACAAAATTATGA
Corynonema pungens	OL591216	0.4474	0.5185	53.7248	rps12	ATGCCAACTATTAAACAACTTATTAGAAACCCAAGACAGCCAATCAGAAACGTTACAAAATCCCCCGCTCTTGTGGGATGCCCTCAGCGCCGAGGAACATGTACAAGGGTGTATACTATCACCCCCAAAAAACCAAACTCTGCCTTACGTAAAGTTGCCAGAGTACGATTAACCTCTGGGTTTGAAATCACTGCTTATATACCTGGTATTGGCCATAATTCACAAGAACATTCTGTAGTCTTAGTAAGAGGGGGGAGGGTTAAGGATTTACCCGGTGTGAGATATCACATTGTTCGAGGAACCCTAGATGCTGTCGGAGTAAAGGATCGTCAACAAGGGCGTTCTAGTGCGTTGTAG
Corynonema pungens	OL591216	0.384	0.31	33.84	psbA	ATGACTGCTATTTTAGAGAGACGCGAAAGCGAACGCCTGTGGGGTCGCTTCTGTAACTGGATAACCAGCACCGAAAACCGCCTTTACATTGGATGGTTTGGTGTTTTGATGATCCCTACTTTATTGACCGCAACTTCTGTATTTATTATCGCCTTCATTGCTGCCCCTCCGGTCGATATTGATGGTATTCGTGAACCTGTTTCTGGATCTCTACTTTACGGAAACAATATTATTTCTGGTGCGATTATTCCTACTTCTGCAGCTATAGGTTTGCACTTTTACCCGATATGGGAAGCGGCATCTGTTGATGAATGGTTATACAATGGTGGTCCTTATGAGCTAATTGTTCTGCACTTCTTGCTTGGTGTAGCTTGTTACATGGGTCGTGAGTGGGAACTT…
Corynonema pungens	OL591216	0.5765	0.3824	53.501	matK	ATGAAGGAATTTAAAGTCTATTTAGAACTAGATAGATCTCAACAACACGACTTGTTATACCCGCTTCTTTTTCGGGAGTATATTTATGCACTTGCTCATGATCATGGTTTAAATAGTTCGACGATTTCGTTGGAAAGTGTGGGTTATGACAATAAATCTAGTTCGCTGAGTGTGAAACGGTTAATTACGCGAATGGATCAACCGATTAATTTGAGTATTGCTACTAATGAGTCTAACCAAAATCCAATTTTTTGTCATAACCAAAAATTGGATTCTCAAATTATATCAGAGGGATTTGCTATTGTGGTGGAAATTCCATTTTCCCTACGGTTGGTAGCTTTTTTCGAAGGGAACAAAATTGAAAACTCTCATAATTTTCAATCAATTCATTCAATATTT…
Corynonema pungens	OL591216	0.5263	0.403	52.6718	rps16	ATGGTAAAACTTCGTTTGAAACGCTGTGGTAGAAAGCAACGTGCCATTTATCGAATCGTTGCAATTGATGGTCGATCCCGAAGAGAAGGAAAAGATCTTCAGAAAGTGGGTTTTTATGATCCGATAAATAATCAAACCCATTTAAATGTTCCTGCTATTCTATATTTCCTTGACAAGGGTGCCCAACCTACAGGAACCGTTCATGATATTTCAAAGAAAGCGGGGGTTTTTACAGAACTTAGTCTTAATAAAATTTAA
Corynonema pungens	OL591216	0.4444	0.2955	58.6508	psbK	ATGTTTAATATCTTTCGTTTAATGTACATCTGTCTTAATTCTGCTCTTTATTCGAGTAGTTTTTTATTCGCCAAATTGCCCGAGGCCTACGCTTTTTTGAATCCAATTGTAGATGTTATGCCAGTAATACCTGTTCTTTTTTTTCTCTTAGCCTTTGTTTGGCAAGCTGCTGTAAGTTTTCGATGA
Corynonema pungens	OL591216	0.25	0.4286	61	psbI	ATGCTTACTCTCAAACTCTTTGTTTACACCGTAGTGATATTCTTTGTTTCTCTCTTCATCTTCGGATTCCTGTCTAATGATCCAGGGCGTAATCCCGGACGCGAAGAATAA
Corynonema pungens	OL591216	0.4771	0.5042	51.259	atpA	ATGGCAACAATTAAAGCCGACGAAATTAGTAATATTATCCGTGAACGTATCGAGCAATATAATAGAGAAGTAAAGGTTGTAAATATTGGTACCGTACTTCAAGTAGGCGACGGCATCGCCCGTATTTATGGTCTTGATGAAGTAATGGCGGGTGAATTAGTAGAATTTGAAGAGGGTACAATAGGCATTGCTCTTAATTTAGAATCAAATAATGTTGGTGTTGTTTTAATGGGTGACGGTTTAATGATACAAGAGGGAAGTTCTGTAAAAGCAACCGGAAAAATTGCTCAGATACCAGTAAGCGAGGCTTATTTAGGTCGTGTTATAAATGCCCTAGCTAAACCTATTGATGGTCGAGGCGAAATTTCAGCTTTTGAATCTCGATTAATTGAATCTCCC…
Corynonema pungens	OL591216	0.5484	0.5285	55.5596	atpF	ATGAAAAATGTAACCGATTATTTCCTTTCTTTGGTTCACTGGCCATTCGCCGGGAGTTTCGGGTTTAATACCGATATTTTAGCAACAAATCCAATAAATCTAAGTGTAGTGATTGGTGTATTGATCTTTTTTGGAAAGGGAGTGTTAAGTGATTTATTAGATAATCGCAAACTGAGGATCTTGAATAGTATTCGAAATTCAGAAGAACTGCAGGACGGGGCCGTCGAACGGCTGGAAAAAGCCCGGGCCCGCTTACGGAAAGTTGAAATAGAAGTAGATAAGTTTCGAGTGAACGGATATTCTGAGATAGAACGAGAAAAACTCAATTTGATTAATTCAACTTCTAAGACTTTGGGCCAATTAGAAAATTTCAAAAATGAAACCATTCTTTTTGAACAA…
Corynonema pungens	OL591216	0.7917	0.3793	54.9697	atpH	ATGAATCCACTGATTTCTGCCGCTTCCGTTATTGCCGCTGGGTTGGCTGTTGGGCTTGCTTCTATTGGACCTGGGGTTGGTCAAGGTACTGCTGCGGGCCAAGCAGTAGAGGGGATTGCGAGACAACCCGAGGCGGAGGGAAAAATACGAGGTACTTTATTGCTTAGTCTGGCTTTTATGGAAGCTTTAACAATTTATGGACTGGTTGTAGCATTAGCGCTTTTATTTGCGAATCCTTTTGTTTAA
Corynonema pungens	OL591216	0.4079	0.4419	58.0404	atpI	ATGAATGTTTTATCATGTTCCACCAACATACTAAAGGGGTTATACGATATATCCGGTGTGGAAGTAGGCCAACATTTCTATTGGCAAATAGGCGGGTTCCAAGTCCATGCCCAAGTACTTATTACTTCTTGGGTTGTAATTGCTATCTTATTAGGTTCAGCCTTTATAGCCGTTCGGAATCCACAAACCGTTCCGACTTCCAGTCAAAATTTCTTCGAATATGTCCTTGAATTCATTCGAGACGTGAGCAAAACTCAGATTGGAGAAGAATATGGCCCATGGGTTCCCTTTATTGGAACTATGTTTCTTTTTATTTTTGTTTCGAATTGGTCAGGGGCTCTTTTACCTTGGAAAATCATAGAGTTACCTCATGGGGAGTTAGCCGCACCCACGAATGAT…
Corynonema pungens	OL591216	0.5571	0.4371	53.5526	rps2	ATGGCAAGAAGATATTGGAACATCCATTTGGAAGAGATGATGGAAGCAGGAATTCATTTTGGTCATGGTACTCGGAAATGGAATCCTAGAATGGCACCTTATATATCTGCAAAACACAAAGGTATTCATATTACAAATCTTACTCGAACTGCTCGTTTTTTATCAGAAGCTTGTGATTTAGTTTTTGATGCAGCAAGTAGGGGAAAACTATTTTTAATTGTTGGTACTAAAAATAAAGCTGCTGATTCAGTCACCCGAGCTGCACTAAAGGCTCGGTGCCATTATGTTAATAAAAAATGGCTCGGCGGTATGTTAACGAATTGGTCCACTACAGAAACGAGACTTCACAAGTTCAGGGATTTGAGAACGGAACAGAAAAGGGGGAGACTTGACAGTCTT…
Corynonema pungens	OL591216	0.5742	0.4725	52.7515	rpoC2	ATGGCAGAACGGGCGAGTCTGGTCTTTCACAATAAAATGATAGACGGAACTGCTATTAAACGACTTATTAGCAGGTTAATAGATTACTTCGGGATGGCATATACATCACACATCCTGGATCAAGTAAAGACCCTGGGTTTCCAGCAAGCCACTGCTACATCTATTTCATTAGGCATTGATGATCTTTTAACGATACCTTCGAAGCGATGGCTAGTCCAAGATGCTGAACAACAAAGTCTTATTTTGGAAAAACACCATCAGTATGCGAATGTCCACGCGATAGAAAAACTACGTCAATCCATTGAGATATGGTATGCTACAAGTGAATATTTGCGACAAGAAATGAATCCTAATTTTAGGATGACGGATCCCTTTAATCCAGTCCATATAATGTCTTTT…
Corynonema pungens	OL591216	0.6	0.4686	50.1738	rpoC1	ATGATTGATCGATATAAACATCAACAACTCCGAATTGGATCAGTTTCTCCTCAAAAAATAAACGCTTGGGCCAAAAAAATCCTACCTAATGGAGAGATAGTTGGAGAAGTGACAAAACCCTATACTTTTCATTACAAAACCAATAAACCGGAAAAAGATGGATTATTTTGTGAAAGAATTTTTGGGCCTATTAAAAGTGGAATTTGCGCTTGTGGAAATTATCGAATAATCGGAGATGAAAAAGAAGACCCGCAATTTTGTGAACAATGTGGAGTTGAATTTGTTGATTCTCGGATACGAAGATATCAAATGGGATACATAAAACTTGGATGCCCAGTAACCCACGTGTGGTATTTGAAACGTCTTCCTAGTTATATCGCGAATCTTTTAGATAAACCT…
Corynonema pungens	OL591216	0.614	0.4825	50.8409	rpoB	ATGCTCGGAGATGGAAATGCGGGAATGTCTACAATACCTGGGTTGAATCAGATACAATTTGAAGGCTTTTGTAGGTTCATTGATCAGGGCTTAACAGAAGAACTTTATAAGTTTCCAAAAATTGCAGATACAGATCAAGAAATTGAATTTCAATTATTTGTGGAAACATATCAATTGGTAGAACCCTTGCTAAAAGAAAGAGATGCTGTATATGAATCATTCACCTATTCTTCTGAATTATATGTCTCTGCAGGATTAATTTTGAAAAGCCGAGGGGATATGCAGGAACAAACGATTTTTATTGGAAACATTCCTCTAATGAATTCTTTGGGAACTTCTATAGTAAATGGAATATACAGAATTGTCATCAATCAAATATTGCAAAGTCCCGGTATCTAT…
Corynonema pungens	OL591216	0.5455	0.5263	29.2857	petN	ATGGATATAGTAAGTCTCGCTTGGGCTGCTTTAATGGTAGTCTTTACATTTTCCCTTTCGCTCGTAGTATGGGGAAGAAGTGGACTCTAG
Corynonema pungens	OL591216	0.5	0.4074	45.1818	psbM	ATGGAAGTAAATATTCTCGCATTTATTGCTACTACACTGTTCGTTCTAGTTCCTACTGCCTTTTTGCTTATAATATATGTAAAAACGGTCAGTCAAAGTGATTAA
Corynonema pungens	OL591216	0.4758	0.3565	52.104	psbD	ATGACTATAGCCCTTGGTAAATTTACCAAAGATGAAAAAGATTTATTTGATATTATGGATGACTGGTTACGGAGGGACCGATTCATTTTTGTAGGTTGGTCCGGCCTATTGCTCTTTCCTTGTGCTTATTTCGCTTTAGGGGGTTGGTTCACAGGCACAACCTTTGTAACTTCATGGTATACCCATGGCTTGGCCAGTTCCTATTTGGAAGGCTGCAACTTCTTAACCGCCGCAGTTTCGACTCCTGCTAATAGTTTAGCGCACTCTTTGTTGTTACTATGGGGTCCTGAAGCACAAGGGGATTTTACTCGTTGGTGTCAATTAGGCGGTCTTTGGACTTTTGTTGCTCTCCACGGTGCTTTCGGACTAATAGGGTTCATGTTACGTCAATTTGAGCTT…
Corynonema pungens	OL591216	0.5035	0.395	48.1877	psbC	GTGGAAACGCTCTTTAATGGAACTTTATCTGTAGCAGGTCGTGACCAAGAAACCACCGGTTTTGCTTGGTGGGCCGGAAATGCCCGACTTATCAATTTATCCGGTAAACTGCTAGGCGCTCATGTAGCCCATGCTGGATTAATCGTATTCTGGGCCGGAGCAATGAACCTATTTGAAGTGGCTCATTTCGTACCAGAAAAGCCCATGTATGAACAAGGATTAATTTTACTTCCCCACCTAGCTACTCTAGGCTGGGGGGTAGGTCCTGGTGGTGAAGTTATAGACACCTTTCCATACTTTGTATCTGGAGTACTTCACTTAATTTCCTCTGCTGTATTGGGGTTTGGCGGTATTTATCATGCCCTTCTGGGACCTGAGACTCTTGAAGAATCTTTTCCA…
Corynonema pungens	OL591216	0.5	0.3488	58.6463	psbZ	ATGACTATTGCTTTCCAATTGGCTGTTTTTGCATTAATTGCCACTTCATCAATCTTACTGATTAGTGTACCCGTTGTATTTGCTTCTCCGGATGGTTGGTCGAGTAACAAAAATGTCGTATTTTCTGGTACATCAGTGTGGATTGGATTAGTCTTTCTGGTGGGTATCCTTAATTCTCTCATCTCTTAA
Corynonema pungens	OL591216	0.7576	0.5441	48.7664	rps14	ATGGCAAGGAAAAGTTTGATTCATAGAGAGAAGAAAAGGAAAAAGTTGGAACAAAAATATCATTTGATTCGTCGATCCTCAAAAAGAGAAATAAACAAAGTTCCGTCGTTGAGCGATAAATGGAAAATTCATGGAAAGCTACAATCCTCACCGCGTAATAGTGCACCTACACGTTTTCATCGACGTTGTTTTTCGACCGGAAGGCCGAGAGCTAACTATCGAGATTTTGGACTATCCAGGCACAAACTTCGTGAAATGGTTCATGCATGTTTGTTGCCGGGGGCAACAAGATCAAGTTGGTAA
Corynonema pungens	OL591216	0.5375	0.3778	51.0727	psaB	ATGGCATTAAGATTTCCAAGGTTTAGCCAAGGCTTAGCTCAGGACCCCACTACTCGTCGTATTTGGTTTGGTATTGCTACCGCACATGACTTCGAGAGTCATGATGATATTACTGAGGAACGTCTTTATCAGAATATTTTTGCTTCTCACTTCGGGCAATTAGCAATCATTTTTCTGTGGACTTCCGGAAATCTCTTTCATGTAGCTTGGCAAGGAAATTTTGAAGCATGGGTACAGGACCCTTTACATGTAAGACCTATTGCTCATGCTATTTGGGATCCTCATTTTGGTCAACCGGCCGTGGAAGCTTTTTCTCGGGGGGGTGCTCTTGGCCCGGTGAATATCGCTTATTCTGGTGTTTATCAGTGGTGGTATACAATCGGTTTACGCACTAATGAA…
Corynonema pungens	OL591216	0.5188	0.4144	53.0532	psaA	ATGATTATTCGTTCGCCGGAACCAGAAGTAAAAGTTTTGGTAGATAGGGATCCCGTAAAAACTTCTTTCGAGGAATGGGCCAGACCGGGTCATTTCTCAAGAACCATAGCTAAGGGACCCGACACTACCACTTGGATCTGGAACCTACATGCTGATGCTCACGACTTCGATAGCCATACCAGTGATTTGGAGGAGATCTCTCGAAAAGTATTTAGTGCCCATTTCGGACAACTCTCCATCATTTTTCTTTGGCTGAGCGGCATGTATTTCCACGGTGCTCGTTTTTCCAATTATGAAGCCTGGCTAAGTGATCCTACTCACATTGGACCCAGTGCACAGGTGGTTTGGCCAATAGTGGGCCAAGAAATATTGAACGGTGATGTGGGCGGGGGTTTCCGA…
Corynonema pungens	OL591216	0.5714	0.4649	45.0553	ycf3	ATGCCTAGATCGCAGATAAATGGAAATTTTATTGATAAGACTTTTTCAGTTGTAGCCAATATATTATTACGAATAATTCCGACAACTTTAGGAGAAAAAAGGGCATTTAGCTATTACAGAGATGGTGCGATGTCAGCTCAATCTGAAGGCAATTATGCGGAAGCTTTACAGAATTATTATGAAGCTATGCGACTCGAAATTGATCCGTACGATCGAAGCTATATACTCTATAACATAGGCCTTATCCACACAAGTAACGGAGAACATACAAAAGCTTTAGAATATTATTTTCGAGCACTCGAACGAAATCCATTCTTACCACAAGCTTTTAATAATATGGCTGTGATCTGTCATTACCGGGGAGAACAGGCCGTTCGGCAGGGAGATTCGGAAATTGCG…
Corynonema pungens	OL591216	0.4909	0.4898	58.498	rps4	ATGTCACGTTACCGAGGGCCTCGTTTCAAAAAAATACGCCGTCTGGGGGCTTTGCCGGGACTAACGGGTAAAGGTCCTAGGGCCGGAAGCGATTTTAGAAACCAATTACGCTCCGGAAAAAAATCTCAATATAGAATTCGTTTAGAAGAAAAACAAAAATTGCGTTTTCATTATGGTCTTACAGAACGACAATTACTTAAATATGTTCGTATCGCCGGAAAAACCAAAGGGTCAACCGGTCTGGTTTTACTACAATTACTTGAAATGCGTTTGGATAACATTCTTTTTCGGTTGGGTATGGCTTCAACTATTCCTCAAACCCGCCAATTAATTAACCATCGACATATTTTAGTTAATGGGCGTATAGTCGATATACCAAGTTATCGTTGCAAACCCCGA…
Corynonema pungens	OL591216	0.6863	0.3981	51.8825	ndhJ	ATGCAGGGTCGTTTGTCTGCTTGGCTAGTTAAGCATGGGATAGTTCATAGATCTTTGGGCTTCGATTACCAAGGGATAGAAACTTTACAAATAAAGCCCGAGGATTGGCATTCCGTTGCTGTCATTTTGTATGTATATGGTTACAATTATCTACGGTCCCAATGTGCCTATGATGTAGCACCGGGTGGACTGCTGGCCAGTGTGTATCATCTTACGCGAATAAAGTATGGTGTAGATCAACCTGAAGAGGTATGCATAAAAGTATTTGCTCCAAGGAGTAATCCTAAAATTCCATCTGTTTTCTGGGTTTGGAAAAGTGCGAATTTTCAAGAACGGGAATCTTATGATATGTTGGGAATCTTTTATGATAATCATCCACGACTGAAACGTATTTTAATG…
Corynonema pungens	OL591216	0.5224	0.4367	59.2143	ndhK	ATGAATTCCATTGAATTTTCTTTACTTGATCGAACAACCCCAAATTCTTTTATTTCAACTACACCAAACGATCTTTCCAATTGGTCAAGACTCTCCAGTTTATGGCCGCTTCTTTATGGTACCAGTTGTTGTTTCATTGAATTTGCTTCATTAATCGGCTCGCGGTTCGATTTTGACCGTTATGGACTGGTACCAAGATCGAGCCCTAGACAGGCGGACCTAATTTTAACAGCCGGTACCGTAACAATGAAAATGGCTCCTTCTTTAGTGAGATTATATGAACAAATGCCTGAACCAAAATATGTTATTGCTATGGGAGCATGTACAATTACAGGGGGGATGTTCAGTACTGATTCGTATAGTACTGTTCGGGGAGTTGATAAGCTAATTCCTGTGGAT…
Corynonema pungens	OL591216	0.6364	0.4205	44.1074	ndhC	ATGTTTCTGCTTTACAAATATGATATTTTCTGGGCATTTCTAATAATATCAAGTGTTATTCCTATTTTAGCATTTCGAATTTCCGCAGTTTTAGCCCCGATTAACAAAGGGCCAGAGAAACTTTCTGGTTATGAATCGGGTATAGAACCAATGGGCGATGCTTGGTTACAATTTAGAATCCGGTATTATATGTTTGCTCTAGTTTTTGTTGTTTTTGATGTTGAAACCGTTTTTCTTTATCCATGGGCAATGAGTTTTGATATATTGGGGGTATCCGTATTTATAGAAGCTTTCATTTTCATGCTTATCTTAATTGTTGGTTCAGTTTATGCGTGGAGAAAAGGAGCATTAGAGTGGTCTTAG
Corynonema pungens	OL591216	0.5652	0.5057	61	atpE	ATGACCTTAAATCTTTGTGTACTGACCCCGAATCGAATTGTTTGGGATTCAGAAGTGAAAGAAATCATTTTATCGACCAATAGTGGACAAATAGGCGTATTACCAAATCACGCGCCTATTGCCACAGCTGTAGATATAGGTATTTTAAGAATCCGCTTTAACGACCAATGGGTAACGATGGCTCTGATGGGCGGTTTTGCTAGAATAGGGAATAATGAGATCACTATTTTAGTAAATGATGCGGAGAAGAGTAGTGACATTGATCCCCAAGAAGCCCAGCAAACTCTTGAAATAGCGGAAGCTAACTTGAGGAAAGCTGAAAGCAAGAGACAAACAATTGAGGCAAATCTAGCTCTCAGACGAGCTAGGACACGAGTAGAGGTTATCAATGCGATTTGA
Corynonema pungens	OL591216	0.525	0.4838	50.8594	atpB	ATGAGAATAAATCCTACTACTTCCGGCCCTGGGGTTTCCGCGCTTGCAAAAAAAAAACCGGGACATATTGCTCAAATCATTGGTCCGGTACTGGATGTAGCCTTTCCCCCCGGGAAGATGCCTAATATTTACAATGCTCTAGTAGTTAAGAGTCGAGATACTGCCGGTCAACCAATTAATGTGACTTGCGAGGTACAGCAATTATTAGGGAATAATCGGGTTAGAGCTGTAGCCATGAGTGCTACAGATGGTCTAACGAGAGGGATGGAAGTAATTGACACGGGAGCTCCTCTAAGTGTTCCAGTCGGCGGAGCGACTCTAGGACGAATTTTCAACGTGCTTGGAGAGCCTGTTGATAATTTAGGTCCTGTAGATACCCGCACAACATCCCCTATTCAT…
Corynonema pungens	OL591216	0.4744	0.425	53.6217	rbcL	ATGTCACCACAAACAGAGACTAAAGCTAGTGTTGGATTCAAAGCCGGCGTTAAAGATTATAAATTGACTTATTATACTCCTGACTATGTAACCAAAGATACTGATATCTTGGCAGCATTCCGAGTAAGTCCTCAACCCGGAGTTCCACCTGAGGAAGCGGGGGCTGCAGTAGCTGCAGAATCTTCTACCGGTACATGGACAACTGTGTGGACCGATGGGCTTACCAGCCTTGATCGTTACAAAGGGCGATGCTACAACATTGAGCCCGTTGCTGGAGAAGAAAATCAATATATATGTTATGTAGCTTACCCGTTAGACCTTTTTGAAGAAGGTTCTGTTACTAACATGTTTACTTCCATTGTGGGTAATGTATTTGGTTTCAAAGCCCTGCGCGCTCTA…
Corynonema pungens	OL591216	0.5646	0.339	45.9712	accD	ATGAAAAAAAGGTGGTTCAATTTGATGTTATCTAAGGGTAAGGGAAAAGGGGAATTAGAATACAGGTGTGGGTTAAGTAAATCAACGGATAGTCTTGGTCCTATTAAAAATACCAGTGTAAGCGAGGATCCGATTCGAAATGATAAGGATAAAAACATTCACAGTTCGAGTGATAGGGACTGTTCGAGTTACATCAATTTAGCTGGTGTCAGGGACATTCGTAATTTCATTTCGGATGACACCTTTTTTGTTAAGGATAGTAATAGGGACAGCTATTCCATATATTTTGATATTGAAAATCAAATTTTGGAAATAGACAATGATCATTCTTTTCTGAGTGAACTAGAAAGTTCTTTTTATAGCTTTCGTAATTATAGTTCTAGGAATACTGGATCCAAA…
Corynonema pungens	OL591216	0.5385	0.44	61	psaI	ATGACAATTCTCAACAGCTTTCCCTCCATTTTAGTGCCTTTAGTGGGCCTAGTATTTCCGGCAGCGGCAATGGCTTCTTTATTTCTTTATCTTGAAAAAAATAAGATTTTTTAA
Corynonema pungens	OL591216	0.5323	0.4228	54.2735	ycf4	ATGAGTTGGCGATCAGAATATATATGGATAGAATTTATAGCAGGCTCTCGCAAAACAAGCAATTTCTGCTGGGCCCTTATCCTTTTTTTAGGTTCATTAGGATTCTTAGTGGTTGGAATTTCTAGTTATCTTGATAGGAATTTGCTATCTTTATTTCCGTCTCAGCAAATCCAATTTTTTCCACAAGGGATCGTGATGTCTTTCTACGGGATCGCGGGTCTCTTTATTAGTTCCTATTTGTGGTGCACAATTACATGGAATGTAGGTAGCGGTTATGATCGATTTGATACAAAAGAGGGAATAGTTTGTATTTTTCGTTGGGGATTTCCTGGAAAAAATCGCCGCATCTTTCTACGATTCCTTATGAAAGATATTCAGTCCATTCGAATAGAAGTTAAA…
Corynonema pungens	OL591216	0.5068	0.4146	55.7896	cemA	ATGACAAAAAAAAAAACGAACGCATCTATTCCCCTTAGATATCTTTCATCTATAGTATTTTTAGTATTTTTGCCCTGGTGTATCCCTCTCTCATTTAATAAAAATCTGGAATCTTGGGTTATTAATTGGTGGAATACTAGTCAACCCGAAACCTTTTTGAATGATATTCAAGAAAAAGTTGTTCTAGAAAAATTCATAGAATTGGAGGAATTATTCTTCTTGGACGAAATGATAAAGGAATTTACGGAAAGACGTCTAGAAAAGCTTCGTATAGGGATAGAGCTCCCGAAAGAAACAATTGAATTAATCAAGATGCACGATGAGGATCATATCCATACGATTTTTCACTTCTCGACAAATACAATCTGCTTCGTTATTCTAAGTGGTTATTCGATTCTG…
Corynonema pungens	OL591216	0.6038	0.4465	60.3769	petA	ATGCAAATTCGAAATACCTTTTCTTCGTTAAAGGGAGAGATTACTCAATTCATTTCCGTATCTCTCATGATATATATAATAACTCAGGCATCAATTTCAAATGCATATCCCGTTTTTGCGCAGCAGAGTTTTGAAAATCCACGAGAGGCAACTGGTCGCATTGTATGCGCCAATTGTCATTTAGCTAATAAGCCTGTGGATATTGAGGTTCCACAGGCGATACTCCCGGATACTGTATTTGAAGCAGTTGTTAGAATTCCGTATGATATGCAACTGAAACAAATTCTTGCTAATGGTAAAAAGGGTTCTTTGAATGTGGGGGCCGTTCTTATTTTACCAGAGGGGTTTGAATTAGCCCCCTCCAACCGTATTTCGCCCGAGATGAAAGAAAAGATAGGC…
Corynonema pungens	OL591216	0.5	0.3333	22.9529	psbJ	ATGGCCGATACTACTGGAAGGATTCCCCTTTGGATAATAGGTACTGTAACTGGTATTCCTGTGATCGGTTTAATAGGCATTTTCTTTTATGGTTCATATTCCGGATTAGGTTCGTCCTTGTAG
Corynonema pungens	OL591216	0.3125	0.4783	61	psbL	ATGACACAATCAAACCCGAACGAACAAAATGTTGAATTGAACCGTACCAGTCTCTACTGGGGGTTATTACTCATTTTTGTACTTGCTGTTTTATTTTCCAATTACTTCTTCAATTAA
Corynonema pungens	OL591216	0.5714	0.6154	55.2727	psbF	ATGACCATAGATCGAACCTATCCAATTTTTACAGTACGATGGTTGGCTGTGCACGGACTAGCTGTACCTACCGTTTCTTTTTTGGGGTCAATATCAGCAATGCAGTTCATCCAACGATAA
Corynonema pungens	OL591216	0.3929	0.4107	54.1864	psbE	ATGTCTGGAAGCACAGGAGAACGTTCTTTTGCTGATATTATTACCAGTATTCGATACTGGGTCATTCATAGCATTACTATACCTTCCCTATTCATTGCGGGTTGGTTATTCGTCAGCACGGGGTTAGCTTACGATGTGTTTGGAAGCCCTCGTCCAAACGAGTATTTTACAGAGAGACGACAAGGAATTCCATTAATAACCGGCCGTTTTGATTCTTTGGAACAACTCAACGAATTTAGTAGATCTTTTTAG
Corynonema pungens	OL591216	0.5714	0.36	34.6842	petL	ATGCCCACTATAACTAGTTATTTTGGTTTTCTCCTAGCAGCTTTAACTATAACCTCGGCTCTATTTATTGGTCTGAGTAAGATAGGACTTATTTGA
Corynonema pungens	OL591216	0.4	0.4643	61	petG	ATGATTGAAGTCTTTCTATTTGGAATTGTCTTAGGTCTAATTCCTATTACTTTGGCTGGATTATTCGTAACCGCATATTTACAATACAGACGTGGTGATCAGTTGGACCTTTGA
Corynonema pungens	OL591216	0.6667	0.5333	61	psaJ	ATGCGAGATCTAAAAACATATCTTTCCGTGGCACCGGTACTAAGTACTTTATGGTTCGGGTCTTTAGCAGGGTTATTGATAGAAATTAATCGTTTATTCCCGGACGCATTGACATTTCCTTTTTTTTATTTCTAG
Corynonema pungens	OL591216	0.6316	0.4375	33.9309	rpl33	ATGGCCAAGGGGAAAGATGTTCGAGTAAGGGTTATTTTGGAATGTACTAGTTGTGTTCGAAACGGTGTTAATAGGGAATTAAGGGGTATTGCCAGATATATTACTCAAAAGAATCGACACAATACACCTAGTCGATTGGAATTGAGAAAATTCTGTTTCTATTGTTACAAACATACACTTCATGGGGAGATAAAAAAATAA
Corynonema pungens	OL591216	0.6538	0.4868	54.4313	rps18	ATGGATAAAACCAAGCGACTCTTTCTTAAAACCAAGCGATCTTTTCGTAGGCGTTTGCCCCCGATTGTATCGGGGGATCGAATTGATTATAGAAACATGACTTTAATTAATCGATTTCTTAGTGAACAAGGAAAAATATTATCTAGACGGGTGAATAGATTGACCTTAAAAGAACAACGATTAATTACTATTGCTATAAAACAAGCTCGTATTTTATCTTCGTTACCTTTTCTTAATAATGACAAGCAATTTGAAAGAAGTGGGCCGATCACTAGACCTCCAGGTCTTCGAACCAGAAAAAAATAG
Corynonema pungens	OL591216	0.7105	0.4818	49.5003	rpl20	ATGACCAGAATTAGACGAGGATATATAGCTCGGAGACGTAGAACAAAAATGCGTTTATTTGCATCAAGTTTTCGCGGGGCTCATTCAAGACTTAGTCGAACAAGTACTCAACAGAAAATAAGAGCTTTGGTTTCGGCTCATCGTGATAGAGATAGACAAAAAAGGGATTTTCGCCGTTTGTGGATCACTCGAATAAATGCAGTAATTCGCGTAAATAGGGTATCCTTTATTTATATTTATAGTAGATTAATGCACAATCTGTATAAGGCGCAGTTGGTTCTTAATCGTAAGATACTTGCACAAATAGCTATATCAAATAGGAATTGTCTTTATATGATTTCCAGTGAAATCCTAAAAAAAGGAAATTGGAAGGAGTCCATTCTAATTTTTAAACGGAGT…
Corynonema pungens	OL591216	0.3793	0.4754	59.2451	rps12	CTACAACGCACTAGAACGCCCTTGTTGACGATCCTTTACTCCGACAGCATCTAGGGTTCCTCGAACAATGTGATATCTCACACCGGGTAAATCCTTAACCCTCCCCCCTCTTACTAAGACTACAGAATGTTCTTGTGAATTATGGCCAATACCAGGTATATAAGCAGTGATTTCAAACCCAGAGGTTAATCGTACTCTGGCAACTTTACGTAAGGCAGAGTTTGGTTTTTTGGGGGTGATAGTATGCCAACTATTAAACAACTTATTAGAAACCCAAGACAGCCAATCAGAAACGTTACAAAATCCCCCGCTCTTGTGGGATGCCCTCAGCGCCGAGGAACATGTACAAGGGTGTAT
Corynonema pungens	OL591216	0.5211	0.488	61	clpP1	ATGCCTATTGGTGTTCCAAAAGTACCCTATCGAAGTCCTGGGGACAAACATCCATCTTGGATTGACATCAACCGACTTTATCGAGAAAGATTACTTTTTTTAGGTCAAATGGTTGAGAGTGATATCTCGAATCACCTTATTGGTATTATGGTATATCTCAGTATAGAGAACGAGACCAAGGATTTGTATTTATTTATCAACTCTCCTGGCGGATGGGTAATACCCGGAATAGCAATTTATGATACTATGCAATTTGTGCGACCAGATGTACAGACAATATGCATGGGATTGGCCGCCTCCATGGGGTCTTTTCTCCTGGCCGCGGGAGCAAGTACCAAACGTCTAGCATTCCCTCACGCTAGGGTCATGATCCATCAACCTTTTGGCGCTTTTTATGGG…
Corynonema pungens	OL591216	0.5031	0.4277	51.0342	psbB	ATGGGTTTGCCTTGGTATCGTGTTCATACCGTCGTATTGAATGATCCCGGTCGTTTGATTGCTGTCCATATAATGCATACAGCCCTGGTTGCGGGTTGGGCCGGTTCAATGGCTCTATATGAATTAGCTGTTTTTGACCCCTCCGATCCAGTTCTTGATCCAATGTGGAGACAAGGCATGTTCGTTATACCCTTCATGACTCGTTTAGGAATAACCGATTCATGGGGCGGTTGGAGTATTACGGGGGGGACGGTAACGAATCCGGGTATTTGGAGTTACGAAGGTGTAGCCGGGGCACATATTGTGTTTTCGGGCTTGTGCTTCTTGGCAGCTATCTGGCATTGGGTGTATTGGGATCTAGCAATATTTGTTGATGACCGTACGGGAAAACGCTCTTTG…
Corynonema pungens	OL591216	0.4545	0.5217	43.1429	psbT	ATGGAAGCATTGGTTTATACATTCCTCTTAGTCTCGACTCTAGGGATCATTTTTTTCGCTATCTTTTTTCGAGAACCGCCTAAAGTTCCAACTAAAAAATAA
Corynonema pungens	OL591216	0.4118	0.5556	59.6364	psbN	ATGGAAATAGCAACCCTAGTCGCCATCTCTATATCTGGGTTACTTGTAAGTTTTACTGGGTACGCCTTATATACTGCTTTTGGGCAACCCTCTCAACAACTAAGAGATCCATTCGAGGAACACGGGGACTAG
Corynonema pungens	OL591216	0.84	0.3878	61	psbH	ATGGCTGCACAAACAGTTGAGGGTAGTTCTAGAGCTCGTCCAAAAATGACTTCTGCGGGGGGGTTATTGAAACCTTTGAATTCGGAATATGGTAAAGTAGCTCCTGGATGGGGAACTACTCCTTTGATGGGTATCGCAATGGCTCTATTTGCGATATTCCTGTCTATTATTTTGGAGATTTATAATTCGTCCGTTTTACTGGACGGAATTTCAATGAATTAG
Corynonema pungens	OL591216	0.5758	0.42	55.1321	petB	ATGAGTAAAGTATACGATTGGTTCGAAGAACGGCTCGAGATTCAGGCGATTGCAGATGATATAACTAGTAAATACGTTCCTCCTCATGTCAACATATTTTATTGTCTAGGAGGAATTACGCTTACTTGTTTTTTAGTACAAGTAGCTACAGGGTTTGCTATGACTTTTTACTACCGTCCGACCGTTACTGAGGCTTTTGCTTCTGTTCAATACATAATGACGGAAGTTAACTTTGGTTGGTTAATCCGATCAGTTCATCGATGGTCGGCAAGTATGATGGTCCTAATGACAATCCTGCACGTATTTCGTGTTTATCTCACTGGTGGTTTTAAAAAACCTCGCGAATTGACTTGGGTTACAGGCGTGGTTCTGGCTGTATTGACCGCATCTTTTGGCGTA…
Corynonema pungens	OL591216	0.5333	0.5086	49.1074	petD	ATGGGAGTAACAAAAAAACCTGACTTGAACGATCCTGTATTAAGGGCTAAGTTGGCTAAAGGTATGGGTCATAATTATTATGGAGAACCCGCATGGCCCAACGACCTTTTATATATTTTTCCGGTAGTAATTCTAGGCACTATTGCATGTAGCGTGGGCTTAGCGGTTCTAGAACCATCAATGATTGGTGAACCCGCAGATCCGTTTGCAACTCCTTTGGAAATATTACCCGAATGGTATTTCTTTCCTGTATTTCAAATACTTCGTACAGTACCCAATAAGCTGTTGGGTGTTCTTTTAATGGTTTCAGTACCTGCGGGATTATTAACAATACCCTTTTTAGAAAATGTTAATAAATTCCAAAATCCATTTCGCCGTCCAGTAGCGACAACCATCTTT…
Corynonema pungens	OL591216	0.5347	0.48	56.2211	rpoA	ATGGTTCGAGAGAAAGTCAAAGTATCTACTGGGACACTACAGTGGAAGTGTGTTGAATTAAGAGCCGACAGTAAGCGTCTTTATTATGGACGCTTTATTTTGTCTCCACTTATGAAAGGTCAAGCCGACACAATAGGCATTGCGATGCGAAGAGTTTTGCTTGGGGAAATAGAAGGAACGTGTATTACACGCGCAAAATCTGAGAAAATCCCACATGAATATTCTACCATAGTGGGGATTCAAGAATCGGTACATGAAATTTTAATGAATTTGAAAGAAATTGTATTGAGAAGTAATCTTTATGGAATTTGTGACGCGCTTATTTGTGTCAAAGGTCCGGGATATGTAACTGCTCAAGACATCCTCTTGCCACCCTCTGTGGAAATCATTGATAAGACG…
Corynonema pungens	OL591216	0.5581	0.4792	61	rps11	ATGACAAAATCTACAACAAGAAGCGGTTCACGTAGGACTGGACGGATTGGTTCTCGTAAAAGTGGGCGTCGAATACCAAAGGGCGTGATTCATGTTCAAGCAAGTTTCAACAACACCATTGTGACTGTTACGGATGTACGGGGTCGGGTAATTTCTTGGTCCTCGGCCGGTACTTGTGGATTCAGGGGTACAAGAAGAGGTACGCCCTTTGCTGCTCAAACCGCAGCAGGAAGTGCTATTAGAGCAGTGGCGGATCAAGGTATGCAACGAGCAGAAGTCATGATAAAGGGTCCTGGTCTCGGAAGAGATGCAGCATTGCGAACTATTCGTAGAAGCGGTATCCTTTTAAATTTCGTACGGGATGTAACCCCTATGCCACATAATGGTTGCAGACCCCCT…
Corynonema pungens	OL591216	0.6154	0.64	22.75	rpl36	ATGAAAATAAGGGCTTCCGTTCGGAAAATTTGTGAAAAATGTCGACTGATCCGCAGGAGGGGACGGATTATAGTAATTTGTTCCAACCCGAGACATAAACAAAGACAAGGATAA
Corynonema pungens	OL591216	0.5	0.5484	45.4281	rps8	ATGGGTAAGGACACTATTGCTGACATAATAACTTGTATACGAAATGCTGACATGAATCGAAAAGGAACGGTTCGAATAGCATCTACTAACATCGCCGAAAACTTTGTTAAAATACTTTTGCGAGAGGGTTTTCTAGAAAACGTAAGGAAGCTCGTGGAAAACAAAAAAGAGTTTTTGGGTTTAACCCTACGACATAGAAGGAATAGGAAAGGACTATATAGACCCATTTTAAATTTAAAACGAATCAGTCGACCCGGTTTACGAATCTATTTTAACTATGAACGAATTCCTAGAATTTTAGACGGGATGGGGATTGTAATTCTCTCTACTTCTCGGGGTATAATGACAGACCGAGCGGCTCGACTAGAAAGAATCGGCGGAGAAATTTTGTGTTATATA…
Corynonema pungens	OL591216	0.5429	0.4659	51.669	rpl14	ATGATTCAACCTCAAACCCATTTGAATGTAGCGGACAATAGCGGTGCCCGAGAATTGATGTGTATTCGAATCATAGGAGCCAGTAATCGTAGATATGCTCATATTGGTGACGTTATTGTTGCTGTGATCAAGGAAGCAGTACCAAATACGCCTCTAGAAAGATCCGAGGTGATCAGGGCTGTAATTGTACGTACTTGTAAAGAACTCAGACGAGGTAGCGGTATGATAATACGTTATGATGACAATGCTGCAGTTGTCATTGATCAAGAAGGAAATCCAAAGGGAACTCGAATTTTTGGTGCGATCGCCCGAGAATTGAGGCAGTTGAATTTTACTAAAATAGTTTCATTAGCGCCTGAAGTATTATAA
Corynonema pungens	OL591216	0.4762	0.5684	53.716	rpl16	ATGCTTAGTAACCCCCAAAGAACAAGATTCCGTAAACAACATAGAGGAAGAATGAAAGGAATATCTTATCGAGGTAATCATATTAGTTTCGGTAGATATGCTCTTCAAGCACTTGAACCCGCTTGGATCACATCTAGACAAATCGAAGCAGGGCGCCGAGCAATGACACGCAATGTACGGCGTGGTGGAAAAATATGGGTACGTATATTTCCAGACAAACCAGTTACAGTAAGACCCACGGAAACCCGTATGGGGTCCGGGAAAGGATCCCCCGAATATTGGGTAGCTGTCGTTAAACCGGGTAGAATCCTTTATGAAATGAGTGAAGTCGCCGAGAATATCGCTCGAAGGGCTATTTCAATAGCGGCGTCCAAAATGCCTATAAGAACTCAATTCATT…
Corynonema pungens	OL591216	0.4286	0.5899	43.6133	rps3	ATGGGACAAAAAATAAATCCACTTGGTTTCCGACTTGGTACAACACAAAGTCATCATTCGCTTTGGTTTGCAAAACAAAAAAATTATTGCGAAGGTCTACAAGAAGATCAAAAAATACGAAACATTCTTAAGAATTATGTACAAAAAAATATGATAATATCCTCCGATCTTGAAGGAATTGACCGGATAGAGATTCAAAAAAGAATTGATCTAATTCAAGTCATAATATATATAGGATTTCAAAAATTTTTACTAGAAAATAGACCACGAAGAGTTGAAGAATTACAGATGAATGTACAAAAAGAGCTTAATTGTGTGAACCGAAAAATAAACATTGCTATTACAAGAATTGCAAATCCTTATGGACACCCCAATATTCTTGCCGAATTTATAGCCGAC…
Corynonema pungens	OL591216	0.6471	0.4242	50.4225	rpl22	ATGATAAGGATAATAAAGAAGAAGGTCGAAGTATCTGCTTTAGGTAAACATATATGTATGTCTGCTCACAAAGCCCGAAGGGTAATTGATCAGATTCGTGGACGTTCTTACGAGGGGAGCACTTATGATACTCGAACTCATGCCTTATAG
Corynonema pungens	OL591216	0.56	0.4853	50.6917	rps19	GTGACACGTTCACTCAAAAAAAATCCTTTTGTGGCGAATCATTTATTAAGAAAAATCGATAAGCTTAATACAAAAGCGGAAAAAGAAATAATAATAACTTGGTCCCGGGCATCTACCATTATACCCACAATGGTCGGACATACTATTGCTATCCATAATGGAAGGGAGCATTTGCCTATTTATATAACAGATCGTATGGTAGGACATAAATTGGGAGAATTTGCGCCCACTATCAATTTCCGTGGACATGCAAAAAATGATAATAGATCCCGTCGTTAA
Corynonema pungens	OL591216	0.4945	0.5108	55.4198	rpl2	ATGGCGGTACATTTATACAAAACTTCTACCCCGAGCACACGCAATGGAGCCGTAGACAGTCAAGTGAAATCCAATCCACGAAATAATTTGATCTATGGACAGCATCGTTGTGGTAAAGGTCGTAATGCCAGAGGAATCATTACCGCAGGGCATAGAGGGGGAGGTCATAAGCGTCTATACCGTAAAATCGATTTTCGACGGAAGGAAAAAGAAAAAGACATATATGGTAGAATCGTAACCATAGAATACGACCCTAATCGAAATGCATACATTTGTCTCATACACTATGGGGATGGTGAGAAGAGATATATTTTACATCCCAGAGGGGCTATAATTGGAGATACCATTGTTTCTGGTACAGAAGTTCCTATAAAAATGGGAAATGCCCTACCTTTGACC…
Corynonema pungens	OL591216	0.5926	0.5075	61	rpl23	ATGGATGGAATCAAATATGCAGTATTTACAGACAAAAGTATTCGGTTATTGGGGAAAAATCAATATACTTCTAATGTCGAATCAGGATCAACTAGGACAGAAATAAAGCATTGGGCCGAACTCTTCTTTGGTGTCAAGGTAATAGCTATGAATAGTCATCAACTCCCCCGAAGGGGTAGAAGAATGGGACCTATTATGGCACATACAATGCATTACAGACGTATGATCATTACACTTCAACCGGGTTATTCTATTCCACCTCTTAGAAAGAAAAGAACTTAA
Corynonema pungens	OL591216	0.5316	0.4386	53.7464	ycf2	ATGAAAGGACATCAATTCAAATCCTGGATTTTCGAATTGAGAGAGATATTGAGAGAGATCAAGAATTCTCACTATTTCTTAGATTCATGGACCCAATTCAATTCAGTGGGATCTTTCATTCACATTTTTTTGCACCAAGAACGTTTTATAAAACTCTTGGACCCACGAATTTTGAGTATCCTACTTTCACGCAATTCACAGGGTTCAACAAGCAATCGATATTTCACGATCAAGGGTGTAGTACTTTTTGTAGTAGCGATCCTTATATATCGTATTAACAATCGAAATATGGTCGAAAGAAAAAATCTCTATTTGACAGGGCTTCTTCCTATACCTATGAATTCCATTGGACCCAGAACTGATACATTGGAAGAATCTTTTGGGTCTTCCAATATCAAT…
Corynonema pungens	OL591216	0.6	0.6774	53.6316	ycf15	ATGCTACTGCTGAAACATAGAAGAATTGAAATCTTAGATCAAAACACTATGTATGGATGGTATGAACTGCTTAAACAAGAATTCTTGAACAGCGAACCGCCAGAGCTATTACTAACTACATCAAAAAATTTCCATTAA
Corynonema pungens	OL591216	0.4268	0.4611	51.5032	ndhB	ATGATCTGGCATGTACAGAATGAAAACTTCATTCTCGATTCTACGAGAATTTTTATGAAAGCCTTTCATTTGCTTCTCTTCGATGGAAGTTTGATTTTCCCAGAATGTATCCTAATTTTTGGCCTAATTCTTCTTCTGATGATCGATTCAACCTCTGATCAAAAAGATATACCTTGGTTATATTTCATCTCTTCAACAAGTTTAGTAATGAGCATAGCGGCCCTATTGTTCCGATGGAGAGAAGAACCTATGATTAGCTTTTCGGGAAATTTCCAAACGAACAATTTCAATGAAATCTTTCAATTTCTTATTTTACTATGTTCAACTCTATGTATTCCTCTATCCGTGGAATACATTGAATGTACAGAAATGGCTATAACAGAGTTTCTGTTATTCGTA…
Corynonema pungens	OL591216	0.5128	0.5726	44.6844	rps7	ATGTCACGTCGAGGTACTACAGAAGAAAAAGCTGCAAAATCCGATCCAATTTATCGTAATCGCTTAGTTAACATGTTGGTTAACCGTATTCTGAAACACGGAAAAAAATCATTGGCTTATCAAATTATCTATCGAGCCTTGAAAAAGATTCAACAAAAGACAGAAAAAAATCCACTATCTGTTTTACGTCAAGCAATACGTGGAGTAACTCCCGATATAGCAGTAAAAGCAAGACGTGTAGGCGGATCGACTCATCAAGTTCCCATTGAAATAGGATCCGCACAAGGAAAAGCACTTGCCGTTCGTTGGTTATTAGGGGCATCCCGAAAACGTCCGGGTCGAAATATGGCTTTCAAATTAAGTTCCGAATTGGTGGATGCTGCCAAAGGGAGTGGCGAT…
Corynonema pungens	OL591216	0.9231	0.4444	34.8773	rpl32	ATGGCAGTTCCAAAAAAACGTATTTCTATATTAAAAAAACGTATTCGTAAGAATATTTGGAAAAAAGGTGGGGGTTGGGCAGCGTTGAAGTCTTTTTCGTTAGCGAAATCCCTTTCTACTGGGAATTCAAAAAGTTTTTTTTTGTAA
Corynonema pungens	OL591216	0.5109	0.4602	51.5415	ccsA	ATGATCTTTTCAACTTTAGAGCATATATTAACGCATATATCCTTTTCGGTCGTTTCAATTGGAATCCCGCTATATTTACTAACCTTATTAGTCGACGAAATAAGAGGACTATATGATTCATCAGAAAAGGGGATGATAGCTACCGCTTTATGTCTAACAGGATTATTAATCACCCGTTGGATTTACTCGAGGCATTTCCCATTAAGTGATTTATATGAATCATTAATCTTTCTTTCGTGGAGTTTTTCCATTATTCATAGGATTTTCGATTTTAAAAATAATAGAAATCATTTAAGCGTTATAACGGCCCCAAGTGCTATTTTTACCCAAGGCTTTGCTACTTCGGGTTTTTTAACCAAAATGCATCAATCCGGAATATTAGTACCCGCTCTCCAAGTC…
Corynonema pungens	OL591216	0.4877	0.4636	52.0092	ndhD	ATTGTAGTTTTTCCGATAGCCGCGGGTTCTTTAATTTTCTTTCTCCCTTGTAGAAGCAATAAGGTGACTAGAGGATATACAATATATATATGTGTCTTAGAACTCCTTCTAATGACCTATGCGTTTTGTTATAATTTCCAATTGGACGATCTATTAATCCAGCTAGAAGAGGATTATAAATGGATCAACTTTTTTGGTTTTGACTGGCGGTTGGGAATAGATGGACTTTCCATAGGACCCATTTTACTGACGGGATTTATCACTACTTTAGCTACTTTAGCGGCTCGGCCGGTTACTCGGAATTCCCGACTATTCCATTTCCTAATGTTAGCGATGTACAGCGGTCAAATAGGATCATTTTCTTCTCGAGACCTTTTACTTTTTTTCATCATGTGGGAA…
Corynonema pungens	OL591216	0.5909	0.4667	31.8032	psaC	ATGTCACATTCAGTAAAGATTTATGATACATGTATAGGGTGTACTCAATGTGTCCGAGCTTGCCCCACAGATGTATTAGAAATGATACCTTGGGACGGATGTAAAGCAAAGCAAATTGCTTCTGCTCCAAGAACAGAGGATTGTGTTGGTTGTAAGCGATGCGAATCCGCCTGTCCAACGGATTTCTTGAGTGTTCGGGTTTATTTATGGCATGAAACAACTAGAAGCATGGGTCTAGCTTATTGA
Corynonema pungens	OL591216	0.5556	0.3733	54.683	ndhE	ATGATGCTTGAGCATGTACTTGTTTTGAGTGCCTATTTATTTTCTATTGGTATCTATGGATTGATTACAAGCCGAAATATGGTTCGGGCCCTGATGTGTCTTGAACTTATAGTAAATGCAGTTAATATCAATTTCGTAACATTCTCTGATTTTTTTGATAGTCGACAATTAAAAGGAGATATTTTCGCAATTTTTGTTATAGCTATTGCAGCCGCTGAAGCAGCTATCGGATCAGCTATTGTTTCGTCAATTTATCGTAACAGAAAATCGACTCGTATCAATCAATCGACTTTGTTGAATAAATAG
Corynonema pungens	OL591216	0.4808	0.378	59.8412	ndhG	ATGGATTTGCCTGGACCAATACATGATTTTCTTTTAGTTTTTTTGGGCTCAGGTCTTATATTAGGAGGTCTGGGAGTGGTATTATTTACCAACTCTATTTATTCTGCCTTTTCCTTGGGATTGGTTCTTGTTTGTATATCCTTATTCTATATTCTATCAAATTCCTATTTTGTAGCTGCCGCGCAACTCCTTATTTACGTGGGAGCTGTAAATGTTTTAATCATATTTGCTGTAATGTTCATGAATGGTTCAGACTATTCCAAAGACTTTCATTTGAATTTTTGGACTGTTGGTGACGGACTTACTTCCCTGGTTTGTACAAGTATTTTTTTTTCGCTAATCGCTACCATTCTAGATACGTCGTGGTACGGGATTATTTGGACTACACGACCCAACCAG…
Corynonema pungens	OL591216	0.5833	0.4167	58.3707	ndhI	ATGTTCCCTATGATAATAGGTTTCATGAATTATGGTCAACAAACAATACGAGCTGCAAGGTACATTGGTCAAAGTTTCATGATTACTTTATCCCAAGCAAATCGTTTACCTGTAAGTATTCAATATCCTTATGAAAAATTAATCACATTGGAGCGTTTTCGCGGTCGAATACATTTTGAATTTGATAAATGTATTGCTTGTGAAGTATGTGTTCGCGTATGCCCTATAGATCTGCCTGTTGTTGATTGGAAATTTGAAACAAATATTCGAAAGAAACGATTGCTTAATTACAGTATTGATTTTGGAATTTGTATTTTTTGTGGTAACTGTGTTGAGTATTGTCCAACAAATTGTTTATCAATGACTGAAGAATATGAACTTGCTACTTATGACCGTCAC…
Corynonema pungens	OL591216	0.5233	0.5018	47.299	ndhA	ATGATAATTGATACAACAGAAGTACAAGATATCAATTCTTTTTCCAGATTGGAATCCCTACAAGAAGTCTATGGGATCATGTGGGTGCTTGCCCCTATTTCGACTCCGGTAGTGGCAATCACAATAGGTGTCCTAGTAATTGTGTGGTTAGAAAGAGAAATATCTGCCGGAATACAACAACGTATTGGGCCTGAATACGCCAGTCCCTTGGGAATTCTTCAAGCTTTAGCAGATGGGACAAAACTACTTTTCAAAGAAAACCTTCTTCCATCTAGAGGAAATAGTAGTTTATTCAGTATTGGACCATCTATAGCAGTCATAGCAATTCTACTAAGTTCTTCAGTAATTCCTTTTAGTCATAACCTTGTTTTAGCGGACCTCAATATTGGTATTTTTTTA…
Corynonema pungens	OL591216	0.5826	0.4839	49.8766	ndhH	ATGAGTATACTAGCTACAGAAAAAGAATTTATGATAGTTAATATGGGACCTCACCACCCATCAATGCACGGCGTTCTTCGCCTTATAGTTACTCTAGATGGTGAAGATGTTATTGACTGTGAACCAATATTGGGTTATTTACACCGAGGGATGGAAAAAATTGCGGAAAACCGAACAATTATACAATATCTGCCTTATGTAACCCGTTGGGATTATTTAGCTACTATGTTCACCGAAGCAATAACTGTAAATGGACCCGAACTCTTGGGGAATATTCAAGTACCCAAAAGAGCCAGCTATATCCGAGTAATTATGTTGGAGTTGAGTCGTATAGCTTCCCATCTGTTATGGCTTGGCCCCTTTATGGCAGATATTGGTGCACAGACCCCTTTCTTCTAT…
Corynonema pungens	OL591216	0.6818	0.6087	47.5155	rps15	ATGGTAAAAAATTCATTCGTCTCAGTTATGTTTCAAGAAAAAAAAGAAGAAAACTGTGGATCGGTCGAATTTCAAGTATTACGTTTCACTAATAAGATACGGAGACTTACTTCACATTTAGAATTACATAGAAAAGACTATTTATCTCAAAGAGGTCTACGGAAAATTTTGGAAAAACGCCAACGTCTACTAGCGTATTTGTCAAAGAAAAATAGAGTACGTTATAAGGAATTAATTAATAAGTTGAATATTAGGGAGTCAAAAAATCGTTAA
Corynonema pungens	OL591216	0.5179	0.5141	49.3633	ycf1	ATGATTGTTCAATCTTTTATACTAGGGAATCCAGTATCCTTATGCATGAAGATAATCAATTCCGTCGTTGTGGTCGGACTCTATTATGGATTTATGACCACATTCTCCATAGGGCCCTCTTATCTCTTCCTTCTCCGAGCTCGGGTTATGGAAGAAGGAGAAGAAGGAACCGAGAAGAAGGTATCAGCAACAACTGGTTTTATTGCGGGACAGCTCATGATGTTCATATCGATCTATTATGCGCCTCTGCATCTAGCATTGGGTAGACCTCATACAATAACTGTCCTAGCTCTACCGTATCTTTTGTTTCATTTCTTCTGGAACAATCCCAAACACTTTTTTGATTATGGATCTACTACCAGACGTAATCTTAGCATTCAATGTGTATTCCTGAATAAT…
Corynonema pungens	OL591216	0.5128	0.5726	44.6844	rps7	ATGTCACGTCGAGGTACTACAGAAGAAAAAGCTGCAAAATCCGATCCAATTTATCGTAATCGCTTAGTTAACATGTTGGTTAACCGTATTCTGAAACACGGAAAAAAATCATTGGCTTATCAAATTATCTATCGAGCCTTGAAAAAGATTCAACAAAAGACAGAAAAAAATCCACTATCTGTTTTACGTCAAGCAATACGTGGAGTAACTCCCGATATAGCAGTAAAAGCAAGACGTGTAGGCGGATCGACTCATCAAGTTCCCATTGAAATAGGATCCGCACAAGGAAAAGCACTTGCCGTTCGTTGGTTATTAGGGGCATCCCGAAAACGTCCGGGTCGAAATATGGCTTTCAAATTAAGTTCCGAATTGGTGGATGCTGCCAAAGGGAGTGGCGAT…
Corynonema pungens	OL591216	0.4268	0.4611	51.5032	ndhB	ATGATCTGGCATGTACAGAATGAAAACTTCATTCTCGATTCTACGAGAATTTTTATGAAAGCCTTTCATTTGCTTCTCTTCGATGGAAGTTTGATTTTCCCAGAATGTATCCTAATTTTTGGCCTAATTCTTCTTCTGATGATCGATTCAACCTCTGATCAAAAAGATATACCTTGGTTATATTTCATCTCTTCAACAAGTTTAGTAATGAGCATAGCGGCCCTATTGTTCCGATGGAGAGAAGAACCTATGATTAGCTTTTCGGGAAATTTCCAAACGAACAATTTCAATGAAATCTTTCAATTTCTTATTTTACTATGTTCAACTCTATGTATTCCTCTATCCGTGGAATACATTGAATGTACAGAAATGGCTATAACAGAGTTTCTGTTATTCGTA…
Corynonema pungens	OL591216	0.6	0.6774	53.6316	ycf15	ATGCTACTGCTGAAACATAGAAGAATTGAAATCTTAGATCAAAACACTATGTATGGATGGTATGAACTGCTTAAACAAGAATTCTTGAACAGCGAACCGCCAGAGCTATTACTAACTACATCAAAAAATTTCCATTAA
Corynonema pungens	OL591216	0.5316	0.4386	53.7464	ycf2	ATGAAAGGACATCAATTCAAATCCTGGATTTTCGAATTGAGAGAGATATTGAGAGAGATCAAGAATTCTCACTATTTCTTAGATTCATGGACCCAATTCAATTCAGTGGGATCTTTCATTCACATTTTTTTGCACCAAGAACGTTTTATAAAACTCTTGGACCCACGAATTTTGAGTATCCTACTTTCACGCAATTCACAGGGTTCAACAAGCAATCGATATTTCACGATCAAGGGTGTAGTACTTTTTGTAGTAGCGATCCTTATATATCGTATTAACAATCGAAATATGGTCGAAAGAAAAAATCTCTATTTGACAGGGCTTCTTCCTATACCTATGAATTCCATTGGACCCAGAACTGATACATTGGAAGAATCTTTTGGGTCTTCCAATATCAAT…
Corynonema pungens	OL591216	0.5926	0.5075	61	rpl23	ATGGATGGAATCAAATATGCAGTATTTACAGACAAAAGTATTCGGTTATTGGGGAAAAATCAATATACTTCTAATGTCGAATCAGGATCAACTAGGACAGAAATAAAGCATTGGGCCGAACTCTTCTTTGGTGTCAAGGTAATAGCTATGAATAGTCATCAACTCCCCCGAAGGGGTAGAAGAATGGGACCTATTATGGCACATACAATGCATTACAGACGTATGATCATTACACTTCAACCGGGTTATTCTATTCCACCTCTTAGAAAGAAAAGAACTTAA
Corynonema pungens	OL591216	0.4945	0.5108	55.4198	rpl2	ATGGCGGTACATTTATACAAAACTTCTACCCCGAGCACACGCAATGGAGCCGTAGACAGTCAAGTGAAATCCAATCCACGAAATAATTTGATCTATGGACAGCATCGTTGTGGTAAAGGTCGTAATGCCAGAGGAATCATTACCGCAGGGCATAGAGGGGGAGGTCATAAGCGTCTATACCGTAAAATCGATTTTCGACGGAAGGAAAAAGAAAAAGACATATATGGTAGAATCGTAACCATAGAATACGACCCTAATCGAAATGCATACATTTGTCTCATACACTATGGGGATGGTGAGAAGAGATATATTTTACATCCCAGAGGGGCTATAATTGGAGATACCATTGTTTCTGGTACAGAAGTTCCTATAAAAATGGGAAATGCCCTACCTTTGACC…
Corynonema pungens	OL591216	0.56	0.4853	50.6917	rps19	GTGACACGTTCACTCAAAAAAAATCCTTTTGTGGCGAATCATTTATTAAGAAAAATCGATAAGCTTAATACAAAAGCGGAAAAAGAAATAATAATAACTTGGTCCCGGGCATCTACCATTATACCCACAATGGTCGGACATACTATTGCTATCCATAATGGAAGGGAGCATTTGCCTATTTATATAACAGATCGTATGGTAGGACATAAATTGGGAGAATTTGCGCCCACTATCAATTTCCGTGGACATGCAAAAAATGATAATAGATCCCGTCGTTAA
Corynonema pungens	OL591216	0.6471	0.4242	50.4225	rpl22	ATGATAAGGATAATAAAGAAGAAGGTCGAAGTATCTGCTTTAGGTAAACATATATGTATGTCTGCTCACAAAGCCCGAAGGGTAATTGATCAGATTCGTGGACGTTCTTACGAGGGGAGCACTTATGATACTCGAACTCATGCCTTATAG
Crowea saligna	OL591172	0.4474	0.5185	53.7248	rps12	ATGCCAACTATTAAACAACTTATTAGAAACCCAAGACAGCCAATCAGAAACGTTACAAAATCCCCCGCTCTTGTGGGATGCCCTCAGCGCCGAGGAACATGTACAAGGGTGTATACTATCACCCCCAAAAAACCAAACTCTGCCTTACGTAAAGTTGCCAGAGTACGATTAACCTCTGGGTTTGAAATCACTGCTTATATACCTGGTATTGGCCATAATTCACAAGAACATTCTGTAGTCTTAGTAAGAGGGGGGAGGGTTAAGGATTTACCCGGTGTGAGATATCACATTGTTCGAGGAACCCTAGATGCTGTCGGAGTAAAGGATCGTCAACAAGGGCGTTCTAGTGCGTTGTAG
Crowea saligna	OL591172	0.3667	0.3162	33.5034	psbA	ATGACTGCTATTTTAGAGAGACGCGAAAGCGAACGCCTATGGGGTCGCTTCTGTAACTGGATAACCAGCACCGAAAACCGCCTTTACATTGGATGGTTTGGTGTTTTGATGATCCCTACTTTATTGACCGCAACTTCTGTATTTATTATCGCCTTCATTGCTGCCCCTCCAGTCGATATTGATGGTATTCGTGAACCTGTTTCTGGATCTTTACTTTATGGAAACAATATTATTTCTGGTGCGATTATTCCTACTTCTGCAGCTATAGGTTTGCACTTTTACCCGATATGGGAAGCGGCATCTGTTGATGAATGGTTATACAATGGTGGTCCTTATGAGCTAATTGTTCTACACTTCTTACTTGGTGTAGCTTGTTACATGGGTCGTGAGTGGGAACTT…
Crowea saligna	OL591172	0.5731	0.3923	52.8685	matK	ATGAAGGAATTTCAAGTCTATTTAGAACTAGATACATCTCAACAACACGACTTGCTATACCCGCTTCTTTTTCGGGAGTATATTTATGCACTTGCTCATGATCATGGTTTAAATAGCTCGACGAGTTCATTGGAAAGTGGGGTTTATGACAATAAATCTAGTTCGCTGAGTGTGAAACGGTTAATTACGCGAATGTATCAACCGATTAATTTGAGTATTGCTACTAATGGGTTTAACCAAAATCCAATTTTTTGGCACAACAATAAGTTTGATTTTCAAATTATATCAGAGGGATTGGCTGTTGTGGCGGAAATTCCATTTTCCCTACGGTTGGTAGCTTTTTTAGAAGGGGAAGAAACTGAAAAATCTCAGAATTTTCAATCAATTCATTCAATATTT…
Crowea saligna	OL591172	0.4762	0.4412	58.1849	rps16	ATGGTAAAACTTCGTTTAAAACGATGTGGTAGAAAGCAACGTGCCGTTTATCGAATCGTTGCAATTGATGGTCGATCCCGAAGAGAAGGAAGAGATCTTCGGAAAGTGGGTTTTTATGATCCGATAAACAATAAAACCCATTTAAATGTTCCTGCTATTCTATATTTCCTTGACAAGGGCGCCCAACCTACAGGAACCGTTCATGATATTTCAAAGAAAGCGGGGGTTTTTACAGAACTTAGTCTTAATAAAATGAAATTCTATTAA
Crowea saligna	OL591172	0.4737	0.3111	37.6997	psbK	ATGTTTAATATCTTTCGTTTAATGTATATCTGTCTTAATTCTGCCCTTTATTCGAGTTCGAGTAGTTTTTTATTCGCCAAATTGCCCGAGGCCTACGCTTTTTTGAATCCAATTGTAGATGTTATGCCAGTAATACCTCTTCTATTTTTTCTCTTAGCCTTTGTTTGGCAAGCTGCTGTAAGTTTTCGATAA
Crowea saligna	OL591172	0.25	0.4286	61	psbI	ATGCTTACTCTCAAACTCTTTGTTTACACCGTAGTGATATTCTTTGTTTCTCTCTTCATCTTCGGATTCCTGTCTAATGATCCAGGGCGTAATCCCGGACGCGAAGAATAA
Crowea saligna	OL591172	0.4828	0.4959	47.492	atpA	ATGGCAACAATTAAAGCCGACGAAATTAGTAATATTATCCGTGAACGTATCGAGCAATATAATAGAGAAGTAAAGATTGTAAATATTGGTACCGTACTTCAAGTAGGCGACGGCATCGCCCGTATTTATGGTCTTGATGAAGTAATGGCAGGTGAATTAGTAGAATTTGAAGAGGGTACAATAGGCATTGCTCTTAATTTAGAATCAAATAATGTTGGTGTTGTTTTAATGGGTGACGGTTTAATGATACAAGAGGGAAGTTCTGTAAAAGCAACCGGAAAAATTGCTCAGATACCAGTAAGCGAGGCTTATTTAGGTCGTGTTATAAATGCCCTGGCTAAACCTATTGATGGTCGAGGTGAAATTTCAGCTTCTGAATCTCGATTAATTGAATCTCCC…
Crowea saligna	OL591172	0.5714	0.5164	60.5772	atpF	ATGAAAAATGTAACCGATTCTTTCGTTTCTTTGGTTCACTGGCCATTCGCCGGGAGTTTCGGGTTTAATACCGATATTTTAGCAACAAATCCAATAAATCTAAGTGTAGTGATTGGTGTATTGATCTTTTTTGGAAAGGGAGTGTTAAGTGATTTATTAGATAATCGCAAACTGAGGATCTTGAATAGTATTCGAAATTCAGAAGAACTGCAGGACGGGGCCGTTGAACGGCTGGAAAAAGCCCGGGCCCGGTTACGGAAAGTCGAAATAGAAGCAGATCAGTTTCGAGTGAACGGATATTCTGAGATAGAACGAGAAAAATTCAATTTGATTAATTCAACTTCTAAGACTTTGGACCAATTAGAAAATTACAAAAATGAAACCATTCGTTTTGAACAA…
Crowea saligna	OL591172	0.7917	0.3793	55.4575	atpH	ATGAATCCACTGATTTCTGCCGCTTCCGTTATTGCCGCTGGGTTGGCTGTTGGGCTTGCTTCTATTGGACCTGGAGTTGGTCAAGGTACTGCTGCGGGCCAAGCAGTAGAGGGGATTGCGAGACAACCCGAGGCGGAGGGAAAAATACGAGGTACTTTGTTGCTTAGTCTGGCTTTTATGGAAGCTTTAACAATTTATGGACTGGTTGTAGCATTAGCGCTTTTATTTGCGAATCCTTTTGTTTAA
Crowea saligna	OL591172	0.3919	0.4425	57.7031	atpI	ATGAATGTTCTATCATGTTCCATCAACACACTAAAGGGGTTATACGATATATCCGGTGTGGAAGTAGGCCAACATTTCTATTGGCAAATAGGCGGGTTCCAAGTCCATGCCCAAGTACTTATTACTTCTTGGGTTGTAATTGCTATCTTATTAGGTTCAGCCTTTATAGCCGTTCGGAATCCACAAACCGTTCCGACTGCCAGTCAAAATTTCTTCGAATATGTCCTTGAATTCATTCGAGACGTGAGCAAAACTCAGATTGGAGAAGAATATGGCCCATGGGTTCCTTTTATTGGAACTACGTTTCTTTTTATTTTTGTTTCGAATTGGTCAGGTGCTCTTTTACCTTGGAAAATCATAGAGTTACCTCATGGGGAGTTAGCCGCACCCACGAATGAT…
Crowea saligna	OL591172	0.5224	0.4471	53.8139	rps2	ATGGCAAGAAGATATTGGAACATCCATTTGGAAGAGATGATGGAAGCAGGAATTCATTTTGGTCATGGTACTCGGAAATGGAATCCTAGAATGGCACCTTATATATCTGCAAAACACAAAGGTATTCATATTACAAATCTTACTCGAACTGCTCGTTTTTTATCAGAAGCTTGTGATTTAGTTTTTGATGCAGCAAATAGGGGAAAACTATTCTTAATTGTTGGTACTAAAAATAAAGCTGCTGATTCAGTCGCCCGAGCTGCACTAAAGGCTCGGTGTCATTATGTTAATAAAAAATGGCTCGGTGGTATGTTAACGAATTGGTCCACTACCGAAACGAGACTTCACAAGTTCAGGGATTTGAGAACGGAACAAAAAAAGGGGAGACTTGACAGTCTT…
Crowea saligna	OL591172	0.5685	0.4678	51.7927	rpoC2	ATGGCAGAACGGGCGAGTCTGGTCTTTCACAATAAAATGATAGATGGAACTGCTATTAAACGACTTATTAGCAGGTTAATAGATCACTTCGGAATGGCATATACATCACACATCCTGGATCAAGTAAAGACCCTGGGTTTCCAGCAAGCCACTGCTACATCTATTTCATTAGGCATTGATGATCTTTTAACGATACCCTCGAAGCGATGGCTAGTCCAAGATGCTGAACAACAAAGTCTTATTTTGGAAAAACACCATCATTATGGGAATGTCCACGCGATAGAAAAACTACGTCAATCCATTGAGATATGGTATGCTACAAGTGAATATTTGCGACAAGAAATGAATCCTAATTTTAGGATGACTGATCCCTTTAATCCAGTCCATATAATGTCTTTT…
Crowea saligna	OL591172	0.5824	0.4698	48.5039	rpoC1	ATGATTGATCGATATAAACATCAACAACTCCGAATTGGATCAGTTTCTCCTCAAAAAATAAGCGCTTGGGCCAAAAAAATCCTACCTAATGGAGAGATAGTTGGAGAAGTGACAAAACCCTATACTTTTCATTACAAAACCAATAAACCCGAAAAAGATGGATTATTTTGTGAAAGAATTTTTGGGCCTATTAAAAGTGGAATTTGCGCTTGTGGAAATTATCGAATAATCGGAGATGAAAAAGAAGACCCCCAATTTTGTGAACAATGTGGAGTTGGATTTGTTGATTCTCGGATACGAAGATATCAAATGGGATACATAAAACTTGGATGCCCAGTAACCCACGTGTGGTATTTGAAACGTCTTCCTAGTTATATCGCGAATCTTTTAGATAAACCT…
Crowea saligna	OL591172	0.6067	0.4886	51.0306	rpoB	ATGCTCGGAGATGGAAATGGGGGAATGTCTACAATACCCGGGTTGAATCAGATACAATTTGAAGGCTTTTGTAGGTTCATTGATCAGGGCTTAACAGAAGAACTTTCTAAGTTTCCAAAAATTGCAGATACAGATCAAGAAATAGAATTTCAATTATTTGTGGAAACATATCAATTGGTAGAACCCTTGCTAAAAGAAAGAGATGCTGTATATGAATCATTCACGTATTCTTCTGAATTATATGTCTCCGCAGGATTAATTTTGAAAAGCCGAGGGGATATGCAGGAACAAACAATTTTTATTGGAAACATTCCTCTAATGAATTCTTTGGGAACTTCTATAGTAAATGGAATATACAGAATTGTCATCAATCAAATATTGCAAAGTCCCGGTATCTAT…
Crowea saligna	OL591172	0.5455	0.5263	29.2857	petN	ATGGATATAGTAAGTCTCGCTTGGGCTGCTTTAATGGTAGTCTTTACATTTTCCCTTTCGCTCGTAGTATGGGGAAGAAGTGGACTCTAG
Crowea saligna	OL591172	0.5	0.4074	45.1818	psbM	ATGGAAGTAAATATTCTCGCATTTATTGCTACTACACTGTTCGTTCTAGTTCCTACTGCCTTTTTGCTTATAATATATGTAAAAACGGTCAGTCAAAGTGATTAA
Crowea saligna	OL591172	0.4603	0.3684	51.3124	psbD	ATGACTATAGCCCTTGGTAAATTTACCAAAGATGAAAAAGATTTATTTGATATTATGGATGACTGGTTACGGAGGGACCGATTCGTTTTTGTAGGTTGGTCCGGTCTATTGCTCTTTCCTTGTGCCTATTTCGCTTTAGGGGGTTGGTTCACAGGCACAACCTTTGTAACTTCATGGTATACCCATGGATTGGCCAGTTCCTATTTGGAAGGCTGCAACTTCTTAACCGCCGCAGTTTCGACTCCTGCTAATAGTTTAGCGCATTCTTTGTTGTTACTATGGGGTCCTGAAGCACAAGGGGATTTTACTCGTTGGTGTCAATTAGGTGGTCTTTGGACTTTTGTTGCTCTTCACGGTGCTTTCGGACTAATAGGGTTCATGTTACGTCAATTTGAACTT…
Crowea saligna	OL591172	0.4899	0.3962	48.1931	psbC	GTGGAAACGCTCTTTAATGGAACTTTATCTGTAGCAGGTCGTGACCAAGAAACCACCGGTTTTGCTTGGTGGGCCGGGAATGCCCGACTTATCAATTTATCCGGTAAACTGCTAGGCGCTCATGTAGCCCATGCTGGATTAATCGTATTCTGGGCCGGAGCAATGAACCTATTTGAAGTGGCTCATTTCGTACCAGAAAAGCCCATGTATGAACAAGGATTAATTTTACTTCCCCACCTAGCTACTCTAGGCTGGGGGGTAGGTCCTGGCGGTGAAGTTATAGACACCTTTCCATACTTTGTATCTGGAGTACTTCACTTAATTTCCTCTGCTGTATTGGGGTTTGGCGGTATTTATCACGCCCTTCTGGGACCTGAGACTCTTGAAGAATCTTTTCCA…
Crowea saligna	OL591172	0.5	0.3556	52.0166	psbZ	ATGACTATTGCTTTCCAATTAGCTGTTTTTGCATTAATTGCTACTTCATCAATCTTACTGATTAGTGTACCCGTTGTATTTGCTTCTCCGGATGGTTGGTCGAGTAACAAAAATGTCGTATTTTCTGGTACATCAGTGTGGATTGGATTAGTCTTTCTGGTGGGTATCCTTAATTCTCTCATCTCTTAA
Crowea saligna	OL591172	0.7143	0.5606	55.0298	rps14	ATGGCAAGGAAAAGTTTGATTCATAGGGAGAAGAAAAGGAAAAAATTGGAACAAAAATATCATTTGATTCGTCGATCCTCAAAAAGAGAAATAAACAAAGTTCCGTCGTTGATCGATAAATGGAAAATTCATGGAAAGCTACAATCCTCACCGCGTAATAGTGCACCTACACGTTTTCATCGACGTTGTTTTTCGACCGGAAGGCCGAGAGCTAACTATCGAGACTTTGGACTATCCGGGCACAAACTTCGTGAAATGGTCCATGCATGTTTGTTGCCGGGGGCAACAAGATCAAGTTGGTAA
Crowea saligna	OL591172	0.5473	0.376	51.6521	psaB	ATGGCATTAAGATTTCCAAGGTTTAGCCAAGGCTTAGCTCAGGACCCCACTACTCGTCGTATTTGGTTTGGTATTGCTACCGCACATGACTTCGAGAGTCATGATGATATTACTGAGGAACGTCTTTATCAGAATATTTTTGCTTCTCACTTCGGGCAATTAGCAATAATTTTTCTGTGGACTTCCGGAAATCTATTTCATGTAGCTTGGCAAGGAAATTTTGAAGCATGGGTACAGGACCCTTTACATGTAAGACCTATTGCTCATGCTATTTGGGATCCTCATTTTGGTCAACCGGCCGTGGAAGCTTTTTCTCGGGGAGGTGCTCTTGGCCCGGTGAATATCGCTTATTCTGGTGTTTATCAGTGGTGGTATACAATCGGTTTACGCACTAATGAG…
Crowea saligna	OL591172	0.5153	0.4151	52.4606	psaA	ATGATTATTCGTTCGCCGGAACCAGAAGTCAAAATTTTGGTAGATAGGGATCCCATAAAAACTTCTTTCGAGGAATGGGCCAGACCGGGGCATTTCTCAAGAACCATAGCTAAGGGACCTGATACTACCACTTGGATCTGGAACCTACATGCTGATGCTCACGACTTCGATAGCCATACCAGTGATTTGGAAGAGATCTCTCGAAAAGTATTTAGTGCCCATTTCGGACAACTCTCCATCATTTTTCTTTGGCTGAGCGGCATGTATTTCCACGGTGCTCGTTTTTCCAATTATGAAGCTTGGCTAAGCGATCCTACTCACATTGGACCCAGTGCACAGGTGGTTTGGCCAATAGTGGGCCAAGAAATATTGAACGGTGATGTGGGCGGGGGTTTCCGA…
Crowea saligna	OL591172	0.5424	0.4595	50.6133	ycf3	ATGCCTAGATCGCGGATAAATGGAAATTTTATTGATAAGACCTTTTCAATTGTAGCCAATATATTATTACGAATAATTCCGACAACTTTAGGAGAAAAAGAGGCATTTAGCTATTACAGAGATGGTGCGATGTCAGCTCAATCTGAAGGCAATTATGCGGAAGCTTTACAGAATTATTATGAAGCTATGCGGCTCGAAATTGATCCCTACGATCGAAGCTATATACTCTATAACATAGGCCTTATCCACACAAGTAACGGAGAACATACAAAAGCTTTAGAATATTATTTTCGGGCACTCGAACGAAATCCATTCTTACCACAAGCTTTTAATAATATGGCTGTGATCTGTCATTACCGGGGAGAACAGGCCGTTCGGCAGGGAGATTCTGAAATTGCG…
Crowea saligna	OL591172	0.5439	0.4828	56.6826	rps4	ATGTCACGTTACCGAGGGCCTCGTTTCAAAAAAATACGCCGTCTGGGGGCTTTGCCGGGACTAACGGGTAAAGGGCCTAGGGCCGGAAGCGATTTTAGAAACCAATCGCGCTCCGGAAAAAAATCTCAATATAGAATTCGTTTAGAAGAAAAACAAAAATTGCGTTTTCATTATGGTCTTACAGAACGACAATTACTTAAATATGTTCGTATCGCCGGAAAAGCCAAAGGGTCGACTGGTCTGGTTTTACTACAATTACTTGAAATGCGTTTGGATAACATTCTTTTTCGGTTGGGTATGGCTTCAACTATTCCTCAAACCCGCCAATTAATTAACCATCGACATATTTTAGTTAATGGGCGTATAGTCGATATACCAAGTTATCGTTGCAAACCCCGA…
Crowea saligna	OL591172	0.6458	0.4144	52.2423	ndhJ	ATGCAAGGTCGTTTGTCTGCTTGGCTAGTTAAGCATGGGATAATTCATAGATCTTTGGGCTTCGATTACCAAGGAATAGAAACTTTACAAATAAAGCCCGAGGATTGGCATTCCGTTGCTGTCATTTTGTATGTATATGGTTACAATTATCTACGTTCCCAATGTGCCTATGATGTAGCACCGGGTGGACTGCTAGCCAGTGTGTATCATCTTACGCGAATAAAGTATGGTGTAGATCAACCCGAAGAGGTATGCATAAAAGTATTTGCTCCAAGGAGTAATCCTAAAATTCCATCTGTTTTTAGGGTTTGGAAAAGTGCGAATTTTCAAGAACGGGAATCTTATGATATGCTGGGAATCTTTTATGATAATCATCCACGACTGAAACGTATCTTAATG…
Crowea saligna	OL591172	0.5147	0.4438	55.0581	ndhK	ATGAATTCCATTGAATTTTCTTTACTTGATCGAACAACCCCAAATTCATTTATTTCAACTACATCAAACGATCTTTCCAATTGGTCAAGACTCTCCAGTTTATGGCCGCTTCTTTATGGTACCAGTTGTTGTTTCATTGAATTTGCTTCGTTAATCGGCTCGCGGTTCGATTTTGACCGTTATGGACTGGTACCAAGATCGAGCCCTAGACAGGCGGACCTAATTTTAACAGCTGGTACCGTAACAATGAAAATGGCTCCTTCTTTAGTGAGATTATATGAACAAATGCCCGAACCAAAATACGTTATTGCTATGGGAGCATGTACAATTACAGGGGGGATGTTCAGTACCGATTCGTATAGTACTGTTCGGGGAGTTGATAAGCTAATTCCTGTGGAT…
Crowea saligna	OL591172	0.6111	0.4235	61	ndhC	ATGTTTCTGCTTTACAAATATGATATTTTCTGGGCATTTCTAATAATATCAAGCGTTATTCCTATTTTGGCATTTCGAATTTCCGCAGTTTTAGCCCCGATTAACAAAGGGCCAGAGAAACTTTCTGGTTATGAATCGGGTATAGAACCAATGGGCGACGCTTGGTTACAATTTAGAATCCGGTATTATATGTTTGCTCTAGTTTTTGTTGTTTTTGATGTTGAAACCGTTTTTCTTTATCCATGGGCAATGAGTTTTGATATATTGGGGGTATCCGTATTTATAGAAGCTTTCATTTTCATGCTTATCCTAATTGTTGGTTCAGTTTATGCGTGGCGAAAAGGAGCATTAGAGTGGTCTTAG
Crowea saligna	OL591172	0.5556	0.5	61	atpE	ATGACCTTAAATCTTTGTGTACTGACCCCCAATCGAATTGTTTGGGATTCAGAAGTGAAAGAAATCGTTTTATCGACCAATAGTGGACAAATAGGCGTATTACCAAATCACGCGCCTATTGCCACAGCTGTAGATATAGGTATTTTAAGAATCCGCTTTAACGACCAATGGGTAACGATGGCTCTGATGGGTGGTTTTGCTAGAATAGGGAACAATGAGATCACTATTTTAGTAAATGATGCGGAGAAGAGTAGTGACATTAATCCCCAAGAAGCCCAGCAAACTCTTGAAATAGCGGAAGCTAATTTGAGGAAAGCTGAAAGCAAGAGACAAATAATTGAGGCAAATCTAGCTCTCAGACGAGCTAGGACACGAGTAGAGGTTATCAATGCGATTTGA
Crowea saligna	OL591172	0.5127	0.4839	51.0275	atpB	ATGAGAATAAATCCTACTACTTCCGGCCCTGGGGTTTCCGCGCTTGCAAAAAAAAACCTGGGACATATCGCTCAAATCATTGGTCCGGTACTGGATGTAGCCTTTCCCCCTGGGAAGATGCCTAATATTTACAATGCTCTAGTAGTTAAGAGTCGAGATACTGCCGGTCAACCAATTAATGTGACTTGCGAGGTACAGCAATTATTAGGGAATAATCGGGTTAGAGCTGTAGCCATGAGTGCTACAGATGGTCTAACAAGAGGGATGGAAGTAATTGACACGGGAGCTCCTCTAAGTGTTCCAGTCGGCGGAGCGACTCTAGGACGAATTTTCAACGTGCTTGGAGAGCCTGTTGATAATTTAGGTCCTGTAGATACTCGCACAACATCCCCTATTCAT…
Crowea saligna	OL591172	0.4654	0.4322	53.1644	rbcL	ATGTCACCACAAACAGAGACTAAAGCGAGTGTTGGATTCAAAGCCGGCGTTAAAGATTATAAATTGACTTATTATACTCCTGACTATGTAACCAAAGATACTGATATCTTGGCAGCATTCCGAGTAAGTCCTCAACCCGGAGTTCCGCCTGAGGAAGCGGGGGCTGCAGTAGCTGCGGAATCTTCTACCGGTACATGGACAACCGTGTGGACCGATGGGCTTACCAGCCTTGATCGTTACAAAGGGCGATGCTACAACATTGAGCCCGTTGCTGGAGAAGAAAATCAATATATATGTTATGTAGCTTACCCGTTAGACCTTTTTGAAGAAGGTTCTGTTACTAACATGTTTACTTCCATTGTGGGTAATGTATTTGGTTTCAAAGCCCTGCGCGCTCTA…
Crowea saligna	OL591172	0.5473	0.3371	47.222	accD	ATGAAAAAAAGGTGGTTCAATTTGATGTTATCTAAGGGTAAGGGTAAAGGGGAATTAGAACACAGGTGTGGGTTAAGTAAATCAATGGATAGTCTTGGTCCTATTAAAAATACCAGTGTAAGCGGGGATCCGATTCGAAATGATAAGGATAAAAACATTCATAGTTCGAGTGATAGTGACTGTTCGAGTTACAGTAATTTAGCTGGTGTCAGGGACATTCGTAATTTCATTTCGGATGACACCTTTTTTGTTAAGGATAGTAATAGGGACAGCTATTCCATATATTTTGATATTGAAAATCAAATTTTGGAAATAGACAATGATCATTCTTTTCTGAGTGAACTAGAAAGTTCTTTTTATAACTTTCGTAATTTTAGTTCTAGGAATACTGGATCCAAA…
Crowea saligna	OL591172	0.5385	0.44	56.7763	psaI	ATGACAATTTTCAACAGCTTTCCCTCCATTTTAGTGCCTTTAGTGGGCCTAGTATTTCCGGCAATGGCAATGGCTTCTTTATTTCTTTATCTTGAAAAAAATAAGATTTTTTAA
Crowea saligna	OL591172	0.5484	0.4309	53.0965	ycf4	ATGAGTTGGCGATCAGAATATATATGGATAGAATTTATAGCAGGCTCTCGCAAAACAAGCAATTTCTGCTGGGCCCTTATCCTTTTTTTAGGTTCATTAGGATTCTTAGTGGTTGGAATTTCTAGTTATCTTGATAGGAATTTGCTATCTTTATTTCCGTCTCAGCAAATAAAATTTTTTCCACAAGGGATCGTGATGTCTTTCTACGGGATCGCGGGTCTCTTTATTAGTTCCTATTTGTGGTGCACAATTACATGGAATGTAGGTAGCGGTTATGATCGATTTGATACAAAAGAGGGAATAGTGTGTATTTTTCGTTGGGGATTTCCTGGAAAAAATCGCCGCATCTTTCTACGATTCCTTATGAAAGATATTCAGTCCATTAGAATAGAAGTTAAA…
Crowea saligna	OL591172	0.4935	0.4177	61	cemA	ATGACAAAAAAAAAAACGAACGCATCCATTCCCCTTAGATATCTTTCATCTATAGTATTTGTAGTATTTTTGCCCTGGTGGATCCCTCTCTCATTTACTAAAAATCTGGAATCCTGGGTTACTAATTGGTGGAATACTAGTCAACCCGAAACCTTTTTGAATGATATTCAAGAAAAGGCGATTCTAGAAAAATTCATAGAATTCGAGGAATTATTCTTCTTGGACGAAATGATAAAGGAATTTACGGAAAGACGTCTAGAAAAGCTTCGTATAGGGCTCCCGAAAGAAACAATTCAATTAATCAAGATGCACGATGAGGATCATATCCATACGATTTTTCACTTCTCGACAAATACAATCTGCTTCGTTATTCTAAGTAGTTATTCGATTCTGTGTAAT…
Crowea saligna	OL591172	0.5702	0.4444	61	petA	ATGCAAATTCGAAATACCTTTTCTTCGTTAAAGGGAGAGATTACTCGATTCATTTCCGTATCCCTCATGATATATATAATAACTCAGGCATCAATTTCAAATGCATATCCCGTTTTTGCGCAGCAGGGTTTTGAAAATCCACGAGAGGCAACTGGTCGCATTGTATGCGCCAATTGTCATTTAGCTAATAAGCCCGTGGATATTGAGGTTCCACAGGCGATACTCCCCGATACTGTATTTGAAGCGGTTGTTCGAATTCCGTATGATATGCAACTGAAACAAGTTCTTGCTAATGGTAAAAGGGGGCCTTTGAATGTGGGGGCCGTTCTTATTTTACCAGAGGGGTTTGAATTAGCCCCCTCCGACCGTATTTCGCCCGAGATGAAAGAAAAGATAGGC…
Crowea saligna	OL591172	0.5	0.3333	22.9529	psbJ	ATGGCCGATACTACTGGAAGGATTCCCCTTTGGATAATAGGTACTGTAACTGGTATTCCTGTGATCGGTTTAATAGGCATTTTCTTTTATGGTTCATATTCCGGATTAGGTTCGTCCTTGTAG
Crowea saligna	OL591172	0.3125	0.4783	61	psbL	ATGACACAATCAAACCCGAACGAACAAAATGTTGAATTGAACCGTACCAGTCTCTACTGGGGGTTATTACTCATTTTTGTACTTGCTGTTTTATTTTCCAATTACTTCTTCAATTAA
Crowea saligna	OL591172	0.6	0.6	53.8	psbF	ATGACCATAGATCGAACCTATCCAATTTTTACAGTGCGATGGTTGGCTGTGCACGGACTAGCTGTACCTACCGTTTTTTTTTTGGGGTCAATATCAGCAATGCAGTTCATCCAACGATAA
Crowea saligna	OL591172	0.3793	0.4	53.1707	psbE	ATGTCTGGAAGCACAGGAGAACGTTCTTTTGCTGATATTATTACCAGTATTCGATACTGGGTCATTCATAGCATTACTATACCTTCCCTATTCATTGCGGGTTGGTTATTCGTCAGCACGGGGTTAGCTTACGATGTGTTTGGAAGCCCTCGTCCAAACGAGTATTTTACAGAGAGCCGACAAGGAATTCCATTAATAACCGGCCGTTTTGATTCTTTGGAACAACTCAACGAATTTAGTAGATCTTTTTAG
Crowea saligna	OL591172	0.6667	0.3462	33.5	petL	ATGCCTACTATAACTAGTTATTTTGGTTTTCTCCTAGCAGCTTTAACTATAACCTCGGCTCTATTTATTGGTCTGAGTAAGATAGGACTTGTTTAA
Crowea saligna	OL591172	0.3636	0.4815	61	petG	ATGATTGAAGTCTTTCTATTTGGAATCGTCTTAGGTCTAATTCCTATTACTTTGGCTGGATTATTCGTAACCGCATATTTACAATACAGACGTGGTGATCAGTTGGACCTTTGA
Crowea saligna	OL591172	0.6667	0.5667	61	psaJ	ATGCGAGATCTAAAAACATATCTTTCCGTGGCACCGGTACTAAGTACTCTATGGTTCGGGTCTTTAGCAGGGTTATTGATAGAAATTAATCGTTTATTCCCGGACGCATTGACATTTCCTTTTTTTTCATTCTAG
Crowea saligna	OL591172	0.6316	0.4167	54.9407	rpl33	ATGGCCAAGGGTAAAGATGTCCGAATAAGGGTTATTTTGGAATGTACTAGTTGTGTTCGAAACGGTGTTAATAAGGAATTAAGGGGTATTTCCAGATATATTACTCAAAAGAATCGACACAATACACCTAGTCGATTGGAATTGAGAAAATTTTGTCTCTATTGTTACAAACATACACTTCATGGGGAGATAAAAAAATAG
Crowea saligna	OL591172	0.64	0.5065	60.564	rps18	ATGGATAAAACCAAGCGACTCTTTCTTAAAACCAAGCGATCTTTTCGTAGGCGTTTGCCCCCGATACAATCGGGGGATCGAATTGATTATAGAAACATGACTTTAATTAATCGATTTCTTAGTGAACAAGGAAAAATATTATCTAGACGGGTGAATAGATTGACCTTAAAAGAACAACGATTAATTACTATTGCTATAAAACAAGCTCGTATTTTATCTTCGTTACCTTTTCTTAATAATGACAAACAATTTGAAAGAGGTGGGTCGATCACTAGAACTCCAGGTCTTCGAACCAGAAAAAAATAG
Crowea saligna	OL591172	0.7297	0.4862	48.4535	rpl20	ATGACTAGAATTAGACGAGGATATATAGCTCGGAGACGTAGAACGAAAATGCGTTTATTTGCATCAAGCTTTCGCGGAGCTCATTCAAGACTTAGTCGAACAAGTACTCAACAGAAAATAAGAGCTTTGGTTTCGGCTCATCGTGATAGAGATAGACAAAAAAGGGATTTTCGTCGTTTGTGGATCACTCGAATAAATGCAGTAATTCGCGTAAATATGGTATCCTTTATTTATAGTAGATTAATACACAATCTGTATAAGGCGCGGTTGGTTCTTAATCGTAAGATACTTGCACAAATAGCTATATCAAATAGGAATTGTCTTTATATGATTTCCAATGAGATCCTAAAAAAAGGAAATTGGAAGGAGTCCATTATAATTTTTAAACGGAGTTCTCTG…
Crowea saligna	OL591172	0.3793	0.4754	59.2451	rps12	CTACAACGCACTAGAACGCCCTTGTTGACGATCCTTTACTCCGACAGCATCTAGGGTTCCTCGAACAATGTGATATCTCACACCGGGTAAATCCTTAACCCTCCCCCCTCTTACTAAGACTACAGAATGTTCTTGTGAATTATGGCCAATACCAGGTATATAAGCAGTGATTTCAAACCCAGAGGTTAATCGTACTCTGGCAACTTTACGTAAGGCAGAGTTTGGTTTTTTGGGGGTGATAGTATGCCAACTATTAAACAACTTATTAGAAACCCAAGACAGCCAATCAGAAACGTTACAAAATCCCCCGCTCTTGTGGGATGCCCTCAGCGCCGAGGAACATGTACAAGGGTGTAT
Crowea saligna	OL591172	0.5294	0.4922	61	clpP1	ATGCCTATTGGTGTTCCAAAAGTACCTTATAGAAGTCCCGGGGACAAACATCCATCTTGGGTTGACATCAACCGACTTTATCGAGAAAGATTACTTTTTTTAGGTCAAATGGTTGAGAGTGATATCTCGAATCAACTTATTGGTATTATGGTATATCTCAGTATAGAGAACGAGACCAAGGATTTGTATTTATTTATCAATTCTCCTGGCGGATGGGTAATACCCGGAATAGCAATTTATGATACTATGCAATTTGTGCGACCAGATGTACAGACAATATGCATGGGATTGGCCGCCTCCATGGGGTCTTTTCTCCTGGCCGCAGGAGCAAGTACCAAACGTCTAGCATTCCCTCACGCTAGGGTCATGATCCATCAACCTATTGGCGCTTTTTATGGG…
Crowea saligna	OL591172	0.528	0.4167	52.774	psbB	ATGGGTTTGCCTTGGTATCGTGTTCATACCGTCGTATTGAATGATCCCGGTCGTTTGATTGCTGTCCATATAATGCATACAGCCCTGGTTGCGGGTTGGGCCGGTTCAATGGCTCTATATGAATTAGCTGTTTTTGATCCCTCCGATCCAGTTCTTGATCCAATGTGGAGACAAGGCATGTTCGTTATACCCTTCATGACTCGTTTAGGAATAACCGATTCATGGGGCGGTTGGAGTATTACGGGGGGGACGGTAACGAATCCGGGTATTTGGAGTTACGAAGGTGTAGCCGGGGCACATATTGTGTTTTCGGGCTTGTGTTTCTTGGCAGCTATCTGGCATTGGGTATATTGGGATCTAGCAATATTTGTTGATGACCGTACGGGAAAACGCTCTTTG…
Crowea saligna	OL591172	0.4167	0.5455	44.75	psbT	ATGGAAGCATTGGTTTATACATTCCTCTTAGTCTCGACCCTAGGGATCATTTTTTTCGCTATCTTTTTTCGAGAACCGCCTAAAGTTCCAACTAAAAAATGA
Crowea saligna	OL591172	0.4118	0.5556	61	psbN	ATGGAAACAGCAACCCTAGTCGCCATCTCTATATCTGGGTTACTTGTAAGTTTTACTGGGTACGCCTTATATACTGCTTTTGGGCAACCCTCTCAACAACTAAGAGATCCATTCGAGGAACACGGGGACTAG
Crowea saligna	OL591172	0.8333	0.4	61	psbH	ATGGCTGCACAAACAGTTGAGGGTAGTTCTAGAGCTCGTCCAAAAATGACTTCTGCAGGGGGGTTATTGAAACCTTTGAATTCGGAATATGGTAAAGTAGCCCCTGGATGGGGAACTGCTCCTTTGATGGGTATCGCAATGGCTCTATTTGCGATATTCCTGTCTATTATTTTGGAGATTTATAATTCGTCCGTTTTACTGGATGGAATTTCAATGAATTAG
Crowea saligna	OL591172	0.6094	0.4211	52.5403	petB	ATGAGTAAAGTATATGATTGGTTCGAAGAACGTCTCGAGATTCAGGCGATTGCAGATGATATAACTAGTAAATACGTTCCGCCTCATGTCAACATATTTTATTGTCTAGGAGGAATTACGCTTACTTGTTTTTTAGTACAAGTAGCTACAGGGTTTGCTATGACTTTTTACTACCGTCCGACCGTTACTGAGGCTTTTGCTTCTGTTCAATACATAATGACGGAAGCTAACTTTGGTTGGTTAATTCGATCAGTTCATCGATGGTCGGCAAGTATGATGGTCCTAATGATAATCCTGCACGTATTTCGTGTGTATCTCACTGGTGGTTTTAAAAAACCTCGCGAATTGACTTGGATTACAGGCGTGGTTCTGGCTGTATTGACCGCATCTTTTGGTGTA…
Crowea saligna	OL591172	0.5952	0.4874	44.8093	petD	ATGGGAGTAACAAAAAAACCTGACTTGAACGATCCTGTATTAAGGGCTAAGTTGGCTAAAGGTATGGGTCATAATTATTATGGAGAACCCGCATGGCCCAATGATCTTTTATATATTTTTCCAGTAGTAATTCTAGGTACTATTGCATGTAACGTGGGCTTAGCGGTTCTAGAACCATCAATGATTGGTGAACCCGCGGATCCGTTTGCAACTCCTTTGGAAATATTACCTGAATGGTATTTCTTTCCTGTATTTCAAATACTTCGTACAGTACCCAATAAGCTGTTGGGTGTTCTTTTAATGGTTTCAGTACCTGCGGGATTATTAACAGTACCCTTTTTGGAAAATGTTAATAAATTCCAAAATCCATTTCGCCGTCCAGTAGCGACAACCGTCTTT…
Crowea saligna	OL591172	0.5408	0.4825	55.4942	rpoA	ATGGTTCGAGAGAAAGTCAAAGTATCTGCTGGGACACTACAGTGGAAGTGTGTTGAATCAAGAGCAGACAGTAAGCGCCTTTATTATGGACGCTTTATTTTGTCTCCACTTATGAAAGGTCAAGCCGACACAATAGGCATTGCGATGCGAAGAGTTTTGCTTGGAGAAATAGAAGGGACGTGTATTACACGCGCAAAATCTGAGAAAACCCCACATGAATATTCTACCATAGTGGGTATTCAAGAATCGGTACATGAAATTTTAATGAATTTGAAAGAAATTGTATTGAGAAGTCATTTTTATGGAATTTGTGACGCGCTTATTTGTGTCAAAGGTCCAGGATATGTAACTGCTCAAGACATCCTCTTGCCACCTTCTGTGGAAATCGTTGATAAGACG…
Crowea saligna	OL591172	0.5405	0.5	61	rps11	ATGGCAAAATCTACAACAAGAAGTGGTTCACGTAGGACTGGACGGATTGGTTCGCGTAAAAGTGGACGTCGAATACCAAAGGGCGTTATTCATGTTCAAGCAAGTTTCAACAACACCATTGTGACTGTTACAGATGTACGGGGTCGAGTAATTTCTTGGTCCTCGGCCGGTACTTGTGGATTCAGGGGTACAAGAAGAGGTACGCCCTTTGCTGCTCAAACCGCAGCAGGAAGTGCTATTAGAGCAGTAGCAGATCAAGGTATGCAACGAGCAGAAGTCATGATAAAGGGTCCTGGTCTCGGAAGAGATGCAGCATTACGAGCTATTCGGAGAAGCGGTATCCTTTTAAATTTTGTACGGGATGTAACCCCTATGCCACATAATGGTTGCAGACCCCCT…
Crowea saligna	OL591172	0.6154	0.64	22.75	rpl36	ATGAAAATAAGGGCTTCCGTTCGGAAAATTTGTGAAAAATGTCGACTGATCCGCAGGAGGGGACGGATTATAGTAATTTGTTCCAACCCGAGACATAAACAAAGACAAGGATAA
Crowea saligna	OL591172	0.5	0.5385	45.0838	rps8	ATGGGCAAGGACACTATTGCTGACATAATAACTTGTATACGAAATGCTGACATGAATCGAAAAGGAACGGTTCGAATAGCATCTACTAACATCACCGAAAACTTTGTTAAAATACTTTTGCGAGAGGGTTTTATAGAAAACGTCAGGAAACTCGTGGAAAACAAAAAGGAGTTTTTGGGTTTAACCCTACGACATAGAAGGAATAGGAAAGGACCGTATAGACCCGTTTTAAATTTAAAACGAATCAGTCGACCCGGTCTACGAATCTATTTTAACTATGAACGAATTCCTAGAATTTTAGATGGGATGGGGATTGTAATTCTCTCTACTTCTCGGGGTATAATGACAGACCGAGCGGCTCGACTAGAAAGAATCGGCGGAGAAATTTTGTGTTATATA…
Crowea saligna	OL591172	0.4839	0.4891	53.2093	rpl14	ATGATTCAACCTCAAACCCATTTGAATGTAGCGGACAATAGCGGTGCCCGAGAATTGATGTGTATTCGAATCATAGGAGCCAGTAATCGTAGATATGCTCATATTGGTGACGTTATTGTTGCTGTGATCAAGGAAGCAGTACCAAATACACCTCTAGAAAGATCCGAAGTGATCAGGGCTGTAATTGTACGTACTTGTAAAGAACTCAGACGAGATAACGGTATGATAATACGTTATGATGACAATGCTGCAGTTGTCATTGATCAAGAAGGAAATCCAAAAGGAACTCGAGTTTTTGGTGCGATCGTCCGAGAATTGAGACAGTTGAATTTTACTAAAATAGTTTCATTAGCGCCTGAAGTATTATAA
Crowea saligna	OL591172	0.4872	0.5714	46.6513	rpl16	ATGCTTAGTAACCCCAAAAGAACAAGATTCCGTAAACAACATAGAGGAAGAATGAAAGGAATATCTTATCGAGGTAATCATATTAGTTTCGGCAGATATGCTCTTCAAGCACTTGAACCCGCTTGGATCACATCTAGACAAATAGAAGCAGGGCGTCGAGCAATGACACGAAATGTACGGCGTGGTGGAAAAATATGGGTACGTATATTTCCAGACAAACCTGTTACAGTAAGACCCACGGAAACCCGTATGGGGTCCGGGAAAGGATCCCCCGAATATTGGGTAGCCGTCGTTAAACCGGGTAGAATCCTTTATGAAATGAGTGAAGTCGCTGAAAATATCGCTCGAAGGGCTATTTCAATAGCGGCGTCCAAAATGCCTATAAGAACTCAATTCATT…
Crowea saligna	OL591172	0.3864	0.5966	45.0299	rps3	ATGGGACAAAAAATAAATCCACTTGGTTTCCGACTTGGTACAACACAAAGTCATCATTCACTTTGGTTTGCAAAACCAAAAAATTATTGCGAAGGCCTACAAGAAGATCAAAAAATACGAAACATTCTTAAGAATTATGTACAAAAAAGTATGATAATATCCTCCCGTCTTGACGGAATTGTCCGGATAGAGATTCAAAAAAGAATTGATCTAATTCAAGTCATAATATATATAGGATTCCAAAAATTTTTACTAGAAAATAGACCGCGAAGAGTTGAAGAATTACAGATGAATGTACAAAAAGAACTTAATTGTGTGAACCGAAAAATAAACATTGCTATTACAAGAATTGCAAATCCTTATGGACACCCCAATATTCTTGCCGAATTTATAGCCGGC…
Crowea saligna	OL591172	0.6	0.5	61	rpl22	ATGATAAGGATAGTAAAGAAGAAGGTCGAAGTATCTGCTTTAGGTAAACATATATGTATGTCTGCTCACAAAGCCCGAAGGGTAATTGATCAGATTCGTGGACGTTCTTACGAGGAAGCCCTTATGATACTCGAACTCATGCCTTATAGAGCATGTTATCCCATTAAAAAATAG
Crowea saligna	OL591172	0.5417	0.4928	53.092	rps19	GTGACACGTTCACTAAAAAAAAATCCTTTTGTAGCGAATCATTTATTAAGAAAAATCGATAAGCTTAATACAAAAGCGGAAAAAGAAATAATAATAACTTGGTCCCGGGCATCTACCATTATACCCACAATGGTCGGCCATACTATTGCTATCCATAATGGAAGGGAGCATTTGCCTATTTATATAACAGATCGTATGGTAGGACATAAATTGGGAGAATTTGCGCCCACTATCAATTTCCGTGGACATGCAAAAAATGATAATAGATCCCGTCATTAA
Crowea saligna	OL591172	0.4891	0.5135	56.2146	rpl2	ATGGCGGTACATTTATACAAAACTTCTACCCCGAGCACACGCAATGGAGCCGTAGACAGTCAAGTGAAATCCAATCCACGAAATAATTTGATCTATGGACAGCATCGTTGTGGTAAAGGTCGTAATGCCAGAGGAATCATTACCGCAGGGCATAGAGGGGGAGGTCATAAGCGTCTATACCGTAAAATCGATTTTCGACGGAAGGAAAAAGAAAAAGACATATATGGTAGAATCGTAACCATAGAATACGACCCTAATCGAAATGCATACATTTCTCTCATACACTATGGGGATGGTGAGAAGAGATATATTTTACATCCCAGAGGGGCTATAATTGGAGATACCATTGTTTCTGGTACAGAAGTTCCTATAAAAATGGGAAATGCCCTACCTTTGACC…
Crowea saligna	OL591172	0.5926	0.5075	61	rpl23	ATGGATGGAATCAAATATGCAGTATTTACAGACAAAAGTATTCGGTTATTGGGGAAAAATCAATATACTTCTAATGTCGAATCAGGATCAACTAGGACAGAAATAAAGCATTGGGCCGAACTCTTCTTTGGTGTCAAGGTAATAGCTATGAATAGTCATCAACTCCCCCGAAAGGGTAGAAGAATGGGACCTATTATGGCACATACAATGCATTACAGACGTATGATCATTACACTTCAACCGGGTTATTCTATTCCACCTCTTAGAAAGAAAAGAACTTAA
Crowea saligna	OL591172	0.5353	0.4375	53.4076	ycf2	ATGAAAGGACATCAATTCAAATCCTGGATTTTCGAATTGAGAGAGATATTGAGAGAGATCAAGAATTCTCACTATTTCTTAGATTCATGGACCCAATTCAATTCAGTGGGATCTTTCATTCACATTTTTTTGCACCAAGAACGTTTTCTAAAACTCTTGGACCCACGAATTTGGAGTATCCTACTTTCACGCAATTCACAGGGTTCAACAAGCAATCGATATTTCACGATCAAGGGTGTAGTACTTTTTGTAGTAGCGATCCTTATATATCGTATTAACAATCGAAATATGGTCGAAAGAAAAAATCTCTATTTGACAGGGCTTCTTCCTATACCTATGAATTCCATTGGACCCAGAACTGATACATTGGAAGAATCTTTTGGGTCTTCCAATATCAAT…
Crowea saligna	OL591172	0.5714	0.6875	46.5263	ycf15	ATGCTACTGCTGAAACATAGAAGAATTGAAATCTTAGATCAAAACACTATGTATGGATGGTATGAACTGCTTAAACAAGAATTCTTGAACAGCGAACCACCAGAGCTATTACTAACTACATCAAAAAATTTCCATTAA
Crowea saligna	OL591172	0.4294	0.4598	50.8799	ndhB	ATGATCTGGCATGTACAGAATGAAAACTTCATTCTCGATTCTACGAGAATTTTTATGAAAGCCTTTCATTTGCTTCTCTTCGATGGAAGTTTGATTTTCCCAGAATGTATCCTAATTTTTGGCCTAATTCTTCTTCTGATGATCGATTCAACCTCTGATCAAAAAGATATACCTTGGTTATATTTCATCTCTTCAACAAGTTTAGTAATGAGCATAGCGGCCCTATTGTTCCGATGGAGAGAAGAACCTATGATTAGCTTTTCGGGAAATTTCCAAACGAACAATTTCAACGAAATCTTTCAATTTCTTATTTTACTATGTTCAACTCTATGTATTCCTCTATCCGTGGAATACATTGAATGTACAGAAATGGCTATAACAGAGTTTCTGTTATTCGTA…
Crowea saligna	OL591172	0.5128	0.5812	47.2168	rps7	ATGTCACGTCGAGGTACTACAGAAGAAAAAGCTGCAAAATCCGATCCAATTTATCGGAATCGCTTAGTTAACATGTTGGTTAACCGTATTCTGAAACACGGAAAAAAATCATTGGCTTATCAAATTATCTATCGAGCCTTGAAAAAGATTCAACAAAAGACAGAAAAAAATCCACTATCTGTTTTACGTCAAGCAATACGTGGAGTAACTCCCGATATAGCAGTAAAAGCAAGACGTGTAGGCGGATCGACTCATCAAGTTCCCATTGAAATAGGATCCGCACAAGGAAAAGCACTTGCCGTTCGTTGGTTATTAGGGGCATCCCGAAAACGTCCGGGTCGAAATATGGCTTTCAAATTAAGTTCCGAATTAGTGGATGCTGCCAAAGGGAGTGGCGAT…
Crowea saligna	OL591172	0.9333	0.5349	36.2727	rpl32	ATGGCAGTTCCAAAAAAACGTACTTCTATATTAAAAAAACGTATTCGTAAGAATATTTGGAAAAAAAGGGGAGATTGGGCAGCGTTGAAGGCTTTTTCGTTAGCGAAATCCCTTTCTACTGGGAATTCAAAAAGTTTTTTTGGAAAACAAATAGATAAGAAAACGTTGGAATAA
Crowea saligna	OL591172	0.5275	0.4714	55.432	ccsA	ATGATCTTTTCAACTTTAGAGCATATATTAACGCATATATCCTTTTCGGTCGTTTCAATTGGAATTCCAATATATTTACTAACCTTATTAGTCGATGAAATAAGAGCACTATATTATTCATCAGAAAAGGGGATGATAGCTACCGCTTTATGTCTAACAGGATTATTAATCACGCGTTGGATTTACTCGAGGCATTTCCCATTAAGTGATTTAGATGAATCATTAATCTTTCTTTCATGGAGTTTCTCCATTATTCATAGGATTTTCTATTTTAAAAATAAAAAAAATCATTTAAGCGCTATAACGGCACCAAGTGCTATTTTTACCCAAGGCTTTGCTACTTCGGGTTTTTTAACCAAAATGAATCAATCCGGAATATTAGTACCCGCTCTCCAAGTC…
Crowea saligna	OL591172	0.5	0.4772	51.4543	ndhD	ATTGTAGTTTTTCCGATAGCTGCGGGTTCTTTAATTTTCTTTCTCCCTCATAGAGGCAATAAGGTGACTAGAGGATATACAATATATATATGTGTCTTAGAACTCCTTCTAACGACCTATGCATTTTGTTATAATTTCCAATTGGACGATCCATTAATCCAGCTGGAAGAGGATTCTAAATGGATCACCTTTTTTGATTTTGACTGGCGGTTGGGAATAGATGGACTTTCCATAGGACCCATTTTACTGGCGGGATTTATCACTACTTTAGCTACTTTAGCGGCTCGGCCAGTTACTCGGAATTCCCGACTATTCCATTTCCTGATGTTAACGATGTACAGCGGTCAAATAGGACCATTTTCTTCTCGAGACCTTTTACTTTTTTTCATCATGTGGGAA…
Crowea saligna	OL591172	0.5455	0.4833	32.7383	psaC	ATGTCACATTCAGTAAAGATTTATGATACATGTATAGGGTGTACTCAATGTGTCCGAGCTTGCCCCACAGATGTATTAGAAATGATACCTTGGGACGGATGTAAAGCAAAGCAAATTGCTTCTGCTCCAAGAACAGAAGATTGTGTTGGTTGTAAGCGATGCGAATCCGCCTGCCCAACGGATTTCTTGAGTGTTCGGGTTTATTTATGGCATGAAACAACTAGAAGCATGGGTCTAGCTTATTGA
Crowea saligna	OL591172	0.5517	0.3699	61	ndhE	ATGATGCTCGAGCATGTACTTGTTTTGAGTGCCTATTTATTTTCTATTGGTATCTATGGATTGATTACGAGCCGAAATATGGTTCGGGCCCTGATGTGTCTTGAACTTATAGTAAATGCAGTTAATATCAATTTCGTAACATTCTCTGATTTTTTTGATAGTCGACAATTAAAAGGAGATATTTTCGCAATTTTTGTTATAGCTATTGCAGCCGCTGAAGCAGCTATCGGATCAGCTATTGTTTCGTCAATTTATCGTAACAGAAAATCGACTCGTATCAATCAATCGACTTTATTGAATAAGTAG
Crowea saligna	OL591172	0.5	0.3643	59.9239	ndhG	ATGGATTTGCCTGGACCAATACATGATTTTCTTTTTGTTTTTCTGGGCTCAGGTCTTATATTAGGAGGTCTGGGAGTGGTATTATTTACCAACTCCATTTATTCTGCCTTTTCCTTGGGATTGGTTCTTGTTTGTATATCCTTATTCTATATTCTATCAAATTCCCATTTTGTAGCTGCTGCGCAACTCCTTATTTACGTGGGAGCTGTAAATGTTTTAATCATATTTGCTGTAATGTTCATGAATGGTTCAGACTATTCCAAAGATTTTCATTTGAATTTTTGGACTGTTGGTGACGGACTTACTTCCCTGGTTTGTACAAGTATTTTTTTTTCGCTAATCGCTACTATTCTAGATACGTCGTGGTACGAGATTATTTGGACTACACGACCCAACCAG…
Crowea saligna	OL591172	0.6216	0.4198	54.8421	ndhI	ATGTTCCCTATGGTAATTGGTTTCATGAATTATGGTCAACAAACAATACGAGCTGCAAGGTACATTGGTCAAAGTTTCATGATTACTTTATCGCAAGCAAATCGTTTACCTGTAAGTATTCAATATCCTTATGAAAAATTAATCACATCGGAGCGTTTTCGCGGTCGAATACATTTTGAATTTGATAAATGTATTGCTTGTGAAGTATGTGTTCGCGTATGCCCTATAGATCTGCCTGTTGTAGATTGGAAATTTGAAACAAATATTCGAAAGAAACGATTGCTTAATTACAGTATTGATTTTGGAATTTGTATTTTTTGTGGTAACTGTGTTGAGTATTGTCCAACAAATTGTTTATCAATGACGGAAGAATATGAACTTGCTACTTATGACCGTCAC…
Crowea saligna	OL591172	0.5114	0.5	47.6209	ndhA	ATGATAATTGATACAACAGAAGTACAAGATATCAATTCTTTTTCCAGATTGGAATCCCTGCAAGAGGTCTATGGGATCATGTGGGTGCTTGCCCCTATTTCAACCCCGGTAGTGGCAATCACAACAGGTGTCCTAGTAATTGTGTGGTTAGAAAGAGAAATATCTGCAGGAATACAACAACGTATTGGGCCTGAATACGCCAGTCCCTTGGGAATTCTTCAAGCTTTAGCAGATGGGACAAAACTACTTTTCAAAGAAAACCTTCTTCCATCTAGAGGAAATAGTAGTTTATTCAGTATTGGACCATCTATAGCAGTCATAGCAATTCTACTAAGTTCTTCAGTAATTCCTTTTAGTTATAACCTTGTTTTAGCTGACCTTAATATCGGTATTTTTTTA…
Crowea saligna	OL591172	0.5648	0.486	50.8984	ndhH	ATGAGTATACTAGCTACAGAAAAAGAATTTATGATAGTCAATATGGGACCTCACCACCCATCAATGCACGGTGTTCTTCGTCTTATCGTTACTCTAGATGGTGAAGATGTTATTAACTGTGAACCAATATTGGGTTATTTACACCGAGGGATGGAAAAAATTGCGGAAAACCGAACAATTATACAATATCTGCCTTATGTAACCCGTTGGGATTATTTAGCTACTATGTTCACCGAAGCAATAACTGTAAATGGACCCGAACTCTTGGGAAATATTCAAGTACCCAAAAGAGCCAGCTATATCCGAGTAATTATGTTGGAGTTGAGTCGTATAGCTTCCCATCTGTTATGGCTTGGCCCTTTTATGGCAGATATTGGTGCACAGACTCCTTTCTTCTAT…
Crowea saligna	OL591172	0.6364	0.6087	47.1623	rps15	ATGGTAAAAAATTCATTCGTCTCAGTTATGTTTCAAGAAAAAAAAGAAGAAAACCGTGGATCCGTTGAATTTCAAGTATTACGTTTCACTAATAAGATACGGAGACTTACTTCACATTTAGAATTACACAGAAAAGACTATTTATCTCAAAGGGGTCTACGGAAAATTTTGGAAAAACGCCAACGTCTACTAGTGTATTTGTCAAAGAAAAATAGAGTACGTTATAAAGAATTAATTAGTAAGTTGAATATTCGGGAGTCAAAAAATCGTTAA
Crowea saligna	OL591172	0.5224	0.5186	49.7653	ycf1	ATGATTGTTCAATCTTTTATACTAGGGAATCGAGTATCCTTATGCATGAAGATAATCAATTCGGTCGTTGTGGTCGGACTCTATTATGGATTTATGACCACATTCTCCATAGGGCCCTCTTATCTCTTCCTTCTCCGAGCTCGGGTTGTGGAAGAAGGAGAAGAAGGAACCGAGAAGAAGGTATCAGCAACAACTGGTTTTATTGCGGGACAGCTCATGATGTTCATATCGATCTATTATGCGCCTCTGCATCTAGCATTGGGTAGGCCTCATACAATAACTGTCCTAGCTCTACCGTATCTTTTGTTTCATTTCTTCTGGAACAATCCCAAACACTTTTTGGATTATGGATCTACTACCAGACGTAATCTTAGCATTCAATGTGTATTCCTGAATAAT…
Crowea saligna	OL591172	0.5128	0.5812	47.2168	rps7	ATGTCACGTCGAGGTACTACAGAAGAAAAAGCTGCAAAATCCGATCCAATTTATCGGAATCGCTTAGTTAACATGTTGGTTAACCGTATTCTGAAACACGGAAAAAAATCATTGGCTTATCAAATTATCTATCGAGCCTTGAAAAAGATTCAACAAAAGACAGAAAAAAATCCACTATCTGTTTTACGTCAAGCAATACGTGGAGTAACTCCCGATATAGCAGTAAAAGCAAGACGTGTAGGCGGATCGACTCATCAAGTTCCCATTGAAATAGGATCCGCACAAGGAAAAGCACTTGCCGTTCGTTGGTTATTAGGGGCATCCCGAAAACGTCCGGGTCGAAATATGGCTTTCAAATTAAGTTCCGAATTAGTGGATGCTGCCAAAGGGAGTGGCGAT…
Crowea saligna	OL591172	0.4294	0.4598	50.8799	ndhB	ATGATCTGGCATGTACAGAATGAAAACTTCATTCTCGATTCTACGAGAATTTTTATGAAAGCCTTTCATTTGCTTCTCTTCGATGGAAGTTTGATTTTCCCAGAATGTATCCTAATTTTTGGCCTAATTCTTCTTCTGATGATCGATTCAACCTCTGATCAAAAAGATATACCTTGGTTATATTTCATCTCTTCAACAAGTTTAGTAATGAGCATAGCGGCCCTATTGTTCCGATGGAGAGAAGAACCTATGATTAGCTTTTCGGGAAATTTCCAAACGAACAATTTCAACGAAATCTTTCAATTTCTTATTTTACTATGTTCAACTCTATGTATTCCTCTATCCGTGGAATACATTGAATGTACAGAAATGGCTATAACAGAGTTTCTGTTATTCGTA…
Crowea saligna	OL591172	0.5714	0.6875	46.5263	ycf15	ATGCTACTGCTGAAACATAGAAGAATTGAAATCTTAGATCAAAACACTATGTATGGATGGTATGAACTGCTTAAACAAGAATTCTTGAACAGCGAACCACCAGAGCTATTACTAACTACATCAAAAAATTTCCATTAA
Crowea saligna	OL591172	0.5353	0.4375	53.4076	ycf2	ATGAAAGGACATCAATTCAAATCCTGGATTTTCGAATTGAGAGAGATATTGAGAGAGATCAAGAATTCTCACTATTTCTTAGATTCATGGACCCAATTCAATTCAGTGGGATCTTTCATTCACATTTTTTTGCACCAAGAACGTTTTCTAAAACTCTTGGACCCACGAATTTGGAGTATCCTACTTTCACGCAATTCACAGGGTTCAACAAGCAATCGATATTTCACGATCAAGGGTGTAGTACTTTTTGTAGTAGCGATCCTTATATATCGTATTAACAATCGAAATATGGTCGAAAGAAAAAATCTCTATTTGACAGGGCTTCTTCCTATACCTATGAATTCCATTGGACCCAGAACTGATACATTGGAAGAATCTTTTGGGTCTTCCAATATCAAT…
Crowea saligna	OL591172	0.5926	0.5075	61	rpl23	ATGGATGGAATCAAATATGCAGTATTTACAGACAAAAGTATTCGGTTATTGGGGAAAAATCAATATACTTCTAATGTCGAATCAGGATCAACTAGGACAGAAATAAAGCATTGGGCCGAACTCTTCTTTGGTGTCAAGGTAATAGCTATGAATAGTCATCAACTCCCCCGAAAGGGTAGAAGAATGGGACCTATTATGGCACATACAATGCATTACAGACGTATGATCATTACACTTCAACCGGGTTATTCTATTCCACCTCTTAGAAAGAAAAGAACTTAA
Crowea saligna	OL591172	0.4891	0.5135	56.2146	rpl2	ATGGCGGTACATTTATACAAAACTTCTACCCCGAGCACACGCAATGGAGCCGTAGACAGTCAAGTGAAATCCAATCCACGAAATAATTTGATCTATGGACAGCATCGTTGTGGTAAAGGTCGTAATGCCAGAGGAATCATTACCGCAGGGCATAGAGGGGGAGGTCATAAGCGTCTATACCGTAAAATCGATTTTCGACGGAAGGAAAAAGAAAAAGACATATATGGTAGAATCGTAACCATAGAATACGACCCTAATCGAAATGCATACATTTCTCTCATACACTATGGGGATGGTGAGAAGAGATATATTTTACATCCCAGAGGGGCTATAATTGGAGATACCATTGTTTCTGGTACAGAAGTTCCTATAAAAATGGGAAATGCCCTACCTTTGACC…
Crowea saligna	OL591172	0.5417	0.4928	53.092	rps19	GTGACACGTTCACTAAAAAAAAATCCTTTTGTAGCGAATCATTTATTAAGAAAAATCGATAAGCTTAATACAAAAGCGGAAAAAGAAATAATAATAACTTGGTCCCGGGCATCTACCATTATACCCACAATGGTCGGCCATACTATTGCTATCCATAATGGAAGGGAGCATTTGCCTATTTATATAACAGATCGTATGGTAGGACATAAATTGGGAGAATTTGCGCCCACTATCAATTTCCGTGGACATGCAAAAAATGATAATAGATCCCGTCATTAA
Crowea saligna	OL591172	0.6	0.5	61	rpl22	ATGATAAGGATAGTAAAGAAGAAGGTCGAAGTATCTGCTTTAGGTAAACATATATGTATGTCTGCTCACAAAGCCCGAAGGGTAATTGATCAGATTCGTGGACGTTCTTACGAGGAAGCCCTTATGATACTCGAACTCATGCCTTATAGAGCATGTTATCCCATTAAAAAATAG
Cyanothamnus anemonifolius	OL591173	0.45	0.519	54.089	rps12	ATGCCAACTATTAAACAACTTATTAGAAACCCAAGACAGCCGATCAGAAACGTTACAAAATCCCCCGCCCTTGGGGGATGCCCTCAGCGCCGAGGAACATGTACAAGGGTGTATACTATCACCCCCAAAAAACCAAACTCTGCCTTACGTAAAGTTGCCAGAGTACGATTAACCTCTGGGTTTGAAATCACTGCTTATATACCTGGTATTGGCCATAATTCACAAGAACATTCTGTAGTCTTAGTAAGAGGGGGGAGGGTTAAGGATTTACCCGGTGTGAGATATCACATTGTTCGAGGAACCCTAGATGCTGTCGGAGTAAAGGATCGTCAACAAGGGCGTTCTAGTGCGTTGTAG
Cyanothamnus anemonifolius	OL591173	0.3636	0.3262	34.855	psbA	ATGACTGCAATTTTAGAGAGACGCGAAAGCGAACGCCTATGGGGGCGCTTCTGTAACTGGATAACTAGCACCGAAAACCGCCTTTACATTGGATGGTTTGGTGTTTTGATGATCCCTACTTTATTGACCGCAACTTCTGTATTTATTATCGCCTTCATTGCTGCCCCTCCCGTAGATATTGATGGTATTCGTGAACCTGTTTCTGGATCTCTACTTTATGGAAACAATATTATTTCTGGTGCAATTATTCCTACTTCTGCAGCTATAGGTTTGCACTTTTACCCGATATGGGAAGCGGCATCTGTTGATGAATGGTTATATAATGGCGGTCCTTATGAGCTAATTGTTCTACACTTCTTACTTGGTGTAGCTTGTTACATGGGTCGTGAGTGGGAACTT…
Cyanothamnus anemonifolius	OL591173	0.5466	0.3954	51.4941	matK	ATGAAGGAATTTAAAGTCCATTTAGAACTAGATAGATTTCAACAAGACGACTTACTCTACCCGCTTCTTTTTCGAGAATATATTTATGCACTTGCTCATGATCATGGTTTAAATAGTTCGATGATTTCATTGGAAAGTGTGGCTTATGACAATAAATCTAGTTCCCTGAGTGTGAAACGGTTAATTACTCGAATGTATCAACCGATTAATTTGAGTATTGCTGCTAATGAGTCTAACAAAAATCCAATTTTTTGGCACAACAATAAGTTGTATTCTCAAATTATATCAGAGGGATTTGCTGTTGTGGTGGAAATTCCATTTTCCCTATGGTTGGCAGCTTTTTTAGAAGGGAAAGAAGTTGAAAAATCTCATAATTTCCAATCAATTCATTCAATATTT…
Cyanothamnus anemonifolius	OL591173	0.6	0.4706	61	rps16	ATGGTAAAACTTCGTTTGAAACGATGTGGTAGAAAGCAACGTGTCGTTTATCAAATCGTTGCAATTT
Cyanothamnus anemonifolius	OL591173	0.4706	0.3333	37.9365	psbK	ATGCTTAATATATTTCGTTTAATGTATATCTGTTTTAATTCTGCCCTTTATTCGAGTAGTTTTTTATTCGCCAAATTGCCCGAGGCCTACGCTTTTTTGAATCCAATTGTAGATGTTATGCCAGTAATACCTGTTCTATTTTTTCTCTTAGCCTTTGTTTGGCAAGCTGCTGTAAGTTTTCGATGA
Cyanothamnus anemonifolius	OL591173	0.3333	0.4211	61	psbI	ATGCTTACTCTCAAACTCTTTGTTTACACCGTAGTGATATTCTTTGTTTCTCTCTTCATCTTCGGATTCCTGTCTAATGATCCGGGGCGGAATCCCGGACGCGAAGAATAA
Cyanothamnus anemonifolius	OL591173	0.4795	0.489	47.533	atpA	ATGGCAACAATTAAAGCCGACGAAATTAGTAATATTATCCGTGAACGTATTGAGCAATATAATAGAGAAGTAAAGATTGTAAATATTGGTACCGTACTTCAAGTAGGCGACGGCATCGCCCGTATTTACGGTCTTGATGAAGTAATGGCAGGTGAATTAGTAGAATTTGAAGAGGGTACAATAGGCATTGCTCTTAATTTGGAATCAAATAATGTTGGTGTTGTTTTAATGGGTGACGGTTTAATGATACAAGAGGGAAGTTCTGTAAAAGCAACCGGAAAAATTGCTCAGATACCAGTAAGCGAGGCTTATTTAGGTCGTGTTATAAATGCCCTGGCTAAACCTATTGATGGTCGAGGTGAAATTTCAGCTTCTGAATCTCGATTAATTGAATCTCCC…
Cyanothamnus anemonifolius	OL591173	0.5738	0.5	55.0846	atpF	ATGAAAAATGTAACCGATTCTTTCGTTTCTTTGATTCACTGGCCATTCGCCGGGAGTTTTGGGTTTAATACCGATATTTTAGCAACAAATCCAATAAATCTAAGTGTAGTGATTGGTGTATTGATTTTTTTTGGAAAGGGAGTGTTAAGTGATTTATTAGATAATCGCAAACGTAGGATCTTAAATAGTATTCGAAATTCAGAAGAACTGCAGGACGGGGCCGTTCAACGGCTGGAAAAAGCCCGGGCCCGGTTACGGAAAGTCGAAATAGAAGCGGATCAGTTTCGAGTGAACGGATATTCTGAGATAGAACGAGAAAAATTCAATTTCATTAATTTAACTTCTAAGACTCTGGACCAATTAGAAAATTACAAAAATGAAACCATTCATTTTGAACAA…
Cyanothamnus anemonifolius	OL591173	0.6818	0.4	52.2037	atpH	ATGAATCCACTGATTTCTGCCGCTTCCGTTATTGCCGCTGGATTGGCTGTTGGGCTTGCTTCTATTGGACCTGGAGTTGGTCAAGGTACTGCTGCAGGCCAAGCAGTCGAGGGGATTGCGAGACAACCCGAGGCGGAGGGAAAAATACGAGGTACTTTATTGCTTAGTCTGGCTTTTATGGAAGCTTTAACAATTTATGGACTAGTTGTAGCCTTAGCGCTTTTATTTGCGAATCCTTTTGTTTAA
Cyanothamnus anemonifolius	OL591173	0.4054	0.4483	57.926	atpI	ATGAATGTTCTATCATGTTCCATCAACACACTAAAGGCGTTATACGATATATCCGGTGTGGAAGTAGGCCAACATTTCTATTGGAAAATAGGCGGGTTCCAAGTCCATGCCCAAGTACTTATTACTTCTTGGGTTGTAATTGCTATCTTATTAGGTTCAGCCTTTCTAGCCGTTCGGAATCCACAAACCATTCCAACTGCCAGTCAAAATTTCTTCGAATATGTCCTTGAATTCATTCGAGACGTGAGCAAAACTCAGATTGGAGAAGAATATGGCCCATGGGTTCCCTTTATTGGAACTATGTTTCTTTTTATTTTTGTTTCGAATTGGTCAGGTGCTCTTTTACCGTGGAAAATCATAGAGTTACCTCATGGGGAGTTAGCCGCACCCACGAATGAT…
Cyanothamnus anemonifolius	OL591173	0.5714	0.4611	56.0342	rps2	ATGTCAAGAAGATATTGGAACATCCATTTGGAAGAGATGATGGAAGCAGGAATTCATTTTGGTCATGGTACTCGGAAATGGAATCCTAGAATGGCACCTTATATATCTGCAAAACACAAAGGTATTCATATTACAAATCTTACTCGAACTGCTCGTTTTTTATCAGAAGCTTGTGATTTAGTTTTTGATGCAGCAAGTAGGGGAAAACTATTCTTAATTGTTGGTACTAAAAATAAAGCAGCCGATTCAGTCGCGCGAGCTGCAATAAAGGCTCGGTGTCATTATGTTAATAAAAAATGGCTCGGTGGTATGTTAACGAATTGGTCCACTACAGAAACGAGACTTCACAAGTTCAGGGATTTGACAACGGAACAAAAAAAGGGGAGACTTGACAGTCTT…
Cyanothamnus anemonifolius	OL591173	0.5574	0.4709	51.921	rpoC2	ATGTCAGAACGAGTGAGTCTGGTCTTTCACAKTAAAATGATAGATGGAACTGCTATTAAACGACTTATTAGCAGGTTAATAGATCACTTCGGGATGGCATATACATCACACATCCTGGATCAAGTAAAGGCGCTGGGTTTCCAGCAAGCCACTGCTACATCTATTTCATTAGGCATTGATGATCTTTTAACAATACCTTCTAAGCGATGGCTAGTCCAAGACGCTGAACAACAAAGTTTTATTTTGGAAAAACACCATCATTGTGGGAATGTCCACGCGATAGAAAAACTACGGCAATCCATTGAGATATGGTATGCTACAAGTGAATATTTGCGACAAGAAATGAATCCTAATTTTAGGATGACTGATCCCTTTAATCCAGTCCATATAATGTCTTTT…
Cyanothamnus anemonifolius	OL591173	0.6077	0.4686	48.1445	rpoC1	ATGATTGATCGATATAAACATCAACAACTCCGAATTGGATCAGTTTCTCCGCAACAAATAAGCGCTTGGGCCAATAAAATCCTACCTAATGGAGAGATAGTTGGAGAAGTGACAAAACCCTATACTTTTCATTACAAAACCAATAAACCGGAAAAAGATGGATTATTTTGTGAAAGAATTTTTGGGCCTATTAAAAGTGGAATTTGCGCTTGTGGAAATTATCGAATAATCGGAGATGAAAACCCGCAATTTTGMGAACAATGTGGAGTTGAATTTGTTGATTCTCGGCTACGAAGATATCAAATGGGATACATAAAACTTGGGTGCCCAGTAACCCACGTGTGGTARTTGKAACGTCTTCCTAGTTATATNNNNAATCTTTTAGATAAACCTCTTAAA…
Cyanothamnus anemonifolius	OL591173	0.6211	0.4793	50.3678	rpoB	ATGCTCGGAAATGGAAATGCAGGAATGTCTACAATACCTGGGTTGAATCAGATACAATTTGAAGGCTTTTGTAGATTCATTGATCGGGGCTTAACAGAAGAACTTTATAAGTTTCCAAAAATTACAGATACAGATCAAGAAATTGAATTTCAATTATTTGTGGAAACATATCAATTGGTGGAACCCTTGCTAAAAGAAAGAGATGCTGTATATGAATCATTCACGTATTCTTCTGAATTATATGTATCTGCAGGATTAATTTGGAAAAGCCGAGGGGATATGCAGGAACAAACAATTTTTATTGGAAACATTCCTCTAATGAATTCTTTGGGAACTTCTATAGTAAATGGAATATACAGAATTGTTATCAATCAAATATTGCAAAGTCCAGGTATCTAT…
Cyanothamnus anemonifolius	OL591173	0.5455	0.5263	29.2857	petN	ATGGATATAGTAAGTCTCGCTTGGGCTGCTTTAATGGTAGTCTTTACATTTTCCCTTTCGCTCGTAGTATGGGGAAGAAGTGGACTCTAG
Cyanothamnus anemonifolius	OL591173	0.4444	0.4231	45.1818	psbM	ATGGAAGTAAATATTCTCGCATTTATTGCTACTACACTGTTCGTTCTAGTTCCTACTGCCTTTTTGCTTATAATATACGTAAAAACGGTCAGTCAAAATGATTAA
Cyanothamnus anemonifolius	OL591173	0.4538	0.3702	51.398	psbD	ATGACTATAGCCCTTGGTAAATTTACCAAAGATGAAAAAGATTTATTTGATATTATGGATGACTGGTTACGGAGGGACCGATTTGTTTTTGTAGGTTGGTCCGGTCTATTGCTCTTTCCTTGTGCCTATTTCGCTTTAGGGGGTTGGTTCACAGGCACAACCTTTGTAACTTCATGGTATACCCATGGATTGGCCAGTTCCTATTTGGAAGGCTGCAACTTCTTAACCGCCGCAGTTTCAACTCCTGCTAATAGTTTAGCACATTCTTTGTTGTTACTATGGGGTCCTGAAGCACAAGGGGATTTTACTCGTTGGTGTCAATTAGGCGGTCTTTGGACTTTTGTTGCTCTCCACGGTGCTTTCGGACTAATAGGTTTCATGTTACGTCAATTTGAACTT…
Cyanothamnus anemonifolius	OL591173	0.52	0.3968	49.447	psbC	GTGGAAACGCTCTTTAATGGAACTTTAGCTGTAGCAGGTCGTGACCAAGAAACCACCGGGTTTGCTTGGTGGGCCGGGAATGCCCGACTTATCAATTTATCCGGTAAACTGCTGGGCGCTCATGTAGCCCATGCTGGATTAATCGTATTCTGGGCCGGAGCAATGAACCTATTTGAAGTGGCTCATTTCGTACCCGAAAAGCCCATGTATGAACAAGGATTAATTTTACTGCCCCACCTAGCTACTCTAGGCTGGGGAGTAGGTCCTGGTGGGGAAGTTATAGACACCTTTCCATACTTTGTATCTGGAGTACTTCACTTAATTTCCTCTGCTGTATTGGGCTTTGGCGGTATTTATCATGCCCTTCTGGGACCTGAGACTCTTGAAGAATCTTTTCCA…
Cyanothamnus anemonifolius	OL591173	0.5714	0.3333	56.6473	psbZ	ATGACTATTGCTTTCCAATTGGCTGTTTTTGCATTAATTGCTACTTCATCAATCTTACTGATTAGTGTACCCGTTGTATTTGCTTCTCCGGATGGTTGGTCGAGTAACAAAAATGTCGTATTGTCTGGTACATCGGTGTGGATTGGATTAGTCTTTCTGGTGGGTATCCTTAATTCTCTCATCTCTTAA
Cyanothamnus anemonifolius	OL591173	0.6944	0.5692	53.0008	rps14	ATGGCAAGGAAAAGTTTGATTCAGAGGGAGAAGAAAAGGCAAAACTTGGAACAAAAATATCATTTGATTCGTCGATCCTCAAAAAAAGAAATAAACAAAGTTCCGTTGTTGAGCGATAAATGGAAAATTCATGGAAAGCTACAGTCCTCACCGCGTAATAGTGCACCTACACGTCTTCATCGACGTTGTTTTTCGACCGGAAGGCCAAGAGCTAACTATCGAGACTTTGGACTATCCGGGCACAAACTTCGTGAAATGGTTCACGCATGTTTGTTGCCGGGAGCAATAAGATCAAGTTGGTAA
Cyanothamnus anemonifolius	OL591173	0.5407	0.3804	51.4868	psaB	ATGGCATTAAGATTTCCAAGGTTTAGCCAAGGCTTAGCTCAGGACCCCACCACTCGTCGTATTTGGTTTGGTATTGCTACCGCACATGACTTTGAGAGTCATGATGATATTACTGAAGAACGTCTTTATCAGAATATTTTTGCTTCTCACTTCGGGCAATTAGCAATAATTTTTATGTGGACTTCCGGAAATCTCTTTCATGTAGCTTGGCAAGGAAATTTTGAAGCATGGGTACAGGACCCTTTACATGTAAGACCTATTGCTCATGCTATTTGGGATCCTCATTTTGGTCAACCGGCCGTGGAAGCCTTTTCTCGTGGGGGCGCTCTTGGCCCGGTGAATATCGCTTATTCTGGTGTTTATCAGTGGTGGTATACAATCGGTTTACGCACTAATGAG…
Cyanothamnus anemonifolius	OL591173	0.5157	0.416	52.6546	psaA	ATGATTATTCGTTCGCCGGAACCAGAAGTAAAAATTTTGGTAGATAGGGATCCCATAAAAACTTCTTTCGAAGAATGGGCTAGACCGGGTCATTTCTCAAGAACCATAGCTAAGGGACCTGATACTACCACTTGGATCTGGAACCTACATGCTGATGCTCACGACTTTGATAGCCATACCAGTGATTTGGAGGAGATCTCCCGAAAAGTATTTAGTGCCCATTTTGGACAACTCTCCATCATTTTTCTTTGGCTAAGTGGCATGTATTTCCACGGTGCTCGTTTTTCCAATTATGAAGCCTGGCTAAGCGATCCTACTCACATTGGGCCCAGTGCACAGGTGGTTTGGCCAATAGTGGGCCAAGAAATATTGAACGGCGATGTGGGCGGGGGTTTCCGA…
Cyanothamnus anemonifolius	OL591173	0.5273	0.4522	50.8241	ycf3	ATGCCTAGATCGCGGATAAATGGAAATTTTATTGATAAGACCTTTTCAATTGTAGCCAATATATTATTACGAATAATTCCGACAACTTTAGGAGAAAAGGAGGCATTTAGCTATTACAGAGATGGTGCGATGTCAGCTCAATCTGAAGGCAATTATGCTGAAGCTTTACAAAATTATTATGAAGCTATGCGACTCGAAATTGATCCCTACGATCGAAGCTATATACTCTATAACATAGGCCTTATCCACACAAGTAACGGAGAACATACAAAAGCTTTAGAATATTATTTTCGGGCACTCGAACGAAATCCATTCTTACCACAAGCTTTTAATAATATGGCTGTGATCTGTCATTACCGGGGAGAACAGGCCGTTCGTCAGGGAGATTCTGAAATTGCG…
Cyanothamnus anemonifolius	OL591173	0.4746	0.4897	61	rps4	ATGTCACGTTACCGAGGGCCTCGTTTCAAAAAAATACGCCGTCTGGGGTCTTTGCCGGGACTCACGGGTAAAGGGCCTAGAGCCGGAAGCGGTTTTAGAAACCAATCGCGCTCCGGAAAAAAATCTCAATATCGAATTCGTTTAGAAGAAAAACAAAAATTGCGTTTTCATTATGGTCTTACAGAACGACAATTACTTAAATATGTTCGTATCGCCGGAAAAGCCAAAGGGTCAACCGGCCTGGTTTTACTCCAATTACTTGAAATGCGTTTGGATAATATCCTTTTTCGATTGGGTATGGCTTCAACTATTCCTCAAGCCCGCCAATTAATTAACCATCGACATATTTTAGTTAATGGGCGTATAGTCGATATACCGAGTTATCGTTGCAAACCCCGA…
Cyanothamnus anemonifolius	OL591173	0.6111	0.419	61	ndhJ	ATGCAGGGTCGTTTGTCTGCTTGGCTAGTCAAGCATGGGATAGTTCATAGATCTTTGGGCTTCGATTACCAAGGAATAGAAACTTTACAAATAAAGCCCGAGGATTGGCATTCCGTTGCTGTCGTTTTGTATGTATATGGTTACAATTATCTACGTTCCCAATGTGCCTATGATGTAGCACCGGGTGGACTGTTAGCCAGCGTGTATCATCTTACACGACTAAAGTATGCTGTAGATCAACCCGAAGAGGTATGCATAAAAGTATTTGCTCCAAGGAGTAATCCTAAAATCCCATCTGTTTTCTGGGTTTGGAAAAGTGCGAATTTTCAAGAACGGGAATCTTATGATATGTTGGGACTCTTTTATGATAATCATCCACGGCTGAAACGTATCTTAATG…
Cyanothamnus anemonifolius	OL591173	0.5217	0.4416	60.6877	ndhK	ATGAATTCCATTGAATTTTCTTTACTTGATCGAACAACCCCAAATTCATTTATTTCAACTACATCAAACGATCTTTCCAATTGGTCAAGACTCTCCAGCTTATGGCCGCTTCTTTATGGTACCAGTTGTTGTTTCATTGAATTTGCTTCATTAATTGGCTCGCGGTTCGATTTTGACCGTTATGGACTGGTACCACGATCGAGCCCTAGACAGGCGGACCTAATTTTAACAGCCGGTACCGTAACAATGAAAATGGCTCCWTCTTTAGTGAGATTATATGAACAGATGCCTGAACCAAAATATGTTATTGCTATGGGAGCATGTACAATTACAGGGGGGATGTTCAGTACTGATTCGTATAGTACTGTTCGAGGAGTTGATAAGCTAATTCCTGTGGAT…
Cyanothamnus anemonifolius	OL591173	0.6061	0.4205	61	ndhC	ATGTTTCTGCTTTACAAATATGATATTTTCTGGGCATTTCTAATAATATCAAGCGTTATTCCTATTTTGGCATTTCGAATTTCCGCAGTTTTAGCCCCGATTATCAAAGGGCCAGAAAAACTTTCTAGTTATGAATCGGGTCTAGAACCAATGGGTGATGCTTGGTTACAATTTCGAATCCGGTATTATATGTTTGCTCTCGTTTTTGTTGTTTTTGATGTTGAAACCGTTTTTCTTTATCCATGGGCAATGAGTTTTGATGTATTAGGGATATCCGTATTTATAGAAGCTTTCATTTTCATGCTTATCCTAATTGTTGGTTCAGTTTATGCGTGGCAAAAAGGAGCATTAGAGTGGTCTTAG
Cyanothamnus anemonifolius	OL591173	0.6047	0.4778	52.8592	atpE	ATGACCTTAAATCTTTGTGTACTGACCCCGAATCGAATTGTTTGGAATTCAGAAGTGAAAGAAATCATTTTATCCACTAATAGTGGACAAATAGGCGTATTACCAAATCATGCGCCTATTGCCACAGCTGTAGATATAGGCATTTTAAGAATCCGCTTTAACGACCAATGGGTAACGATGGCTCTGATGGGTGGTTTTGCTAGAATAGGGAATAATGAGATCACTATTTTAGTAAATGATGCGGAGAAGAGTAGTGACATTGATCCCCAAGAAGCCCAGCAAACTCTTGAAAAAGCGGAAGCTAGTTTGAGGAAAGCTGAAAGTAAGAGACAAACAATTGAGGCAAATCTGGCTCTCAGACGAGCTAGGACACGAGTAGAGGTTATCAATGCGATTTGA
Cyanothamnus anemonifolius	OL591173	0.5375	0.4599	52.2111	atpB	ATGAGAATAAATCCTATTACTCCCGGCCCTGGGGTTTCCGCGCTCCCAAAAAAAAACCTGGSACATATCGCTCAAATCATTGGTCCGGTACTGGATGTAGCCTTTCCCCCCGGGAAGATGCCTAATATTTACAATGCTCTAGTAGTTAAGGGTCGWGATACTGTCGGTCAWCCTATTAATGTGACTTGCGAGGTACAGCAATTATTGGGGAATAATCGGGTTAGAGCTGTAGCCATGAGTGCTACAGATGGTCTAACGAGAGGGATGGAAGTAATTGACACGGGAGCTCCTCTAAGTGTTCCAGTCGGCGGAACGACTCTAGGACGAATTTTCAACGTGCTTGGGGAGCCTGTTGATAATTTAGGTCCGGTAGATACTCGTACAACATCCCCTATTCAT…
Cyanothamnus anemonifolius	OL591173	0.4834	0.4215	52.0362	rbcL	ATGTCACCACAAACAGAGACTAAAGCGAGTGTTGGATTCAAAGCCGGTGTTAAAGATTATAAATTGACTTATTATACTCCTGACTATGTAACCAAAGATACTGATATCTTAGCAGCATTCCGAGTAACTCCTCAACCCGGAGTTCCACCCGAGGAAGCGGGGGCTGCCGTAGCTGCGGAATCCTCTACTGGTACATGGACAACTGTGTGGACCGACGGGCTTACCAGCCTTGATCGTTACAAAGGGCGATGCTACAACATTGAGCCCGTTGCTGGCGAAGAAAATCAATATATATGTTATGTAGCTTACCCGCTAGACCTTTTTGAAGAAGGTTCTGTTACTAACATGTTTACTTCCATTGTGGGTAATGTATTTGGTTTCAAAGCCCTGCGCGCTCTA…
Cyanothamnus anemonifolius	OL591173	0.5238	0.3553	48.1959	accD	ATGAAAAAAAGGTGGTTCAATTCGATGTTATCTAAGGGTAAAGGGGAATTAGAATACAGGTGTGGTTTAAGTAAATCAATGGATAGTTTTGGTCCTATTAAAAATACCGGTGGAAACGAGGACTCAATTCGAAATGATAAGGATAAAAACATTCATAGTTCGAGTGATAGTGACTGTTCGAGTTACAGCAATTTAGCAGGTGTCAGGGACATTCGTAATTTCATCTCAAATGACACCTTTTTTGTTAAGGATAGTAATAGGGACTGCTATTCCATAGATTTTGATATTGAAAATCAAATTTTGGAAATAGACAATGATCATTCTTTTCTGAGTGAACTAGAAAGTTCTTTTTATAGTTTTCGTAATTATAGTTCTAGGAATACTGGATCCAAAAGTGAT…
Cyanothamnus anemonifolius	OL591173	0.5833	0.4231	61	psaI	ATGACAATTCTCAACAGTTTTCCCTCTATTTTAGTCCCTTTAGTGGGCCTAGTATTTCCGGCAATGGCAATGGCTTCGTTATTTCTTTATCTTGAAAAAAATAAGATTTTTTAA
Cyanothamnus anemonifolius	OL591173	0.5147	0.4274	52.6713	ycf4	ATGAGTTGGCGATCAGAATATATATGGATAGAATTTATAGCGGGCTCTCGCAAAACAAGCAATGTCTGCTGGGCCCTTATCCTTTTTTTAGGTTCAGTAGGATTCTTAGTGGTTGGAATTTCTAGTTATCTTGATAGGAATTTGCTATCTTTCTTTCCGCCTCAGCAAATCAATTTTTTTCCACAAGGGATCGTGATGTCTTTCTACGGGATCGCGGGTCTCTTCATTAGTTCCTATTTGTGGTGCACAATTACATGGAATGTAGGTAGCGGTTATGATCGATTTGATACAAAAGAGGGAATAGTGTGTATTTTTCGTTGGGGATTTCCGGGAAAAAATCGCCGCATCTTTCTACGATTCCTTATGAAAGATATTCAATCCATCAGAATAGAAGTTAAA…
Cyanothamnus anemonifolius	OL591173	0.4648	0.4242	60.3028	cemA	ATGACAAAAAAAAACAACGCATCCATTCCCCTTAGATATCTTTCATCTATAGTATTTGTAGTATTTTTGCCCTGGTGGATCCCTCTCTCATTTAATAAAAGTCTGGAATCTTGGGTTACAAATTGGTGGAATACTAGTCAACCCGAAACCTTCTTGAATGATATTCAAGAAAAGTCTATTCTAGAAAAATTCATAGAATTAGAGGAATTATTCCTCTTGGACGAAATGATAAAGGAATTTCCGGAAAGACGTCTAGAAAAGCTTCGTATAGGGCTCCCAAAAGAAACAATTCAATTAATCAAGATGCACGATGAGGATCATATCCATACGATTTTTCACTTCTCGACAAATACAATATGCTTCATTATTCTAAGCGGTTATTCCATTCTGTGTAACGAA…
Cyanothamnus anemonifolius	OL591173	0.5755	0.4419	60.032	petA	ATGCAAATTCGAAATAGCTTTTCTTCGTTAAAGGGAGAGATTACTCAACTCATTTCCGTATCCCTGATAATATATATAATAACTCGGGCATCCATTTCAAATGCATATCCTGTTTTTGCGCAGCAGGGTTTTGAAAATCCACGAGAGGCAACTGGTCGCATTGTATGCGCCAATTGTCATTTAGCTAATAAGCCCGTGGATATTGAGGTTCCGCAAGCGGTACTCCCTGATACTGTATTTGAAGCAGTTGTTAGAATTCCGTATGATATGCAACTGAAACAAGTTCTTGCTAATGGTAAAAAGGGGTCTTTAAATGTGGGGGCCGTTCTTATTTTACCAGAGGGGTTTGAATTAGCCCCCTCCGACCGTATTTCGCCCGAGATGAAAGAAAAGATAGGC…
Cyanothamnus anemonifolius	OL591173	0.6154	0.3571	61	psbJ	ATGGCCGATACTACTGGAAGGATTCCCCTTTGGATAATAGGTACTGTAACTGGTATTATAGTGATTGGTTTAATAGGCATTTTCTTTTATGGTTCATATTCGGGATTAGGTTCGTCCTTGTAG
Cyanothamnus anemonifolius	OL591173	0.3333	0.4583	61	psbL	ATGACACAATCAAACCCGAACGAACAAAATGTTGAATTGAACCGTACTAGTCTCTACTGGGGGTTATTACTCATTTTTGTACTTGCCGTTTTATTTTCCAATTACTTTTTCAATTAA
Cyanothamnus anemonifolius	OL591173	0.5625	0.625	61	psbF	ATGACCATAGATCGAACCTATCCAATTTTTACAGTGCGATGGTTGGCCGTGCACGGACTAGCTGTACCTACCGTTTCTTTTTTGGGGTCAATATCAGCAATGCAGTTCATCCAACGATAA
Cyanothamnus anemonifolius	OL591173	0.4074	0.4035	53.436	psbE	ATGTCTGGAAGCACAGGAGAACGTTCTTTTGCTGATATTATTACCAGTATTCGATACTGGGTCATTCATAGCATTACTATACCTTCCCTATTCATTGCGGGTTGGTTATTTGTCAGCACGGGGTTAGCTTACGATGTGTTTGGAAGCCCTCGTCCAAACGAGTATTTTACAGAGAGCCGACAAGGAATTCCATTAATAACCGGACGTTTTGATTCTTTGGAACAACTCAACGAATTTAGTAGATCTTTTTAG
Cyanothamnus anemonifolius	OL591173	0.5	0.375	32.8919	petL	ATGCCTACTATAACTAGTTATTTTGGTTTTCTCCTAGCAGCCTTAACTATAACCTCGGCTCTATTTATTGGTCTGAGCAAGATAGGACTTATTTGA
Cyanothamnus anemonifolius	OL591173	0.3636	0.5185	61	petG	ATGATTGAAGTCTTTCTATTTGGAATCGTCTTAGGTTTAATTCCTATTACTTTGGCAGGATTATTCGTAACCGCATATTTACAATACAGACGTGGTGATCAGTTGGACCTTTGA
Cyanothamnus anemonifolius	OL591173	0.6316	0.6154	61	psaJ	ATGCGAGATCTAAAAACATATCTTTCCGTGGCACCGGTACTAAGTACTCTATGGTTCGGGTCTTTAGCAGGGTTATTGATAGAAATCAACCGTTTGTTCCCGGACGCATTGACATTTCCGTTTTTTTCATTCTAG
Cyanothamnus anemonifolius	OL591173	0.6364	0.4255	35.7194	rpl33	ATGGCCAAGGGTAAAGATGTCCGAGCAAGGGTTATTTTGGAATGTACTTGTTGTGTTCGAAACAGTGTTAATAAGGAATCAAGGGCAAGGGGTATTTCCAGATATATTACTCAAAAGAATCGACACAATACACCTAGTCGATTGGAATTGAGAAAATTCTGTCTCTATTGTTACAAACATACGCTTCATGGGGAGATAAAAAAATAG
Cyanothamnus anemonifolius	OL591173	0.625	0.5	61	rps18	ATGGATAAAACCAAGCGACTCTTTCTTAAATCCAAGCGATCTTTTCGTAGGCGTTTGCCCCCGATTGTATCGGGGGATCGAATTGATTATAGAAACATGACTTTAATTAGTCGATTTCTTAGTGAACAAGGAAAAATATTATCTAGACGGGTGAATAGATTGACCTTAAAAGAACAACGATTAATTACTATTGCTATAAAACAAGCTCGTATTTTATCTTCGTTACCTTTTCTTAATAATGACAAACAATTTGAAAGAAGTGGATCGACCAATAGAACTCCAGGTCTTCGAACCAGAAAAAAATAG
Cyanothamnus anemonifolius	OL591173	0.6786	0.4889	61	rpl20	ATGACCAGAATTAAACGAGGATATATAGCTCGGAGACGTAGAACAAAAATGCGTTTATTTGCATCAAGCTTTCGCGGGGTTCATTCAAGACTTAGTCGAACAATTACTCAACAGAAAATAAGAGCTTTGGTTTCGGCTTATCGTGATAGCGATAGACAAAAAAGGGATTTTCGTCGTTTGTGGATCACACGAATAAATGCAGTAATTGGCGGAAACAAAGTATCCTATATTTATAGTACATTAATAAAAAATCTGTATAAGGCGCGGCTGGTTCTTAATCGTAAGATACTTGCACAAATAGCTATATCAAATAGGAATTGTCTTTATATGATTTCCAATGAGATTATAAAATAA
Cyanothamnus anemonifolius	OL591173	0.3833	0.4746	55.2959	rps12	CTACAACGCACTAGAACGCCCTTGTTGACGATCCTTTACTCCGACAGCATCTAGGGTTCCTCGAACAATGTGATATCTCACACCGGGTAAATCCTTAACCCTCCCCCCTCTTACTAAGACTACAGAATGTTCTTGTGAATTATGGCCAATACCAGGTATATAAGCAGTGATTTCAAACCCAGAGGTTAATCGTACTCTGGCAACTTTACGTAAGGCAGAGTTTGGTTTTTTGGGGGTGATAGTATGCCAACTATTAAACAACTTATTAGAAACCCAAGACAGCCGATCAGAAACGTTACAAAATCCCCCGCCCTTGGGGGATGCCCTCAGCGCCGAGGAACATGTACAAGGGTGTAT
Cyanothamnus anemonifolius	OL591173	0.5217	0.4961	60.737	clpP1	ATGCCTATTGGTGTTCCAAAAGTACCTTATCGAAGTCCCGGGGACAAGCATCCATCTTGGATTGACATCAACCGACTTTATCGAGAAAGATTACTTTTTTTAGGTCAAATGGTTGAGAGTGATATCTCGAATCAACTTATTGGTATTATGGTATATCTCAGTATAGAGAACGAGACCAAGGATTTGTATTTATTTATCAACTCTCCTGGCGGATGGGTAATACCCGGAATAGCAATTTATGATACTATGCAATTTGTGCGACCAGATGTACAGACAATATGCATGGGATTGGCCGCCTCCATGGGGTCTTTTCTCCTGGCCGCAGGAGCAAGTACCAAACGTCTAGCATTCCCTCACGCTAGGGTCATGATCCATCAACCTTTTGGCGCTTTTTATGGG…
Cyanothamnus anemonifolius	OL591173	0.5438	0.4269	49.0044	psbB	ATGGGTTTGCCTTGGTATCGTGTTCATACCGTCGTATTGAATGATCCCGGTCGTTTGATTGCTGTCCATATAATGCATACAGCCCTGGTTGCGGGTTGGGCCGGTTCAATGGCTCTATATGAATTAGCTGTTTTTGATCCCTCCGATCCAGTTCTTGATCCAATGTGGAGACAAGGTATGTTCGTTATACCCTTCATGACTCGTTTAGGAATAACCGATTCATGGGGCGGTTGGAGTATTACAGGGGGGACGGTAACGAATCCGGGTATTTGGAGCTACGAAGGGGTAGCCGGGGCACATATTGTATTTTCGGGCTTGTGCTTCTTGGCAGCTATCTGGCATTGGGTATATTGGGATCTAGCAATATTTGTGGATGACCGTACGGGAAAACGGTCTTTG…
Cyanothamnus anemonifolius	OL591173	0.4444	0.52	42.1538	psbT	ATGGAAGCATTGGTTTATACATTCCTTTTAGTCTCGACTCTAGGGATCATTTTTTTCGCTATCTTTTTTCGAGAACCACCTAAAGTTCCAACTAAAAAATGA
Cyanothamnus anemonifolius	OL591173	0.375	0.5714	61	psbN	ATGGAAACAGCAACCCTAGTCGCCATTTCTATATCTGGGTTACTTGTAAGTTTTACTGGGTACGCCTTATATACTGCCTTTGGGCAACCCTCTCAACAACTAAGAGATCCATTCGAGGAACACGGGGACTAA
Cyanothamnus anemonifolius	OL591173	0.8	0.4082	61	psbH	ATGACTGCACAAACAGTTGAGGATAGTTCTAGAGCTCGTCCAAAAAGGACTTTTGCAGGGGGGTTATTGAAACCCTTGAATTCGGAATATGGTAAAGTGGCTCCTGGATGGGGAACTACTCCTTTGATGGGTATCACAATGGCTCTATTTGCGATATTCCTGTCTATTATTTTAGAGATTTATAATTCGTCCGTTTTACTGGACGGAATTTCAATGAATTAG
Cyanothamnus anemonifolius	OL591173	0.5652	0.4354	54.4041	petB	ATGAGTAAAATCTACGATTGGTTCGAAGAACGTCTCGAGATTCAGGCGATAGCAGATGATATAACTAGTAAATATGTTCCTCCCCATGTCAACATATTTTATTGTCTAGGAGGAATTACGCTTACTTGTTTTTTAGTACAAGTAGCTACAGGGTTTGCTATGACTTTTTACTACCGTCCGACCGTTACTGAGGCTTTTGCTTCTGTTCAATACATAATGACGGAAGCTAACTTTGGTTGGTTAATCCGATCAGTTCATCGATGGTCGGCAAGTATGATGGTCCTAATGATAATCCTGCACGTATTTCGTGTGTATCTCACTGGGGGATTTAAAAAACCTCGCGAATTGACTTGGGTTACAGGCGTGGTTCTGGCTGTATTGACCGCATCTTTTGGTGTA…
Cyanothamnus anemonifolius	OL591173	0.5625	0.4956	46.8803	petD	ATGGGAGTAACAAAAAAACCTGACTTGAACGATCCTGTATTAAGGGCTAAGTTGGCTAAAGGTATGGGTCATAATTATTATGGAGAACCCGCGTGGCCCAATGATCTTTTATATATTTTTCCAGTAGTAATTCTAGGTACTATTGCATGTAACGTAGGCTTAGCGGTTCTAGAACCATCCATGATTGGTGAACCCGCGGATCCGTTTGCAACTCCTTTAGAAATATTACCCGAATGGTATTTCTTTCCTGTATTTCAAATACTTCGTACAGTACCCAATAAGCTGTTGGGTGTTCTTTTAATGGTTTCAGTACCCGCGGGATTATTAACAGTACCCTTTTTGGAAAATGTTAATAAATTCCAAAATCCATTTCGCCGTCCAGTAGCGACAACCGTCTTT…
Cyanothamnus anemonifolius	OL591173	0.5312	0.4913	53.5754	rpoA	ATGGTTCGAGAGAAAGTAAAAGTATCTACTCGTACACTACAGTGGAAGTGTGTTGAATCAAGAGCAGACAGTAAGCGTCTTTCTTATGGACGCTTTATTTTGTCTCCACTTATGAAAGGTCAAGGCGACACAATAGGCAGTGCGATGCGAAGAGTTTTGCTTGGAGAAATCGAAGGAACGTGTATTACACGCGCAAAATCTGAGAAAATACCACATGAATATTCTACCATAGTGGGTATTCAAGAATCGGTACATGAAATTTTAATGAATTTGAAAGAAATTGTATTGAGAAGTAATCTTTATGGAACTTGTGACGCCCTTATTTGTGTCAAAGGTCCTGGATATGTAACTGCTCAAGACATCCTCTTGCCACCTTTTGTAGAAATCGTTGATAAGACG…
Cyanothamnus anemonifolius	OL591173	0.5833	0.4951	50.2338	rps11	ATGGCAAAATCTACATCAAGAAGTGGTTCACGTAGGGCTGGACGGATTGGTTTGCGTAAAAGTGGACGTCGAATACCAAAGGGCGTTATTCATGTTCAAGCAAGTTTCAACAACACCATTGTGACTGTTACGGATGTACGGGGTCGAGTAATTTCTTGGTGCTCGGCCGGTACTTGTGGATTCAGGGGTACAAGAAGAGGTACGCCCTTTGCTGCTCAAATGGCAGCAGGAAGTGCTATTCGAGCAGGAGCGGATCAAGGTATACAACGAGCAGAAGTCATGATAAAAGGTCCTGGTCTGGGAAGAGATGCAGCATTACGAGCTATTCGTAGAAGTGGTATCCTTTTAAATTTCGTACGGGATGTAACCCCTATGCCACATAATGGTTGCAGACCCCCT…
Cyanothamnus anemonifolius	OL591173	0.5833	0.6538	22.75	rpl36	ATGAAAATAAGGGCTTCCGTTCGGAAAATTTGTGAAAAATGTCGACTGATCCGCAGGAGGGGACGAATTATAGTAATTTGTTCCAACCCGAGACATAAACAAAGACAAGGATAA
Cyanothamnus anemonifolius	OL591173	0.4318	0.5385	48.5816	rps8	ATGGGCAAGGACACTATTGCTGACATAATAACTTATATACGAAATGCTGATATGAATCGAAAAGGAACGGTTCAAATAGCATATACTAACATCGCCGAAAACATTGTTAAAATACTTTTGCGAGAGGGTTTTATAGAAAACGTCAGGAAACTCGTCCAAAACAAAAAAGAGTTTTTGGGTTTAACCCTACGACATAGAAGGAATAGGAAAGGACCGTATAGACCCATTTTCAATTTAAAACGAATCAGCCGCCCCGGTCTACGAATCTATTTTAACTATAAAAGAATTCCTCGAATTTTAGACGGGATGGGAATTGTAATTCTCTCTACTTCTCGGGGTATAATGACAGATCGAGCGGCTCGACTAGAAAGAATCGGCGGAGAAATTTTGTGTTATATA…
Cyanothamnus anemonifolius	OL591173	0.5429	0.4659	48.1638	rpl14	ATGATTCAACCTCAAACCCATTTGAATGTAGCGGACAATAGCGGTGCCCAAGAATTGATGTGTATTCGAATCATAGGAGCTAGTAACCGTAGATATGCTCATATTGGTGACGTTATTGTTGCTGTGATCAAGGAAGCAGTACCAAATATGCCTCTAGAAAGATCCGAAGTGGTCAGAGCTGTAATTGTACGTACTTGTAAAGAACTCAGACGCGATAACGGTATGATAATATGTTATGATGACAATGCTGCGGTTGTGATTGATCAAGAAGGAAATCCAAGGGGAACTCGAGTTTTTGGTTCGATCGCCCGAGAATTGAGGCAGTTGAATTTTCCTAAAATAGTTTCATTAGCGCCTGAAGTATTATAA
Cyanothamnus anemonifolius	OL591173	0.5135	0.59	46.5001	rpl16	ATGCTTAGTAACCCAAAAAGAACAAGATTCCGTAAACAACATAGAGGAAGAATGAAAGGAATATCTTATCGAGGTAATCATATTTGTTTCGGCAGATATGCTCTTCAAGCACTTGAACCCGCTTGGATCACATCTAGACAAATCGAAGCAGGACGGCGAGCAATGACACGAAATGTACGGCGTGATGGAAAAATATGGGTACGTGTATTTCCAGACAAACCGGTTACAGTAAGACCCACAGAAACCCGTATGGGGTCCGGGAAAGGATCCCCCGAATATTGGGTAGCTGTCGTTAAACCGGGTAGAATACTTTATGAAATGAGTGGAGTCGCTGAAAATATCGCTCGAAAGGCTATTTCAATAGCGACGTCCAAAATGCCTATAAGAACTCAATTCATT…
Cyanothamnus anemonifolius	OL591173	0.4259	0.5896	42.1821	rps3	GTGGGACAAAAAATAAATCCACTCGGTTTCCGACTTGGTACAACACAAAGCCATCATTCGCTTTGGTTTGCAGCAAAACAAAAAACTTATTGCGAAGGTCTACAAGAAGATCAAAAAATACGAAACATTATTAAGAATTATGTACAAAAAAATATGAGAATCTCCTCCGGTGTTGAGGGAATTGCCTGGATAGAGATTCAAAAAAGAATTGATCTAATTCAAGTCATAATATATATAGGATTCCCCAAATTATTACTAGAAAATAGACCGCGAAGAATTGAAGAATTACAGATGAATGTACAAAAAGAACTTAATTGTGTGAACCGAAAAATAAACATTGCTATTACAAGAATTGGAAATCCTTATGGACACCCCAATATTCTTGCCGAATTTATAGCC…
Cyanothamnus anemonifolius	OL591173	1	1	47	rpl22	ATGATAATGATAATAAAGAAAAAAAGAAAAAGGTAG
Cyanothamnus anemonifolius	OL591173	0.5833	0.4783	61	rps19	GTGACACGTTCACTAAAAAAAAATCCTTTTGTAGTGAATCATTTATTAAGAAAAATCGATAAGCTTAATACAAAAGCGGAAAAAGAAATAATAATAACTTGGTCTCGCGCATCTACCATTATACCCACAATGGTAGGCCATACTATTGCTATCCATAATGGAAGGGAGCATTTGCCTATTTATATAACAGATCGTATGGTCGGACATAAATTGGGAGAATTTGCGCCCACTATCAATTTTCGTGGGCATGCAAAAAATGATAATAGATCCCGGCGTTAA
Cyanothamnus anemonifolius	OL591173	0.5	0.5027	56.062	rpl2	ATGGCGGTACATTTATACAAAACTTCTACCCCGAGCACACGCAATGGAGCCGTAGACAGTCAAGTGAAATCCAATCCACGAAATAATTTGATCTATGGACAGCATCGTTGTGGTAAAGGTCGTAATGCCAGAGGAATCATTACCGCAGGGCATAGAGGGGGAGGTCATAAGCGTCTATACCGTAAAATCAATTTTCGACGGAAGGAAAAAGACATATATGGTAGAATCGTAACCATAGAATACGACCCTAATCGAAATCCATACATTTGTCTCATACACTATGGGGATGGTGAGAAGAGATATATTTTACATCCCAGAGGGGCTATAATTGGAGATACCATTGTTTCTGGTACAGAAGTTCCTATAAAAATGGGAAATGCCCTACCTTTGACCGATATG…
Cyanothamnus anemonifolius	OL591173	0.5714	0.5	61	rpl23	ATGGATGGAATCAAATATGCAGTATTTACAGACAAAAGTATTCGGTTATTGGGGAAAAATCAATATACTTCTAATGTCGAATCAGGATCAACTAGGACAGAAATAAAGCATTGGGTCGAACTCTTCTTTGGTGTCAAGGTAATAGCTATGAATAGTCATCAACTCCCCCGAAAGGATAGAAGAATGGGACCTATTATGGCACATACTGTGCATTACAGACGTATGATCATTACACTTCAACCGGGTTATTCTATTCCACCTCTCAGAAAGAAAAGAACTTAA
Cyanothamnus anemonifolius	OL591173	0.5316	0.4428	53.1992	ycf2	ATGAAAGGACATCAATTAAAATCCTGGATTTTCGAATTGAGAGAGATATTGAGAGAGATCAAGAATTCTCACTATTTCTTAGATTCATGGACCCAATTCAATTCAGTGGGATCTTTCATTCACATTTTTTTCCACCAAGAACGTTTTAGAAAACTCTTGGACCCACGAATTTGGAGTATCCTACTTTCACGCAATTCACAGGGTTCAACAAGCAATCGATATTTCACGATCAAGGGTGTAGTACTATTTGTAGTAGCGATCCTTATATATCGTATTAACAATCGAAATATGGTCGAAAGAAAAAATCTCTATTTGACAGGGCTTCTTCCTATACCTATGAATTCCATTGGACCCAGAACTGATACATTGGAAGAATCTTTTGGGTCTTCCAATATCAAT…
Cyanothamnus anemonifolius	OL591173	0.5714	0.6875	46.5263	ycf15	ATGCTACTGCTGAAACATAGAAGAATTGAAATCTTAGATCAAAACACTATGTATGGATGGTATGAACTGCTTAAACAAGAATTCTTGAACAGCGAACCACCAGAGCTATTACTAACTACATCAAAAAATTTCCATTAA
Cyanothamnus anemonifolius	OL591173	0.4268	0.4553	51.1126	ndhB	ATGATCTGGCATGTACAGAATGAAAACTTCATTCTCGATTCTACGAGAATTTTTATGAAAGCCTTTCATTTGCTTCTCTTCGATGGAAGTTTTATTTTCCCAGAATGTATCCTAATTTTTGGCCTAATTCTTCTTCTGATGATCGATTCAACCTCTGATCAAAAAGATATACCTTGGTTATATTTCATCTCTTCAACAAGTTTAGTAATGAGCATAGCGGCCCTATTGTTCCGATGGAGAGACGAACCTATGATTAGCTTTTCGGGAAATTTCCAAACGAACAATTTCAACGAAATCTTTCAATTTCTTATTTTACTATGTTCAACTCTATGTATTCCTCTATCCGTGGAGTACATTGAATGTACAGAAATGGCTATAACAGAGTTTCTGTTATTCGTA…
Cyanothamnus anemonifolius	OL591173	0.5	0.5763	44.1612	rps7	ATGTCACGTCGAGGTACTACAGAAGAAAAAGCTGCAAAATCCGATCCAATTTATCGTAATCGCTTAGTTAACATGTTGGTTAACCGTATTCTGAAACACGGAAAAAAATCATTGGCTTATCAAATTATCTATCGAGCCTTGAAAAAGATTCAACAAAAGACAGAAAAAAATCCACTATCTGTTTTACGTCAAGCAATACGTGGAGTAACTCCCGATATAGCAGTAAAAGCAAGACGTGTAGGCGGATCGACTCATCAAGTTCCCATTGAAATAGGATCCGCACAAGGAAAAGCACTTGCCGTTCGTTGGTTATTAGGGGCATCCCGAAAACGTCCGGGTCAAAATATGGCTTTCAAATTAAGTTCCGAATTAGTGGATGCTGCCAAAGGGAGTGGCGAT…
Cyanothamnus anemonifolius	OL591173	0.8571	0.5455	61	rpl32	ATGGCAGTTCCAAAAAAACGTACTTCTATATTAAAAAAACATATTCGTAAAAATATTTGGAAAAAGGGAGGGTATTGGTCAACATCGAAGGCTTTTTCCTTATCGAAATCCCTTTCTATTCGGAATTCACAAAGTTTTTTTGTAAAACAAATAAATAAGAAAACGTTGGAATAA
Cyanothamnus anemonifolius	OL591173	0.5275	0.4693	48.5258	ccsA	ATGATCTTTTCAACATTAGAGCATATATTAACGCATATATCCTTTTCGGTCGTTTCAATTGGAATTCCAATCTACTTACTAACCTTATTAGTCGATGAAATAAGAGGACTGTATGATTCATCAGAAAAGGGGATGATAGCTACCGCTTTCTGTCTAACAGGATTATTAATCACCCGTTGGATTTACTCGAGACATTTCCCATTAAGTGATTTATATGAATCATTAATTTTTCTTTCATGGAATTTCTCCATTATTCATAGGATGTTTGATTTTAAAAATAATAAAAATCATTTAAGCCCTATAACGGCACCAAGTGCTATTTTTACCCAAGGCTTTGCGACTTCTGGTTTTTTAACTAAAATACATCAATCCGGAATATTAGTACCTGCTCTCCAAGTC…
Cyanothamnus anemonifolius	OL591173	0.528	0.4568	52.6424	ndhD	ATTGTAGTTTTTCCAATAGTTGCGGGTTCTTTAATTTTCTTTCTCCCTCATAGAGGAAATAAGGTGACTAGAGGATATACAATCTATATATGTGTCTTAGAACTCCTCCTAACGACCTATGCATTCTGTTCTAATTTCCAATTGGATGATCTATTAATCCAGCTGGCCGAGGATGATAAATGGATCACCTTTTTTGATTTTGACTGGCAGTTGGGAATAGATGGACTTTCCATAGGACCCATTTTACTGACGGGATTTATCACTACTTTAGCTACTGTAGCGGCTCGGCCAGTTACTCGGAATTCCCGACTATTCCATTTCCTGATGTTAGCGATGTACAGCGGTCAAATAGGATCATTTTCTTCTCGCGACCTTTTACTTTTTTTCATCATGTGGGAA…
Cyanothamnus anemonifolius	OL591173	0.5652	0.4407	61	psaC	ATGTCACATTCAGTAAAGATTTATGATACATGTATAGGGTGTACTCAATGTGTCCGAGCTTGCCCCACAGATGTATTAGAAATGATACCTTGGGACGGCTGTAAAGCAAAGCAAATTGCTTCTGCTCCAAGAACAGAGGATTGTGTTGGTTGTAAGCGCTGTGAATCCGCCTGTCCAACGGATTTCTTGAGTGTTCGGGTTTATTTATGGCATGAAACAACTCGAAGCATGGGTCTAGCTTATTGA
Cyanothamnus anemonifolius	OL591173	0.5	0.3714	61	ndhE	ATGATACTCGAGCATGTACTTGTTTTGAGTGCCTATTTATTTTCTATTGGTATCTATGGATTGATTACGAGCCGAAATATGGTTCGGGCCCTGATGTGTCTTGAACTTATACTAAATGCAGTTAATATCAATTTCGTAACATTCTCTTATTTTTTTGACAGTAGACAATTAAAAGGCGATATTTTCTCAATTTTTGTTATAGCTATTGCAGCCGCCGAAGCAGCTATCGGATCAGCTATTGTTTCGTCAATTTATCGTAACAGAAAATCGACTCGTATCAATCAATCGACTTTGTTGAATAAGTAG
Cyanothamnus anemonifolius	OL591173	0.5	0.3721	58.7387	ndhG	ATGGATTTGCCTGGACCAATACATGATTTTCTTGTAGTTTTTCTGGGATCTGGTCTTATATTAGGAGGTCTAGGGGTGGTATTATTTAGCAACCCCATTTATTCTGCCTTTTCCTTGGGATTGGTTCTTGTTTGTATATCCTTATTCTATATTCTATCAAATTCCCATTTTGTAGCTGCTGCGCAGCTCCTTATTTACGTCGGAGCTGTAAATGTTTTAATCATATTTGCTGTAATGTTCATGAATGGTTCAAACTATTCGAAAGATTTTCATTCGAATCTTTGGACTGTTGGTCACGGACTTACTTCCCTGGTTTGTACAAGTATTTTTTTTTCAATAATCGCCACTATTCTAGATACGTCGTGGTACGGGATTATTTGGACTACACGACCCAACCAG…
Cyanothamnus anemonifolius	OL591173	0.5385	0.4341	43.7796	ndhI	ATGTTTCCTATGGTAATTAGTTTCATGAATTATGGTAAACAAACAATACGAGCTGCAAGGTACATCGGTCAAAGTTTCATGATTACTTTATCCCAAGCAAATCGTTTACCTGTAACTATTCAATATCCTTATGAAAAATTAATGACATCGGAGCGTTTTCGCGGTCGAATCCATTTTGAATTTGATAAATGTATCGCTTGTGAAGTATGCGTTCGCGTATGTCCGATAGATCTGCCTGTTGTTGATTGGAAATTTGAAACAGATATTCGAAAGAAACGATTACTTAATTACAGTATTGATTTTGGAATTTGTATTTTTTGTGGTAACTGTGTTGAATATTGTCCAACAAATTGTTTATCAATGACTGAAGAATATGAACTTGCTACTTACGACCGGCAC…
Cyanothamnus anemonifolius	OL591173	0.494	0.4982	51.0921	ndhA	ATGATAATTCATAGAACAGAAGTACAAGATATCAATTCTTTTTCCAGATTGGAATCCCTACAAGAGATCTATGGGATCATGTGGGTGCTTGCCCCTATTTTAACTCCTGTAGTGGCAATCACAATAGGTGTCCTAGTAATTGTGTGGTTAGAAAGAGAAATATCCGCAGGAATACAACAACGTATTGGGCCTGAATACGCCAGTCCCTTGGGAATTCTTCAAGCTTTAGCAGATGGGACAAAACTACTTTTCAAAGAAAACCTTCTTCCATCTAGAGGAAATAGTAGTTTATTCAGTATTGGACCGTCTATAGCAGTCATAGTAATTCTACTAAGTTCTTCAGTAATTCCTTTTAGTTATAACCTTGTTTTAGCTGACCTTAATATCGGTATTTTTTTA…
Cyanothamnus anemonifolius	OL591173	0.5752	0.4911	50.7551	ndhH	ATGAGTATACTAGCTACAGAAAAAGAATTTATGATAGTCAATATGGGACCTCATCACCCATCAATGCACGGTGTTCTTCGTCTCATCGTTACTCTAGATGGTGAAGATGTTATTGACTGTGAACCGATATTGGGTTATTTACACCGAGGGATGGAAAAAATTGCGGAAAACCGAACAATTATACAATATCTGCCTTATGTAACCCGTTGGGATTATTTAGCTACTATGTTCACCGAAGCAATAACTGTAAATGGACCCGAACTGTTGGGAAATATTCAAGTACCCAAAAGGGCCAGCTATATCCGAGTAATTATGTTGGAGTTGAGTCGTATAGCTTCCCATCTCTTATGGCTTGGCCCTTTTATGGCAGATATTGGCGCCCAGACTCCTTTCTTCTAT…
Cyanothamnus anemonifolius	OL591173	0.65	0.6197	57.2991	rps15	ATGGTAAAAAATTCATTCGTCTTAGTTGTGGTTCAAGAAAAAAAAGCAGAAAACTGTGGATCAGTTGAATTTCAAGTATTCCGTTTCACTAATAAGATACGGAGACTTACTTCACATTTAGAATTGCACAGAAAAGACTATTTATCTCAAAGAGGTCTACGGAAAATTTTGGAAAAACGACAACGTCTACTAGCGTATTTGTTAAAGAAAAATAGAGTACGTTATAAAGAATTAATTAGTAAGTTGAATATTCGGGAATCAAAAAATCGTTAA
Cyanothamnus anemonifolius	OL591173	0.498	0.5191	48.7929	ycf1	ATGATTGTTCAATCTTTTATACTAGGGAATCAAGTATCCTTATGCATGAAGATAATCAATTCGGTCGTTGTGGTCGGACTCTATTATGGATTTATGACCACATTCTCCATAGGGCCCTCTTATCTCTTCCTTCTCCGAGCTCGGGTTATGGAAGAAGGAACCGAGAAGAAGGTATCAGCAACAACTGGTTTTATTGCGGGACAGCTCATGATGTTCATATCGATCTATTATGCGCCTCTGCATCTAGCATTGGGTAGACCTCATACAATAACTGTCCTAGCTCTACCGTATCTTTTGTTTCATTTCTTCTGGAACAATCCCAAACACTTTTTTGATTATGGATCTACTACCAGACGTAATCTTAGCATTCAATGTGTATTCCTGAATAATCTCATTTTT…
Cyanothamnus anemonifolius	OL591173	0.5	0.5763	44.1612	rps7	ATGTCACGTCGAGGTACTACAGAAGAAAAAGCTGCAAAATCCGATCCAATTTATCGTAATCGCTTAGTTAACATGTTGGTTAACCGTATTCTGAAACACGGAAAAAAATCATTGGCTTATCAAATTATCTATCGAGCCTTGAAAAAGATTCAACAAAAGACAGAAAAAAATCCACTATCTGTTTTACGTCAAGCAATACGTGGAGTAACTCCCGATATAGCAGTAAAAGCAAGACGTGTAGGCGGATCGACTCATCAAGTTCCCATTGAAATAGGATCCGCACAAGGAAAAGCACTTGCCGTTCGTTGGTTATTAGGGGCATCCCGAAAACGTCCGGGTCAAAATATGGCTTTCAAATTAAGTTCCGAATTAGTGGATGCTGCCAAAGGGAGTGGCGAT…
Cyanothamnus anemonifolius	OL591173	0.4268	0.4553	51.1126	ndhB	ATGATCTGGCATGTACAGAATGAAAACTTCATTCTCGATTCTACGAGAATTTTTATGAAAGCCTTTCATTTGCTTCTCTTCGATGGAAGTTTTATTTTCCCAGAATGTATCCTAATTTTTGGCCTAATTCTTCTTCTGATGATCGATTCAACCTCTGATCAAAAAGATATACCTTGGTTATATTTCATCTCTTCAACAAGTTTAGTAATGAGCATAGCGGCCCTATTGTTCCGATGGAGAGACGAACCTATGATTAGCTTTTCGGGAAATTTCCAAACGAACAATTTCAACGAAATCTTTCAATTTCTTATTTTACTATGTTCAACTCTATGTATTCCTCTATCCGTGGAGTACATTGAATGTACAGAAATGGCTATAACAGAGTTTCTGTTATTCGTA…
Cyanothamnus anemonifolius	OL591173	0.5714	0.6875	46.5263	ycf15	ATGCTACTGCTGAAACATAGAAGAATTGAAATCTTAGATCAAAACACTATGTATGGATGGTATGAACTGCTTAAACAAGAATTCTTGAACAGCGAACCACCAGAGCTATTACTAACTACATCAAAAAATTTCCATTAA
Cyanothamnus anemonifolius	OL591173	0.5316	0.4428	53.1992	ycf2	ATGAAAGGACATCAATTAAAATCCTGGATTTTCGAATTGAGAGAGATATTGAGAGAGATCAAGAATTCTCACTATTTCTTAGATTCATGGACCCAATTCAATTCAGTGGGATCTTTCATTCACATTTTTTTCCACCAAGAACGTTTTAGAAAACTCTTGGACCCACGAATTTGGAGTATCCTACTTTCACGCAATTCACAGGGTTCAACAAGCAATCGATATTTCACGATCAAGGGTGTAGTACTATTTGTAGTAGCGATCCTTATATATCGTATTAACAATCGAAATATGGTCGAAAGAAAAAATCTCTATTTGACAGGGCTTCTTCCTATACCTATGAATTCCATTGGACCCAGAACTGATACATTGGAAGAATCTTTTGGGTCTTCCAATATCAAT…
Cyanothamnus anemonifolius	OL591173	0.5714	0.5	61	rpl23	ATGGATGGAATCAAATATGCAGTATTTACAGACAAAAGTATTCGGTTATTGGGGAAAAATCAATATACTTCTAATGTCGAATCAGGATCAACTAGGACAGAAATAAAGCATTGGGTCGAACTCTTCTTTGGTGTCAAGGTAATAGCTATGAATAGTCATCAACTCCCCCGAAAGGATAGAAGAATGGGACCTATTATGGCACATACTGTGCATTACAGACGTATGATCATTACACTTCAACCGGGTTATTCTATTCCACCTCTCAGAAAGAAAAGAACTTAA
Cyanothamnus anemonifolius	OL591173	0.5	0.5027	56.062	rpl2	ATGGCGGTACATTTATACAAAACTTCTACCCCGAGCACACGCAATGGAGCCGTAGACAGTCAAGTGAAATCCAATCCACGAAATAATTTGATCTATGGACAGCATCGTTGTGGTAAAGGTCGTAATGCCAGAGGAATCATTACCGCAGGGCATAGAGGGGGAGGTCATAAGCGTCTATACCGTAAAATCAATTTTCGACGGAAGGAAAAAGACATATATGGTAGAATCGTAACCATAGAATACGACCCTAATCGAAATCCATACATTTGTCTCATACACTATGGGGATGGTGAGAAGAGATATATTTTACATCCCAGAGGGGCTATAATTGGAGATACCATTGTTTCTGGTACAGAAGTTCCTATAAAAATGGGAAATGCCCTACCTTTGACCGATATG…
Dictamnus albus	MZ750957	0.45	0.5181	61	rps12	ATGCCAACTATTAAACAACTTATTAGAAACCCAAGACAGCCAATCAGAAACGTTACAAAATCCCCCGCTCTTCGGGGATGCCCTCAGCGCCGAGGAACATGTACAAGGGTGTATGTGCGACTCGTTACTATCACCCCCAAAAAACCAAACTCTGCCTTACGTAAAGTTGCCAGAGTACGATTAACCTCTGGGTTTGAAATCACTGCTTATATACCTGGTATTGGCCATAATTCACAAGAACATTCTGTAGTCTTAGTAAGAGGGGGGAGGGTTAAGGATTTACCCGGTGTGAGATATCACATTGTTCGAGGAACCCTAGATGCTGTCGGAGTAAAGGATCGTCAACAAGGGCGTTCTAGTGCGTTGTAG
Dictamnus albus	MZ750957	0.3333	0.3291	34.7072	psbA	ATGACTGCAATTTTAGAGAGACGCGAAAGCGAACGCCTATGGGGTCGCTTCTGTAACTGGATAACCAGCACCGAAAACCGCCTTTACATTGGATGGTTTGGTGTTTTGATGATCCCTACTTTATTGACCGCAACTTCTGTATTTATTATCGCCTTCATTGCTGCCCCTCCAGTAGATATTGATGGTATTCGTGAACCTGTTTCTGGATCTCTACTTTATGGAAACAATATTATTTCTGGTGCGATTATTCCTACTTCTGCAGCTATAGGTTTGCACTTTTACCCAATATGGGAAGCGGCATCTGTTGATGAATGGTTATACAATGGCGGTCCTTATGAGCTAATTGTTCTACACTTCTTACTTGGTGTAGCTTGTTACATGGGTCGTGAGTGGGAACTT…
Dictamnus albus	MZ750957	0.5068	0.4	55.3817	matK	ATGGAGGAATTTCAAGTATATTTAGAACTAGATAGATCTCAACAACACGACTTCCTATACCCACTTCTTTTTCGGGAGTATATTTATGCACTTGCTCATTATCATGGTTTAAATAGCTCGACGATTTCAGTGGAAAGTAGGGGTTATGACAATAAATCTAGTTCACTAAGTGTGAAACGGGTAATTACTCGAATGTATCAACAGATTAATTTTAGTATTGCTGCTAATGACTCTAACCAAAGTCCAAATTTTGGGCACAACAATAAGTTGTATTCTCAAATTATATCAGAGGGATTTGCTGTCGTGGTGGAAGTTCCATTTTCCCGACGGTTGGTAGCTTTTTTAGACGGGAAAGAATTTGAAAAATCTCATAATTTCCAATCACTTCATTCAATATTT…
Dictamnus albus	MZ750957	0.5263	0.4286	52.975	rps16	ATGGTAAAACTTCGTTTGAAACGATGTGGTAGAAAGCAACGTGCCGTTTATCGAATCGTTGCAATTGATGGTCGATCTCGAAGAGAAGGAAGAGATCTTAGGAAAGTGGGTTTTTATGATCCGATAAATAATCAAACCCATTTAAATGTTCCTGCTATTCTATATTTCCTTGACAAGGGCGCCCAACCTACAGGAACCGTTCATGATATTTCAAAGAAAGCGGGGGTTTTTACAGAACTTAGTCTTAATCAAACAAAATTCTATTAA
Dictamnus albus	MZ750957	0.45	0.3095	34.8601	psbK	ATGCTTAATATCTTTAGTTTCATGTATATCTGTCTTAATTCTGCCCTTTATTCGAGTAGTTTTTTATTCGCCAAATTGCCCGAGGCCTACGCTTTTTTGAATCCAATTGTAGATGTTATGCCAGTAATACCTCTTCTATTTTTGCTCTTAGCCTTTGTTTGGCAAGCTGCTGTAAGTTTTCGATAA
Dictamnus albus	MZ750957	0.2353	0.45	61	psbI	ATGCTTACTCTCAAACTCTTTGTTTACACCGTAGTGATATTCTTTGTTTCTCTCTTCATCTTCGGATTCCTGTCTAACGATCCAGGGCGTAATCCCGGACGCGAAGAATAA
Dictamnus albus	MZ750957	0.4966	0.5014	50.5255	atpA	ATGGCAACAATTAAAGCCGACGAAATTAGTAATATTATCCGTGAACGTATTGAGCAATATAATAGAGAAGTAAAGATTGTAAATATTGGTACCGTACTTCAAGTAGGCGACGGCATCGCCCGTATTTATGGTCTTGATGAAGTAATGGCAGGTGAATTAGTAGAATTTGAAGAGGGTACAATAGGCATTGCTCTTAATTTGGAATCAAATAATGTTGGTGTTGTTTTAATGGGTGACGGTTTAATGATACAAGAGGGAAGTTCTGTAAAAGCAACCGGAAAAATTGCTCAGATACCAGTAAGCGAGGCATATTTAGGTCGTGTTATAAATGCCCTGGCTAAACCTATTGATGGTCGAGGTGAAATTTCAGCTTCTGAATCTCGATTAATTGAATCTCCC…
Dictamnus albus	MZ750957	0.6129	0.5122	50.1113	atpF	ATGAAAAATGTAACCGATTCTTTCGTTTCTTTGGTTCACTGGCCATTCGCCGGGAGTTTCGGGTTTAATACCGATATTTTAGCAACAAATCCAATAAATCTAAGTGTAGTGCTTGGTGTATTGCTCTTTTTTGGAAAGGGAGTGTTAATTGATTTATTAGATAATCGCAAACTGAGGATCTTGAATAGTATTCGAAATTCAGAAGAACTGCAGGCCGGGGCCGTTGAACGGCTGGAAAAAGCCCGGGCCCGGTTACGGAAAATAAAAATAGAAGCAGATCAGTTTCGGGTGAATGGATACTCTGAGATAGAACGAGAAAAATTAAATTTGATTAATTCAACTTATACGACTTTGGACCAATTAGAAAATTACAAAAATGAAACCATTCATTTTGAACAA…
Dictamnus albus	MZ750957	0.6957	0.3729	59.3281	atpH	ATGAATCCCCTTATTTCTGCCGCTTCCGTTATTGCCGCTGGGTTGGCTGTTGGGCTTGCTTCTATTGGACCTGGTGTTGGTCAAGGTACTGCTGCGGGCCAAGCAGTAGAAGGGATCGCGAGACAACCCGAGGCGGAGGGAAAAATACGAGGTACTTTATTGCTTAGTCTGGCTTTTATGGAAGCTTTAACAATTTATGGACTGGTTGTAGCATTAGCGCTTTTATTTGCGAATCCTTTTGTTTAA
Dictamnus albus	MZ750957	0.4	0.4277	60.8113	atpI	ATGAATGTTCTATCATGTTCCATCAACACACTAAAGGGGTTATACGATATATCCGGTGTGGAAGTAGGCCAACATTTCTATTGGCAAATAGGCGGGTTCCAAGTCCATGCCCAAGTACTTATTACTTCTTGGGTTGTTATTGCTATCTTATTAGGTTCGGCCTTTATAGCCGTTCGGAATCCACAAACCGTTCCGACTGCCAGTCAAAATTTCTTCGAATATGTCCTTGAATTCATTCGAGACGTGAGCAAAACCCAGATTGGAGAAGAATATGGCCCATGGGTTCCCTTTATTGGAACTATGTTTCTTTTTATTTTTGTTTCTAATTGGTCAGGTGCTCTTTTACCTTGGAAAATCATAGAGTTACCTCATGGGGAGTTAGCCGCACCCACGAATGAT…
Dictamnus albus	MZ750957	0.5479	0.4451	53.9839	rps2	ATGGAAAGAAGATATTGGAACATCCATTTGGAAGAGATGATGGAAGCAGGAATTCATTTTGGTCATGGTACTCGGAAATGGAATCCTAGAATGGCACCTTATATATCTGCAAAACATAAAGGTATTCATATTACAAATCTGACTCGAACTGCTCGTTTTTTATCAGAAGCTTGTGATTTAGTTTTTGATGCAGCAAGTAGGGGAAAACAATTCTTAATTGTTGGTACTAACAATAAAGCAGCTGATTCAGTCGCGCGAGCTGCAATAAGGGCTCGGTGTCATTATGTTAATAAAAAATGGCTCGGTGGTATGTTAACGAATTGGTCCACTACAGAAACGAGACTTCACAAGTTCAGGGATTTGAGAACGGAACAAAAAAAGGGGAGACTCAACAGTCTT…
Dictamnus albus	MZ750957	0.574	0.4744	52.0523	rpoC2	ATGGCAGAACGGGCGAGTCTAGTCTTTCACAATAAAATGGTAGATGGAATTGCCATTAAACGACTTATTAGCAGGTTAATAGATCACTTCGGAATGGCATATACATCACACATCCTGGATCAAGTAAAGACCCTGGGTTTCCTACAAGCCACTGCTACATCTATTTCATTAGGCATTGATGATCTTTTAACGATCCCTTCTAAGCGAGGGCTAGTCCAAGATGCTGAACACCAAAGTTTTATTTTGGAAAAACACCATCATTATGGGAATGTGCACGCGATAGAAAAACTACGTCAATCCATTGAGATATGGTATGCTACAAGTGAATATTTGCGACAAGAAATGAATCCTAATTTTAGGATGACAGATCCCTTTAATCCAGTCCATATAATGTCTTTT…
Dictamnus albus	MZ750957	0.5922	0.4669	47.8216	rpoC1	ATGATTGATCGATATAAACATCAACAACTCCGAATTGGATCAGTTTCTCCTCAACAAATAAGCGCTTGGGCCAAGAAAATCCTACCTAATGGAGAGATAGTTGGAGAAGTGACAAAACCCTATACTTTTCATTACAAAACCAATAAACCGGAAAAAGATGGATTATTTTGTGAAAGAATTTTTGGGCCTATTAAAAGTGGAATTTGTGCTTGTGGAAATTATCGAATAATCGGAGATGAAAAAGAAGACCCGCAATTTTGTGAACAATGTGGAGTTGAATTTGTTGATTCTCGGATACGAAGATATCAAATGGGATATATAAAACTGGGATGCCCAGTAACCCACGTGTGGTATTTGAAATGTCTTCCTAGTTATATAGCGAATCTTTTAGATAAACCT…
Dictamnus albus	MZ750957	0.6192	0.4947	50.649	rpoB	ATGCTCGGAGATGGAAATGCGGGAATGTCTACAATACCTGGGTTGAATCAGATACAATTTGAAGGCTTTTGTAGGTTCATTGATCAGGGCTTAACAGAAGAACTTTCTAAGTTTCCAAAAATTGAAGATACAGATCAAGAAATTGAATTTCAACTATTTGTGGAAACATATCAATTGGTAGAACCCTTGCTAAAAGAAAGAGATGCTGTATATGAATCATTCACGTATTCTTCTGAATTATATGTATCCGCAGGATTAATTTGGAAAAGCCGAGGGGATATGCAGGAACAAACAATTTTTATTGGAAACATTCCTCTAATGAATTCTTTGGGAACTTCTATAGTAAATGGAATACACAGAATTGTCATCAATCAAATATTGCAAAGTCCCGGTATCTAT…
Dictamnus albus	MZ750957	0.5833	0.5556	33.5714	petN	ATGGATATAGTAAGTCTCGCTTGGGCTGCGTTAATGGTAGTCTTTACATTTTCCCTTTCGCTCGTAGTATGGGGAAGAAGTGGACTCTAG
Dictamnus albus	MZ750957	0.4444	0.4231	51.4545	psbM	ATGGAAGTAAATATTCTCGCATTTATTGCTACTACACTGTTCGTTCTAGTTCCTACTGCTTTTTTGCTTATAATATACGTAAAAACGGTCAGTAAAAGCGATTAA
Dictamnus albus	MZ750957	0.4672	0.3534	51.7845	psbD	ATGACTATAGCCCTTGGTAAATTTACCAAAGATGAAAAAGATTTATTTGATATTATGGATGACTGGTTACGGAGGGACCGATTCATTTTTGTAGGTTGGTCCGGTCTATTGCTCTTTCCTTGTGCCTATTTCGCTTTAGGGGGTTGGTTCACAGGCACAACCTTTGTAACTTCATGGTATACCCATGGATTGGCCAGTTCCTATTTGGAAGGCTGCAACTTCTTAACCGCCGCAGTTTCTACTCCTGCTAATAGTTTAGCGCATTCTTTGTTGTTACTATGGGGTCCTGAAGCACAGGGGGATTTTACTCGTTGGTGTCAATTAGGCGGTCTTTGGACTTTTGTTGCTCTCCACGGTGCTTTCGGACTAATAGGTTTCATGTTACGTCAATTTGAACTT…
Dictamnus albus	MZ750957	0.4777	0.4101	50.3104	psbC	ATGAAAACCTTATATTCCCTGAGGAGGTTCTACCCCGTGGAAACGCTCTTTAATGGAACTTTAGCTGTAGCAGGTCGTGACCAAGAAACCACCGGTTTCGCTTGGTGGGCCGGGAATGCCCGACTTATCAATTTATCCGGTAAACTGCTGGGCGCTCATGTAGCCCATGCTGGATTAATCGTATTCTGGGCCGGAGCAATGAACCTATTTGAAGTGGCTCATTTCGTACCAGAAAAGCCCATGTATGAACAAGGATTAATTTTACTTCCCCACCTAGCTACTCTAGGCTGGGGGGTAGGTCCTGGTGGGGAAGTTATAGACACCTTTCCATACTTTGTATCTGGAGTACTTCACTTAATTTCCTCCGCAGTATTGGGCTTTGGCGGTATTTATCATGCC…
Dictamnus albus	MZ750957	0.4706	0.3478	54.9674	psbZ	ATGAATATTGCTTTCCAATTGGCTGTTTTTGCATTAATTGCTACTTCATCAATCTTACTTATTAGTGTACCCGTTGTATTTGCTTCTCCGGATGGTTGGTCGAGTAACAAAAATGTCGTATTTTCTGGTACATCATTGTGGATTGGATTAGTCTTTCTGGTAGGTATCCTTAATTCTCTCATCTCTTAA
Dictamnus albus	MZ750957	0.7353	0.5522	45.7569	rps14	ATGGCAAGGAAAAGTTTGATTCATAGGGAGAAGAAAAGGAAAAAATTGGAACAAAAATATCATTTGATTCGTCGATCCTCAAAAAAAGAAATAAACAAAGTTCCGTCGTTGAGCGATAAATGGAGAATTCATGGAAAGTTACAATCCTCACCGCGTAATAGTGCACCTACACGTCTTCATCGACGTTGTTTTTCGACCGGAAGGCCGAGAGCTAACTATCGAGACTTTGGACTATCCGGACACATACTTCGTGAAATGGTTCATGCGTGTTTGTTGCCGGGGGCAACAAGATCAAGTTGGTAA
Dictamnus albus	MZ750957	0.5473	0.376	51.3797	psaB	ATGGCATTAAGATTTCCAAGGTTTAGCCAAGGCTTAGCTCAGGACCCCACTACTCGTCGTATTTGGTTTGGTATTGCTACCGCACATGACTTCGAGAGTCATGATGATATTACTGAGGAACGTCTTTATCAGAATATTTTTGCTTCTCACTTCGGGCAATTAGCAATAATTTTTCTGTGGACTTCCGGAAATCTCTTTCATGTAGCTTGGCAAGGAAATTTTGAGGCATGGGTACAGGACCCTTTACATGTAAGACCTATTGCTCATGCAATTTGGGATCCTCATTTTGGTCAACCGGCCGTGGAAGCTTTTTCTCGGGGAGGTGCTCTTGGCCCGGTGAATATCGCTTATTCTGGTGTTTATCAGTGGTGGTATACAATCGGTTTACGCACCAATGAG…
Dictamnus albus	MZ750957	0.5076	0.4172	52.0432	psaA	ATGATTATTCGTTCGCCGGAACCAGAAGTAAAAATTTTGGTAGATAGGGATCCCATAAAAACTTCTTTCGAGGAATGGGCCAGACCGGGTCATTTCTCAAGAACCATAGCTAAGGGACCTGATACTACCACTTGGATCTGGAACCTACATGCTGATGCTCACGACTTTGATAGCCATACCAGTGATTTGGAGGAGATCTCTCGAAAAGTATTTAGTGCCCATTTCGGACAACTCTCCATCATTTTTCTTTGGCTGAGCGGCATGTATTTCCACGGTGCTCGTTTTTCCAATTATGAAGCCTGGCTAAGCGATCCTACTCACATTGGACCTAGTGCACAGGTGGTTTGGCCAATAGTGGGCCAAGAAATATTGAACGGTGATGTGGGCGGGGGTTTCCGA…
Dictamnus albus	MZ750957	0.5172	0.4643	61	ycf3	ATGCCTAGATCGCGGATAAATGGAAATTTTATTGATAAGACCTTTTCAATTGTAGCCAATATATTATTACGAATAATTCCGACAACTTCAGGAGAAAAAGAGGCATTTACCTATTACAGAGATGGTGCGATGTCAGCTCAATCTGAAGGCAATTATGCGGAAGCTTTACAGAATTATTATGAAGCTATGCGACTAGAAATTGATCCCTACGATCGAAGCTATATACTCTATAACATAGGCCTTATCCACACAAGTAACGGAGAACATACAAAAGCTTTAGAATATTATTTTCGGGCACTCGAACGAAATCCATTCTTACCACAAGCTTTTAATAATATGGCTGTGATCTGTCATTACCGGGGAGAACAGGCCGTTCGGCAGGGCGATTCCGAAATTGCG…
Dictamnus albus	MZ750957	0.4717	0.5034	61	rps4	ATGTCACGTTACCGAGGGCCTCGTTTCAAAAAAATACGCCGTCTGGGGGCTTTACCGGGACTAACGAGTAAAAGGCCTAGAGCCGTAAGCGATTTTAGAAACCAATCGCGCTCCGGAAAAAAATCTCAATATCGAATTCGTTTAGAAGAAAAACAAAAATTGCGTTTTCATTATGGTCTTACAGAACGACAACTACTTAAATATGTTCGTATCGCCGGAAAAGCCAAAGGGTCAACCGGTCTGGTTTTACTACAATTACTTGAAATGCGTTTGGATAACATTCTTTTTCGATTGGGTATGGCTTCAACTATTCCTCAAGCCCGCCAATTGGTTAACCATCGACATATTTTAGTTAATGGACGTATAGTCGATATACCAAGTTATCGTTGCAAACCCCGA…
Dictamnus albus	MZ750957	0.6122	0.4091	61	ndhJ	ATGCAGGGTCGTTTGTCTGCTTGGCTAGTCAAGCATGGGCTAGTTCATAGATCTTTGGGCTTCGATTACCAAGGAATAGAAACTTTACAAATAAAGCCCGAGGATTGGCATTCCGTTGCTGTTATTTTGTATGTATATGGTTACAATTATCTACGTTCCCAATGTGCCTATGATGTAGCACCGGGTGGACTCTTAGCCAGTGTGTATCATCTTACGCGACTAGAGTATGGTGTAGATCAACCAGAAGAGGTATGCATAAAAGTATTTGCTCCAAGGAGTAATCCTAAAATTCCATCTGTTTTCTGGGTTTGGAAAAGTGCGAATTTTCAAGAACGGGAATCTTATGATATGTTGGGAATCCTTTATGATAATCATCCACGACTGAAACGTATCTTAATG…
[truncated: 1,976 more rows]
